# Supplementary material for: Access to carbamates and o-aminobenzoates via oxidative carbonylation of amines with CO and alcohols under rhodium/copper catalysis
Source: Royal Society of Chemistry journal article supplement (doi:10.1039/d4qo00276h), 2024-01-01

# Supporting Information

## Access to carbamates and *o*-aminobenzoates via oxidative carbonylation of amines with CO and alcohols under rhodium/copper catalysis

Xiaoqi Chen,<sup>‡a</sup> Xuyao Zhong,<sup>‡a</sup> Lei Wang,<sup>‡a</sup> Houyun Teng,<sup>a</sup> Jingsheng Li,<sup>b</sup> Shuai Chen,<sup>b</sup> Rongjing Hu<sup>\*a,c</sup> and Lei Yang<sup>\*a</sup>

<sup>a</sup>College of Material, Chemistry and Chemical Engineering, Key Laboratory of Organosilicon Chemistry and Material Technology of Ministry of Education, Key Laboratory of Organosilicon Material Technology of Zhejiang Province, Hangzhou Normal University, Hangzhou 311121, China

<sup>b</sup>Kharkiv Institute at Hangzhou Normal University, Hangzhou 311121, China

<sup>c</sup>Library of Hangzhou Normal University, Hangzhou 311121, China

\*Email: hurj@hznu.edu.cn; lyang@hznu.edu.cn; yangunibas@126.com

### Table of Contents

|                                                                  |     |
|------------------------------------------------------------------|-----|
| 1. General information.....                                      | S2  |
| 2. General procedures for oxidative carbonylation of amines..... | S3  |
| 3. Optimization studies.....                                     | S21 |
| 4. Preliminary mechanistic studies.....                          | S25 |
| 5. References.....                                               | S29 |
| 6. NMR spectra.....                                              | S31 |

## 1. General information

### Techniques

All reactions involving air and water-sensitive material were carried out in pre-dried glassware under nitrogen atmosphere by using Schlenk techniques employing double-line nitrogen-vacuum lines or working in an argon-filled glove box. Analytical thin layer chromatography (TLC) was performed using pre-coated Jiangyou silica gel HSGF254 (0.2mm±0.03mm). Visualization of the developed chromatogram was performed by UV absorbance (254 nm) or TLC stains (KMnO<sub>4</sub> and Phosphomolybdic acid). Flash chromatography was performed using Nuotai Shanxi silica gel (300-400 mesh) with the indicated solvent system.

### Chemicals

All chemicals were purchased from Leyan, Energy Chemical, Innochem, Bide Pharmatech, SINOPHARM, Sigma–Aldrich and used as received unless otherwise noted. Anhydrous solvents were purchased from J&K Scientific or Energy Chemical, degassed by three freeze-pump-thaw cycles and storing in single-necked flasks equipped with *J*-Young PTFE valve when necessary.

### Instrumentation

GC-MS analyses were performed with Shimadzu GCMS-QP2010 SE GC-MS system. Nuclear magnetic resonance spectra were recorded on a Bruker Avance™ III 400 MHz in deuterated chloroform unless otherwise noted. Data are reported in parts per million (ppm) as follows: chemical shift, multiplicity (s = singlet, d = doublet, t = triplet, q = quartet, quint = quintet, m = multiplet, dd = doublet of doublet and br = broad), coupling constant in Hz and integration. High resolution mass spectra were recorded on a Bruker micro QII-ESI-TOF. Melting points were recorded using a Yidianwuguang Micromelting point apparatus SGW X-5.

## 2. General procedures for oxidative carbonylation of amines

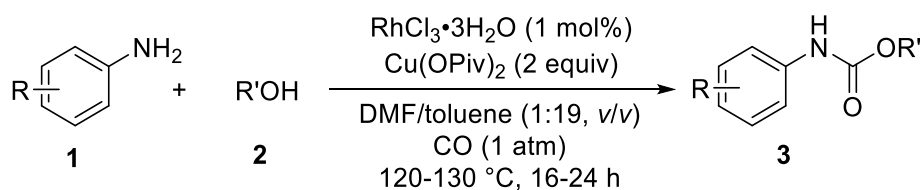

### General procedure A

In a glovebox, RhCl<sub>3</sub>·3H<sub>2</sub>O (0.002 mmol, 0.01 equiv), Cu(OPiv)<sub>2</sub> (0.4 mmol, 2 equiv), were successively weighed into a dry 25 mL *J*-Young tube equipped with a magnetic stir bar. The *J*-Young tube was sealed and taken out of the glovebox. Amine **1** (0.2 mmol, 1 equiv), alcohol **2** (1 mmol, 5 equiv), dry toluene (1.9 mL) and dry DMF (0.1 mL) were added under nitrogen. The reaction mixture was then degassed by three freeze-pump-thaw cycles, backfilled with CO and heated at 120 °C or 130 °C. After indicated time, the reaction mixture was cooled to room temperature. The solvent was evaporated under reduced pressure and the resulting residue was purified by flash column chromatography on silica gel using EtOAc–petroleum ether mixture as an eluent to afford the desired compound **3**.

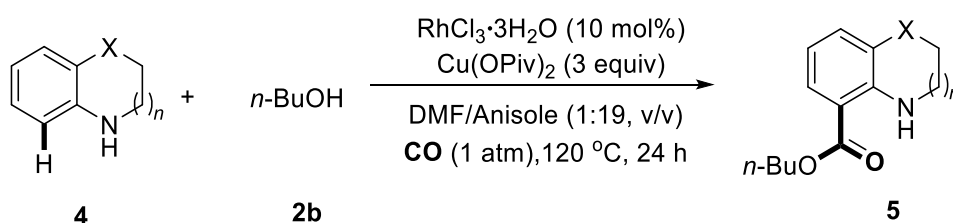

### General Procedure B

In a glovebox, RhCl<sub>3</sub>·3H<sub>2</sub>O (0.02 mmol, 0.1 equiv), Cu(OPiv)<sub>2</sub> (0.6 mmol, 3 equiv) were successively weighed into a dry 25 mL *J*-Young tube equipped with a magnetic stir bar. The *J*-Young tube was sealed and taken out of the glovebox. **4** (0.2 mmol, 1 equiv), *n*-butanol **2b** (5 equiv), dry anisole (1.9 mL) and dry DMF (0.1 mL) were added under nitrogen. The reaction mixture was then degassed by three freeze-pump-thaw cycles, backfilled with CO and heated at 120 °C. Then, the reaction mixture was cooled to room temperature. The solvent was evaporated under reduced pressure and the resulting residue was purified by flash column chromatography on silica gel using EtOAc–petroleum ether mixture as an eluent to afford the desired compound **5**.

### Isopropyl phenylcarbamate (3aa)

Obtained according to the **General procedure A** (120 °C /16 h), to give **3aa** as a white solid (33.5 mg, 94% yield). Flash column chromatography (petroleum ether/ethyl acetate, 50:1);  $R_f$  0.4 (petroleum ether/ethyl acetate, 10:1). Spectroscopic data are consistent with those previously reported.<sup>[1]</sup>

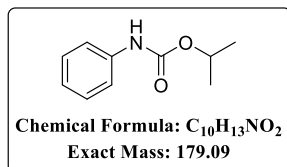

<sup>1</sup>H NMR (400 MHz, CDCl<sub>3</sub>) δ 7.40 (d,  $J$  = 8.0 Hz, 2H), 7.30 (t,  $J$  = 8.0 Hz, 2H), 7.05 (t,  $J$  = 7.3 Hz, 1H), 6.73 (s, 1H), 5.03 (hept,  $J$  = 6.3 Hz, 1H), 1.30 (d,  $J$  = 6.2 Hz, 6H).

<sup>13</sup>C{<sup>1</sup>H} NMR (101 MHz, CDCl<sub>3</sub>) δ 153.4, 138.2, 129.1, 123.3, 118.7, 68.8, 22.2.

### isopropyl (2-methoxyphenyl)carbamate (3ba)

Obtained according to the **General procedure A** (120 °C /16 h), to give **3ba** as a yellow oil (33.4 mg, 80% yield). Flash column chromatography (petroleum ether/ethyl acetate, 40:1);  $R_f$  0.3 (petroleum ether/ethyl acetate, 10:1). Spectroscopic data are consistent with those previously reported.<sup>[2]</sup>

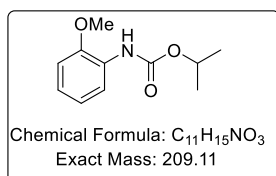

<sup>1</sup>H NMR (400 MHz, CDCl<sub>3</sub>) δ 8.02 (s, 1H), 7.11 (s, 1H), 6.93 – 6.83 (m, 2H), 6.76 (d,  $J$  = 9.5 Hz, 1H), 4.94 (p,  $J$  = 6.3 Hz, 1H), 3.77 (s, 3H), 1.22 (d,  $J$  = 6.3 Hz, 6H).

<sup>13</sup>C{<sup>1</sup>H} NMR (101 MHz, CDCl<sub>3</sub>) δ 153.3, 147.6, 128.0, 122.6, 121.2, 118.2, 110.0, 68.6, 55.7, 22.2.

### isopropyl o-tolylcarbamate (3ca)

Obtained according to the **General procedure A** (120 °C /16 h), to give **3ca** as a yellow oil (36 mg, 93% yield). Flash column chromatography (petroleum ether/ethyl acetate, 40:1);  $R_f$  0.3 (petroleum ether/ethyl acetate, 10:1). Spectroscopic data are consistent with those previously reported.<sup>[1]</sup>

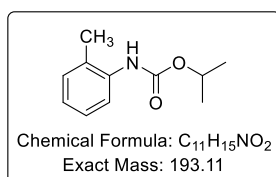

<sup>1</sup>H NMR (400 MHz, CDCl<sub>3</sub>) δ 7.82 (s, 1H), 7.25 – 7.13 (m, 2H), 7.02 (t,  $J$  = 7.4 Hz, 1H), 6.39 (s, 1H), 5.03 (hept,  $J$  = 6.2 Hz, 1H), 2.25 (s, 3H), 1.31 (d,  $J$  = 6.3 Hz, 6H).

<sup>13</sup>C NMR (101 MHz, CDCl<sub>3</sub>) δ 153.6, 136.1, 130.4, 127.6, 126.9, 124.0, 121.1, 68.8, 22.1, 17.7.

### isopropyl [1,1'-biphenyl]-2-ylcarbamate (3da)

Obtained according to the **General procedure A** (120 °C /24 h), to give **3da** as a yellow oil (31.9 mg, 63% yield). Flash column chromatography (petroleum ether/ethyl acetate, 30:1);  $R_f$  0.4 (petroleum ether/ethyl acetate, 10:1). Spectroscopic data are consistent with those previously reported.<sup>[3]</sup>

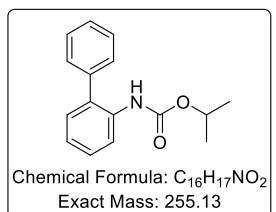

<sup>1</sup>H NMR (400 MHz, CDCl<sub>3</sub>) δ 8.16 (d,  $J$  = 8.3 Hz, 1H), 7.49 (d,  $J$  = 7.6 Hz, 2H), 7.40 (dd,  $J$  = 20.0, 6.9 Hz, 4H), 7.22 (d,  $J$  = 7.6 Hz, 1H), 7.12 (t,  $J$  = 7.5 Hz, 1H), 6.59 (s, 1H), 4.99 (h,  $J$  = 6.2 Hz, 1H), 1.25 (d,  $J$  = 6.3 Hz, 6H).

<sup>13</sup>C NMR (101 MHz, CDCl<sub>3</sub>) δ 153.4, 138.4, 135.1, 131.5, 130.3, 129.4, 129.2, 128.6, 127.9, 123.3, 119.8, 68.8, 22.1.

### isopropyl (2-(*tert*-butyl)phenyl)carbamate (**3ea**)

Obtained according to the **General procedure A** (120 °C /24 h), to give **3ea** as a yellow oil (36.7 mg, 78% yield). Flash column chromatography (petroleum ether/ethyl acetate, 40:1);  $R_f$  0.4 (petroleum ether/ethyl acetate, 10:1).

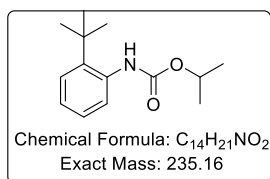

<sup>1</sup>H NMR (400 MHz, CDCl<sub>3</sub>) δ 7.49 (s, 1H), 7.29 (d,  $J$  = 8.0 Hz, 1H), 7.15 (t,  $J$  = 7.6 Hz, 1H), 7.05 (t,  $J$  = 7.6 Hz, 1H), 6.36 (s, 1H), 4.95 (hept,  $J$  = 6.3 Hz, 1H), 1.33 (s, 9H), 1.21 (d,  $J$  = 6.2 Hz, 6H).

<sup>13</sup>C{<sup>1</sup>H} NMR (101 MHz, CDCl<sub>3</sub>) δ 154.3, 142.0, 135.6, 126.9, 126.5, 125.5, 68.8, 34.6, 30.7, 22.3.

HRMS (ESI)  $m/z$ : Calculated for C<sub>14</sub>H<sub>21</sub>NO<sub>2</sub> [M+Na]<sup>+</sup>: 258.1465, found: 258.1466.

### isopropyl (3-fluorophenyl)carbamate (**3fa**)

Obtained according to the **General procedure A** (120 °C /24 h), to give **3fa** as a white solid (31.3 mg, 80% yield). Flash column chromatography (petroleum ether/ethyl acetate, 40:1);  $R_f$  0.4 (petroleum ether/ethyl acetate, 10:1). Spectroscopic data are consistent with those previously reported.<sup>[4]</sup>

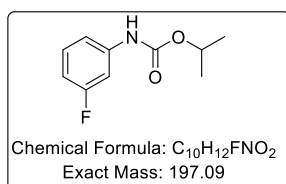

<sup>1</sup>H NMR (400 MHz, CDCl<sub>3</sub>) δ 7.26 (d,  $J$  = 11.4 Hz, 1H), 7.21 – 7.10 (m, 1H), 6.94 (d,  $J$  = 8.1 Hz, 1H), 6.74 – 6.59 (m, 2H), 4.94 (hept,  $J$  = 6.3 Hz, 1H), 1.22 (d,  $J$  = 6.3 Hz, 6H).

<sup>13</sup>C{<sup>1</sup>H} NMR (101 MHz, CDCl<sub>3</sub>) δ 163.3 (d,  $J$  = 244.8 Hz), 153.1, 139.9 (d,  $J$  = 11.3 Hz), 130.2 (d,  $J$  = 9.1 Hz), 113.9, 110.0 (d,  $J$  = 24.8 Hz), 106.1 (d,  $J$  = 27.2 Hz), 69.2, 22.1.

### isopropyl (3-chlorophenyl)carbamate (**3ga**)

Obtained according to the **General procedure A** (120 °C /16 h), to give **3ga** as a white solid (29.7 mg, 70% yield). Flash column chromatography (petroleum ether/ethyl acetate, 40:1);  $R_f$  0.4 (petroleum ether/ethyl acetate, 10:1). Spectroscopic data are consistent with those previously reported.<sup>[5]</sup>

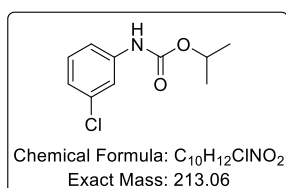

<sup>1</sup>H NMR (400 MHz, CDCl<sub>3</sub>) δ 7.51 (s, 1H), 7.24 – 7.16 (m, 2H), 7.01 (dt,  $J$  = 5.1, 2.2 Hz, 1H), 6.72 (s, 1H), 5.02 (h,  $J$  = 6.3 Hz, 1H), 1.29 (d,  $J$  = 6.3 Hz, 6H).

<sup>13</sup>C{<sup>1</sup>H} NMR (101 MHz, CDCl<sub>3</sub>) δ 153.1, 139.4, 134.8, 130.1, 123.3, 118.7, 116.6, 69.2, 22.2.

### isopropyl (3-methoxyphenyl)carbamate (**3ha**)

Obtained according to the **General procedure A** (120 °C /16 h), to give **3ha** as a yellow oil (33.7 mg, 81% yield). Flash column chromatography (petroleum ether/ethyl acetate, 40:1);  $R_f$  0.3 (petroleum ether/ethyl acetate, 10:1). Spectroscopic data are consistent with those previously reported.<sup>[6]</sup>

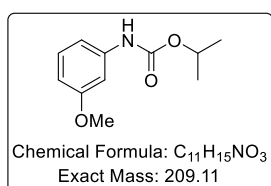

<sup>1</sup>H NMR (400 MHz, CDCl<sub>3</sub>) δ 7.13 – 7.02 (m, 2H), 6.78 (d,  $J$  = 8.0 Hz, 1H), 6.69 (s, 1H), 6.52 (dd,  $J$  = 8.3, 2.5 Hz, 1H), 4.93 (p,  $J$  = 6.2 Hz, 1H), 3.70 (s, 3H), 1.20 (d,  $J$  = 6.3 Hz, 6H).

<sup>13</sup>C{<sup>1</sup>H} NMR (101 MHz, CDCl<sub>3</sub>) δ 160.3, 153.3, 139.5, 129.8, 110.9, 109.2, 104.3, 68.8, 55.3, 22.2.

### isopropyl m-tolylcarbamate (3ia)

Obtained according to the **General procedure A** (120 °C /16 h), to give **3ia** as a yellow oil (33.6 mg, 87% yield). Flash column chromatography (petroleum ether/ethyl acetate, 40:1);  $R_f$  0.3 (petroleum ether/ethyl acetate, 10:1). Spectroscopic data are consistent with those previously reported.<sup>[1]</sup>

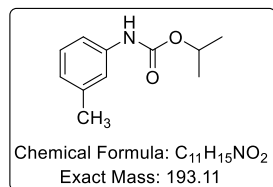

<sup>1</sup>H NMR (400 MHz, CDCl<sub>3</sub>)  $\delta$  7.24 (s, 1H), 7.16 (d,  $J$  = 6.6 Hz, 2H), 6.86 (d,  $J$  = 6.3 Hz, 1H), 6.60 (s, 1H), 5.01 (p,  $J$  = 6.3 Hz, 1H), 2.32 (s, 3H), 1.29 (d,  $J$  = 6.3 Hz, 6H).

<sup>13</sup>C{<sup>1</sup>H} NMR (101 MHz, CDCl<sub>3</sub>)  $\delta$  153.4, 139.0, 138.1, 128.9, 124.1, 119.3, 115.8, 68.7, 22.2, 21.6.

### isopropyl (3-(trifluoromethyl)phenyl)carbamate (3ja)

Obtained according to the **General procedure A** (130 °C /24 h), to give **3ja** as a yellow oil (37.9 mg, 77% yield). Flash column chromatography (petroleum ether/ethyl acetate, 40:1);  $R_f$  0.3 (petroleum ether/ethyl acetate, 10:1).

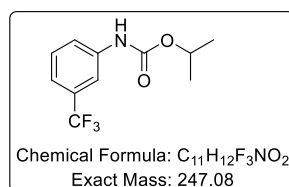

<sup>1</sup>H NMR (400 MHz, CDCl<sub>3</sub>)  $\delta$  7.65 (s, 1H), 7.46 (d,  $J$  = 8.7 Hz, 1H), 7.30 (t,  $J$  = 8.0 Hz, 1H), 7.22 – 7.17 (m, 1H), 6.88 (s, 1H), 4.94 (h,  $J$  = 6.3 Hz, 1H), 1.21 (d,  $J$  = 6.3 Hz, 6H).

<sup>13</sup>C{<sup>1</sup>H} NMR (101 MHz, CDCl<sub>3</sub>)  $\delta$  153.3, 138.9, 131.5 (q,  $J$  = 32.3 Hz), 129.6, 124.0 (q,  $J$  = 272.1 Hz), 121.7, 119.9 (q,  $J$  = 3.8 Hz), 115.4, 69.4, 22.1.

**HRMS (ESI) m/z:** Calculated for C<sub>11</sub>H<sub>12</sub>F<sub>3</sub>NO<sub>2</sub> [M+Na]<sup>+</sup>: 270.0712, found: 270.0718.

### isopropyl (4-chlorophenyl)carbamate (3ka)

Obtained according to the **General procedure A** (120 °C /16 h), to give **3ka** as a white solid (30.2 mg, 71% yield). Flash column chromatography (petroleum ether/ethyl acetate, 40:1);  $R_f$  0.3 (petroleum ether/ethyl acetate, 10:1). Spectroscopic data are consistent with those previously reported.<sup>[1]</sup>

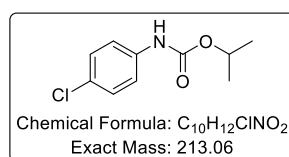

<sup>1</sup>H NMR (400 MHz, CDCl<sub>3</sub>)  $\delta$  7.33 (d,  $J$  = 8.6 Hz, 2H), 7.27 – 7.22 (m, 2H), 6.70 (s, 1H), 5.01 (p,  $J$  = 6.3 Hz, 1H), 1.28 (d,  $J$  = 6.2 Hz, 6H).

<sup>13</sup>C{<sup>1</sup>H} NMR (101 MHz, CDCl<sub>3</sub>)  $\delta$  153.3, 136.8, 129.1, 128.3, 119.9, 69.1, 22.2.

### isopropyl (4-(trifluoromethyl)phenyl)carbamate (3la)

Obtained according to the **General procedure A** (130 °C /24 h), to give **3la** as a white solid (26.2 mg, 53% yield). Flash column chromatography (petroleum ether/ethyl acetate, 40:1);  $R_f$  0.4 (petroleum ether/ethyl acetate, 10:1). Spectroscopic data are consistent with those previously reported.<sup>[7]</sup>

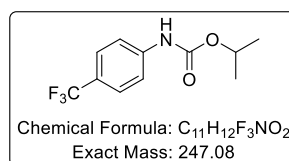

<sup>1</sup>H NMR (400 MHz, CDCl<sub>3</sub>)  $\delta$  7.48 (d,  $J$  = 8.6 Hz, 2H), 7.42 (d,  $J$  = 8.7 Hz, 2H), 6.72 (s, 1H), 4.96 (hept,  $J$  = 6.3 Hz, 1H), 1.23 (d,  $J$  = 6.2 Hz, 6H).

$^{13}\text{C}\{^1\text{H}\}$  NMR (101 MHz,  $\text{CDCl}_3$ )  $\delta$  153.0, 141.4, 126.3 (q,  $J = 3.8$  Hz), 125.1 (q,  $J = 32.9$  Hz), 124.3 (q,  $J = 271.5$  Hz), 118.1, 69.5, 22.2.

#### isopropyl (4-(tert-butyl)phenyl)carbamate (3ma)

Obtained according to the **General procedure A** (120 °C /16 h), to give **3ma** as a white solid (39.9 mg, 85% yield). Flash column chromatography (petroleum ether/ethyl acetate, 40:1);  $R_f$  0.4 (petroleum ether/ethyl acetate, 10:1). Spectroscopic data are consistent with those previously reported.<sup>[8]</sup>

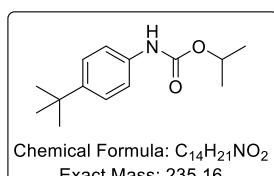

$^1\text{H}$  NMR (400 MHz,  $\text{CDCl}_3$ )  $\delta$  7.32 (m, 4H), 6.62 (s, 1H), 5.05 – 4.99 (m, 1H), 1.30 (m, 15H).

$^{13}\text{C}$  NMR (101 MHz,  $\text{CDCl}_3$ )  $\delta$  153.5, 146.3, 135.6, 125.9, 118.6, 68.7, 34.3, 31.5, 22.2.

#### isopropyl p-tolylcarbamate (3na)

Obtained according to the **General procedure A** (120 °C /16 h), to give **3na** as a yellow oil (34.1 mg, 88% yield). Flash column chromatography (petroleum ether/ethyl acetate, 40:1);  $R_f$  0.4 (petroleum ether/ethyl acetate, 10:1). Spectroscopic data are consistent with those previously reported.<sup>[9]</sup>

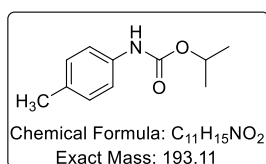

$^1\text{H}$  NMR (400 MHz,  $\text{CDCl}_3$ )  $\delta$  7.26 (d,  $J = 8.4$  Hz, 2H), 7.09 (d,  $J = 8.1$  Hz, 2H), 6.57 (s, 1H), 5.01 (hept,  $J = 6.3$  Hz, 1H), 2.29 (s, 3H), 1.29 (s, 6H).

$^{13}\text{C}\{^1\text{H}\}$  NMR (101 MHz,  $\text{CDCl}_3$ )  $\delta$  153.5, 135.6, 132.8, 129.6, 118.8, 68.6, 22.2, 20.8.

#### isopropyl (4-methoxyphenyl)carbamate (3oa)

Obtained according to the **General procedure A** (120 °C /16 h), to give **3oa** as a yellow solid (31.1 mg, 74% yield). Flash column chromatography (petroleum ether/ethyl acetate, 40:1);  $R_f$  0.4 (petroleum ether/ethyl acetate, 10:1). Spectroscopic data are consistent with those previously reported.<sup>[1]</sup>

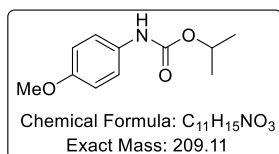

$^1\text{H}$  NMR (400 MHz,  $\text{CDCl}_3$ )  $\delta$  7.33 – 7.22 (m, 2H), 6.87 – 6.81 (m, 2H), 6.51 (s, 1H), 5.00 (hept,  $J = 6.3$  Hz, 1H), 3.78 (s, 3H), 1.28 (d,  $J = 6.2$  Hz, 6H).

$^{13}\text{C}\{^1\text{H}\}$  NMR (101 MHz,  $\text{CDCl}_3$ )  $\delta$  155.9, 153.7, 131.3, 120.7, 114.3, 68.7, 55.6, 22.2.

#### isopropyl (4-acetylphenyl)carbamate (3pa)

Obtained according to the **General procedure A** (120 °C /24 h), to give **3pa** as a white solid (30.9 mg, 70% yield). Flash column chromatography (petroleum ether/ethyl acetate, 8:1);  $R_f$  0.4 (petroleum ether/ethyl acetate, 10:1). Spectroscopic data are consistent with those previously reported.<sup>[2]</sup>

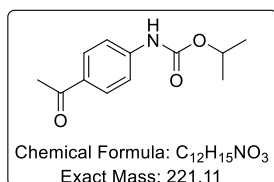

<sup>1</sup>H NMR (400 MHz, CDCl<sub>3</sub>) δ 7.93 (d, *J* = 8.8 Hz, 2H), 7.51 (d, *J* = 8.5 Hz, 2H), 7.14 (s, 1H), 5.04 (hept, *J* = 6.3 Hz, 1H), 2.58 (s, 3H), 1.30 (d, *J* = 6.3 Hz, 6H).

<sup>13</sup>C{<sup>1</sup>H} NMR (101 MHz, CDCl<sub>3</sub>) δ 197.2, 152.9, 142.9, 132.0, 130.0, 117.6, 69.3, 26.5, 22.1.

### isopropyl (4-(methoxymethyl)phenyl)carbamate (3qa)

Obtained according to the **General procedure A** (120 °C /24 h), to give **3qa** as a white solid (30.9 mg, 69% yield). Flash column chromatography (petroleum ether/ethyl acetate, 10:1); *R<sub>f</sub>* 0.4 (petroleum ether/ethyl acetate, 10:1). Spectroscopic data are consistent with those previously reported.<sup>[10]</sup>

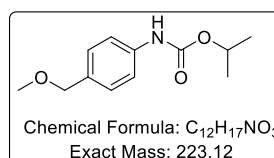

<sup>1</sup>H NMR (400 MHz, CDCl<sub>3</sub>) δ 7.36 (d, *J* = 8.1 Hz, 2H), 7.26 (d, *J* = 8.6 Hz, 2H), 6.76 (s, 1H), 5.02 (p, *J* = 6.3 Hz, 1H), 4.40 (s, 2H), 3.36 (s, 3H), 1.29 (d, *J* = 6.2 Hz, 6H).

<sup>13</sup>C NMR (101 MHz, CDCl<sub>3</sub>) δ 153.4, 137.8, 132.9, 128.8, 118.6, 74.4, 68.8, 58.0, 22.2.

### methyl 4-((isopropoxycarbonyl)amino)benzoate (3ra)

Obtained according to the **General procedure A** (120 °C /16 h), to give **3ra** as a white solid (32.3 mg, 68% yield). Flash column chromatography (petroleum ether/ethyl acetate, 15:1); *R<sub>f</sub>* 0.2 (petroleum ether/ethyl acetate, 10:1). Spectroscopic data are consistent with those previously reported.<sup>[11]</sup>

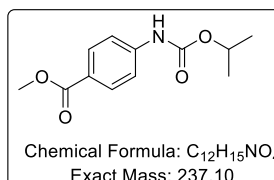

<sup>1</sup>H NMR (400 MHz, CDCl<sub>3</sub>) δ 8.03 – 7.92 (m, 2H), 7.46 (d, *J* = 8.5 Hz, 2H), 6.85 (s, 1H), 5.03 (p, *J* = 6.3 Hz, 1H), 3.89 (s, 3H), 1.30 (d, *J* = 6.3 Hz, 6H).

<sup>13</sup>C{<sup>1</sup>H} NMR (101 MHz, CDCl<sub>3</sub>) δ 166.9, 152.9, 142.6, 131.1, 124.7, 117.6, 69.4, 52.1, 22.2.

### isopropyl naphthalen-2-ylcarbamate (3sa)

Obtained according to the **General procedure A** (120 °C /16 h), to give **3sa** as a pink solid (33.7 mg, 74% yield). Flash column chromatography (petroleum ether/ethyl acetate, 30:1). *R<sub>f</sub>* 0.4 (petroleum ether/ethyl acetate, 10:1).

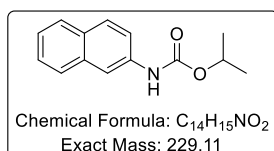

<sup>1</sup>H NMR (400 MHz, CDCl<sub>3</sub>) δ 8.01 (s, 1H), 7.77 (d, *J* = 8.9 Hz, 3H), 7.49 – 7.42 (m, 1H), 7.38 (t, *J* = 7.6 Hz, 2H), 6.81 (s, 1H), 5.09 (p, *J* = 6.3 Hz, 1H), 1.34 (d, *J* = 6.2 Hz, 6H).

<sup>13</sup>C{<sup>1</sup>H} NMR (101 MHz, CDCl<sub>3</sub>) δ 153.5, 135.7, 134.1, 130.2, 128.9, 127.6, 127.5, 126.6, 124.7, 119.3, 114.8, 69.0, 22.2.

**HRMS (ESI) m/z:** Calculated for C<sub>14</sub>H<sub>15</sub>NO<sub>2</sub> [M+Na]<sup>+</sup>: 252.0995, found: 252.1001.

**Mp:** 70-75°C.

### isopropyl naphthalen-1-ylcarbamate(3ta)

Obtained according to the **General procedure A** (120 °C /16 h), to give **3ta** as a pink solid (32 mg, 70% yield). Flash column chromatography (petroleum ether/ethyl



acetate, 30:1).  $R_f$  0.3 (petroleum ether/ethyl acetate, 10:1). Spectroscopic data are consistent with those previously reported.<sup>[12]</sup>

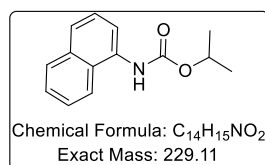

$^1H$  NMR (400 MHz,  $CDCl_3$ )  $\delta$  8.00 – 7.80 (m, 3H), 7.65 (d,  $J = 8.2$  Hz, 1H), 7.57 – 7.43 (m, 3H), 6.96 (s, 1H), 5.09 (hept,  $J = 6.3$  Hz, 1H), 1.35 (d,  $J = 6.3$  Hz, 6H).

$^{13}C\{^1H\}$  NMR (101 MHz,  $CDCl_3$ )  $\delta$  154.1, 134.1, 132.8, 128.8, 126.6, 126.1, 125.9, 125.9, 124.7, 120.5, 118.8, 69.1, 22.2.

### isopropyl (3-methyl-4-nitrophenyl)carbamate (3ua)

Obtained according to the **General procedure A** (120 °C /16 h), to give **3ua** as a yellow solid (24.5 mg, 51% yield). Flash column chromatography (petroleum ether/ethyl acetate, 15:1);  $R_f$  0.4 (petroleum ether/ethyl acetate, 10:1).

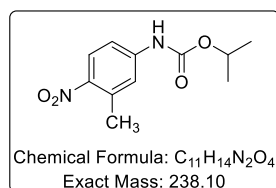

$^1H$  NMR (400 MHz,  $CDCl_3$ )  $\delta$  8.04 (d,  $J = 8.9$  Hz, 1H), 7.39 (s, 1H), 7.35 (dd,  $J = 8.9, 2.5$  Hz, 1H), 6.93 (s, 1H), 5.02 (hept,  $J = 6.3$  Hz, 1H), 2.61 (s, 3H), 1.30 (d,  $J = 6.3$  Hz, 6H).

$^{13}C\{^1H\}$  NMR (101 MHz,  $CDCl_3$ )  $\delta$  152.7, 143.6, 142.8, 136.4, 126.9, 121.0, 115.8, 69.8, 22.1, 21.6.

HRMS (ESI)  $m/z$ : Calculated for  $C_{11}H_{14}N_2O_4$  [ $M+Na$ ] $^+$ : 261.0846, found: 261.0847.

Mp: 102-108°C.

### methyl 3-((isopropoxycarbonyl)amino)thiophene-2-carboxylate (3va)

Obtained according to the **General procedure A** (120 °C /16 h), to give **3va** as a white solid (18.6 mg, 38% yield). Flash column chromatography (petroleum ether/ethyl acetate, 15:1);  $R_f$  0.3 (petroleum ether/ethyl acetate, 10:1). Spectroscopic data are consistent with those previously reported.<sup>[13]</sup>

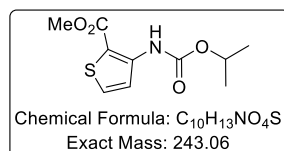

$^1H$  NMR (400 MHz,  $CDCl_3$ )  $\delta$  9.44 (s, 1H), 7.89 (d,  $J = 5.4$  Hz, 1H), 7.44 (d,  $J = 5.5$  Hz, 1H), 5.00 (hept,  $J = 6.3$  Hz, 1H), 3.87 (s, 3H), 1.30 (d,  $J = 6.2$  Hz, 6H).

$^{13}C\{^1H\}$  NMR (101 MHz,  $CDCl_3$ )  $\delta$  164.7, 152.8, 145.5, 131.7, 121.4, 108.5, 69.5, 52.0, 22.1.

### isopropyl cyclohexylcarbamate (3wa)

Obtained according to the **General procedure A** (120 °C /16 h), to give **3wa** as a white solid (27.3 mg, 74% yield). Flash column chromatography (petroleum ether/ethyl acetate, 10:1).  $R_f$  0.5 (petroleum ether/ethyl acetate, 10:1). Spectroscopic data are consistent with those previously reported.<sup>[14]</sup>

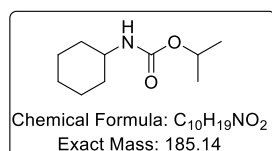

$^1H$  NMR (400 MHz,  $CDCl_3$ )  $\delta$  4.87 (h,  $J = 6.2$  Hz, 1H), 4.49 (s, 1H), 3.44 (s, 1H), 1.91 (d,  $J = 7.7$  Hz, 2H), 1.68 (dt,  $J = 13.4, 3.9$  Hz, 2H), 1.58 (dt,  $J = 12.8, 3.8$  Hz, 1H), 1.33 (dd,  $J = 14.3, 5.1$  Hz, 2H), 1.20 (d,  $J = 6.3$  Hz, 6H), 1.17 – 1.04 (m, 3H).

$^{13}C\{^1H\}$  NMR (101 MHz,  $CDCl_3$ )  $\delta$  155.6, 67.7, 49.7, 33.6, 25.6,

24.9, 22.3.

### isopropyl benzylcarbamate (3xa)

Obtained according to the **General procedure A** (120 °C /16 h), to give **3xa** as a white solid (18.6 mg, 48% yield). Flash column chromatography (petroleum ether/ethyl acetate, 10:1).  $R_f$  0.4 (petroleum ether/ethyl acetate, 10:1). Spectroscopic data are consistent with those previously reported.<sup>[15]</sup>

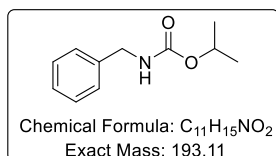

**<sup>1</sup>H NMR (400 MHz, CDCl<sub>3</sub>)**  $\delta$  7.37 – 7.25 (m, 5H), 4.98 – 4.90 (m, 2H), 4.36 (d,  $J$  = 5.9 Hz, 2H), 1.24 (d,  $J$  = 6.4 Hz, 6H).

**<sup>13</sup>C{<sup>1</sup>H} NMR (101 MHz, CDCl<sub>3</sub>)**  $\delta$  156.4, 138.8, 128.8, 127.7, 127.6, 68.4, 45.1, 22.3.

### Butyl phenylcarbamate (3ab)

Obtained according to the **General procedure A** (120 °C /16 h), to give **3ab** as a white solid (28.1 mg, 73% yield). Flash column chromatography (petroleum ether/ethyl acetate, 50:1);  $R_f$  0.7 (petroleum ether/ethyl acetate, 5:1). Spectroscopic data are consistent with those previously reported.<sup>[16]</sup>

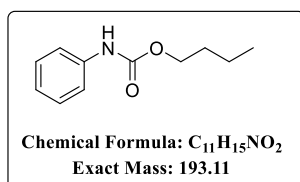

**<sup>1</sup>H NMR (400 MHz, CDCl<sub>3</sub>)**  $\delta$  7.38 (d,  $J$  = 8.0 Hz, 2H), 7.30 (t,  $J$  = 7.9 Hz, 2H), 7.06 (t,  $J$  = 7.2 Hz, 1H), 6.60 (s, 1H), 4.17 (t,  $J$  = 6.7 Hz, 2H), 1.66 (p,  $J$  = 6.9 Hz, 2H), 1.42 (h,  $J$  = 7.4 Hz, 2H), 0.96 (t,  $J$  = 7.4 Hz, 3H).

**<sup>13</sup>C{<sup>1</sup>H} NMR (101 MHz, CDCl<sub>3</sub>)**  $\delta$  153.8, 138.1, 129.2, 123.5, 118.7, 65.3, 31.1, 19.2, 13.9.

### 14.3.2-(trimethylsilyl)ethyl phenylcarbamate (3ac)

Obtained according to the **General procedure A** (120 °C /16 h), to give **3ac** as a yellow solid (39.9 mg, 84% yield). Flash column chromatography (petroleum ether/ethyl acetate, 30:1);  $R_f$  0.6 (petroleum ether/ethyl acetate, 5:1). Spectroscopic data are consistent with those previously reported.<sup>[17]</sup>

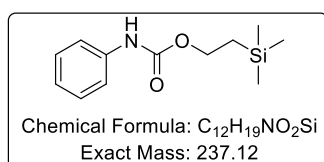

**<sup>1</sup>H NMR (400 MHz, CDCl<sub>3</sub>)**  $\delta$  7.33 (d,  $J$  = 8.0 Hz, 2H), 7.24 (t,  $J$  = 6.7 Hz, 2H), 6.99 (t,  $J$  = 7.3 Hz, 1H), 6.62 (s, 1H), 4.25 – 4.15 (m, 2H), 1.05 – 0.94 (m, 2H), 0.00 (d,  $J$  = 2.6 Hz, 9H).

**<sup>13</sup>C{<sup>1</sup>H} NMR (101 MHz, CDCl<sub>3</sub>)**  $\delta$  153.9, 138.1, 129.1, 123.4, 118.8, 63.6, 17.8, -1.4.

### Allyl phenylcarbamate (3ad)

Obtained according to the **General procedure A** (120 °C /16 h), to give **3ad** as a yellow solid (31.9 mg, 90% yield). Flash column chromatography (petroleum ether/ethyl acetate, 30:1);  $R_f$  0.6 (petroleum ether/ethyl acetate, 5:1). Spectroscopic data are consistent with those previously reported.<sup>[18]</sup>

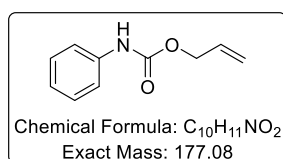

**<sup>1</sup>H NMR (400 MHz, CDCl<sub>3</sub>)**  $\delta$  7.40 (d,  $J$  = 8.0 Hz, 2H), 7.31 (t,  $J$  = 7.9 Hz, 2H), 7.07 (t,  $J$  = 7.3 Hz, 1H), 6.77 (s, 1H), 5.97 (ddt,  $J$  = 16.5, 11.0, 5.7 Hz, 1H), 5.37 (d,  $J$  = 17.2 Hz, 1H), 5.27 (d,  $J$  = 10.4 Hz, 1H), 4.67 (d,  $J$  = 5.7 Hz, 2H).

**<sup>13</sup>C{<sup>1</sup>H} NMR (101 MHz, CDCl<sub>3</sub>)**  $\delta$  153.4, 137.9, 132.5, 129.2, 123.6, 118.8, 118.4, 66.0.

### 2,2,2-trifluoroethyl phenylcarbamate (3ae)

Obtained according to the **General procedure A** (120 °C /16 h), to give **3ae** as a yellow solid (30.6 mg, 70% yield). Flash column chromatography (petroleum ether/ethyl acetate, 30:1);  $R_f$  0.6 (petroleum ether/ethyl acetate, 5:1). Spectroscopic data are consistent with those previously reported.<sup>[19]</sup>

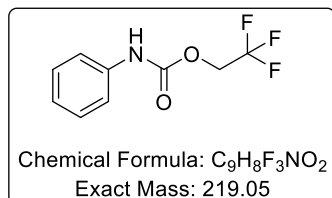

<sup>1</sup>H NMR (400 MHz, CDCl<sub>3</sub>) δ 7.40 – 7.31 (m, 4H), 7.12 (t,  $J$  = 7.1 Hz, 1H), 6.81 (s, 1H), 4.56 (q,  $J$  = 8.4 Hz, 2H).

<sup>13</sup>C{<sup>1</sup>H} NMR (101 MHz, CDCl<sub>3</sub>) δ 151.6, 137.0, 129.3, 124.4, 123.1 (q,  $J$  = 278.4 Hz), 119.1, 61.1 (q,  $J$  = 36.4 Hz).

### benzyl phenylcarbamate (3af)

Obtained according to the **General procedure A** (120 °C /16 h), to give **3af** as a yellow solid (42.7 mg, 94% yield). Flash column chromatography (petroleum ether/ethyl acetate, 30:1);  $R_f$  0.6 (petroleum ether/ethyl acetate, 5:1).

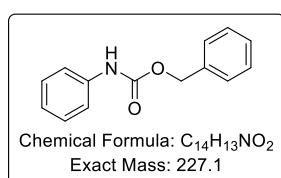

<sup>1</sup>H NMR (400 MHz, CDCl<sub>3</sub>) δ 7.43 – 7.27 (m, 9H), 7.07 (t,  $J$  = 7.4 Hz, 1H), 6.76 (s, 1H), 5.21 (s, 2H).

<sup>13</sup>C NMR (101 MHz, CDCl<sub>3</sub>) δ 153.5, 137.9, 136.1, 129.2, 128.7, 128.5, 128.4, 123.6, 118.8, 67.1.

HRMS (ESI)  $m/z$ : Calculated for C<sub>16</sub>H<sub>17</sub>NO<sub>2</sub> [M+Na]<sup>+</sup>: 250.0838, found: 250.0847.

Mp: 76–77 °C.

### Thiophen-2-ylmethyl phenylcarbamate (3ag)

Obtained according to the **General procedure A** (120 °C /16 h), to give **3ag** as a white solid (35.9 mg, 77% yield). Flash column chromatography (petroleum ether/ethyl acetate, 25:1);  $R_f$  0.4 (petroleum ether/ethyl acetate, 5:1). Spectroscopic data are consistent with those previously reported.<sup>[20]</sup>

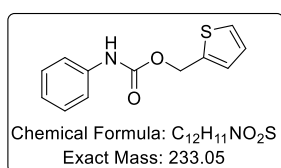

<sup>1</sup>H NMR (400 MHz, CDCl<sub>3</sub>) δ 7.40 (d,  $J$  = 8.0 Hz, 2H), 7.35 – 7.28 (m, 3H), 7.14 (d,  $J$  = 3.5 Hz, 1H), 7.12 – 7.05 (m, 1H), 7.01 (dd,  $J$  = 5.1, 3.6 Hz, 1H), 6.80 (s, 1H), 5.35 (s, 2H).

<sup>13</sup>C{<sup>1</sup>H} NMR (101 MHz, CDCl<sub>3</sub>) δ 153.2, 138.1, 137.7, 129.2, 128.4, 127.1, 127.0, 123.7, 118.8, 61.2.

### 1-phenylpropyl phenylcarbamate (3ah)

Obtained according to the **General procedure A** (120 °C /16 h), to give **3ah** as a colorless oil (40.5 mg, 79% yield). Flash column chromatography (petroleum ether/ethyl acetate, 50:1);  $R_f$  0.6 (petroleum ether/ethyl acetate, 5:1).

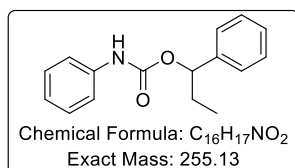

<sup>1</sup>H NMR (400 MHz, CDCl<sub>3</sub>) δ 7.42 – 7.34 (m, 6H), 7.34 – 7.27 (m, 3H), 7.06 (t,  $J$  = 7.3 Hz, 1H), 6.79 (s, 1H), 5.69 (t,  $J$  = 6.9 Hz, 1H), 2.00 (dq,  $J$  = 14.7, 7.3 Hz, 1H), 1.88 (dp,  $J$  = 14.2, 7.3 Hz, 1H), 0.95 (t,  $J$  = 7.4 Hz, 3H).

<sup>13</sup>C{<sup>1</sup>H} NMR (101 MHz, CDCl<sub>3</sub>) δ 153.1, 140.6, 138.0, 129.1, 128.5, 128.0, 126.6, 123.4, 118.6, 78.5, 29.5, 10.1.

**HRMS (ESI) m/z:** Calculated for C<sub>16</sub>H<sub>17</sub>NO<sub>2</sub> [M+Na]<sup>+</sup>: 278.1151, found: 278.1146.

### Cyclopentyl phenylcarbamate (3ai)

Obtained according to the **General procedure A** (120 °C /16 h), to give **3ai** as a white solid (37.4 mg, 91% yield). Flash column chromatography (petroleum ether/ethyl acetate, 25:1); R<sub>f</sub> 0.5 (petroleum ether/ethyl acetate, 5:1). Spectroscopic data are consistent with those previously reported.<sup>[21]</sup>

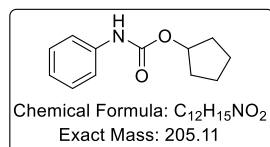

**<sup>1</sup>H NMR (400 MHz, CDCl<sub>3</sub>) δ** 7.39 (d, *J* = 8.1 Hz, 2H), 7.29 (t, *J* = 7.8 Hz, 2H), 7.05 (t, *J* = 7.3 Hz, 1H), 6.68 (s, 1H), 5.21 (tt, *J* = 6.1, 2.7 Hz, 1H), 1.88 (td, *J* = 12.3, 7.0 Hz, 2H), 1.82 – 1.70 (m, 4H), 1.67 – 1.57 (m, 2H).

**<sup>13</sup>C{<sup>1</sup>H} NMR (101 MHz, CDCl<sub>3</sub>) δ** 153.6, 138.2, 129.1, 123.3, 118.6, 78.1, 32.9, 23.8.

### Cyclooctyl phenylcarbamate (3aj)

Obtained according to the **General procedure A** (120 °C /16 h), to give **3aj** as a colorless oil (45.9 mg, 93% yield). Flash column chromatography (petroleum ether/ethyl acetate, 30:1); R<sub>f</sub> 0.5 (petroleum ether/ethyl acetate, 5:1).

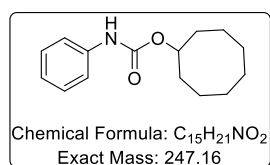

**<sup>1</sup>H NMR (400 MHz, CDCl<sub>3</sub>) δ** 7.39 (d, *J* = 8.1 Hz, 2H), 7.29 (t, *J* = 7.8 Hz, 2H), 7.04 (t, *J* = 7.3 Hz, 1H), 6.68 (s, 1H), 4.95 (tt, *J* = 8.4, 3.9 Hz, 1H), 1.94 – 1.55 (m, 14H).

**<sup>13</sup>C{<sup>1</sup>H} NMR (101 MHz, CDCl<sub>3</sub>) δ** 153.4, 138.3, 129.1, 123.2, 118.6, 76.2, 31.7, 27.2, 25.5, 23.0.

**HRMS (ESI) m/z:** Calculated for C<sub>15</sub>H<sub>21</sub>NO<sub>2</sub> [M+Na]<sup>+</sup>: 270.1464, found: 270.1465.

### (1R,3S,5r,7r)-adamantan-2-yl phenylcarbamate (3ak)

Obtained according to the **General procedure A** (120 °C /16 h), to give **3ak** as a white solid (39.8 mg, 73% yield). Flash column chromatography (petroleum ether/ethyl acetate, 50:1); R<sub>f</sub> 0.7 (petroleum ether/ethyl acetate, 5:1). Spectroscopic data are consistent with those previously reported.<sup>[22]</sup>

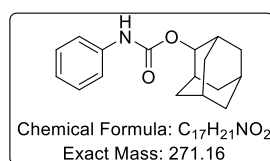

**<sup>1</sup>H NMR (400 MHz, CDCl<sub>3</sub>) δ** 7.41 (d, *J* = 8.0 Hz, 2H), 7.30 (t, *J* = 7.7 Hz, 2H), 7.05 (t, *J* = 7.4 Hz, 1H), 6.75 (s, 1H), 4.93 (d, *J* = 3.6 Hz, 1H), 2.11 – 2.01 (m, 4H), 1.87 – 1.73 (m, 8H), 1.59 (d, *J* = 12.4 Hz, 2H).

**<sup>13</sup>C{<sup>1</sup>H} NMR (101 MHz, CDCl<sub>3</sub>) δ** 153.4, 138.3, 129.1, 123.3, 118.6, 78.1, 37.5, 36.4, 32.1, 31.9, 27.3, 27.1.

### Tetrahydro-2H-pyran-3-yl phenylcarbamate (3al)

Obtained according to the **General procedure A** (120 °C /16 h), to give **3al** as a white solid (38 mg, 86% yield). Flash column chromatography (petroleum ether/ethyl acetate, 50:1); R<sub>f</sub> 0.7 (petroleum ether/ethyl acetate, 5:1).

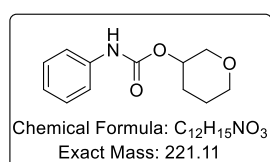

**<sup>1</sup>H NMR (400 MHz, CDCl<sub>3</sub>) δ** 7.38 (d, *J* = 8.0 Hz, 2H), 7.30 (t, *J* = 7.9 Hz, 2H), 7.06 (t, *J* = 7.3 Hz, 1H), 6.87 (s, 1H), 4.83 (td, *J* = 5.5, 2.8 Hz, 1H), 3.83 – 3.60 (m, 4H), 2.00 – 1.83 (m, 3H), 1.62 – 1.54 (m, 1H).

$^{13}\text{C}\{^1\text{H}\}$  NMR (101 MHz,  $\text{CDCl}_3$ )  $\delta$  153.0, 137.9, 129.2, 123.6, 118.7, 70.1, 68.8, 68.0, 28.2, 22.7.

HRMS (ESI)  $m/z$ : Calculated for  $\text{C}_{12}\text{H}_{15}\text{NO}_3$   $[\text{M}+\text{Na}]^+$ : 244.0944, found: 244.0945.

Mp: 122-127°C.

### 1,3-dimethoxypropan-2-yl phenylcarbamate (3am)

Obtained according to the **General procedure A** (120 °C /16 h), to give **3am** as a yellow oil (39.2 mg, 82% yield). Flash column chromatography (petroleum ether/ethyl acetate, 10:1 to 2:1);  $R_f$  0.2 (petroleum ether/ethyl acetate, 5:1).

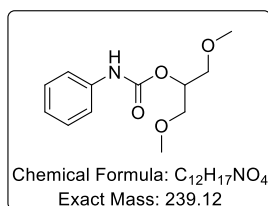

$^1\text{H}$  NMR (400 MHz,  $\text{CDCl}_3$ )  $\delta$  7.37 (d,  $J = 7.3$  Hz, 2H), 7.32 – 7.25 (m, 2H), 7.05 (t,  $J = 7.4$  Hz, 1H), 6.93 (s, 1H), 5.13 (p,  $J = 4.9$  Hz, 1H), 3.62 (d,  $J = 4.9$  Hz, 4H), 3.39 (s, 6H).

$^{13}\text{C}\{^1\text{H}\}$  NMR (101 MHz,  $\text{CDCl}_3$ )  $\delta$  152.8, 137.9, 129.2, 123.6, 118.6, 72.1, 71.4, 59.4.

HRMS (ESI)  $m/z$ : Calculated for  $\text{C}_{12}\text{H}_{17}\text{NO}_4$   $[\text{M}+\text{Na}]^+$ : 262.1050, found: 262.1095.

### Tert-butyl phenylcarbamate (3an)

Obtained according to the **General procedure A** (120 °C /16 h), to give **3an** as a white solid (25.7 mg, 67% yield). Flash column chromatography (petroleum ether/ethyl acetate, 50:1);  $R_f$  0.6 (petroleum ether/ethyl acetate, 10:1). Spectroscopic data are consistent with those previously reported.<sup>[23]</sup>

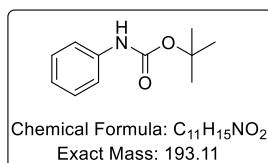

$^1\text{H}$  NMR (400 MHz,  $\text{CDCl}_3$ )  $\delta$  7.36 (d,  $J = 8.0$  Hz, 2H), 7.29 (t,  $J = 7.9$  Hz, 2H), 7.03 (t,  $J = 7.3$  Hz, 1H), 6.51 (s, 1H), 1.52 (s, 9H).

$^{13}\text{C}\{^1\text{H}\}$  NMR (101 MHz,  $\text{CDCl}_3$ )  $\delta$  152.9, 138.4, 129.1, 123.1, 118.6, 80.6, 28.5.

### Tert-pentyl phenylcarbamate (3ao)

Obtained according to the **General procedure A** (120 °C /16 h), to give **3ao** as a white solid (18.6 mg, 49% yield). Flash column chromatography (petroleum ether/ethyl acetate, 30:1);  $R_f$  0.5 (petroleum ether/ethyl acetate, 10:1). Spectroscopic data are consistent with those previously reported.<sup>[24]</sup>

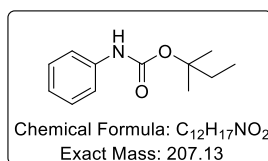

$^1\text{H}$  NMR (400 MHz,  $\text{CDCl}_3$ )  $\delta$  7.37 (s, 2H), 7.28 (dd,  $J = 8.7, 7.2$  Hz, 2H), 7.03 (tt,  $J = 7.2, 1.3$  Hz, 1H), 6.52 (s, 1H), 1.85 (q,  $J = 7.5$  Hz, 2H), 1.49 (s, 6H), 0.93 (t,  $J = 7.5$  Hz, 3H).

$^{13}\text{C}\{^1\text{H}\}$  NMR (101 MHz,  $\text{CDCl}_3$ )  $\delta$  152.8, 138.5, 129.1, 123.1, 118.6, 83.1, 33.7, 25.9, 8.4.

### 3-methylpentan-3-yl phenylcarbamate (3ap)

Obtained according to the **General procedure A** (120 °C /16 h), to give **3ap** as a yellow oil (17.1 mg, 38% yield). Flash column chromatography (petroleum ether/ethyl acetate, 30:1);  $R_f$  0.5 (petroleum ether/ethyl acetate, 10:1).

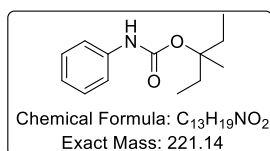

<sup>1</sup>H NMR (400 MHz, CDCl<sub>3</sub>) δ 7.36 (d, *J* = 8.0 Hz, 2H), 7.28 (t, *J* = 8.0 Hz, 2H), 7.03 (t, *J* = 7.2 Hz, 1H), 6.52 (s, 1H), 1.94 (dq, *J* = 14.9, 7.5 Hz, 2H), 1.81 (dq, *J* = 14.6, 7.4 Hz, 2H), 1.44 (s, 3H), 0.91 (t, *J* = 7.5 Hz, 6H).

<sup>13</sup>C{<sup>1</sup>H} NMR (101 MHz, CDCl<sub>3</sub>) δ 152.7, 138.5, 129.1, 123.1, 118.6, 85.7, 30.8, 23.2, 8.2.

HRMS (ESI) *m/z*: Calculated for C<sub>13</sub>H<sub>19</sub>NO<sub>2</sub> [M+Na]<sup>+</sup>: 244.1308, found: 244.1298.

### 1-methylcyclopentyl phenylcarbamate (3aq)

Obtained according to the *General procedure A* (120 °C /16 h), to give **3aq** as a yellow solid (20.2 mg, 46% yield). Flash column chromatography (petroleum ether/ethyl acetate, 30:1); R<sub>f</sub> 0.5 (petroleum ether/ethyl acetate, 10:1). Spectroscopic data are consistent with those previously reported.<sup>[25]</sup>

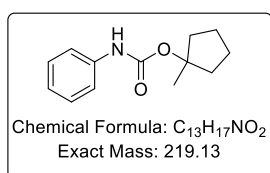

<sup>1</sup>H NMR (400 MHz, CDCl<sub>3</sub>) δ 7.36 (d, *J* = 8.0 Hz, 2H), 7.29 (t, *J* = 8.0 Hz, 2H), 7.03 (t, *J* = 7.3 Hz, 1H), 6.51 (s, 1H), 2.24 – 2.13 (m, 2H), 1.81 – 1.64 (m, 6H), 1.63 (s, 3H).

<sup>13</sup>C{<sup>1</sup>H} NMR (101 MHz, DMSO) δ 152.9, 139.5, 128.6, 122.0, 118.0, 88.4, 38.8, 24.4, 23.3.

### 1-methylcyclohexyl phenylcarbamate (3ar)

Obtained according to the *General procedure A* (120 °C /16 h), to give **3ar** as a yellow solid (19.4 mg, 41% yield). Flash column chromatography (petroleum ether/ethyl acetate, 30:1); R<sub>f</sub> 0.5 (petroleum ether/ethyl acetate, 10:1).

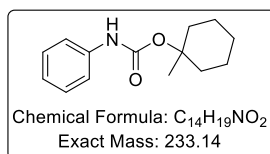

<sup>1</sup>H NMR (400 MHz, CDCl<sub>3</sub>) δ 7.37 (d, *J* = 8.0 Hz, 2H), 7.29 (t, *J* = 7.9 Hz, 2H), 7.03 (t, *J* = 7.3 Hz, 1H), 6.54 (s, 1H), 2.18 (d, *J* = 13.3 Hz, 2H), 1.61 – 1.40 (m, 11H).

<sup>13</sup>C{<sup>1</sup>H} NMR (101 MHz, CDCl<sub>3</sub>) δ 152.8, 138.5, 129.1, 123.1, 118.6, 76.8, 37.0, 25.9, 25.5, 22.3.

HRMS (ESI) *m/z*: Calculated for C<sub>14</sub>H<sub>19</sub>NO<sub>2</sub> [M+Na]<sup>+</sup>: 256.1308, found: 256.1310.

Mp: 104-106 °C.

### 1-methylcycloheptyl phenylcarbamate (3as)

Obtained according to the *General procedure A* (120 °C /16 h), to give **3as** as a yellow solid (16.8 mg, 34% yield). Flash column chromatography (petroleum ether/ethyl acetate, 30:1); R<sub>f</sub> 0.5 (petroleum ether/ethyl acetate, 10:1).

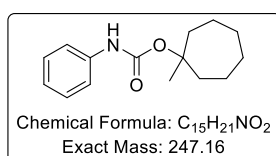

<sup>1</sup>H NMR (400 MHz, CDCl<sub>3</sub>) δ 7.36 (d, *J* = 8.0 Hz, 2H), 7.28 (t, *J* = 7.9 Hz, 2H), 7.03 (t, *J* = 7.3 Hz, 1H), 6.51 (s, 1H), 2.18 (dd, *J* = 14.5, 8.6 Hz, 2H), 1.80 (dd, *J* = 14.7, 9.9 Hz, 2H), 1.68 – 1.59 (m, 4H), 1.57 (s, 3H), 1.56 – 1.50 (m, 2H), 1.45 (q, *J* = 7.5 Hz, 2H).

<sup>13</sup>C{<sup>1</sup>H} NMR (101 MHz, CDCl<sub>3</sub>) δ 152.9, 138.5, 129.1, 123.1,

118.6, 86.6, 40.5, 29.7, 27.3, 22.8.

HRMS (ESI) *m/z*: Calculated for C<sub>15</sub>H<sub>21</sub>NO<sub>2</sub> [M+Na]<sup>+</sup>: 270.1465, found: 270.1453.

Mp: 62-65 °C.

### 3,7-dimethyloct-6-en-1-yl phenylcarbamate (**3at**)

Obtained according to the **General procedure A** (120 °C /16 h), to give **3at** as a white oil (54.5 mg, 99% yield). Flash column chromatography (petroleum ether/ethyl acetate, 25:1);  $R_f$  0.4 (petroleum ether/ethyl acetate, 5:1).

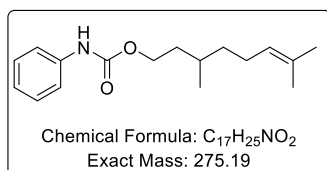

<sup>1</sup>H NMR (400 MHz, CDCl<sub>3</sub>)  $\delta$  7.39 (d,  $J$  = 8.1 Hz, 2H), 7.34 – 7.27 (m, 2H), 7.06 (t,  $J$  = 7.3 Hz, 1H), 6.73 (s, 1H), 5.10 (t,  $J$  = 7.1 Hz, 1H), 4.27 – 4.15 (m, 2H), 2.00 (dp,  $J$  = 23.6, 7.5 Hz, 2H), 1.74 (dd,  $J$  = 11.9, 6.6 Hz, 1H), 1.69 (s, 3H), 1.61 (s, 3H), 1.60 – 1.54 (m, 1H), 1.48 (td,  $J$  = 13.4, 7.5 Hz, 1H), 1.43 – 1.33 (m, 1H), 1.27 – 1.15 (m, 1H), 0.94 (d,  $J$  = 6.6 Hz, 3H).

<sup>13</sup>C{<sup>1</sup>H} NMR (101 MHz, CDCl<sub>3</sub>)  $\delta$  153.8, 138.1, 131.5, 129.2, 124.7, 123.5, 118.7, 63.9, 37.1, 35.9, 29.5, 25.9, 25.5, 19.5, 17.8.

HRMS (ESI)  $m/z$ : Calculated for C<sub>17</sub>H<sub>25</sub>NO<sub>2</sub> [M+Na]<sup>+</sup>: 289.1778, found: 298.1770.

### (3S,8R,9S,10R,13S,14S)-10,13-dimethyl-17-oxo-2,3,4,7,8,9,10,11,12,13,14,15,16,17-tetradecahydro-1H-cyclopenta[a]phenanthren-3-yl phenylcarbamate (**3au**)

Obtained according to the **General procedure A** (120 °C /16 h), to give **3au** as a white solid (65.2 mg, 80% yield). Flash column chromatography (petroleum ether/ethyl acetate, 30:1);  $R_f$  0.5 (petroleum ether/ethyl acetate, 10:1).

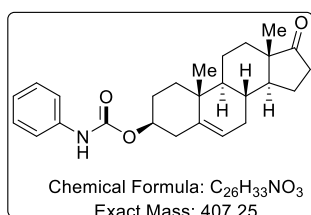

<sup>1</sup>H NMR (400 MHz, CDCl<sub>3</sub>)  $\delta$  7.39 (d,  $J$  = 8.0 Hz, 2H), 7.33 – 7.23 (m, 2H), 7.04 (t,  $J$  = 7.3 Hz, 1H), 6.81 (s, 1H), 5.42 (d,  $J$  = 5.1 Hz, 1H), 4.60 (td,  $J$  = 11.5, 5.8 Hz, 1H), 2.52 – 2.40 (m, 2H), 2.34 (t,  $J$  = 11.0 Hz, 1H), 2.10 (dt,  $J$  = 19.0, 9.1 Hz, 2H), 1.97 (d,  $J$  = 13.3 Hz, 2H), 1.92 – 1.83 (m, 2H), 1.73 – 1.58 (m, 4H), 1.59 – 1.42 (m, 2H), 1.35 – 1.22 (m, 3H), 1.17 (td,  $J$  = 13.7, 3.7 Hz, 1H), 1.05 (s, 3H), 0.89 (s, 3H).

<sup>13</sup>C{<sup>1</sup>H} NMR (101 MHz, CDCl<sub>3</sub>)  $\delta$  221.2, 153.1, 139.9, 138.1, 129.1, 123.4, 122.1, 118.7, 74.7, 51.8, 50.2, 47.6, 38.5, 36.8, 35.9, 31.6, 31.5, 30.9, 29.8, 28.1, 21.9, 20.4, 19.5, 13.7.

HRMS (ESI)  $m/z$ : Calculated for C<sub>26</sub>H<sub>33</sub>NO<sub>3</sub> [M+Na]<sup>+</sup>: 430.2353, found: 430.2351.

Mp: 223–228 °C.

### (4S,5'R,6aR,6bS,8aS,8bR,9S,10R,11aS,12aS,12bS)-5',6a,8a,9-tetramethyl-1,3,3',4,4',5,5',6,6a,6b,6',7,8,8a,8b,9,11a,12,12a,12b-icosahydrospiro[naphtho[2',1':4,5]indeno[2,1-b]furan-10,2'-pyran]-4-yl phenylcarbamate (**3av**)

Obtained according to the **General procedure A** (120 °C /16 h), to give **3av** as a white solid (64 mg, 60% yield). Flash column chromatography (petroleum ether/ethyl acetate, 30:1);  $R_f$  0.5 (petroleum ether/ethyl acetate, 10:1).

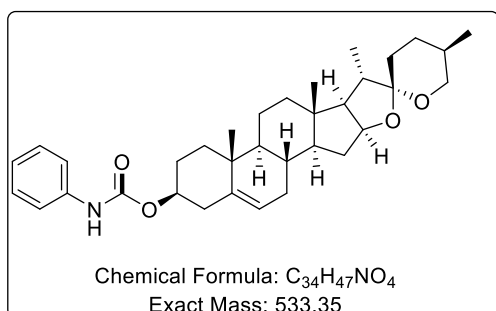

<sup>1</sup>H NMR (400 MHz, CDCl<sub>3</sub>) δ 7.38 (d, *J* = 8.1 Hz, 2H), 7.29 (dd, *J* = 8.6, 7.2 Hz, 2H), 7.04 (t, *J* = 7.3 Hz, 1H), 6.71 (s, 1H), 5.39 (d, *J* = 5.4 Hz, 1H), 4.59 (td, *J* = 11.5, 5.7 Hz, 1H), 4.42 (q, *J* = 7.6 Hz, 1H), 3.48 (dd, *J* = 10.0, 5.3 Hz, 1H), 3.38 (t, *J* = 10.9 Hz, 1H), 2.44 (dd, *J* = 13.0, 2.9 Hz, 1H), 2.33 (t, *J* = 11.0 Hz, 1H), 1.98 (td, *J* = 13.1, 5.8 Hz, 3H), 1.91 – 1.83 (m, 2H), 1.82 – 1.74 (m, 2H), 1.67 – 1.57 (m, 6H), 1.54 – 1.40

(m, 3H), 1.35 – 1.20 (m, 3H), 1.20 – 1.08 (m, 3H), 1.04 (s, 3H), 0.98 (d, *J* = 6.9 Hz, 3H), 0.79 (d, *J* = 6.6 Hz, 6H).

<sup>13</sup>C{<sup>1</sup>H} NMR (101 MHz, CDCl<sub>3</sub>) δ 153.2, 139.7, 138.1, 129.2, 123.4, 122.6, 118.6, 109.4, 80.9, 74.9, 67.0, 62.2, 56.5, 50.0, 41.7, 40.4, 39.8, 38.5, 37.1, 36.8, 32.2, 32.0, 31.5, 31.5, 30.4, 28.9, 28.2, 20.9, 19.5, 17.3, 16.4, 14.7.

HRMS (ESI) *m/z*: Calculated for C<sub>34</sub>H<sub>47</sub>NO<sub>4</sub> [M+H]<sup>+</sup>: 534.3578, found: 534.3551.

Mp: 210-214 °C.

#### (1R,2S,5R)-2-isopropyl-5-methylcyclohexyl phenylcarbamate (**3aw**)

Obtained according to the **General procedure A** (120 °C /16 h), to give **3aw** as a white solid (54.5 mg, 99% yield). Flash column chromatography (petroleum ether/ethyl acetate, 30:1); R<sub>f</sub> 0.5 (petroleum ether/ethyl acetate, 5:1). Spectroscopic data are consistent with those previously reported.<sup>[26]</sup>

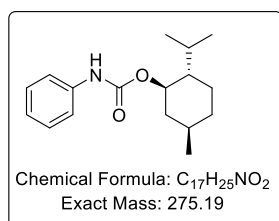

<sup>1</sup>H NMR (400 MHz, CDCl<sub>3</sub>) δ 7.41 (d, *J* = 8.0 Hz, 2H), 7.30 (t, *J* = 8.0 Hz, 2H), 7.05 (t, *J* = 7.4 Hz, 1H), 6.69 (s, 1H), 4.67 (td, *J* = 10.9, 4.4 Hz, 1H), 2.11 (d, *J* = 11.9 Hz, 1H), 1.99 (dq, *J* = 9.6, 7.0, 3.6 Hz, 1H), 1.69 (d, *J* = 12.1 Hz, 2H), 1.49 (ddt, *J* = 15.3, 9.4, 4.6 Hz, 1H), 1.44 – 1.23 (m, 2H), 1.15 – 0.98 (m, 2H), 0.92 (d, *J* = 6.8 Hz, 6H), 0.82 (d, *J* = 6.9 Hz, 3H).

<sup>13</sup>C{<sup>1</sup>H} NMR (101 MHz, CDCl<sub>3</sub>) δ 153.5, 138.3, 129.1, 123.3, 118.6, 75.2, 47.4, 41.5, 34.4, 31.5, 26.4, 23.6, 22.1, 20.9, 16.5.

#### Butyl 2-(methylamino)benzoate (**5ab**)

Obtained according to the **General procedure B** (0.2 mmol scale), to give **5ab** as a yellow oil (23.8 mg, 58% yield). Flash column chromatography (petroleum ether/ethyl acetate, 200:1); R<sub>f</sub> 0.6 (petroleum ether/ethyl acetate, 10:1). Spectroscopic data are consistent with those previously reported.<sup>[27]</sup>

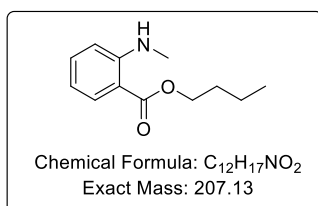

<sup>1</sup>H NMR (400 MHz, CDCl<sub>3</sub>) δ 7.91 (dd, *J* = 8.0, 1.7 Hz, 1H), 7.67 (s, 1H), 7.40 – 7.36 (m, 1H), 6.66 (d, *J* = 7.5 Hz, 1H), 6.59 (t, *J* = 7.6 Hz, 1H), 4.26 (t, *J* = 6.6 Hz, 2H), 2.91 (d, *J* = 5.0 Hz, 3H), 1.79 – 1.69 (m, 2H), 1.52 – 0.99 (m, 2H), 0.98 (t, *J* = 7.4 Hz, 3H).

<sup>13</sup>C{<sup>1</sup>H} NMR (101 MHz, CDCl<sub>3</sub>) δ 168.9, 152.2, 134.7, 131.6, 114.4, 110.8, 110.3, 64.2, 31.0, 29.7, 19.5, 13.9.



### Butyl 2-(ethylamino)benzoate (5bb)

Obtained according to the **General procedure B** (0.2 mmol scale), to give **5bb** as a yellow oil (13.7 mg, 31% yield). Flash column chromatography (petroleum ether/ethyl acetate, 200:1);  $R_f$  0.6 (petroleum ether/ethyl acetate, 10:1).

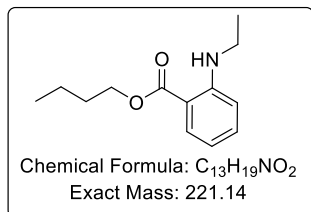

<sup>1</sup>H NMR (400 MHz, CDCl<sub>3</sub>)  $\delta$  7.91 (dd,  $J$  = 8.0, 1.7 Hz, 1H), 7.62 (s, 1H), 7.37 – 7.33 (m, 1H), 6.67 (d,  $J$  = 8.5 Hz, 1H), 6.61 – 6.52 (m, 1H), 4.26 (t,  $J$  = 6.6 Hz, 2H), 3.28 – 3.18 (m, 2H), 1.79 – 1.69 (m, 2H), 1.52 – 1.36 (m, 2H), 1.32 (t,  $J$  = 7.2 Hz, 3H), 0.98 (t,  $J$  = 7.4 Hz, 3H).

<sup>13</sup>C{H} NMR (101 MHz, DMSO)  $\delta$  167.8, 150.6, 134.9, 131.1, 114.3, 111.4, 109.1, 63.7, 36.7, 30.3, 18.9, 14.4, 13.7.

HRMS (ESI)  $m/z$ : Calculated for C<sub>13</sub>H<sub>19</sub>NO<sub>2</sub> [M+Na]<sup>+</sup>: 244.1308, found: 244.1322.

### Butyl 2-(isopropylamino)benzoate (5cb)

Obtained according to the **General procedure B** (0.2 mmol scale), to give **5cb** as a yellow oil (8.9 mg, 19% yield). Flash column chromatography (petroleum ether/ethyl acetate, 200:1);  $R_f$  0.6 (petroleum ether/ethyl acetate, 10:1).

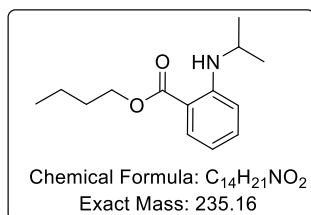

<sup>1</sup>H NMR (400 MHz, CDCl<sub>3</sub>)  $\delta$  7.91 (d,  $J$  = 8.1 Hz, 1H), 7.68 (d,  $J$  = 7.3 Hz, 1H), 7.38 – 7.29 (m, 1H), 6.69 (d,  $J$  = 8.5 Hz, 1H), 6.59 – 6.50 (m, 1H), 4.25 (t,  $J$  = 6.6 Hz, 2H), 3.72 (h,  $J$  = 6.5 Hz, 1H), 1.79 – 1.68 (m, 2H), 1.48 (p,  $J$  = 7.4 Hz, 2H), 1.27 (d,  $J$  = 6.4 Hz, 6H), 0.97 (t,  $J$  = 7.4 Hz, 3H).

<sup>13</sup>C{H} NMR (101 MHz, DMSO)  $\delta$  167.9, 149.9, 134.8, 131.2, 114.1, 111.9, 109.0, 63.7, 42.6, 30.3, 22.5, 18.9, 13.6.

HRMS (ESI)  $m/z$ : Calculated for C<sub>14</sub>H<sub>21</sub>NO<sub>2</sub> [M+Na]<sup>+</sup>: 258.1465, found: 258.1461.

### Butyl indoline-7-carboxylate (5db)

Obtained according to the **General procedure B** (0.2 mmol scale), to give **5db** as a yellow oil (7 mg, 16% yield). Flash column chromatography (petroleum ether/ethyl acetate, 150:1);  $R_f$  0.6 (petroleum ether/ethyl acetate, 10:1).

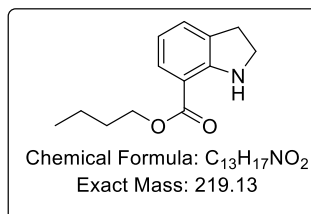

<sup>1</sup>H NMR (400 MHz, CDCl<sub>3</sub>)  $\delta$  7.56 (d,  $J$  = 8.1 Hz, 1H), 7.16 (d,  $J$  = 7.1 Hz, 1H), 6.59 – 6.52 (m, 1H), 6.08 (s, 1H), 4.27 (t,  $J$  = 6.6 Hz, 2H), 3.71 (t,  $J$  = 8.5 Hz, 2H), 3.05 (t,  $J$  = 8.5 Hz, 2H), 1.77 – 1.69 (m, 2H), 1.50 – 1.43 (m, 2H), 0.97 (t,  $J$  = 7.4 Hz, 3H).

<sup>13</sup>C{H} NMR (101 MHz, DMSO)  $\delta$  166.5, 154.1, 131.3, 128.4, 127.3, 115.3, 106.8, 63.4, 46.4, 30.4, 27.8, 18.8, 13.7.

HRMS (ESI)  $m/z$ : Calculated for C<sub>13</sub>H<sub>17</sub>NO<sub>2</sub> [M+H]<sup>+</sup>: 220.1332, found: 220.1331.

### Butyl 1,2,3,4-tetrahydroquinoline-8-carboxylate (5eb)

Obtained according to the **General procedure B** (0.2 mmol scale), to give **5eb** as a yellow oil (28.9 mg, 62% yield). Flash column chromatography (petroleum ether/ethyl acetate, 150:1);  $R_f$  0.6 (petroleum ether/ethyl acetate, 10:1).

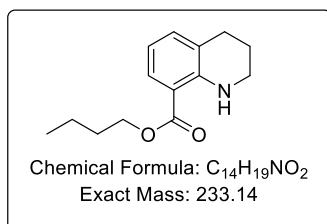

$^1H$  NMR (400 MHz,  $CDCl_3$ )  $\delta$  7.80 (s, 1H), 7.72 (d,  $J = 8.1$  Hz, 1H), 7.03 (d,  $J = 7.1$  Hz, 1H), 6.44 (t,  $J = 7.6$  Hz, 1H), 4.24 (t,  $J = 6.6$  Hz, 2H), 3.49 – 3.36 (m, 2H), 2.78 (t,  $J = 6.3$  Hz, 2H), 1.90 (p,  $J = 6.1$  Hz, 2H), 1.80 – 1.67 (m, 2H), 1.47 (h,  $J = 7.4$  Hz, 2H), 0.97 (t,  $J = 7.4$  Hz, 3H).

$^{13}C\{H\}$  NMR (101 MHz,  $CDCl_3$ )  $\delta$  169.0, 148.5, 133.8, 129.5, 122.1, 113.6, 108.8, 64.0, 41.30, 31.0, 27.9, 20.9, 19.5, 13.9.

HRMS (ESI)  $m/z$ : Calculated for  $C_{14}H_{19}NO_2$   $[M+H]^+$ : 256.1308, found: 256.1295.

### Butyl 2,3,4,5-tetrahydro-1H-benzo[b]azepine-9-carboxylate (5fb)

Obtained according to the **General procedure B** (0.2 mmol scale), to give **5fb** as a yellow oil (34.5 mg, 70% yield). Flash column chromatography (petroleum ether/ethyl acetate, 150:1);  $R_f$  0.6 (petroleum ether/ethyl acetate, 10:1).

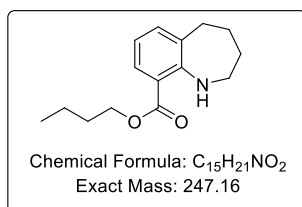

$^1H$  NMR (400 MHz,  $CDCl_3$ )  $\delta$  7.80 (dd,  $J = 8.0, 1.7$  Hz, 1H), 7.76 (s, 1H), 7.20 (d,  $J = 7.3$  Hz, 1H), 6.67 (t,  $J = 7.6$  Hz, 1H), 4.26 (t,  $J = 6.6$  Hz, 2H), 3.21 (t,  $J = 5.4$  Hz, 2H), 2.87 – 2.76 (m, 2H), 1.86 – 1.78 (m, 2H), 1.78 – 1.70 (m, 4H), 1.48 (dq,  $J = 14.6, 7.3$  Hz, 2H), 0.98 (t,  $J = 7.4$  Hz, 3H).

$^{13}C\{H\}$  NMR (101 MHz,  $CDCl_3$ )  $\delta$  169.1, 154.7, 135.8, 133.5, 129.4, 117.7, 115.1, 64.5, 46.9, 35.5, 30.9, 30.4, 26.3, 19.4, 13.9.

HRMS (ESI)  $m/z$ : Calculated for  $C_{15}H_{21}NO_2$   $[M+H]^+$ : 248.1645, found: 248.1617.

### Butyl 3,4-dihydro-2H-benzo[b][1,4]oxazine-5-carboxylate (5gb)

Obtained according to the **General procedure B** (0.2 mmol scale), to give **5gb** as a yellow oil (33 mg, 70% yield). Flash column chromatography (petroleum ether/ethyl acetate, 150:1);  $R_f$  0.6 (petroleum ether/ethyl acetate, 10:1).

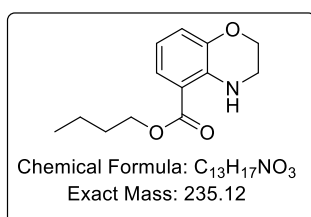

$^1H$  NMR (400 MHz,  $CDCl_3$ )  $\delta$  7.50 (s, 1H), 7.50-7.48 (m, 1H), 6.89 (d,  $J = 6.2$  Hz, 1H), 6.50 (t,  $J = 7.9$  Hz, 1H), 4.25 (t,  $J = 6.5$  Hz, 2H), 4.23 – 4.19 (m, 2H), 3.53 (td,  $J = 4.5, 2.5$  Hz, 2H), 1.76z – 1.69 (m, 2H), 1.51 – 1.42 (m, 2H), 0.97 (t,  $J = 7.4$  Hz, 3H).

$^{13}C\{H\}$  NMR (101 MHz,  $CDCl_3$ )  $\delta$  168.7, 143.5, 138.8, 123.8, 120.2, 114.8, 110.9, 64.3, 64.1, 40.0, 30.9, 19.4, 13.9.

HRMS (ESI)  $m/z$ : Calculated for  $C_{13}H_{17}NO_3$   $[M+H]^+$ : 236.1281, found: 236.1273.

### Isopropyl 2-(methylamino)benzoate (5aa)

Obtained according to the **General procedure B** (0.2 mmol scale), to give **5aa** as a colorless oil (11.2 mg, 29% yield). Flash column chromatography (petroleum ether/ethyl acetate, 100:1);  $R_f$  0.6 (petroleum ether/ethyl acetate, 10:1). Spectroscopic data are consistent with those previously reported.<sup>[27]</sup>

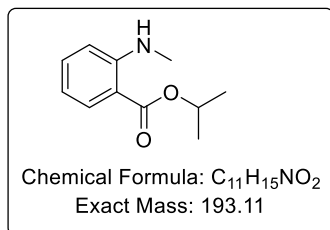

**<sup>1</sup>H NMR (400 MHz, CDCl<sub>3</sub>)** δ 7.91 (dd, *J* = 8.0, 1.7 Hz, 1H), 7.69 (s, 1H), 7.40 – 7.35 (m, 1H), 6.66 (d, *J* = 8.5 Hz, 1H), 6.62 – 6.51 (m, 1H), 5.19 (p, *J* = 6.2 Hz, 1H), 2.97 – 2.86 (m, 3H), 1.35 (d, *J* = 6.2 Hz, 6H).

**<sup>13</sup>C{<sup>1</sup>H} NMR (101 MHz, CDCl<sub>3</sub>)** δ 168.4, 152.1, 134.6, 131.7, 114.3, 110.7, 110.6, 67.6, 29.7, 22.1.

### Cyclopentyl 2-(methylamino)benzoate (5ai)

Obtained according to the **General procedure B** (0.2 mmol scale), to give **5ai** as a colorless oil (13.1 mg, 30% yield). Flash column chromatography (petroleum ether/ethyl acetate, 150:1); R<sub>f</sub> 0.6 (petroleum ether/ethyl acetate, 10:1).

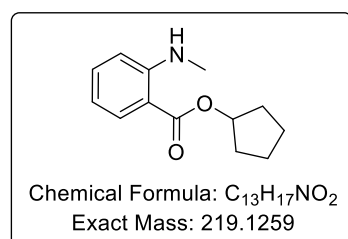

**<sup>1</sup>H NMR (400 MHz, CDCl<sub>3</sub>)** δ 7.87 (dd, *J* = 8.0, 1.7 Hz, 1H), 7.69 (s, 1H), 7.39 – 7.35 (m, 1H), 6.65 (d, *J* = 8.4 Hz, 1H), 6.60 – 6.56 (m, 1H), 5.36 – 5.31 (m, 1H), 2.90 (d, *J* = 3.4 Hz, 3H), 1.97 – 1.88 (m, 2H), 1.86 – 1.74 (m, 4H), 1.70 – 1.61 (m, 2H).

**<sup>13</sup>C{<sup>1</sup>H} NMR (101 MHz, CDCl<sub>3</sub>)** δ 168.7, 152.1, 134.6, 131.7, 114.3, 110.8, 110.6, 77.1, 32.9, 29.7, 24.0.

**HRMS (ESI) m/z:** Calculated for C<sub>13</sub>H<sub>17</sub>NO<sub>2</sub> [M+H]<sup>+</sup>: 220.1332, found: 220.1331.

### Isopropyl 2,3,4,5-tetrahydro-1H-benzo[b]azepine-9-carboxylate (5fa)

Obtained according to the **General procedure B** (0.2 mmol scale), to give **5fa** as a yellow oil (42 mg, 90% yield). Flash column chromatography (petroleum ether/ethyl acetate, 150:1); R<sub>f</sub> 0.8 (petroleum ether/ethyl acetate, 10:1).

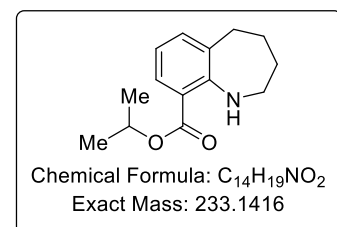

**<sup>1</sup>H NMR (400 MHz, CDCl<sub>3</sub>)** δ 7.80 (dd, *J* = 8.1, 1.7 Hz, 1H), 7.79 (s, 1H), 6.67 (t, *J* = 7.6 Hz, 1H), 5.25 – 5.15 (m, 1H), 3.30 – 3.14 (m, 2H), 2.91 – 2.77 (m, 2H), 1.87 – 1.78 (m, 2H), 1.78 – 1.71 (m, 2H), 1.35 (d, *J* = 6.3 Hz, 6H).

**<sup>13</sup>C{<sup>1</sup>H} NMR (101 MHz, CDCl<sub>3</sub>)** δ 168.5, 154.7, 135.7, 133.4, 129.4, 117.6, 115.4, 67.9, 46.9, 35.5, 30.5, 26.3, 22.1.

**HRMS (ESI) m/z:** Calculated for C<sub>14</sub>H<sub>19</sub>NO<sub>2</sub> [M+H]<sup>+</sup>: 234.1489, found: 234.1483.

### Cyclopentyl 2,3,4,5-tetrahydro-1H-benzo[b]azepine-9-carboxylate (5fi)

Obtained according to the **General procedure B** (0.2 mmol scale), to give **5fi** as a yellow oil (46 mg, 89% yield). Flash column chromatography (petroleum ether/ethyl acetate, 150:1); R<sub>f</sub> 0.8 (petroleum ether/ethyl acetate, 10:1).

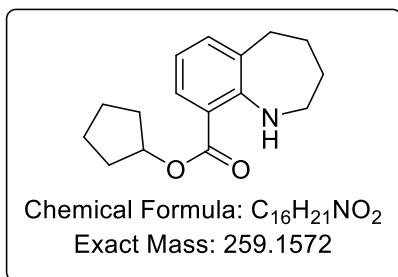

**<sup>1</sup>H NMR (400 MHz, CDCl<sub>3</sub>)** δ 7.77(s, 1H), 7.70 – 7.75 (d, 1H), 7.19 (d, *J* = 7.2 Hz, 1H), 6.66 (t, *J* = 7.6 Hz, 1H), 5.37 – 5.33 (m, 1H), 3.22 – 3.19 (m, 2H), 2.83 – 2.80 (m, 2H), 1.98 – 1.89 (m, 2H), 1.87 – 1.70 (m, 8H), 1.68 – 1.60 (m, 2H).

**<sup>13</sup>C{<sup>1</sup>H} NMR (101 MHz, CDCl<sub>3</sub>)** δ 168.8, 154.6, 135.7, 133.4, 129.4, 117.6, 115.4, 77.4, 46.9, 35.5, 32.9, 30.5, 26.3, 24.0.

**HRMS (ESI) *m/z*:** Calculated for C<sub>13</sub>H<sub>17</sub>NO<sub>2</sub> [M+H]<sup>+</sup>: 260.1645, found: 260.1640.

### 3. Optimization studies

#### Screening of solvents<sup>a</sup>

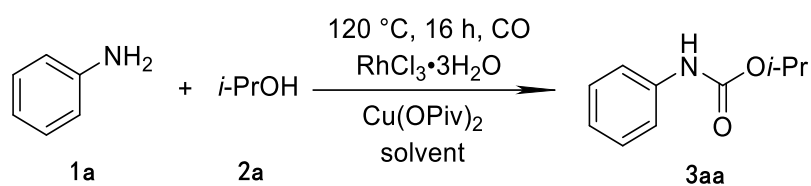

| Entry | Solvent                | Yield <sup>b</sup> (%) |
|-------|------------------------|------------------------|
| 1     | toluene                | 84                     |
| 2     | mesitylene             | 69                     |
| 3     | anisole                | 58                     |
| 4     | 1,4-dioxane            | Trace                  |
| 5     | THF                    | Trace                  |
| 6     | DMF                    | 51                     |
| 7     | <i>n</i> -hexane       | Trace                  |
| 8     | $\text{CF}_3\text{Ph}$ | 79                     |
| 9     | DCE                    | ND                     |
| 10    | $\text{H}_2\text{O}$   | NR                     |
| 11    | DMF:Anisole = 1:1      | 47                     |
| 12    | DMF:Toluene = 1:1      | 42                     |
| 13    | DMF:Anisole = 1:19     | 84                     |
| 14    | DMF:Toluene = 1:19     | 94                     |
| 15    | DMF:Toluene = 1:99     | 90                     |
| 16    | DMF:Toluene = 1:49     | 90                     |

<sup>a</sup>Reaction conditions: **1a** (0.2 mmol, 1 equiv), **2a** (1 mmol, 5 equiv),  $\text{RhCl}_3 \cdot 3\text{H}_2\text{O}$  (0.002 mmol, 1 mol%),  $\text{Cu}(\text{OPiv})_2$  (0.4 mmol, 2 equiv), solvent (2 mL), CO (1 atm) in a 25 mL sealed *J*-Young-tube, 16 h,  $120\text{ }^\circ\text{C}$ . <sup>b</sup>Isolated yield.

### Screening of catalysts<sup>a</sup>

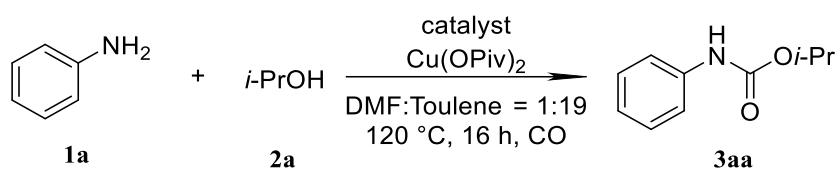

| Entry | catalyst                                  | Yield <sup>b</sup> (%) |
|-------|-------------------------------------------|------------------------|
| 1     | $\text{RhCl}_3 \cdot 3\text{H}_2\text{O}$ | 94                     |
| 2     | $\text{RhCl}_3$                           | 63                     |
| 3     | $[\text{RhCp}^*\text{Cl}_2]_2$            | 40                     |
| 4     | $[\text{Rh}(\text{OAc})_2]_2$             | 91                     |
| 5     | $[\text{Rh}(\text{CO})_2\text{Cl}]_2$     | 88                     |
| 6     | $[\text{Rh}(\text{COD})\text{Cl}]_2$      | 97                     |
| 7     | $\text{Pd}(\text{OAc})_2$                 | Trace                  |
| 8     | $\text{PdCl}_2$                           | 84                     |
| 9     | $\text{Pd}_2(\text{dba})_3$               | Trace                  |

<sup>a</sup>Reaction conditions: **1a** (0.2 mmol, 1 equiv), **2a** (1 mmol, 5 equiv), catalyst (0.002 mmol, 1 mol%),  $\text{Cu(OPiv)}_2$  (0.4 mmol, 2 equiv), DMF/toluene (1/19, 2.0 mL), CO (1 atm) in a 25 mL sealed *J*-Young-tube, 16 h, 120 °C. <sup>b</sup>Isolated yield.

### Screening of oxidant<sup>a</sup>

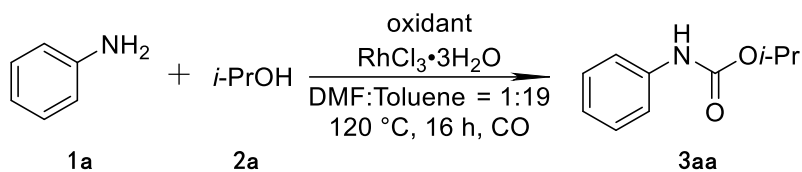

| Entry           | Oxidant                                      | Yield <sup>b</sup> (%) |
|-----------------|----------------------------------------------|------------------------|
| 1               | Cu(OAc) <sub>2</sub>                         | 87                     |
| 2               | Cu(EtO <sub>2</sub> ) <sub>2</sub>           | 76                     |
| 3               | Cu(TFA) <sub>2</sub> ·NH <sub>2</sub> O      | trace                  |
| 4               | Cu(OPiv) <sub>2</sub>                        | 94                     |
| 5               | AgOAc                                        | trace                  |
| 6               | AgOTFA                                       | N.D.                   |
| 7               | AgOPiv                                       | trace                  |
| 8               | Oxone                                        | N.D.                   |
| 9               | BQ                                           | N.D.                   |
| 10              | K <sub>2</sub> S <sub>2</sub> O <sub>8</sub> | N.D.                   |
| 11              | Ag <sub>2</sub> CO <sub>3</sub>              | N.D.                   |
| 12              | CuBr                                         | Trace                  |
| 13              | CuBr <sub>2</sub>                            | N.D.                   |
| 14              | Ag <sub>2</sub> O                            | N.D.                   |
| 15              | PhI(OAc) <sub>2</sub>                        | N.D.                   |
| 16              | ( <i>t</i> -BuO) <sub>2</sub>                | N.D.                   |
| 17              | <i>t</i> -BuOOH                              | N.D.                   |
| 18              | V(CO): V(O <sub>2</sub> ) = 3:1              | N.D.                   |
| 19              | V(CO): V(O <sub>2</sub> ) = 1:1              | N.D.                   |
| 20 <sup>c</sup> | V(CO): V(O <sub>2</sub> ) = 3:1              | Trace                  |
| 21 <sup>c</sup> | V(CO): V(O <sub>2</sub> ) = 1:1              | N.D.                   |

<sup>a</sup>Reaction conditions: **1a** (0.2 mmol, 1 equiv), **2a** (1 mmol, 5 equiv), RhCl<sub>3</sub>·3H<sub>2</sub>O (0.002 mmol, 1 mol%), oxidant (0.4 mmol, 2 equiv), DMF/toluene (1/19, 2.0 mL), CO (1 atm) in a 25 mL sealed *J*-Young-tube, 16 h, 120 °C. <sup>b</sup>Isolated yield. <sup>c</sup>Cu(OPiv)<sub>2</sub> (10 mol%) was added.

### Screening of the concentration of oxidant<sup>a</sup>

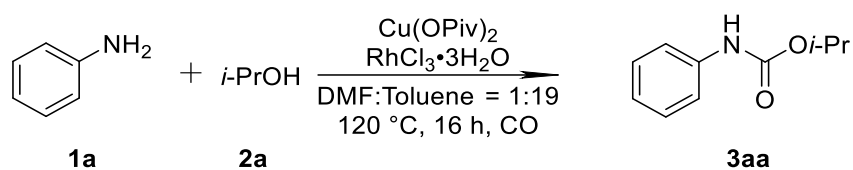

| Entry | Cu(OPiv) <sub>2</sub> (x equiv) | Yield <sup>b</sup> (%) |
|-------|---------------------------------|------------------------|
| 1     | 1                               | 55                     |
| 2     | 1.2                             | 74                     |
| 3     | 1.5                             | 81                     |
| 4     | 2                               | 94                     |

<sup>a</sup>Reaction conditions: **1a** (0.2 mmol, 1 equiv), **2a** (1 mmol, 5 equiv), RhCl<sub>3</sub>·3H<sub>2</sub>O (0.002 mmol, 1 mol%), Cu(OPiv)<sub>2</sub> (x equiv), DMF/toluene (1/19, 2.0 mL), CO (1 atm) in a 25 mL sealed *J*-Young-tube, 16 h, 120 °C. <sup>b</sup>Isolated yield.

### Screening of the reaction temperature<sup>a</sup>

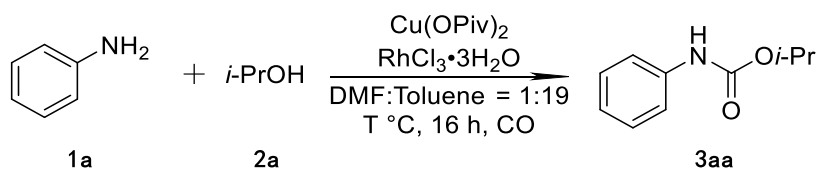

| Entry | Temperature (°C) | Yield <sup>b</sup> (%) |
|-------|------------------|------------------------|
| 1     | 100              | 41                     |
| 2     | 110              | 72                     |
| 3     | 120              | 94                     |
| 4     | 130              | 94                     |
| 5     | 140              | 88                     |

<sup>a</sup>Reaction conditions: **1a** (0.2 mmol, 1 equiv), **2a** (1 mmol, 5equiv), RhCl<sub>3</sub>·3H<sub>2</sub>O (0.002 mmol, 1 mol%), Cu(OPiv)<sub>2</sub> (0.4 mmol, 2 equiv), DMF/toluene (1/19, 2.0 mL), CO (1 atm) in a 25 mL sealed *J*-Young-tube, 16 h, T °C. <sup>b</sup>Isolated yield.



## 4. Preliminary mechanistic studies

### Control experiment to elucidate possible reaction intermediate

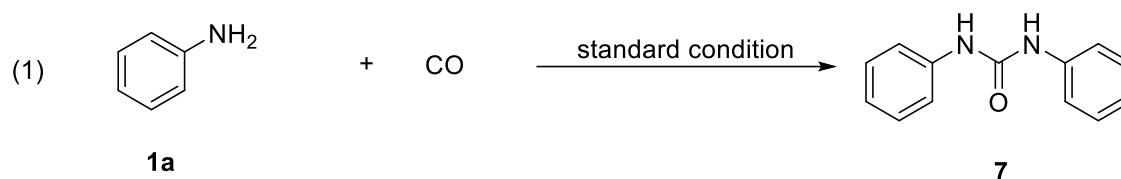

In a glovebox,  $\text{RhCl}_3 \cdot 3\text{H}_2\text{O}$  (0.01 equiv),  $\text{Cu}(\text{OPiv})_2$  (2 equiv), were successively weighed into a dry 50 mL *J*-Young tube equipped with a magnetic stir bar. The *J*-Young tube was sealed and taken out of the glovebox. **1a** (0.8 mmol, 1 equiv), dry toluene/dry DMF (19/1, *v/v*, 8 mL) were added under nitrogen. The reaction mixture was then degassed by three freeze-pump-thaw cycles, backfilled with CO and heated at 120 °C for 16 h. The reaction mixture was then cooled to room temperature. The solvent was evaporated under reduced pressure and the resulting residue was purified by flash column chromatography on silica gel using EtOAc–petroleum ether mixture as an eluent to afford **7** (40.7mg, 48% yield) as a yellow solid.  $^1\text{H NMR}$  (400 MHz, DMSO)  $\delta$  8.66 (s, 2H), 7.51 – 7.42 (m, 4H), 7.33 – 7.23 (m, 4H), 7.02 – 6.92 (m, 2H).  $^{13}\text{C}\{^1\text{H}\}$  NMR (101 MHz, DMSO)  $\delta$  152.6, 139.7, 128.8, 121.8, 118.2. Spectroscopic data are consistent with those previously reported.<sup>[28]</sup>

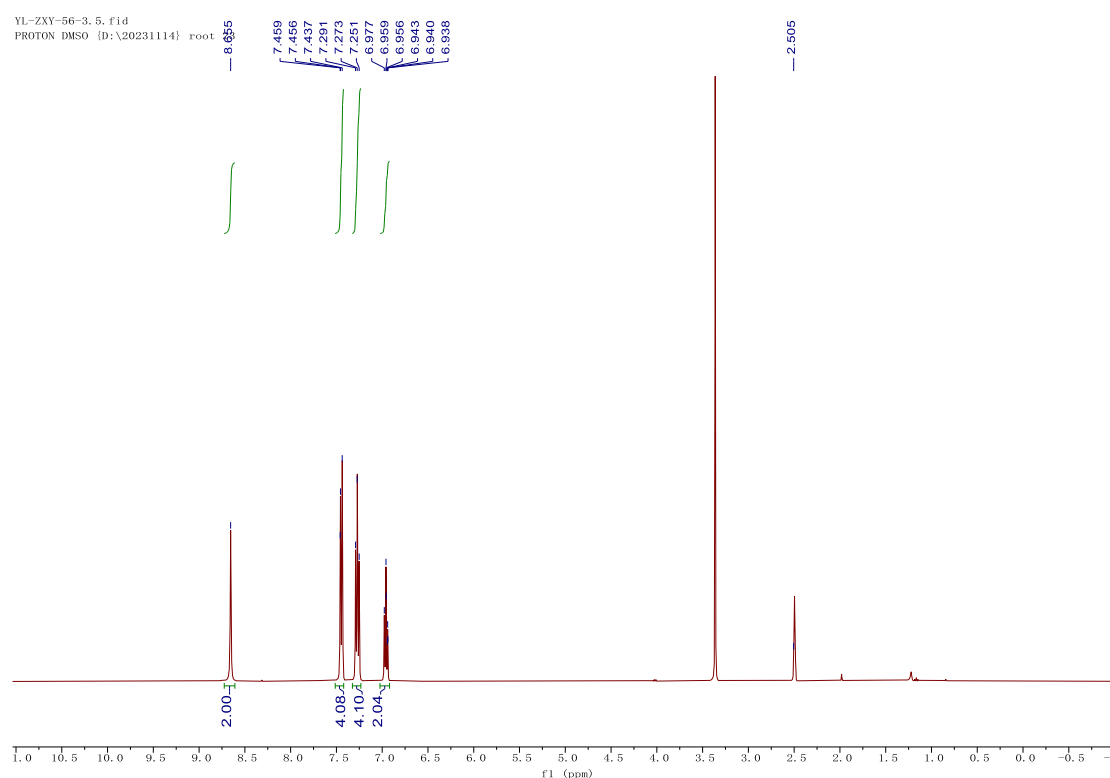

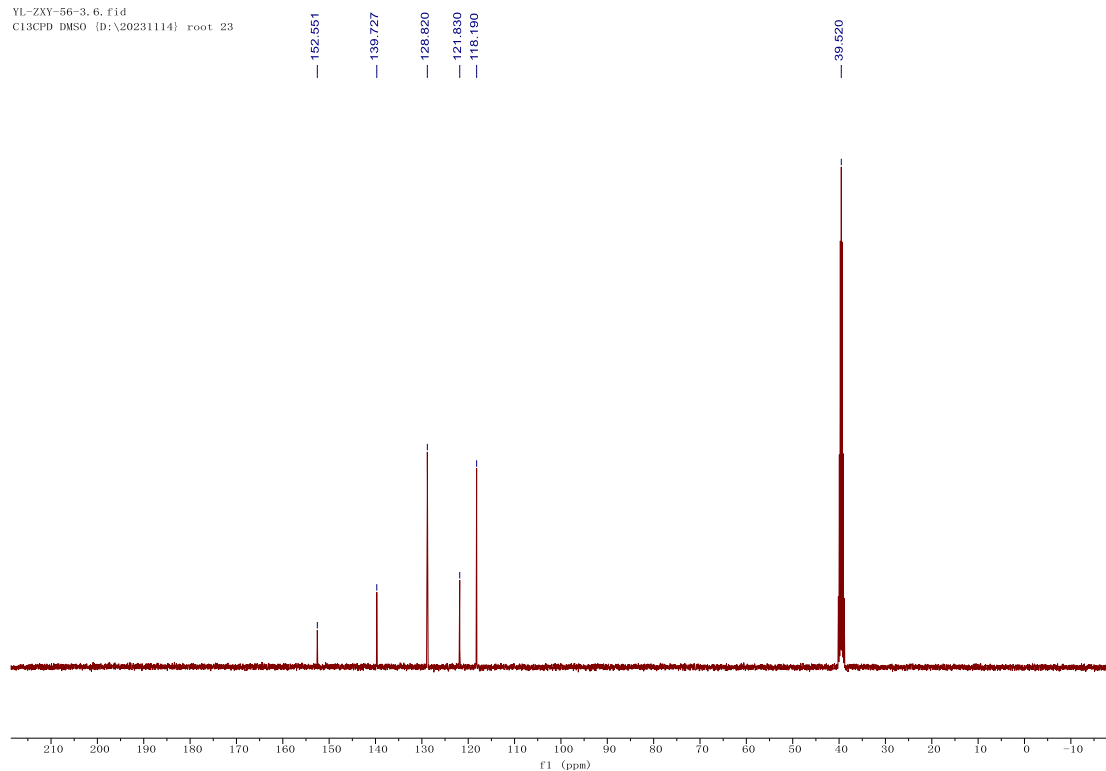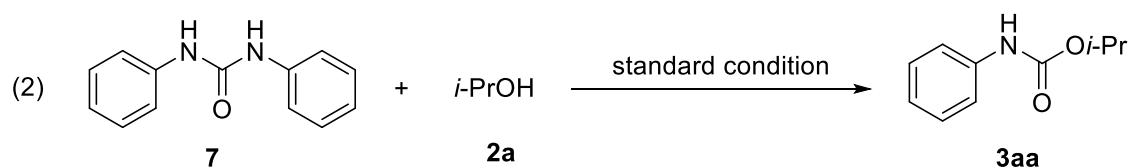

In a glovebox,  $\text{RhCl}_3 \cdot 3\text{H}_2\text{O}$  (0.01 equiv),  $\text{Cu}(\text{OPiv})_2$  (2 equiv), were successively weighed into a dry 25 mL *J*-Young tube equipped with a magnetic stir bar. The *J*-Young tube was sealed and taken out of the glovebox. **7** (0.2 mmol, 1 equiv), **2a** (5 equiv), dry toluene (1.9 mL) and dry DMF (0.1 mL) were added under nitrogen. The reaction mixture was then degassed by three freeze-pump-thaw cycles, backfilled with CO and heated at 120 °C for 16h. Then, the reaction mixture was cooled to room temperature. The solvent was evaporated under reduced pressure and the resulting residue was purified by flash column chromatography on silica gel using EtOAc–petroleum ether mixture as an eluent to afford the desired compound **3aa** (30.4 mg, 85% yield).

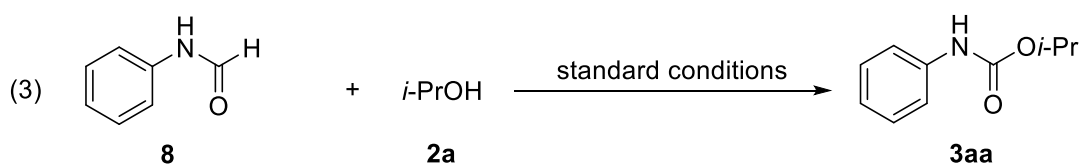

In a glovebox,  $\text{RhCl}_3 \cdot 3\text{H}_2\text{O}$  (0.01 equiv),  $\text{Cu}(\text{OPiv})_2$  (2 equiv), were successively weighed into a dry 25 mL *J*-Young tube equipped with a magnetic stir bar. The *J*-Young tube was sealed and taken out of the glovebox. **8** (0.2 mmol, 1 equiv), **2a** (5 equiv), dry toluene (1.9 mL) and dry DMF (0.1 mL) were added under nitrogen. The reaction mixture was then degassed by three freeze-pump-thaw cycles, backfilled with CO and heated at 120 °C for 16 h. Then, the reaction mixture was cooled to room temperature. The solvent was evaporated under reduced pressure and the resulting residue was purified by flash column chromatography on silica gel using EtOAc–petroleum ether mixture as an eluent to afford the desired compound **3aa** (6.8mg, 19% yield).

**More control experiments to get insights into the effect of copper or rhodium salts**

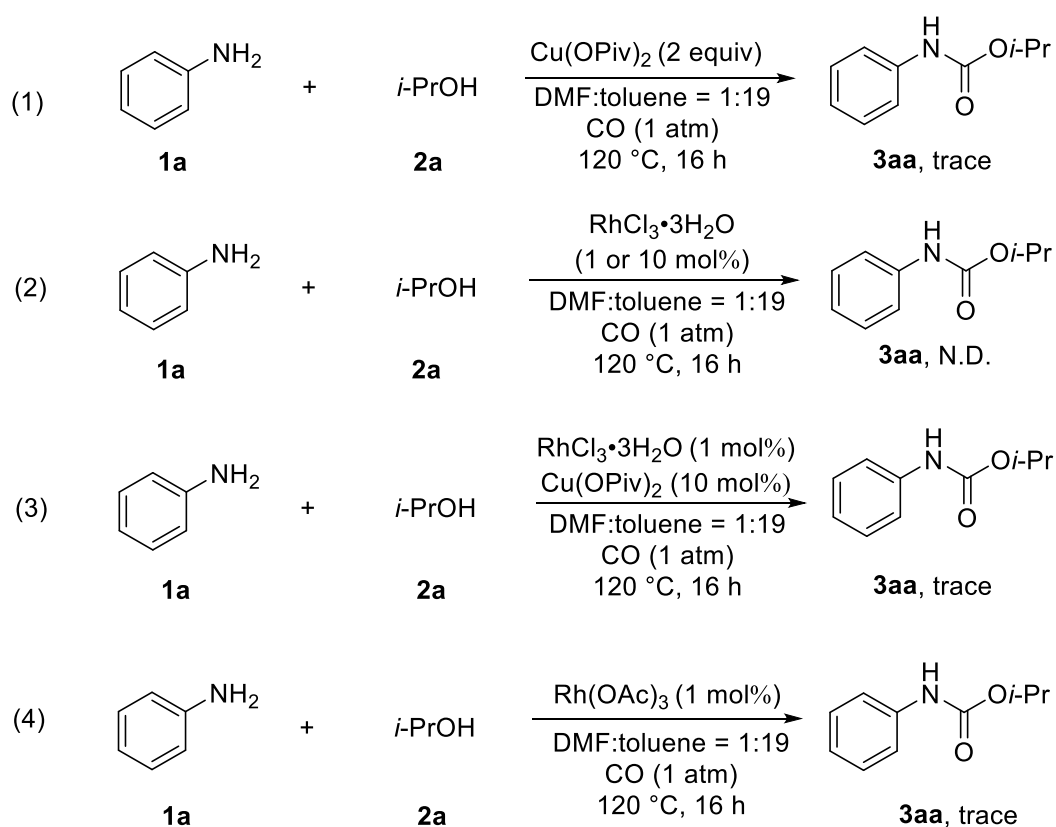

In a glovebox, [Rh] (X equiv) or/and  $\text{Cu}(\text{OPiv})_2$  (Y equiv), were successively weighed into a dry 25 mL *J*-Young tube equipped with a magnetic stir bar. The *J*-Young tube was sealed and taken out of the glovebox. **1a** (0.2 mmol, 1 equiv), **2a** (5 equiv), dry toluene (1.9 mL) and dry DMF (0.1 mL) were added under nitrogen. The reaction mixture was

then degassed by three freeze-pump-thaw cycles, backfilled with CO and heated at 120 °C for 16 h. Then, the reaction mixture was cooled to room temperature and analyzed by GC-MS and TLC.

**More control experiments to get insights into the formation of 3aa from 7 and 2a**

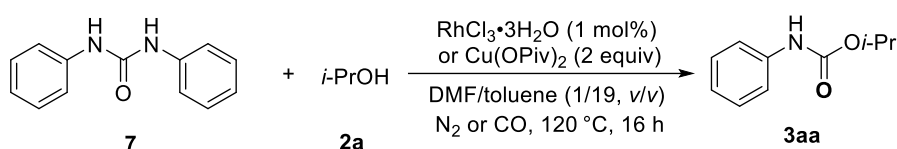

| Entry <sup>a</sup> | N <sub>2</sub> | CO | RhCl <sub>3</sub> ·3H <sub>2</sub> O | Cu(OPiv) <sub>2</sub> | Yield <sup>b</sup> of 3aa |
|--------------------|----------------|----|--------------------------------------|-----------------------|---------------------------|
| 1                  | /              | √  | √                                    | √                     | 90%                       |
| 2                  | /              | √  | √                                    | /                     | 14%                       |
| 3                  | /              | √  | /                                    | √                     | 68%                       |
| 4                  | /              | √  | /                                    | /                     | 13%                       |
| 5                  | √              | /  | √                                    | √                     | 56%                       |
| 6                  | √              | /  | √                                    | /                     | 16%                       |
| 7                  | √              | /  | /                                    | √                     | 71%                       |
| 8                  | √              | /  | /                                    | /                     | 15%                       |

<sup>a</sup>Reaction conditions: **7** (0.2 mmol), **2a** (5 equiv), Cu(OPiv)<sub>2</sub> (0 or 2 equiv), RhCl<sub>3</sub>·3H<sub>2</sub>O (0 or 1 mol%), DMF/toluene (1/19, 2.0 mL), CO (1 atm) or N<sub>2</sub> in 25 mL sealed *J*-Young tube at 120 °C for 16 h. <sup>b</sup>Yield determined by <sup>1</sup>H NMR using 1,3,5-trimethoxybenzene as internal standard

**Plausible reaction mechanism for C–H alkoxy carbonylation**

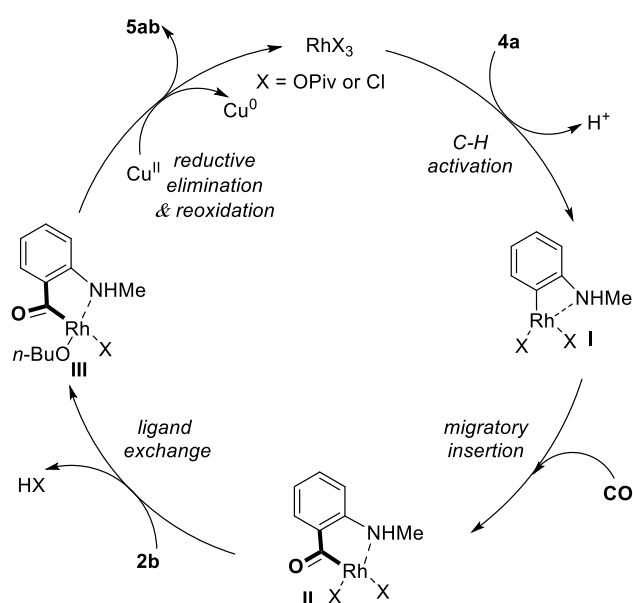

## 5. References

- [1] Y. Gu, A. Miura, M. Tamura, Y. Nakagawa and K. Tomishige, Highly Efficient Synthesis of Alkyl *N*-Arylcarbamates from CO<sub>2</sub>, Anilines, and Branched Alcohols with a Catalyst System of CeO<sub>2</sub> and 2-Cyanopyridine. *ACS Sustainable Chem. Eng.* 2019, **7**, 16795–16802
- [2] M. Usman, Z.-H. Ren, Y.-Y. Wang and Z.-H. Guan, Copper-catalyzed Carbonylation of Anilines by Diisopropyl Azodicarboxylate for the Synthesis of Carbamates. *RSC Adv.* 2016, **6**, 107542–107546.
- [3] N. Uhlig and C.-J. Li, Aniline Carbamates: A Versatile and Removable Motif for Palladium-Catalyzed Directed C–H Activation. *Chem. Eur. J.* 2014, **20**, 12066–12070.
- [4] G. C. Finger, D. R. Dickerson, D. E. Orlopp and W. Ehrmantraut, Aromatic Fluorine Compounds. XII. *N*-(Fluorophenyl) Carbamates. *J. Med. Chem.* 1964, **7**, 572–573.
- [5] D. Murzin and V. Kolesova, Synthesis of Intermediate Compounds with P-N Bond from (Thio)Carbamates and Chlorodioxaphospholanes and -Phosphorinanes and Their Reactivity. *Eur. J. Chem.* 2013, **4**, 336–342.
- [6] P. C. Kearney, Influence of Physicochemical Properties on Biodegradability of Phenylcarbamate Herbicides. *J. Agr. Food Chem.* 1967, **15**, 568–571.
- [7] Y. Jiang, B. Li, N. Ma, S. Shu, Y. Chen, S. Yang, Z. Huang, D. Shi and Zhao, Photoredox-Catalyst-Enabled *para*-Selective Trifluoromethylation of *tert*-Butyl Arylcarbamates. *Angew. Chem. Int. Ed.* 2021, **60**, 19030–19034.
- [8] N. V.;Reddy, K. R. Prasad, P. S. Reddy, M. L. Kantam and K. R. Reddy, Metal Free Oxidative Coupling of Aryl Formamides with Alcohols for the Synthesis of Carbamates. *Org. Biomol. Chem.* 2014, **12**, 2172–2175.
- [9] Z.-H. Guan, H. Lei, M. Chen, Z.-H. Ren, Y. Bai and Y.-Y. Wang, Palladium-Catalyzed Carbonylation of Amines: Switchable Approaches to Carbamates and *N,N'*-Disubstituted Ureas. *Adv. Synth. Catal.* 2012, **354**, 489–496.
- [10] Z. Shao, F. Wang, J. Shi, L. Ma and Z. Li, Synergetic Copper/TEMPO-Catalysed Benzylic C–H Imidation with *N*-Fluorobenzenesulfonimide at room Temperature and Tandem Conversions with Alcohols or Arenes. *Org. Chem. Front.* 2021, **8**, 3298–3307.
- [11] N. Egger, L. Hoesch and A. S. Dreiding, Azimine. VII. Preparation by oxidation of triazanes. *Helv. Chim. Acta.* 1983, **66**, 1599–1607.
- [12] X. Zhang and H. Jing, A Facile One-Pot Phosgene-Free Synthesis of Naphthalen-1-ylcarbamates by Selenium-Catalyzed Carbonylation of 1-Nitronaphthalene with Carbon Monoxide. *J. Mol. Catal. A-Chem.* 2009, **302**, 137–141.
- [13] D. L. Boger, B. E. Fink and M. P. Hedrick, Chemical Total Synthesis of Distamycin A and 2640 Analogues: A Solution-Phase Combinatorial Approach to the Discovery of New, Bioactive DNA Binding Agents and Development of a Rapid, High-Throughput Screen for Determining Relative DNA Binding Affinity or DNA Binding Sequence Selectivity. *J. Am. Chem. Soc.* 2000, **122**, 6382–6639.
- [14] Z. G. Hajos, D. R. Parrish and M. W. Goldberg, Synthesis and Stereochemistry of Hydrophenanthrenes. III. The Reaction of 1,3-Dicyclohexyl-1-(1,2,3,9,10,10 $\alpha\beta$ -hexahydro-7-methoxy-2 $\alpha$ -phenanthrylc arboxyl)urea with Sodium Alkoxides. *J. Org. Chem.* 1965, **30**, 2849–2851.
- [15] M. I. Ogbu, D. M. Bassani, F. Robert and Y. Landais, Photocatalyzed Decarboxylation of Oxamic Acids under Near-Infrared Conditions. *Chem. Commun.* 2022, **58**, 8802–8805.
- [16] Q. Zhang, H.-Y. Yuan, N. Fukaya, H. Yasuda and J.-C. Choi, A Simple Zinc Catalyst for Carbamate Synthesis Directly from CO<sub>2</sub>. *ChemSusChem* 2017, **10**, 1501–1508.

- [17] M. Shimizu and M. Sodeoka, Convenient Method for the Preparation of Carbamates, Carbonates, and Thiocarbonates. *Org. Lett.* 2007, **9**, 5231–5234.
- [18] J. R. Alexander and M. J. Cook, Formation of Ketenimines via the Palladium-Catalyzed Decarboxylative  $\pi$ -Allylic Rearrangement of *N*-Alloc Ynamides. *Org. Lett.* 2017, **19**, 5822–5825.
- [19] Y. Matsumura, Y. Satoh, O. Onomura and T. Maki, A New Method for Synthesis of Unsymmetrical Ureas Using Electrochemically Prepared Trifluoroethyl Carbamates. *J. Org. Chem.* 2000, **65**, 1549–1551.
- [20] T. Isobe and T. Ishikawa, 2-Chloro-1,3-Dimethylimidazolium Chloride. 3. Utility for Chlorination, Oxidation, Reduction, and Rearrangement Reactions. *J. Org. Chem.* 1999, **64**, 5832–5835.
- [21] N. V. Reddy, K. R. Prasad, P. S. Reddy, M. L. Kantam and K. R. Reddy, Metal Free Oxidative Coupling of Aryl Formamides with Alcohols for the Synthesis of Carbamates. *Org. Biomol. Chem.* 2014, **12**, 2172–2175.
- [22] M. Hatano, S. Kamiya, K. Moriyama and K. Ishihara, Lanthanum(III) Isopropoxide Catalyzed Chemoselective Transesterification of Dimethyl Carbonate and Methyl Carbamates. *Org. Lett.* 2011, **13**, 430–433.
- [23] A. R. Sardarian, M. Zangiabadi and I. D. Inaloo, Fe<sub>3</sub>O<sub>4</sub>@SiO<sub>2</sub>/Schiff Base/Pd Complex as an Efficient Heterogeneous and Recyclable Nanocatalyst for Chemoselective *N*-Arylation of *O*-Alkyl Primary Carbamates. *RSC Adv.* 2016, **6**, 92057–92064.
- [24] B. Das, A. Dahiya, A. K. Sahoo and B. K. Patel, Transformable Transient Directing Group-Assisted C(sp<sup>2</sup>)-H Activation: Synthesis and Late-Stage Functionalizations of *o*-Alkenylanilines. *J. Org. Chem.* 2022, **87**, 13383–13388.
- [25] W. H. Pirkle and J. R. Hauske, Trichlorosilane-Induced Cleavage. A Mild Method for Retrieving Carbinols from Carbamates. *J. Org. Chem.* 1977, **42**, 2781–2782.
- [26] J. Bruffaerts, N. von Wolff, Y. Diskin-Posner, Y. Ben-David and D. Milstein, Formamides as Isocyanate Surrogates: A Mechanistically Driven Approach to the Development of Atom-Efficient, Selective Catalytic Syntheses of Ureas, Carbamates, and Heterocycles. *J. Am. Chem. Soc.* 2019, **141**, 16486–16493.
- [27] M. Chen, Z.-H. Ren, Y.-Y. Wang and Z.-H. Guan, Palladium-Catalyzed Oxidative Carbonylation of Aromatic C–H Bonds of *N*-Alkylanilines with CO and Alcohols for the Synthesis of *o*-Aminobenzoates. *J. Org. Chem.* 2015, **80**, 1258–1263.
- [28] K. Mao, L. Lv and Z. Li, Amine-Induced Selective C–C Bond Cleavage of 2,2,2-Trifluoroethyl Carbonyls for the Synthesis of Ureas and Amides. *J. Org. Chem.* 2023, **88**, 10137–10146.

## 6. NMR spectra

### $^1\text{H}$ NMR (400 MHz, $\text{CDCl}_3$ ) spectrum of compound **3aa**.

YL-CXQ-SD. 1. fid  
PROTON CDCl3 [D:\20230223] root 24

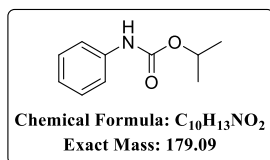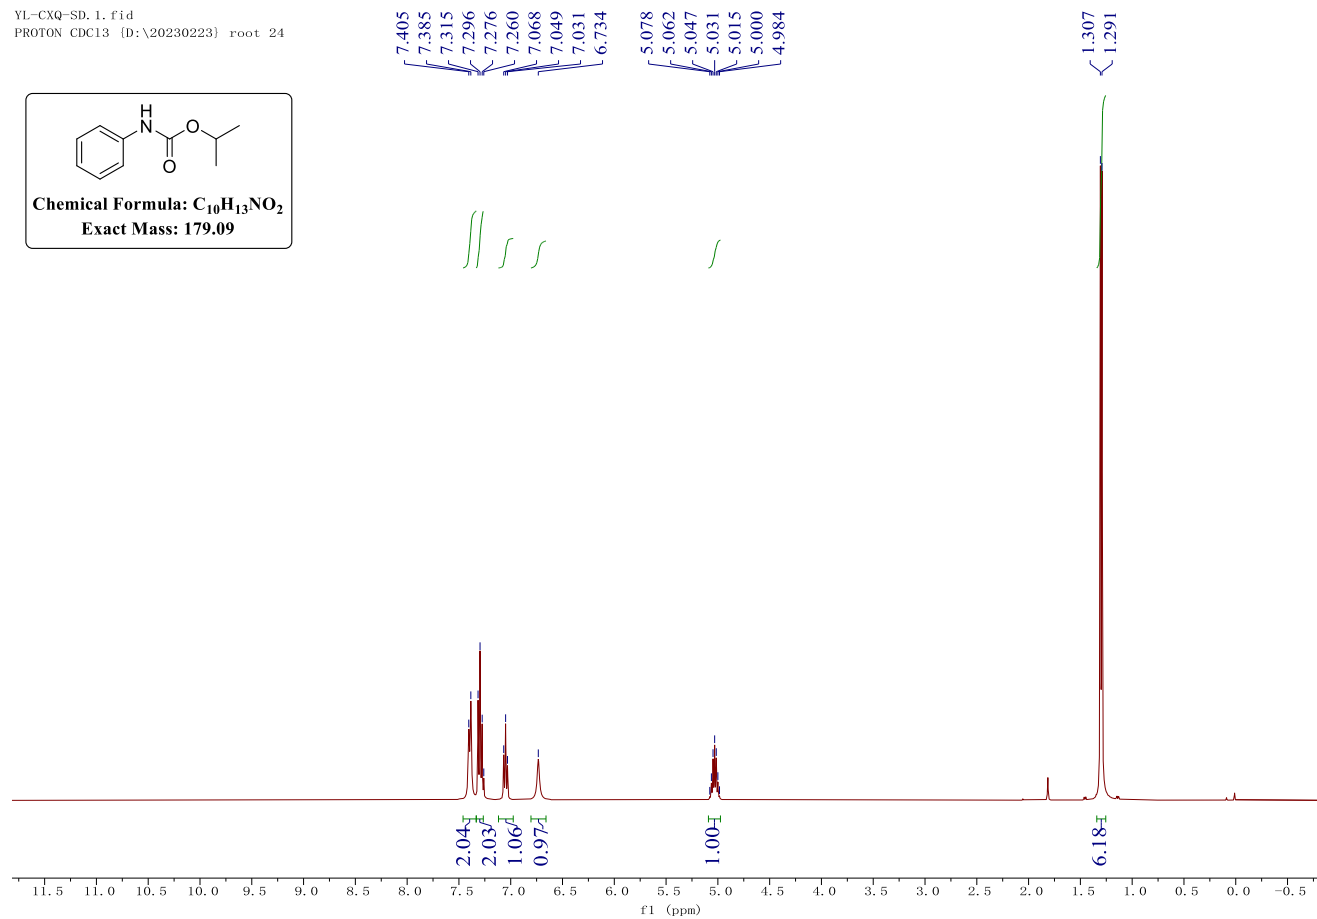

$^{13}\text{C}\{^1\text{H}\}$  NMR (101 MHz,  $\text{CDCl}_3$ ) spectrum of compound **3aa**.

YL-CXQ-SD. 2. fid  
C13CPD CDC13 {D:\20230223} root 24

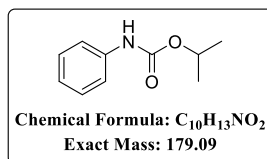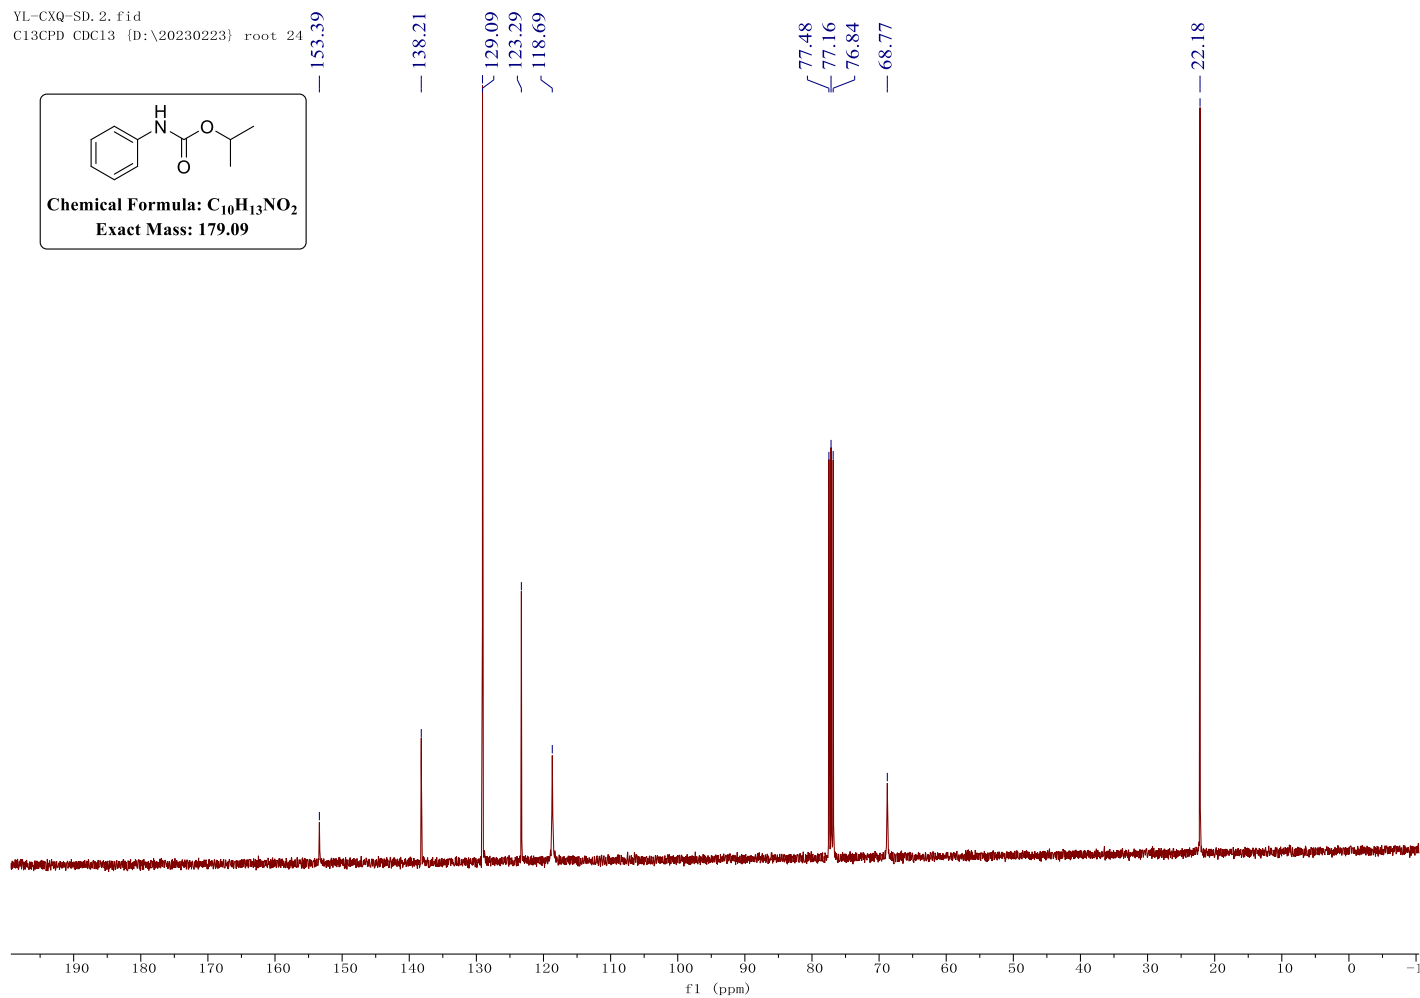



# <sup>1</sup>H NMR (400 MHz, CDCl<sub>3</sub>) spectrum of compound **3ba**.

YL-CXQ-773-P-H.1.fid  
PROTON CDCl3 {D:\20221123} root 4

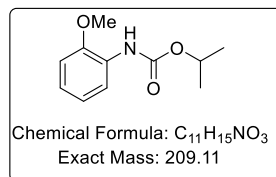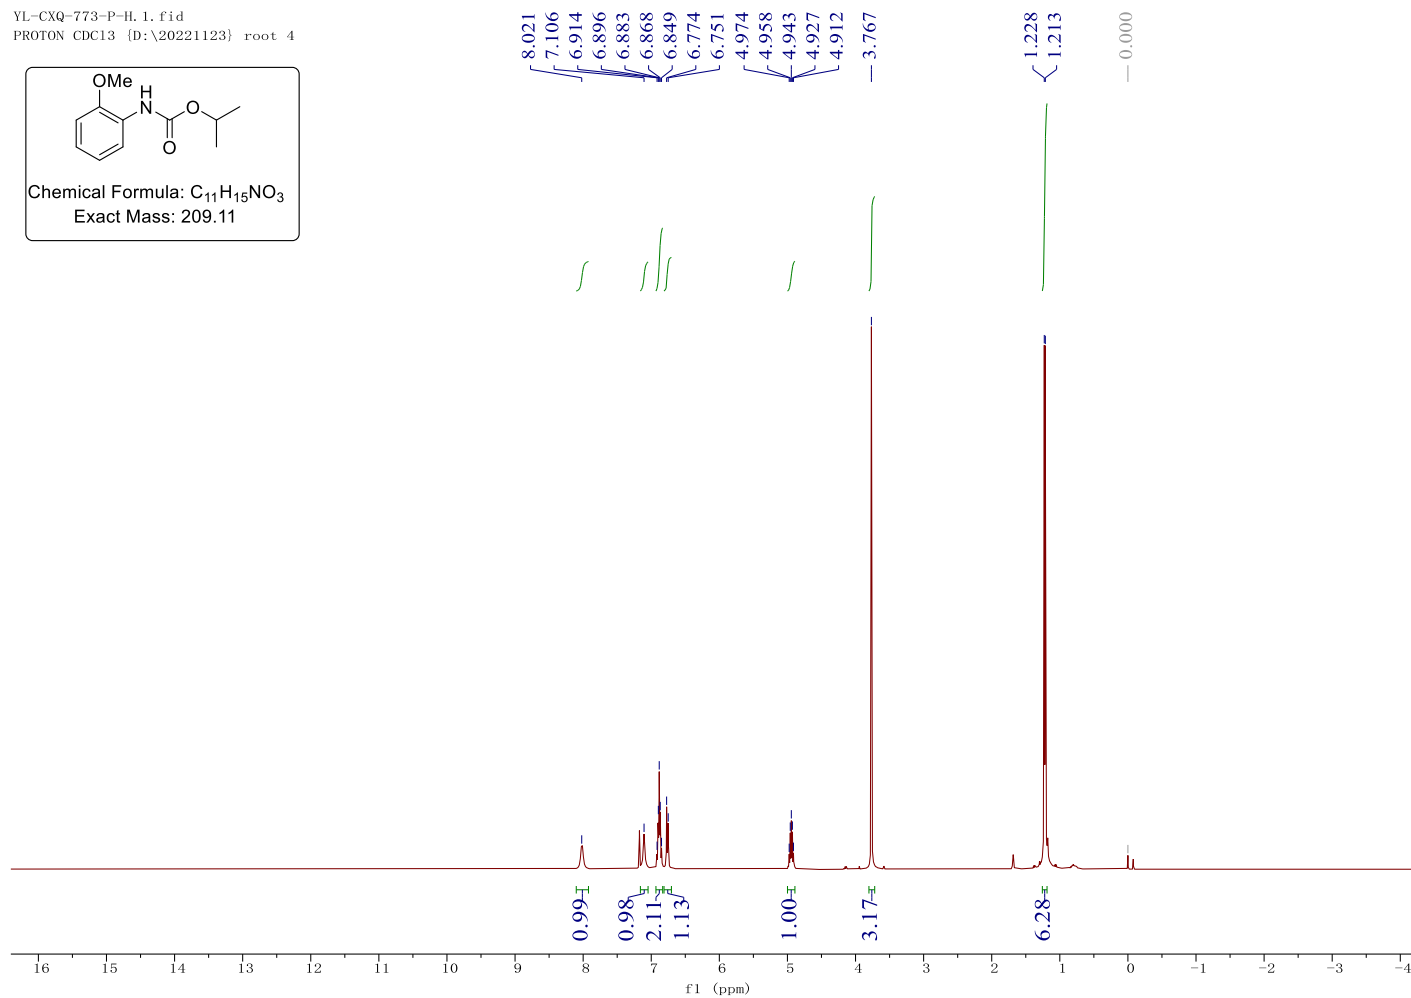

$^{13}\text{C}\{^1\text{H}\}$  NMR (101 MHz,  $\text{CDCl}_3$ ) spectrum of compound **3ba**.

YL-CXQ-773-P-C. 1. 1. 1r  
C13CPD CDCl3 {D:\20221127} root 9

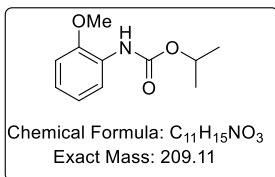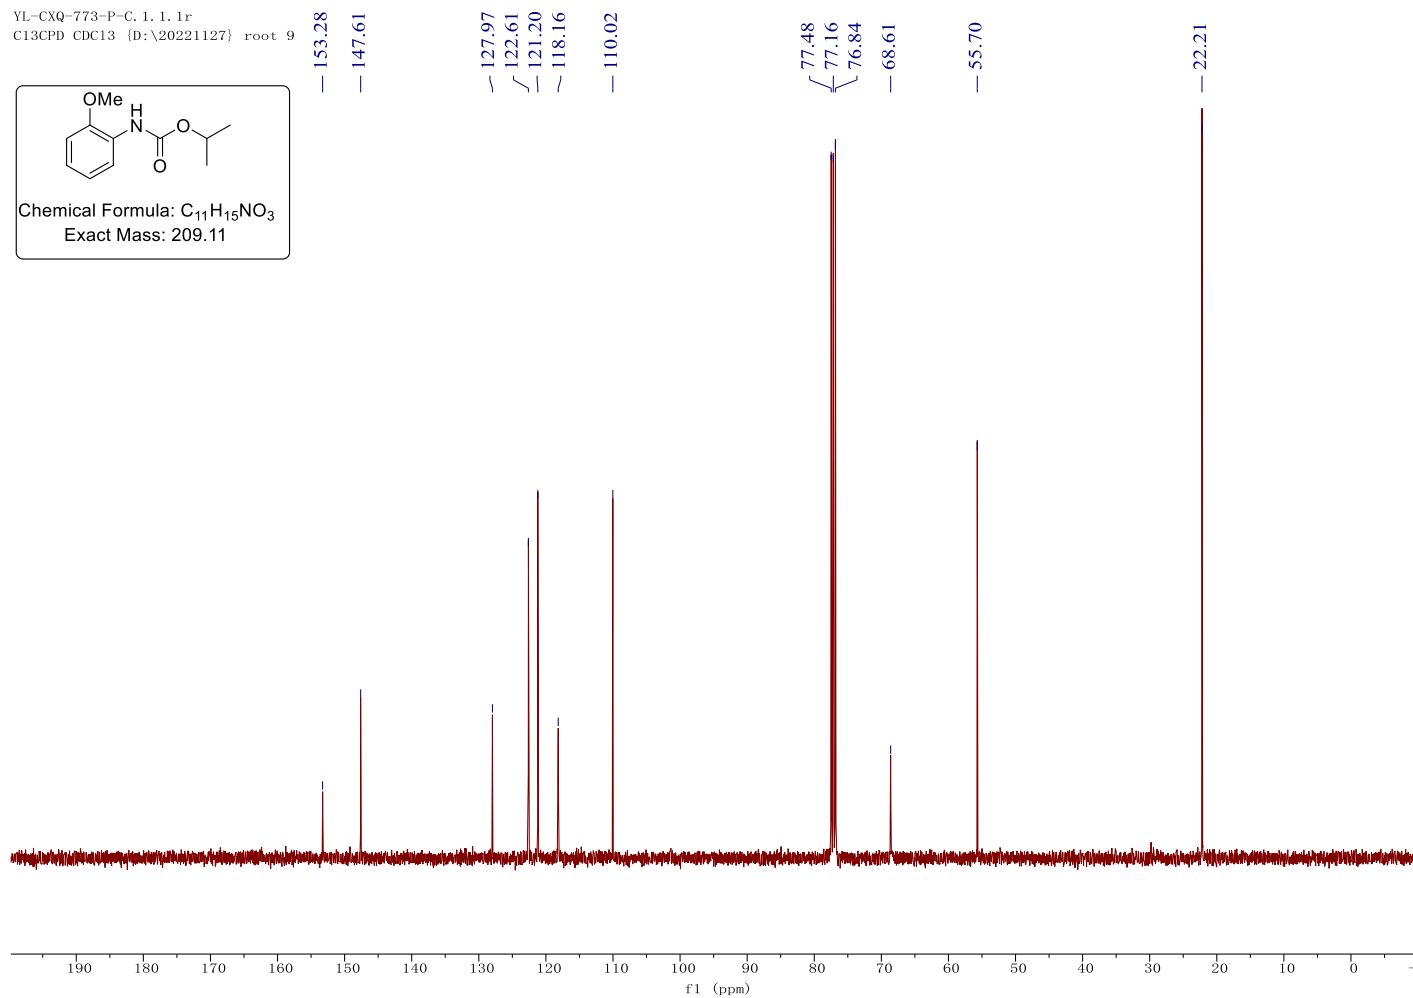

# <sup>1</sup>H NMR (400 MHz, CDCl<sub>3</sub>) spectrum of compound **3ca**.

YL-CXQ-748-P-H.1.fid  
PROTON CDCl3 [D:\20221114] root 4

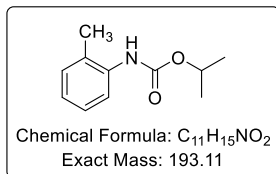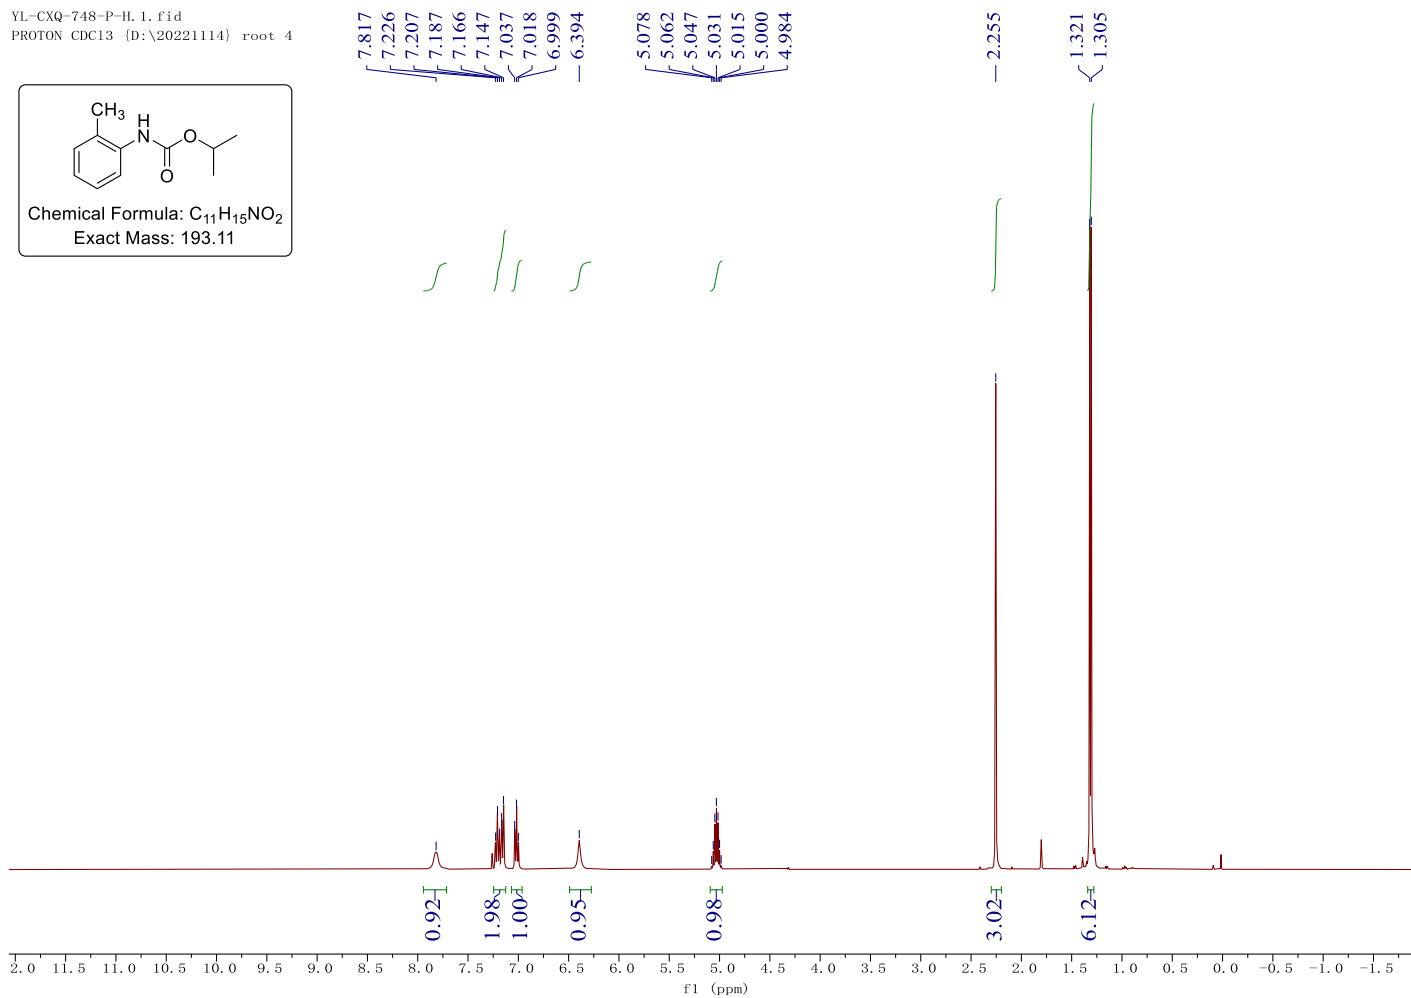

$^{13}\text{C}\{^1\text{H}\}$  NMR (101 MHz,  $\text{CDCl}_3$ ) spectrum of compound **3ca**.

YL-CXQ-748-P-C. 1. fid  
C13CPD CDCl3 [D:\20221123] root 6

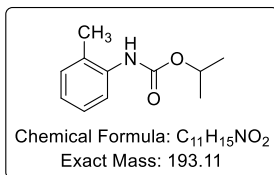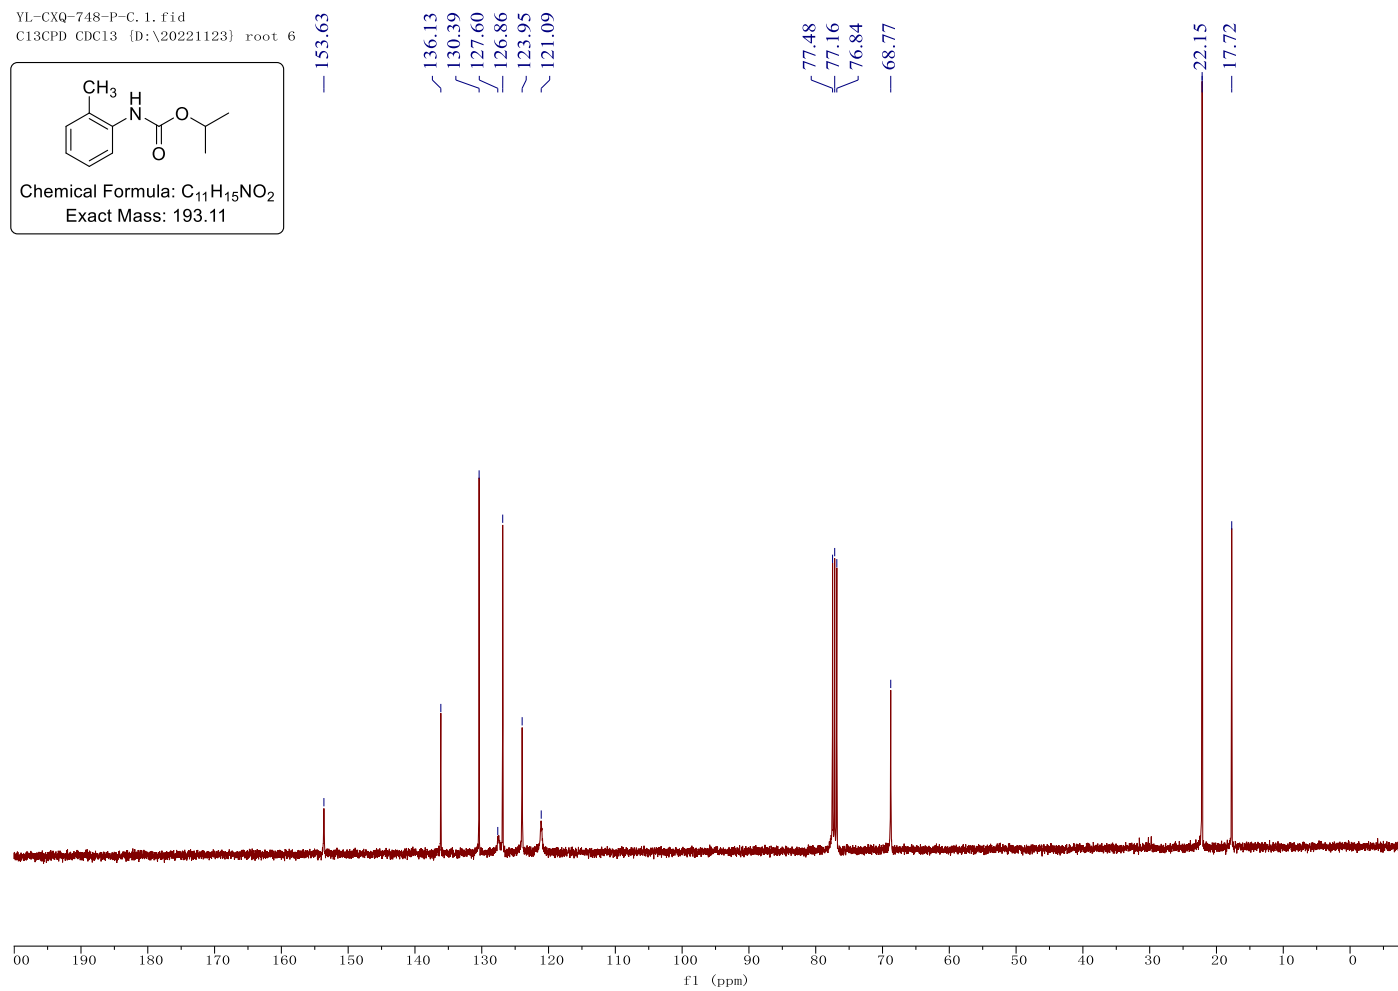

# <sup>1</sup>H NMR (400 MHz, CDCl<sub>3</sub>) spectrum of compound **3da**.

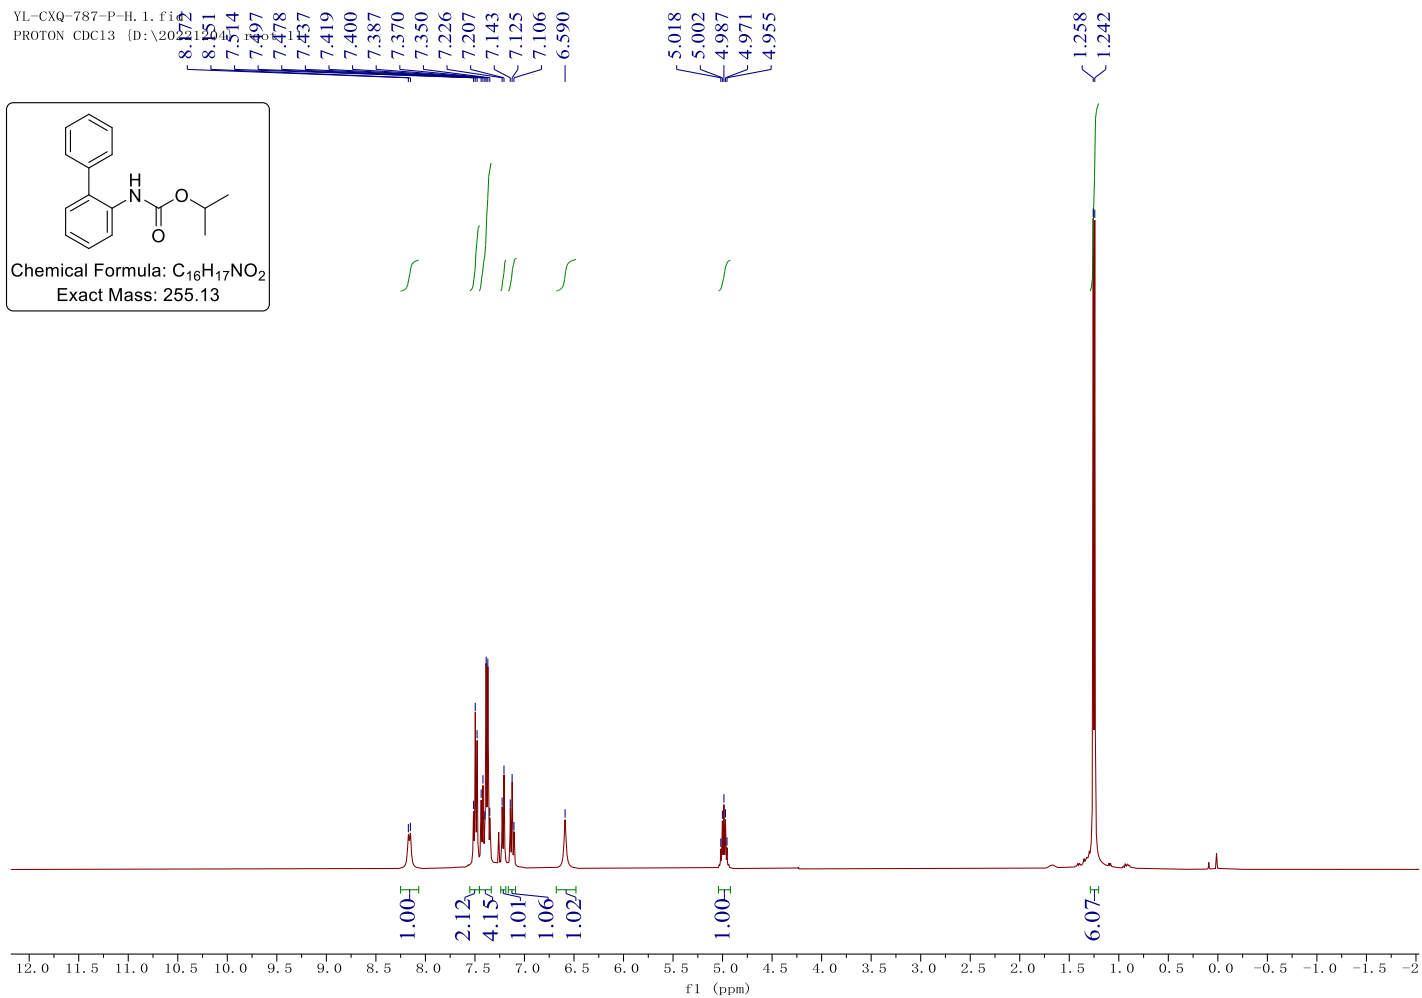

# $^{13}\text{C}\{^1\text{H}\}$ NMR (101 MHz, $\text{CDCl}_3$ ) spectrum of compound **3da**.

YL-CXQ-787-P-C. 2. 1. 1r  
C13CPD CDCl3 (D:\20221210) root 56

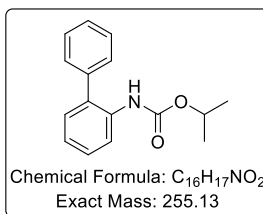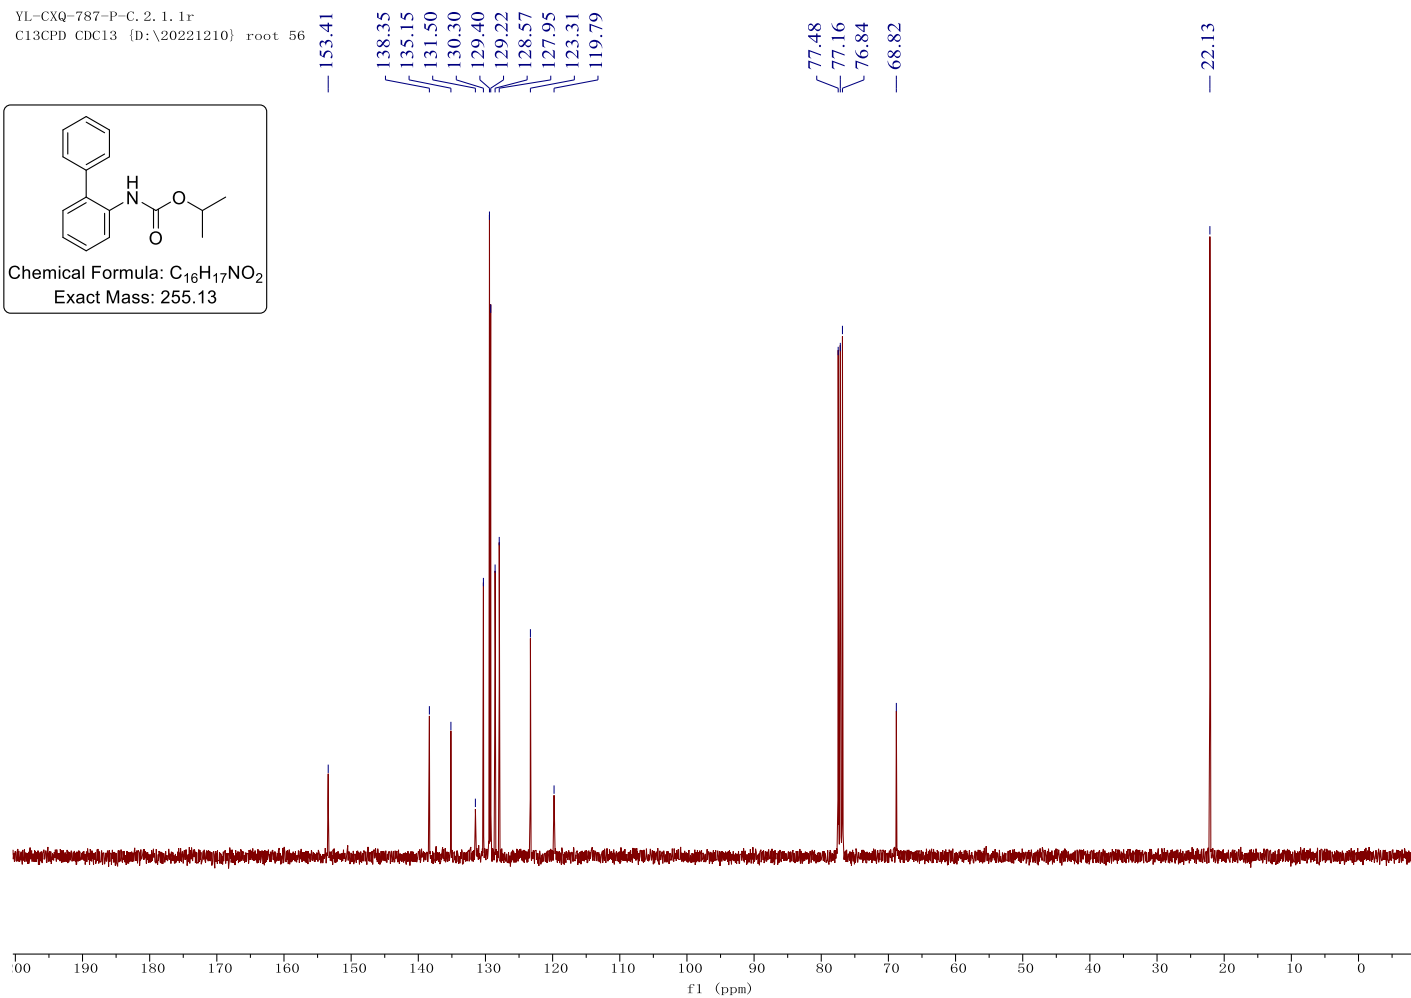

# <sup>1</sup>H NMR (400 MHz, CDCl<sub>3</sub>) spectrum of compound **3ea**.

YL-CXQ-761-P-H.1.fid  
PROTON CDCl3 [D:\20221120] root 1

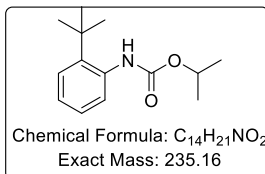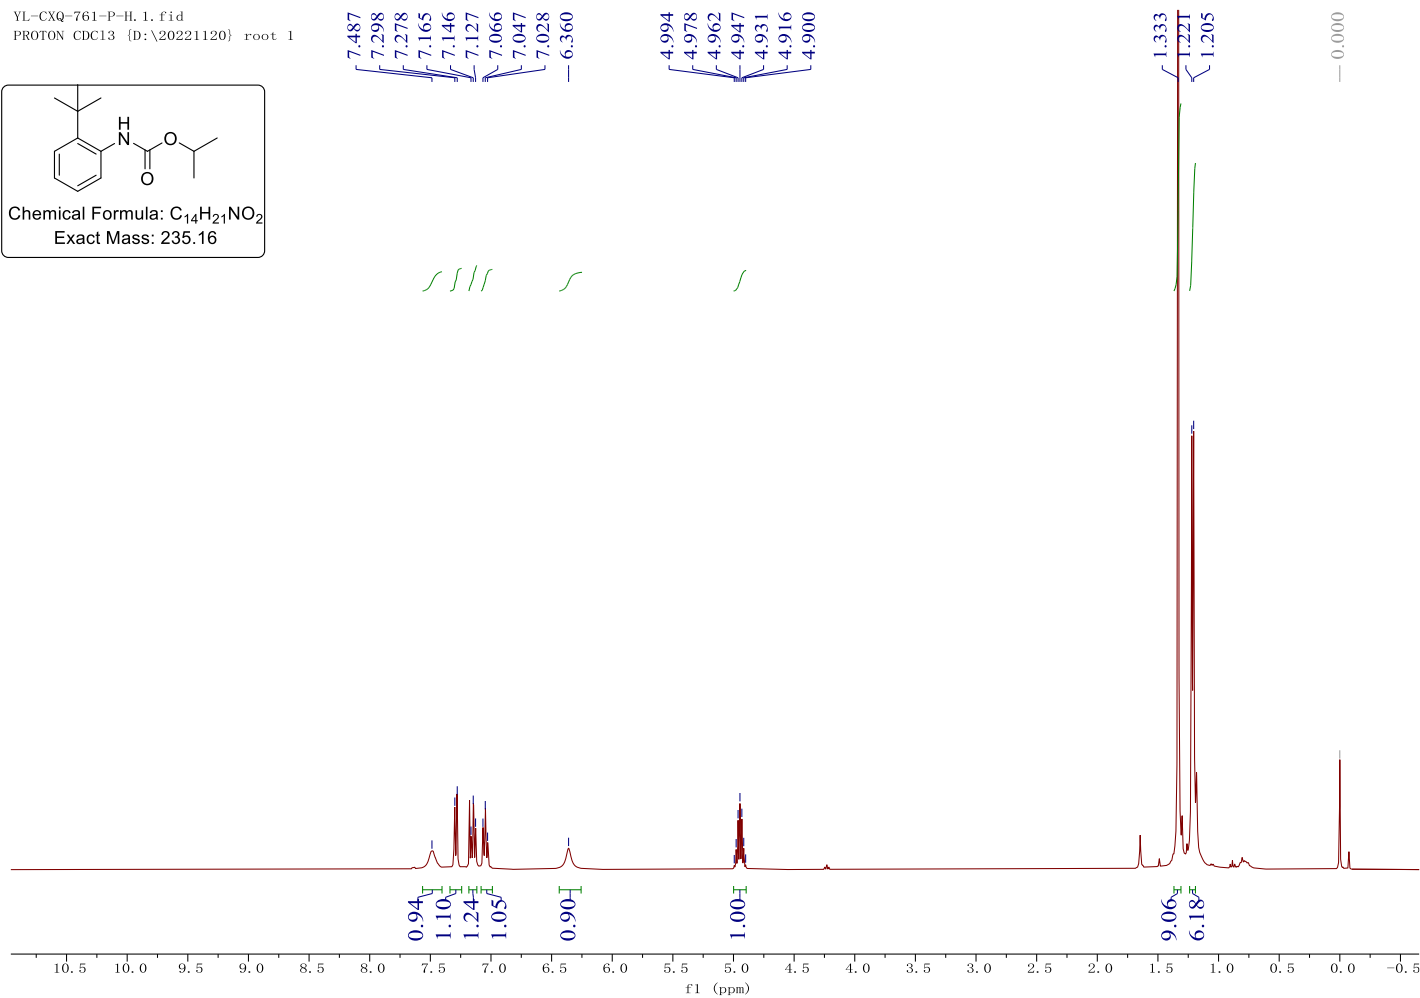

# $^{13}\text{C}\{^1\text{H}\}$ NMR (101 MHz, $\text{CDCl}_3$ ) spectrum of compound **3ea**.

YL-WL-239-C. 1. 1. 1r  
C13CPD CDC13 {D:\20231227} root 28

154.27  
142.03  
135.58  
126.90  
126.48  
125.51  
77.48  
77.16  
76.84  
68.75  
34.64  
30.73  
22.25

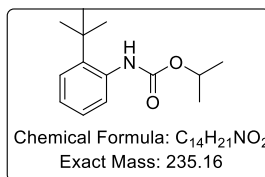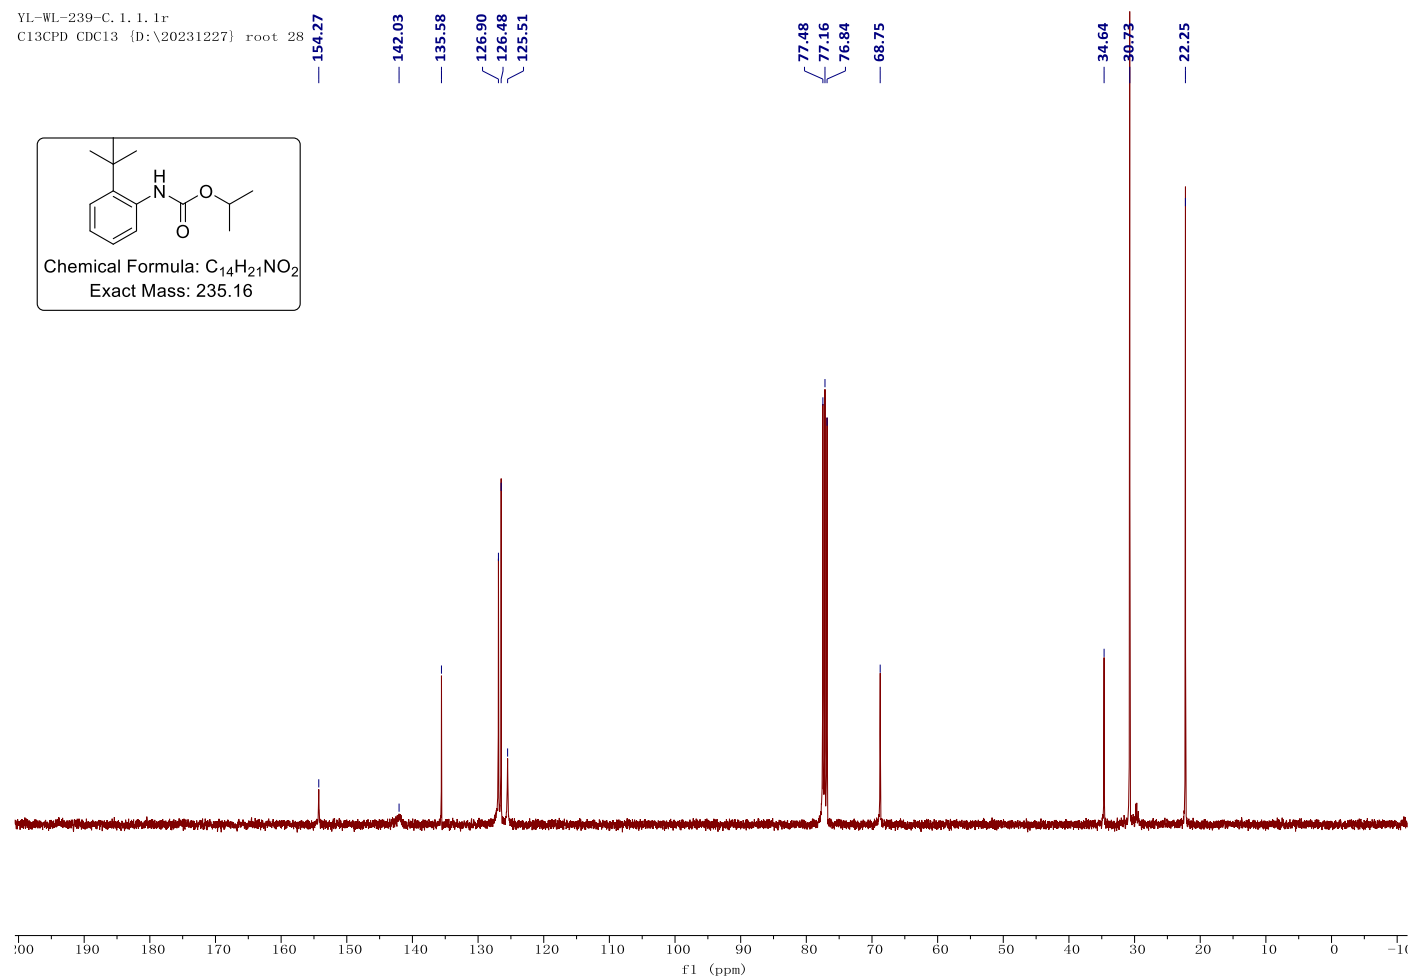



# <sup>1</sup>H NMR (400 MHz, CDCl<sub>3</sub>) spectrum of compound **3fa**.

YL-CXQ-763-P-H.1.fid  
PROTON CDCl3 [D:\20221120] root 4

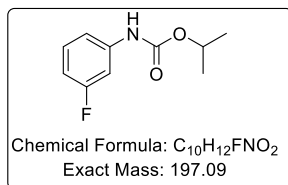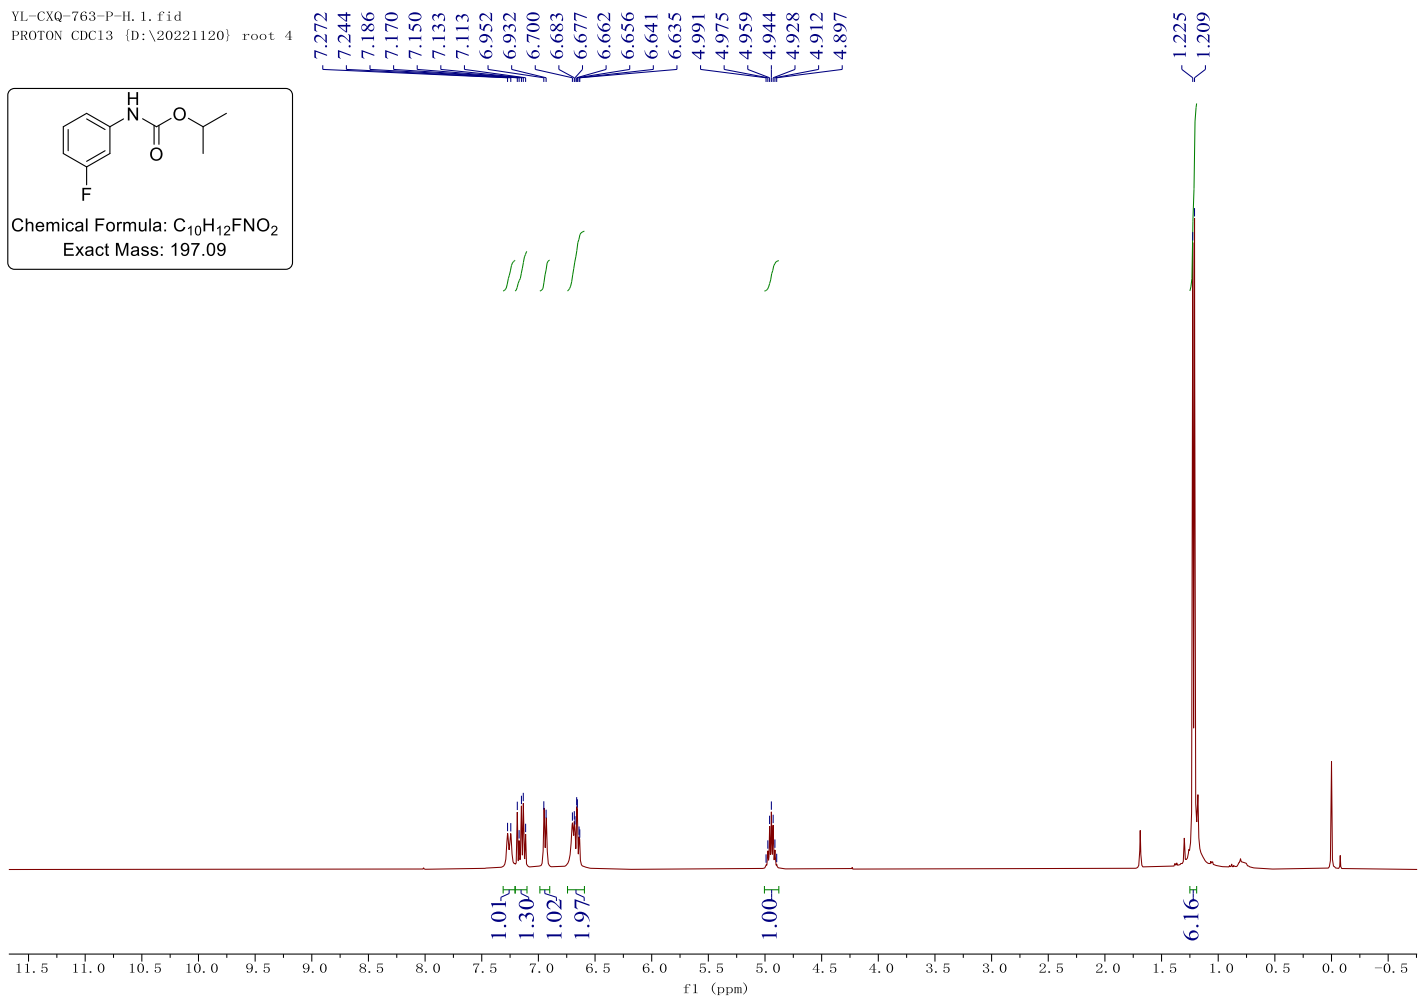

**$^{13}\text{C}\{^1\text{H}\}$  NMR (101 MHz,  $\text{CDCl}_3$ ) spectrum of compound **3fa**.**

YL-CXQ-763-P-C. 1. 1. 1r  
C13CPD CDCl3 (D:\20221123)

164.52  
163.10  
153.15

139.96  
139.85  
130.22  
130.13

113.93  
110.06  
109.85  
106.20  
105.93

77.48  
77.16  
76.84  
69.18

22.14

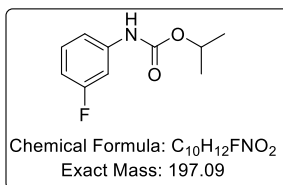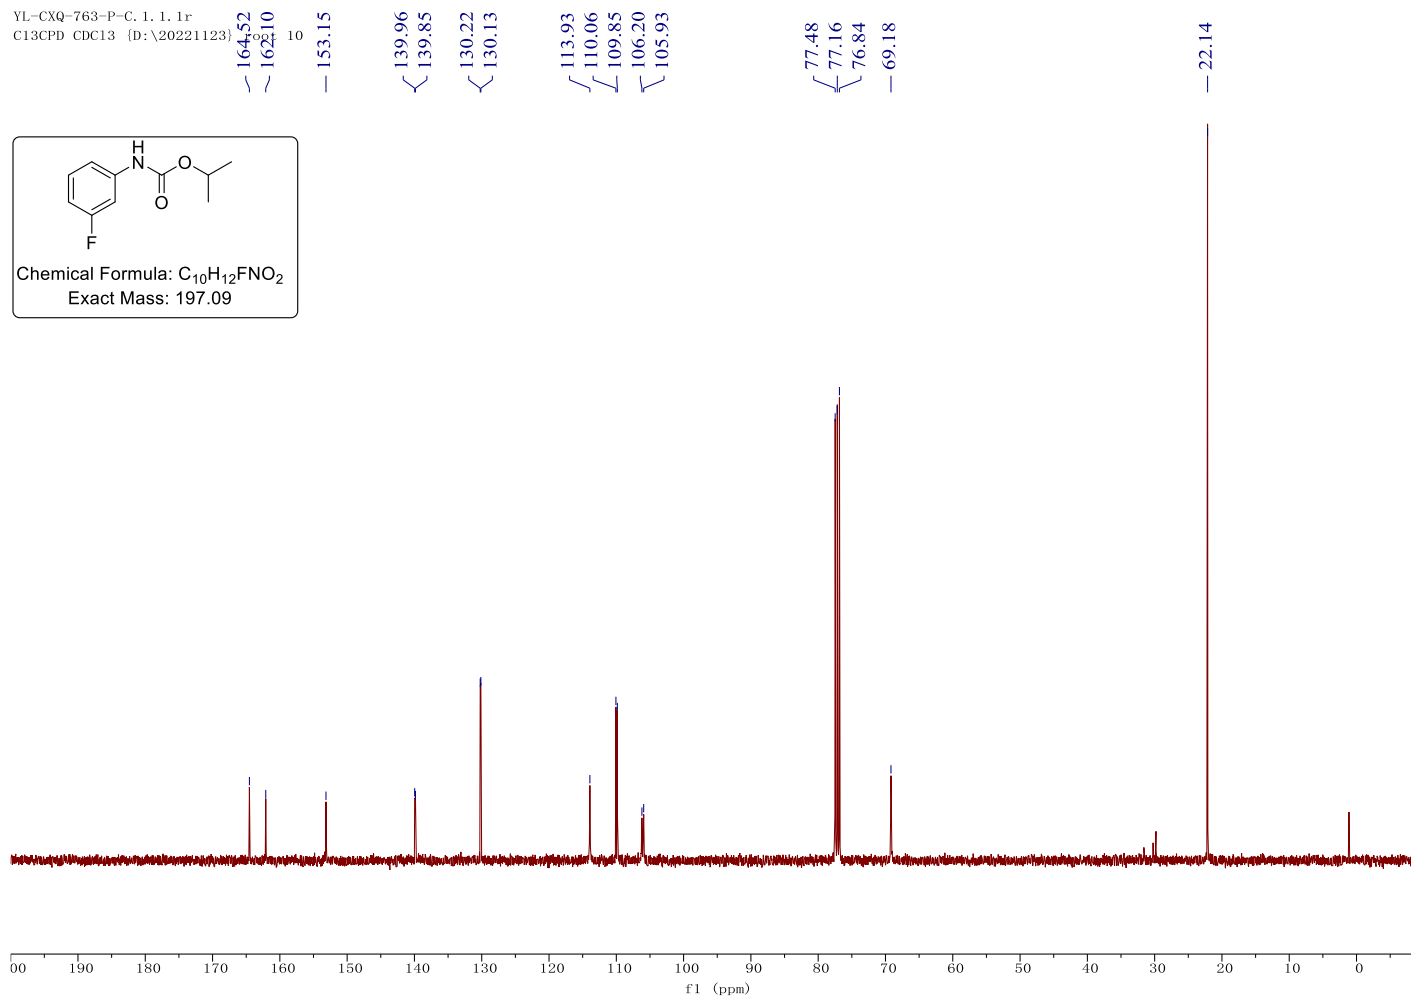

# <sup>1</sup>H NMR (400 MHz, CDCl<sub>3</sub>) spectrum of compound **3ga**.

YL-CXQ-760-P-H.1.fid  
PROTON CDCl<sub>3</sub> [D:\20221120] root 2

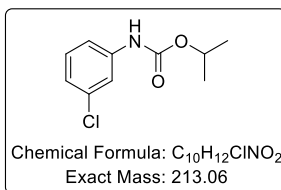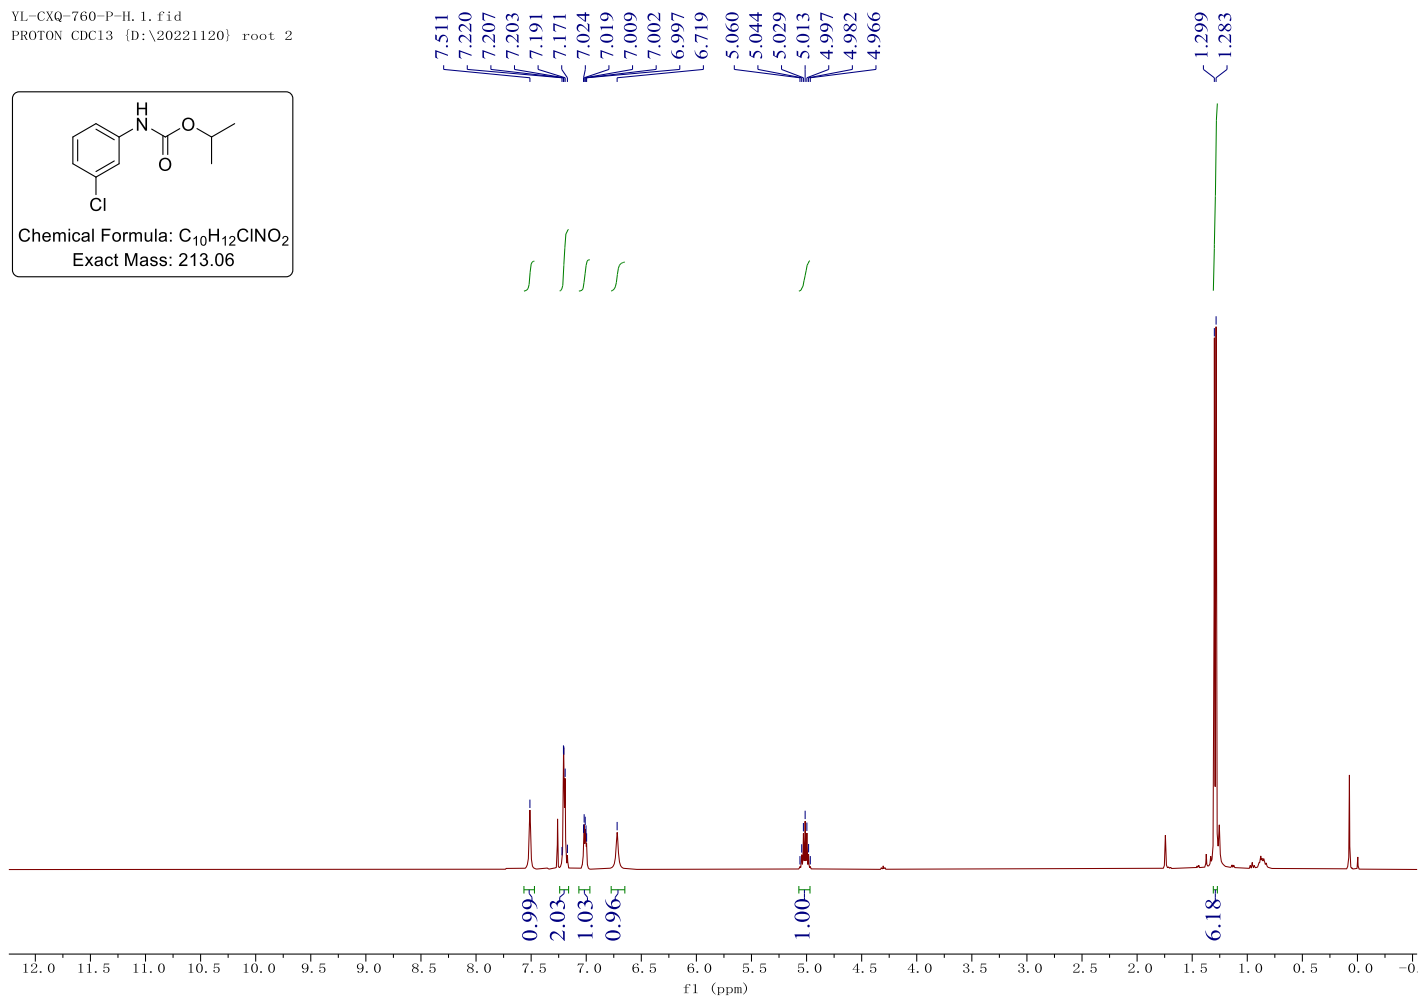

# $^{13}\text{C}\{^1\text{H}\}$ NMR (101 MHz, $\text{CDCl}_3$ ) spectrum of compound **3ga**.

YL-CXQ-760-P-C.1.fid  
C13CPD CDC13 [D:\20230215] root 12

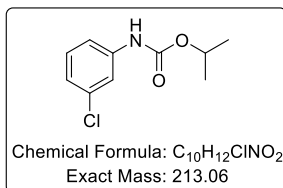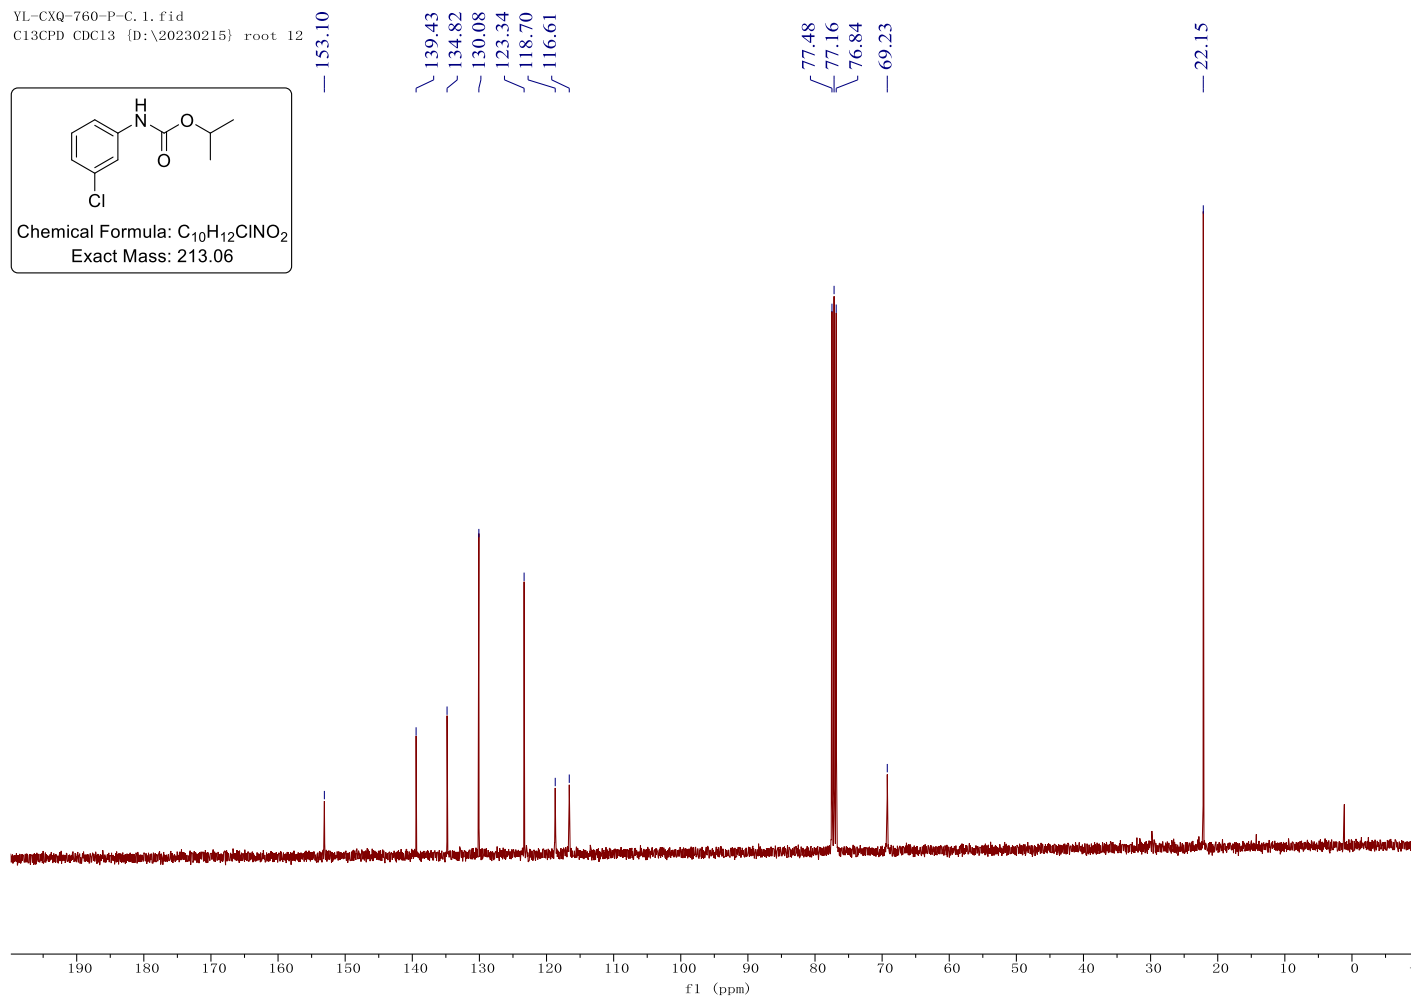

# <sup>1</sup>H NMR (400 MHz, CDCl<sub>3</sub>) spectrum of compound **3ha**.

YL-CXQ-774-P-H. 1. fid  
PROTON CDCl<sub>3</sub> [D:\20221123] root 5

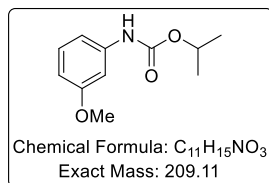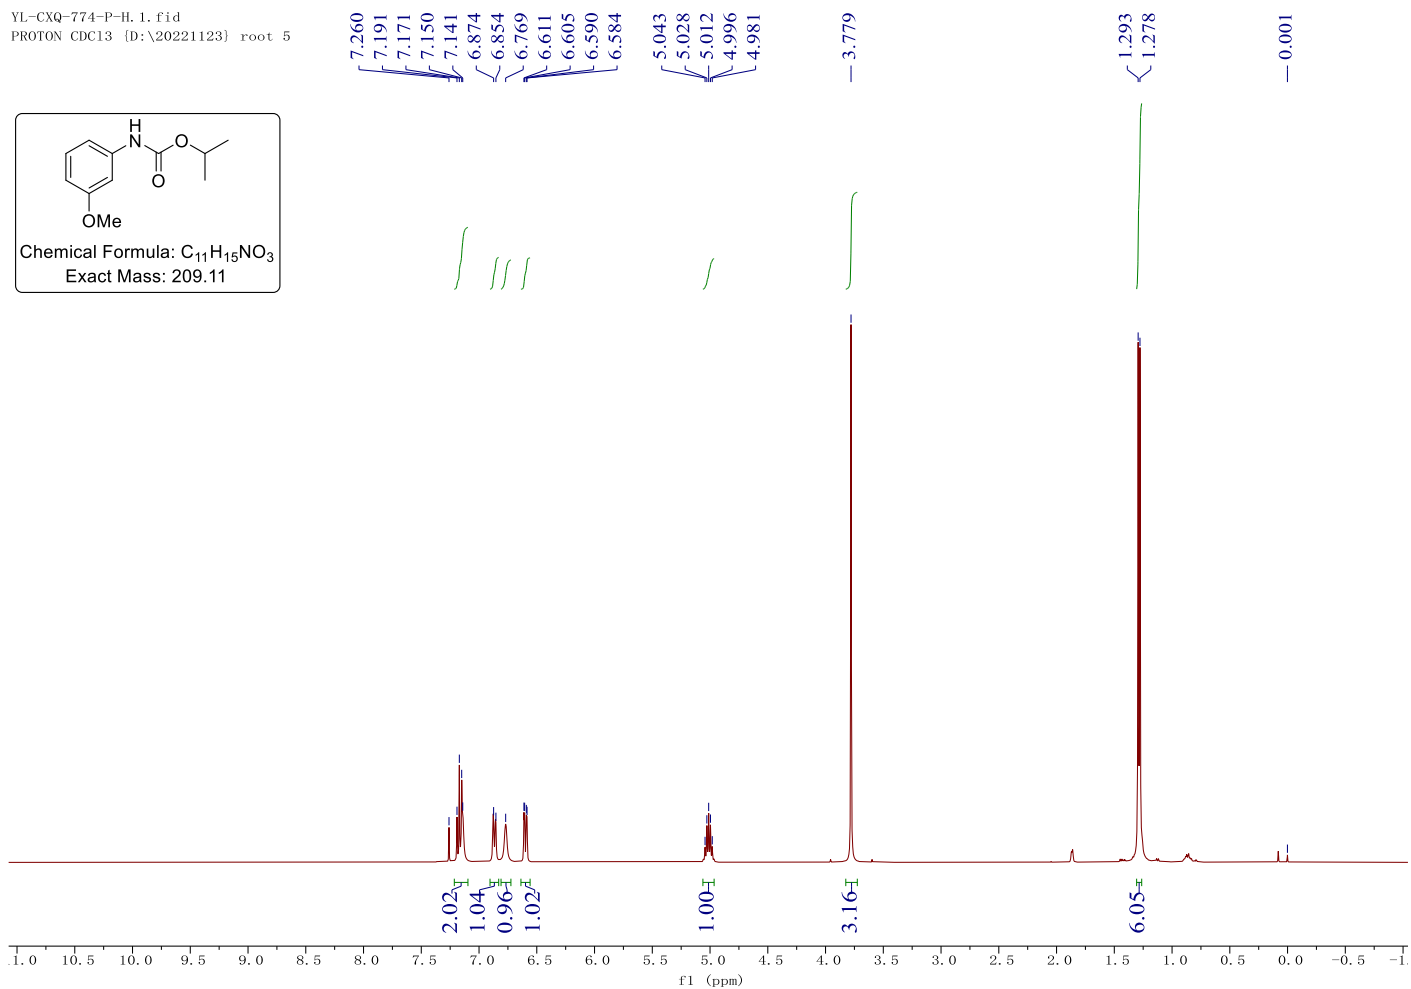

$^{13}\text{C}\{^1\text{H}\}$  NMR (101 MHz,  $\text{CDCl}_3$ ) spectrum of compound **3ha**.

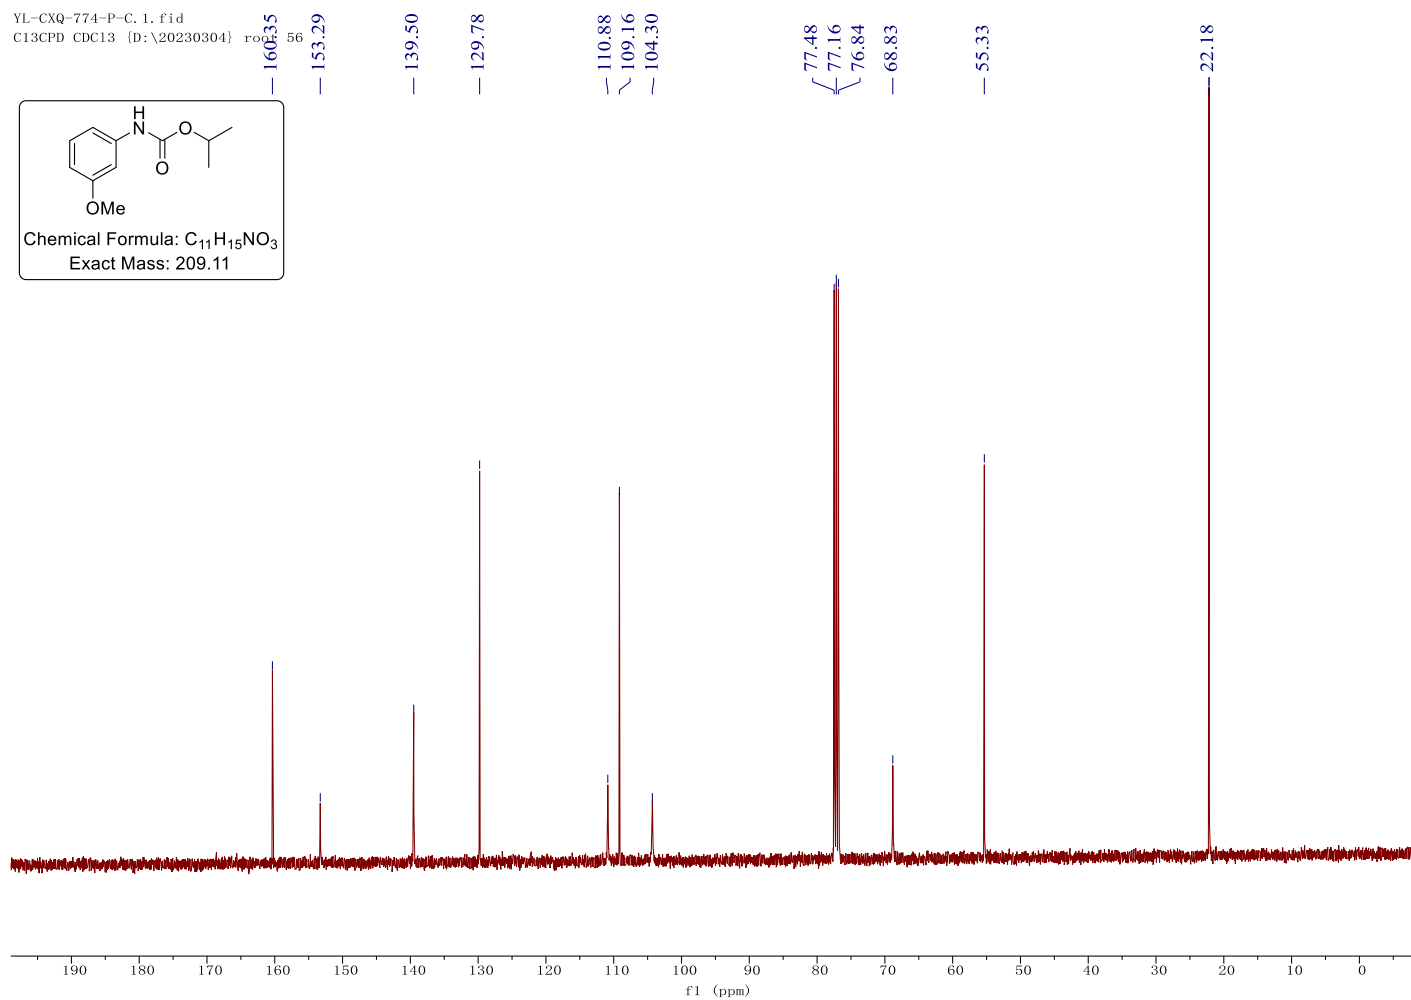

# <sup>1</sup>H NMR (400 MHz, CDCl<sub>3</sub>) spectrum of compound **3ia**.

YL-CXQ-776-P-H.1.fid  
PROTON CDCl<sub>3</sub> (D:\20221127) root 3

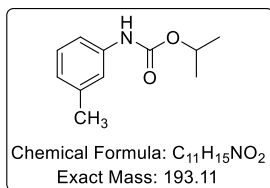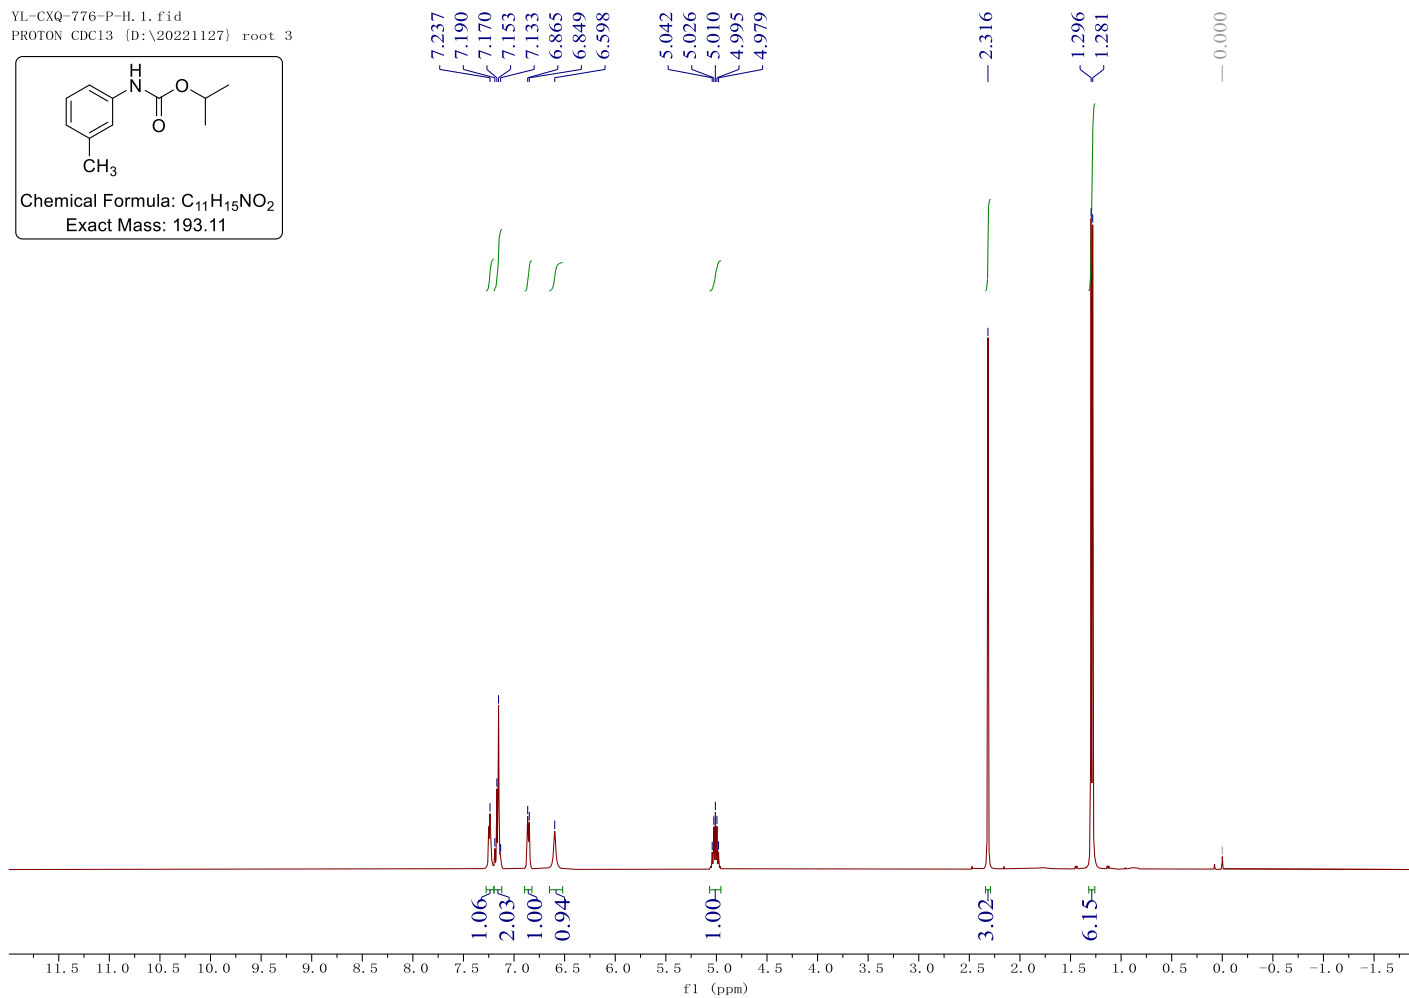

**$^{13}\text{C}\{^1\text{H}\}$  NMR (101 MHz,  $\text{CDCl}_3$ ) spectrum of compound **3ia**.**

YL-CXQ-776-P-C.1.fid  
C13CPD CDCl3 [D:\20230215] root 14

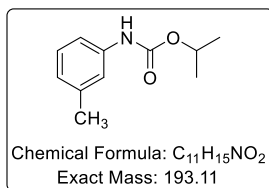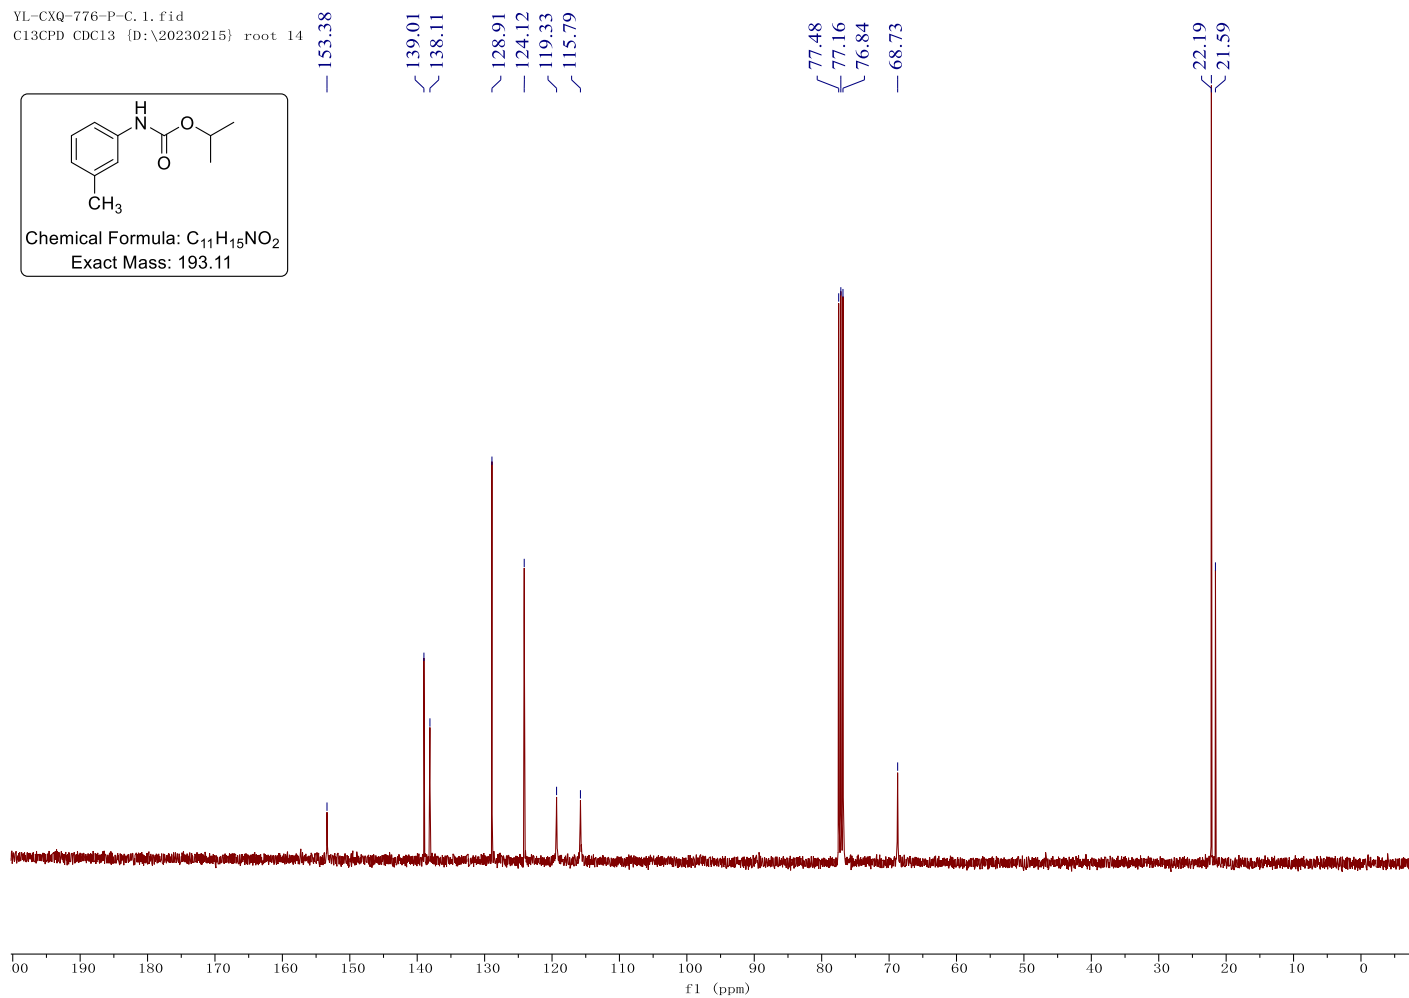



# <sup>1</sup>H NMR (400 MHz, CDCl<sub>3</sub>) spectrum of compound **3ja**.

YL-CXQ-769-P-H.1.fid  
PROTON CDCl<sub>3</sub> [D:\20221123] root 2

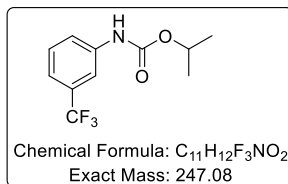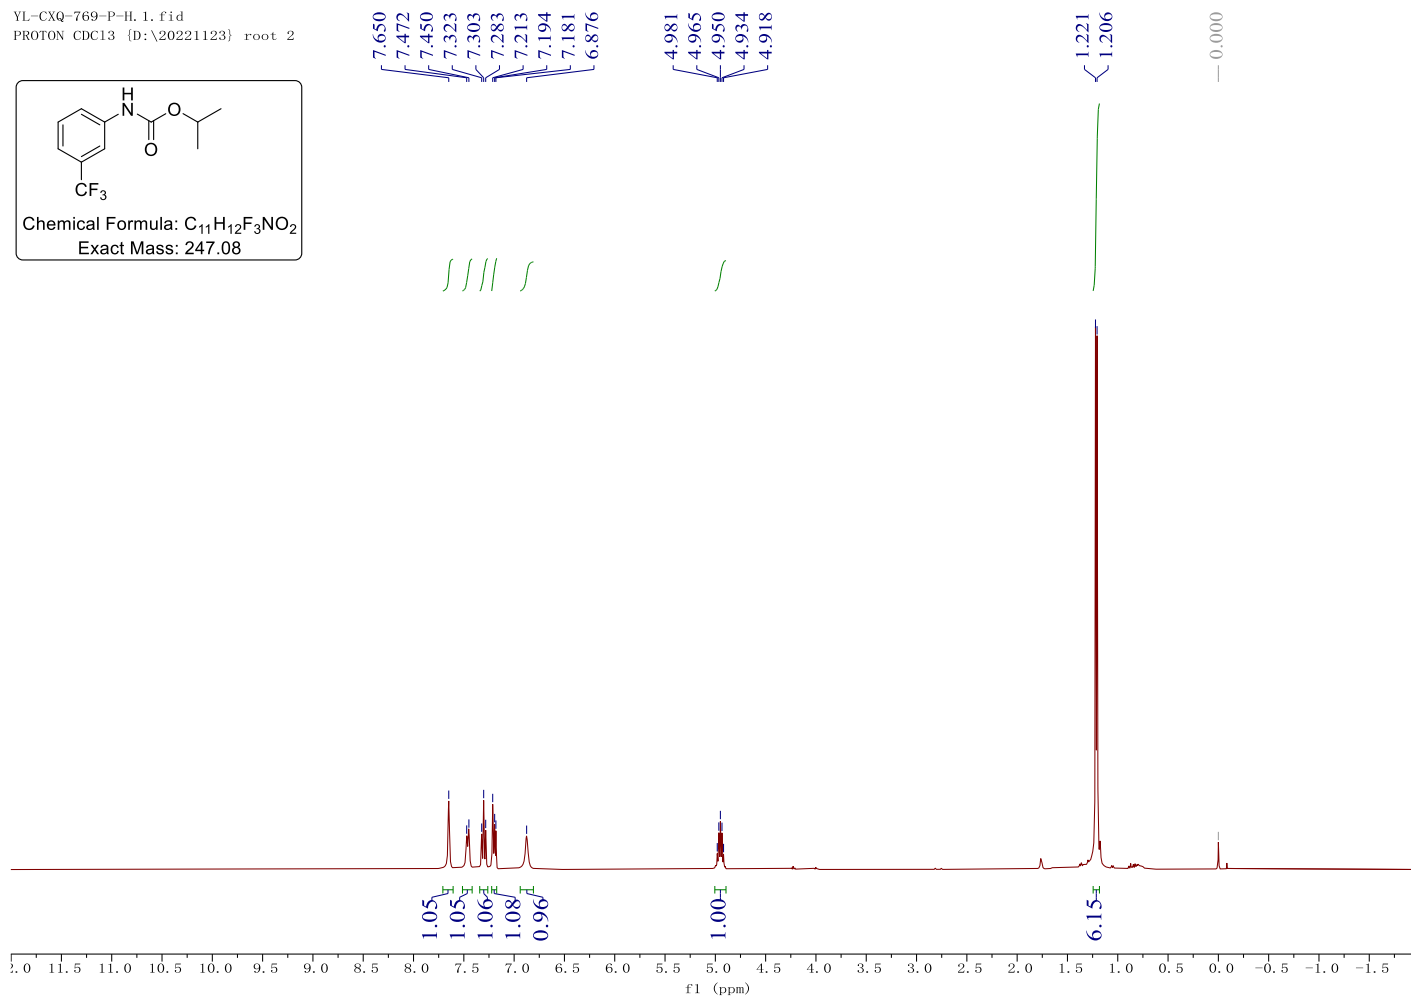

**$^{13}\text{C}\{^1\text{H}\}$  NMR (101 MHz,  $\text{CDCl}_3$ ) spectrum of compound **3ja**.**

YL-CXQ-769-P-C. 1. 1. 1r  
C13CPD CDCl3 [D:\20221127] root 8

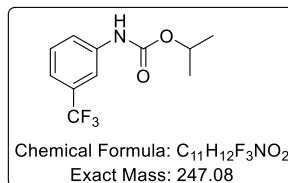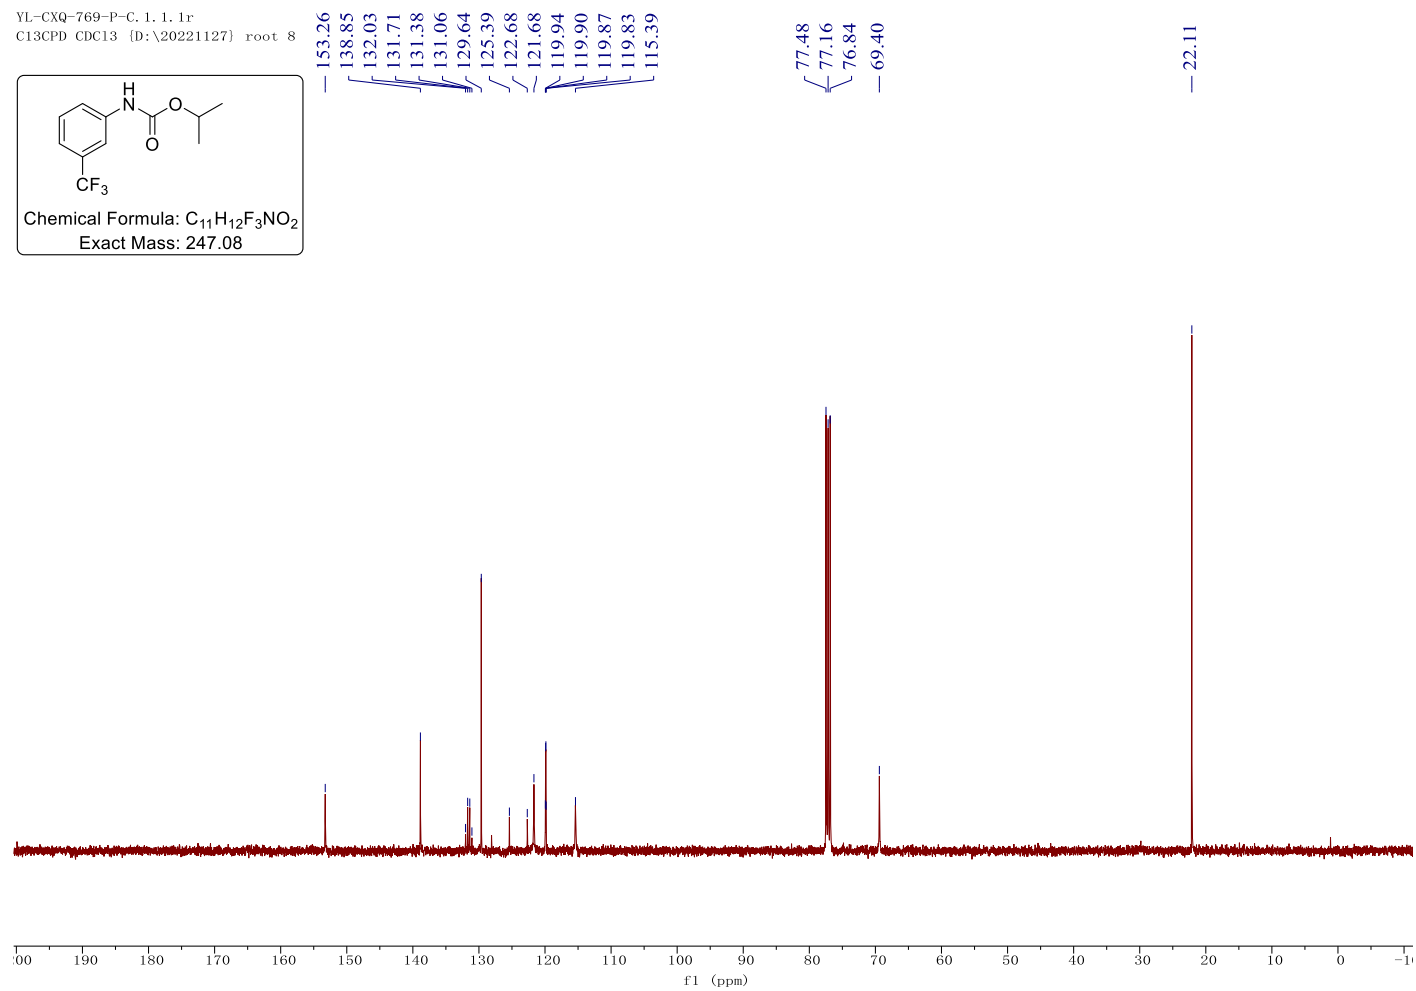

# <sup>1</sup>H NMR (400 MHz, CDCl<sub>3</sub>) spectrum of compound **3ka**.

YL-CXQ-754-P-H.1.fid  
PROTON CDCl<sub>3</sub> {D:\20221117} root 6

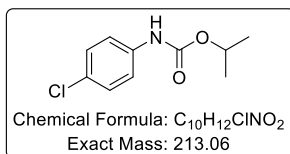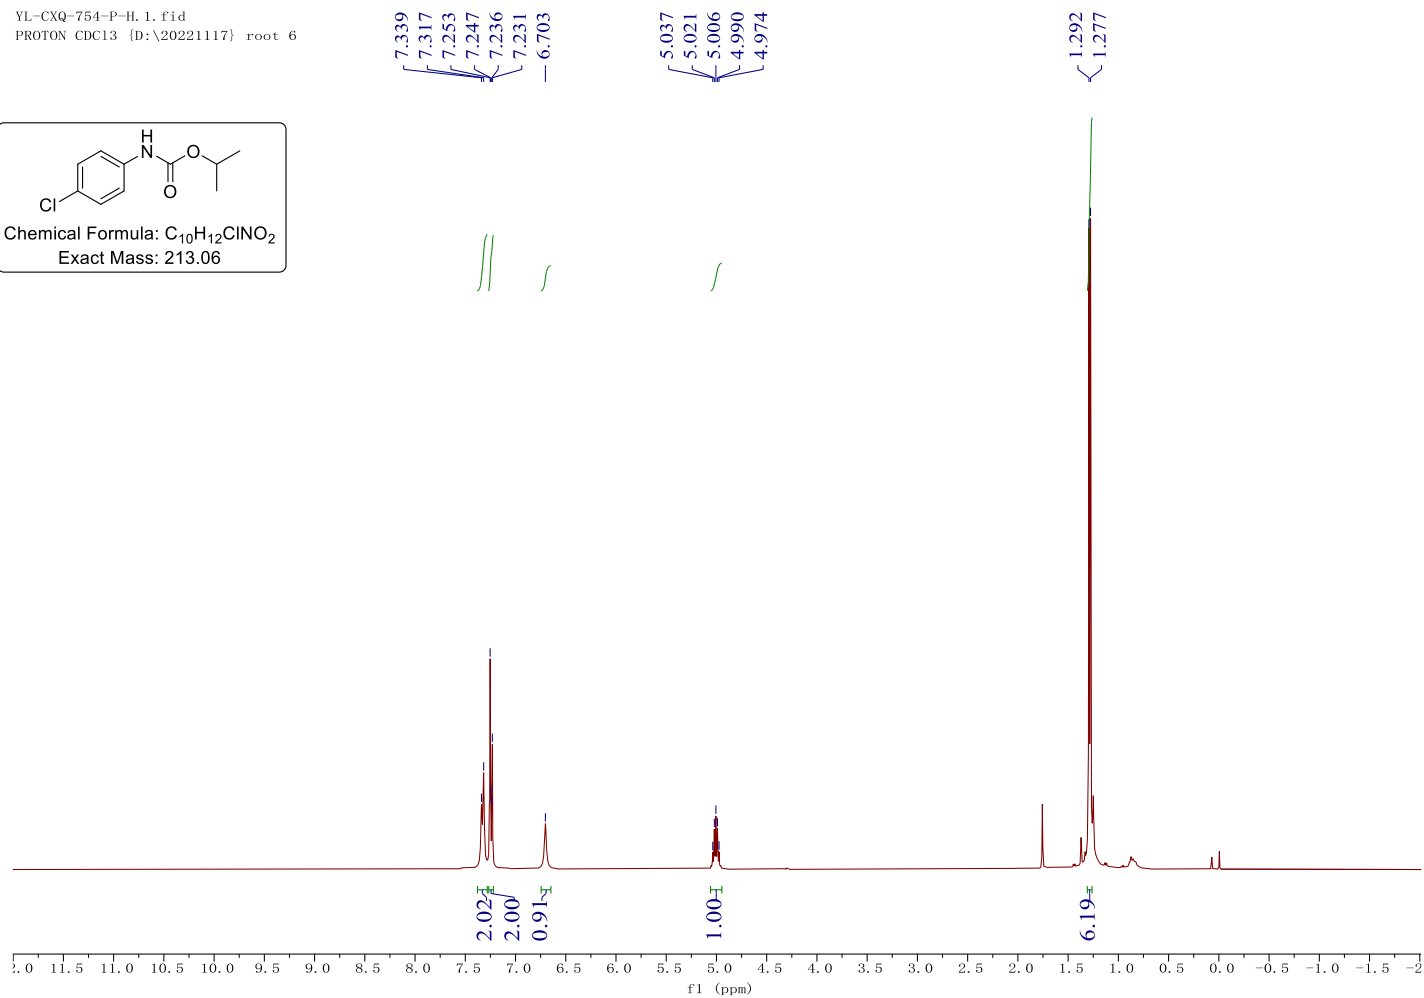

**$^{13}\text{C}\{^1\text{H}\}$  NMR (101 MHz,  $\text{CDCl}_3$ ) spectrum of compound **3ka**.**

YL-CXQ-754-P-C. 1. 1. 1r  
C13CPD CDCl3 {D:\20221123} root 7

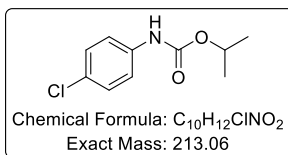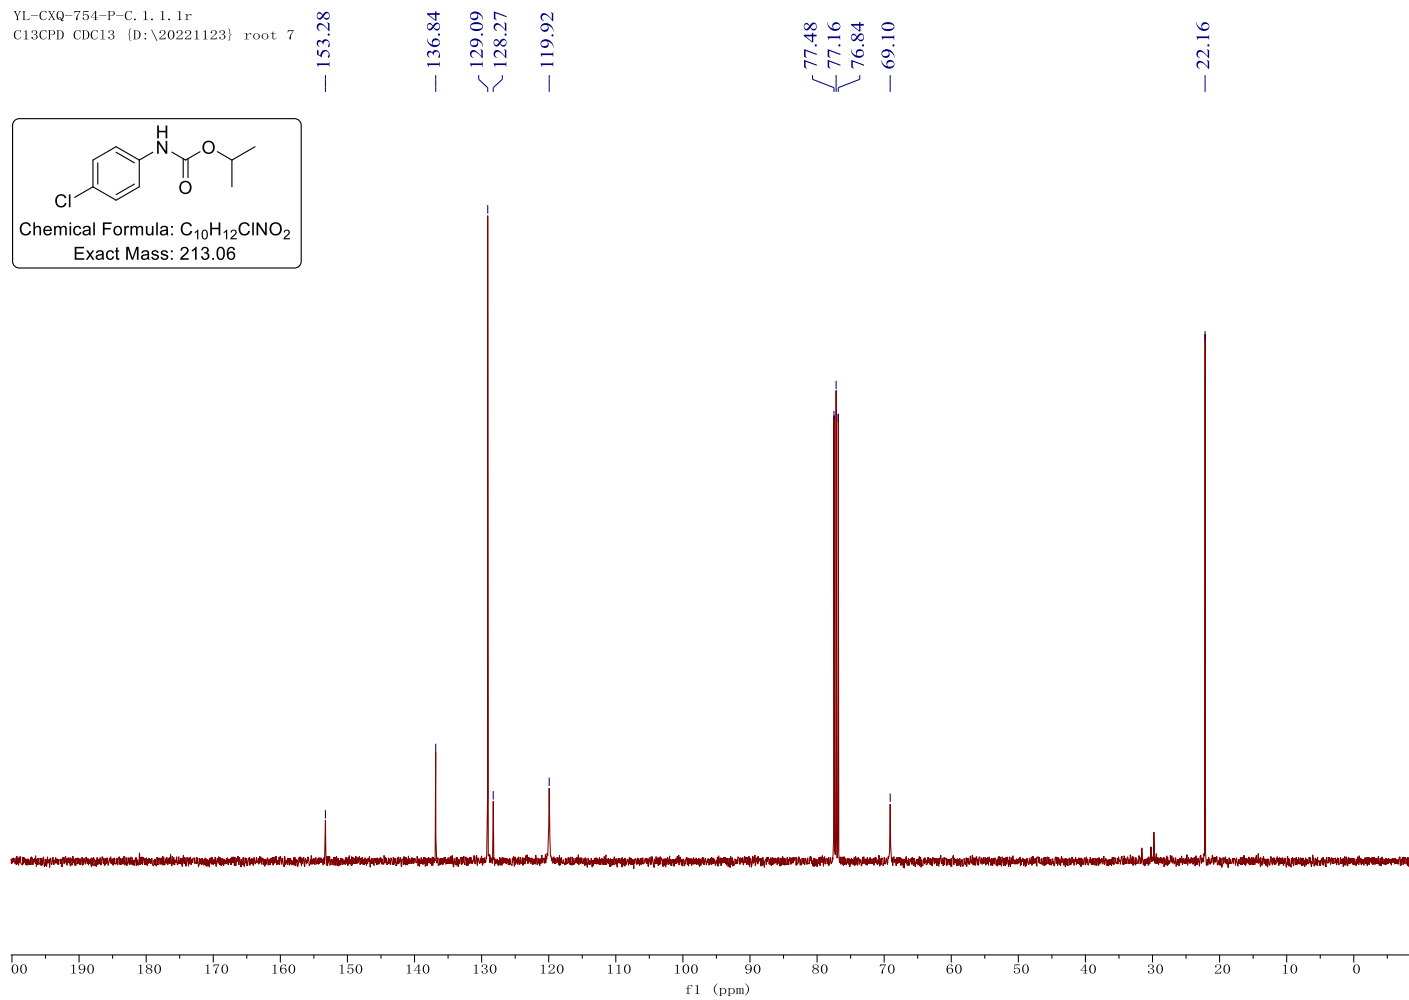

# <sup>1</sup>H NMR (400 MHz, CDCl<sub>3</sub>) spectrum of compound **3la**.

YL-CXQ-770-P-H.1.fid  
PROTON CDC13 {D:\20221127} root 7

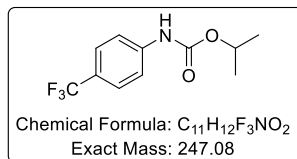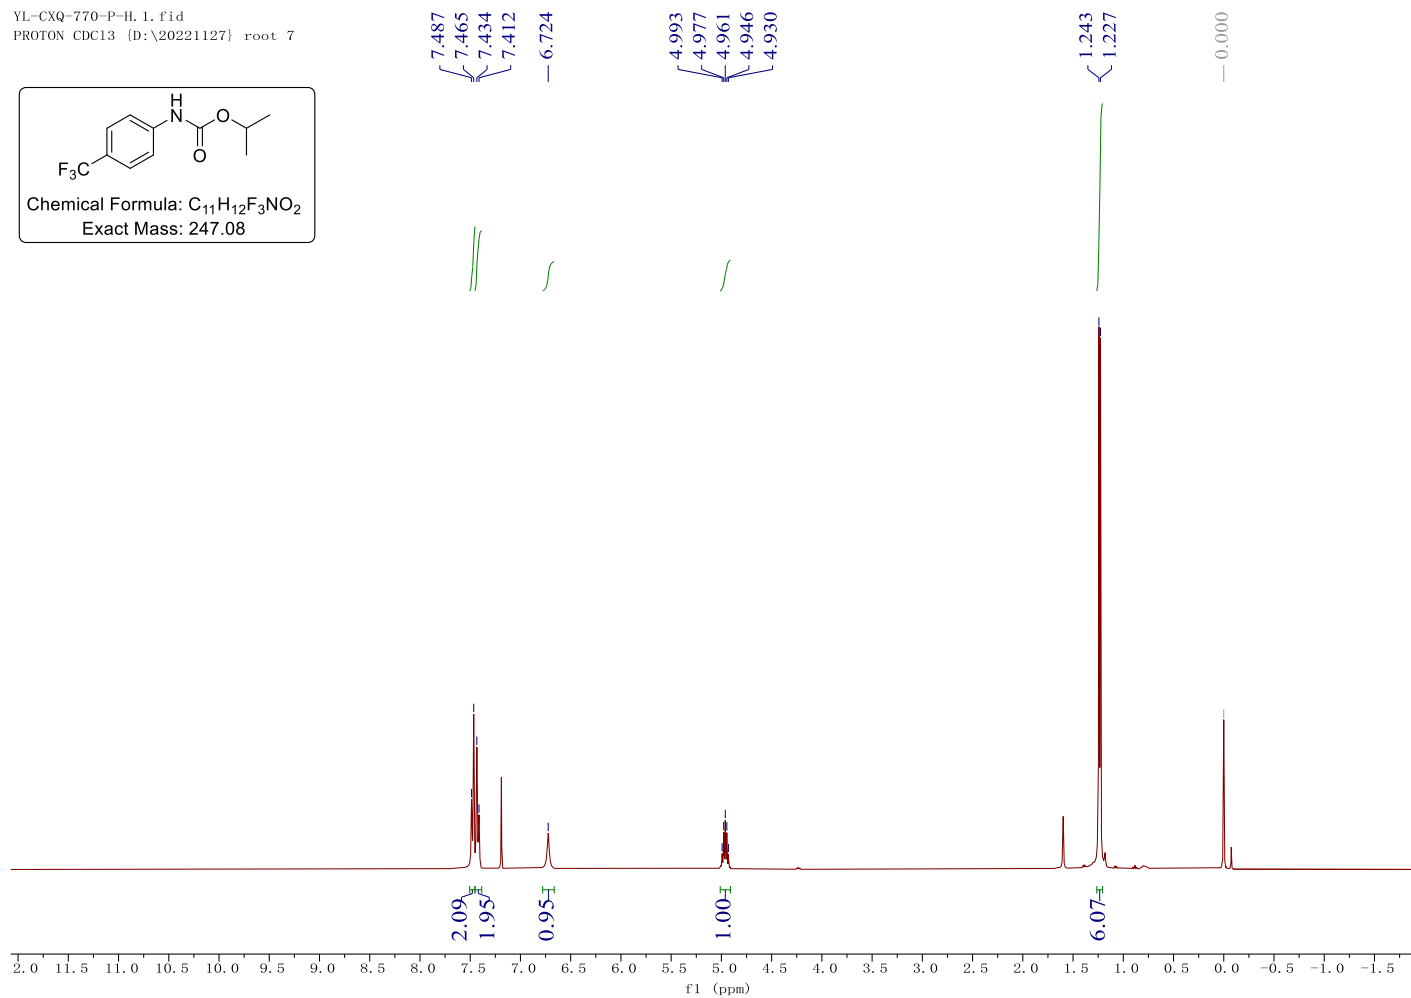

**$^{13}\text{C}\{^1\text{H}\}$  NMR (101 MHz,  $\text{CDCl}_3$ ) spectrum of compound **3la**.**

YL-WL-240-C. 1. fid  
C13CPD CDC13 {D:\20231227} root 29

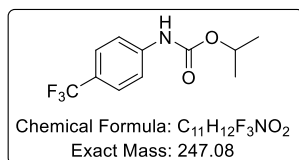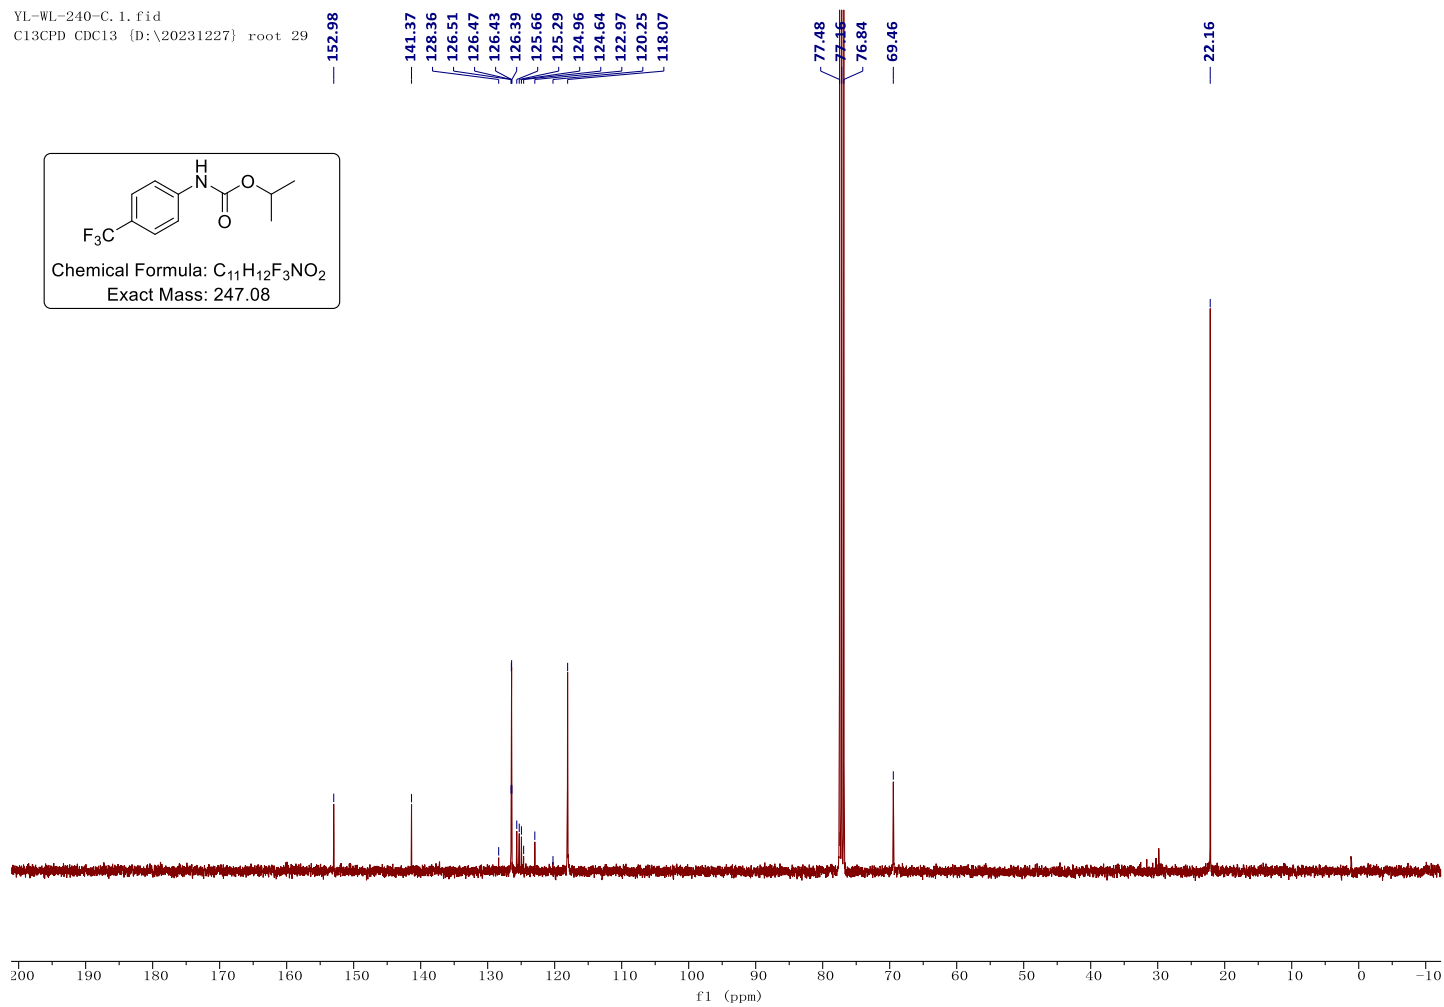

**<sup>1</sup>H NMR (400 MHz, CDCl<sub>3</sub>) spectrum of compound 3ma.**

YL-CXQ-778-P-H.1.fid  
PROTON CDCl3 {D:\20221127} root 5

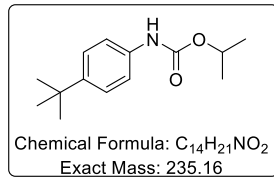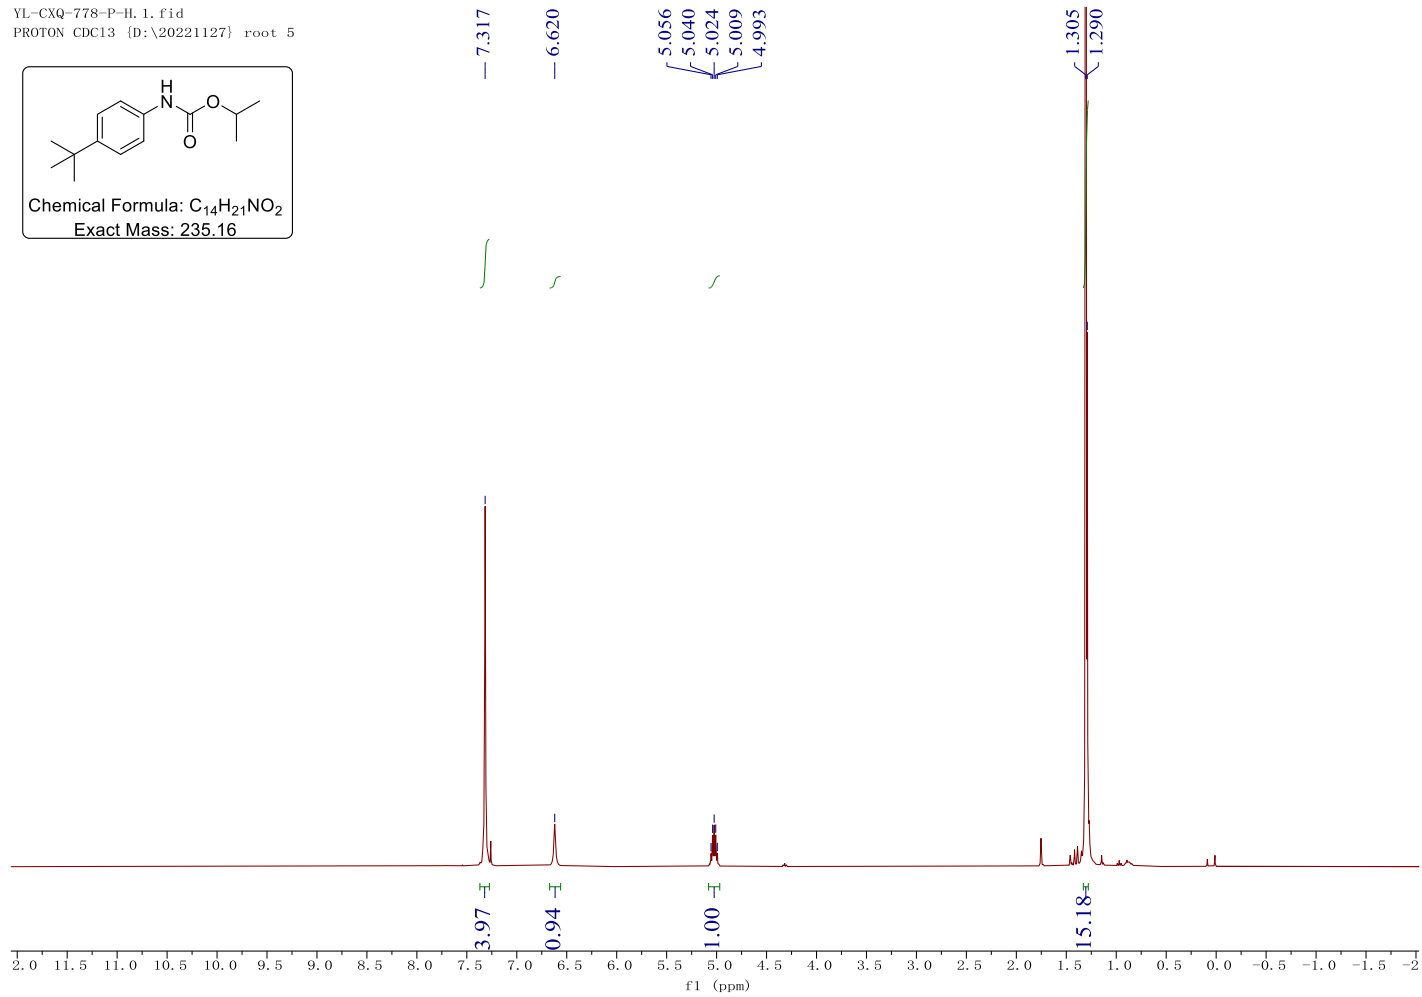

# $^{13}\text{C}\{^1\text{H}\}$ NMR (101 MHz, $\text{CDCl}_3$ ) spectrum of compound **3ma**.

YL-CXQ-778-P-C. 2. 1. 1r  
C13CPD CDCl3 [D:\20221210] root 51

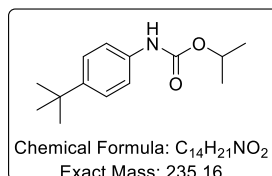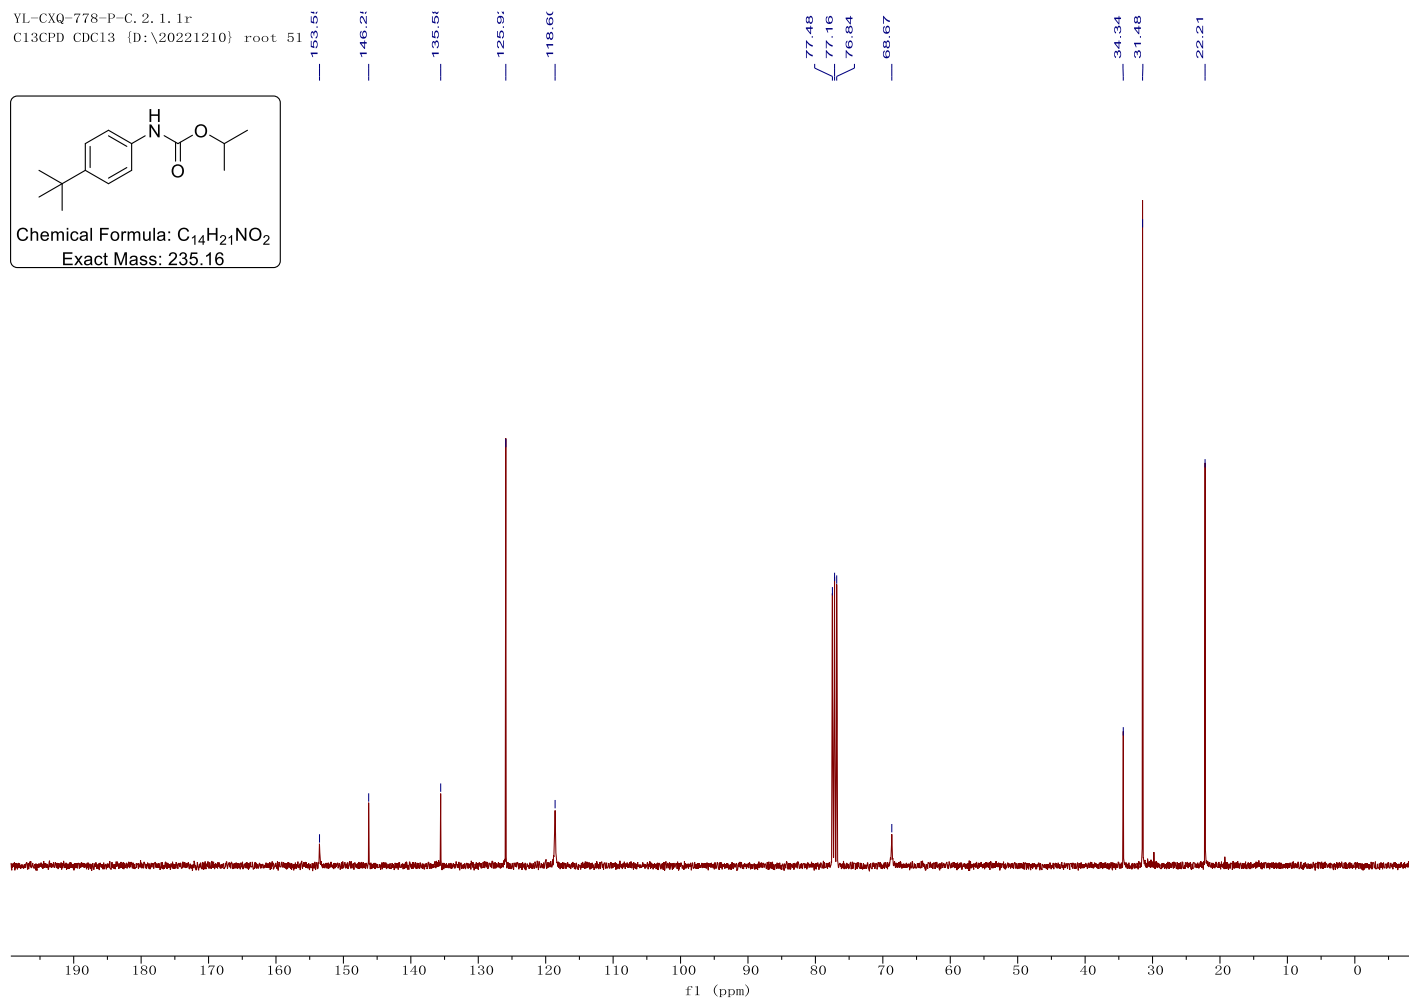



# <sup>1</sup>H NMR (400 MHz, CDCl<sub>3</sub>) spectrum of compound **3na**.

YL-CXQ-777-P-H.1.fid  
PROTON CDCl<sub>3</sub> {D:\20221127} root 4

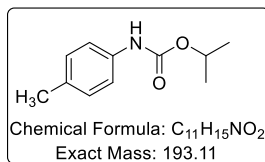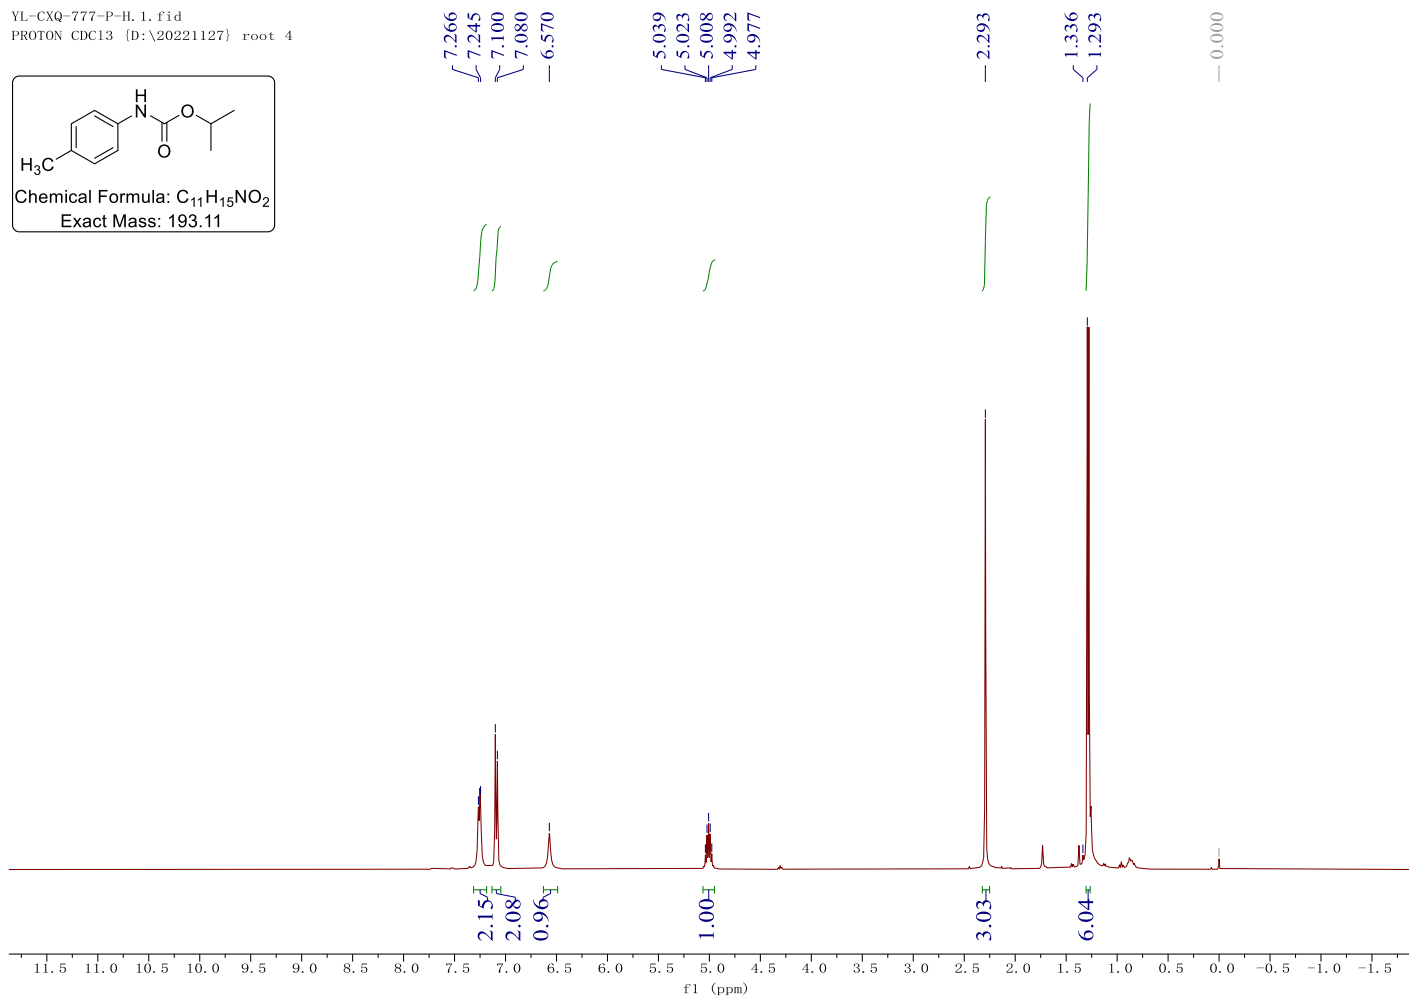

**$^{13}\text{C}\{^1\text{H}\}$  NMR (101 MHz,  $\text{CDCl}_3$ ) spectrum of compound **3na**.**

YL-CXQ-777-P-C. 2. 1. 1r  
C13CPD CDCl3 {D:\20221210} root 50

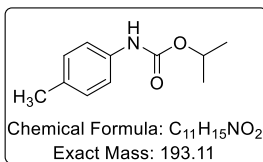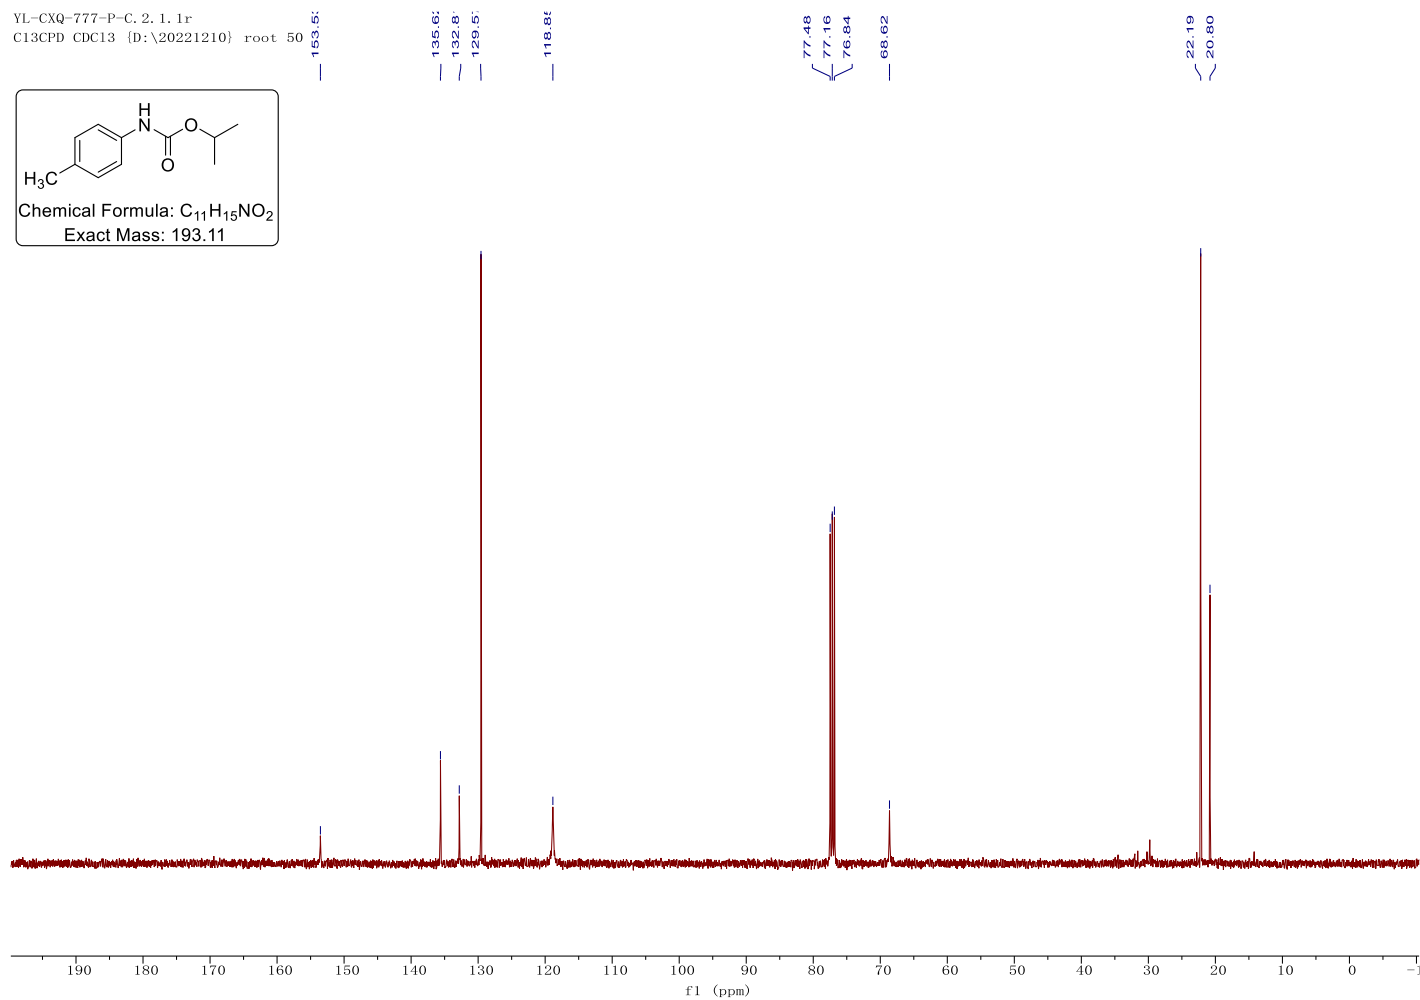

# <sup>1</sup>H NMR (400 MHz, CDCl<sub>3</sub>) spectrum of compound **30a**.

YL-CXQ-768-P-H. 1. fid  
PROTON CDCl<sub>3</sub> [D:\20221120] root 5

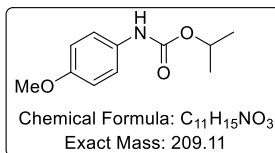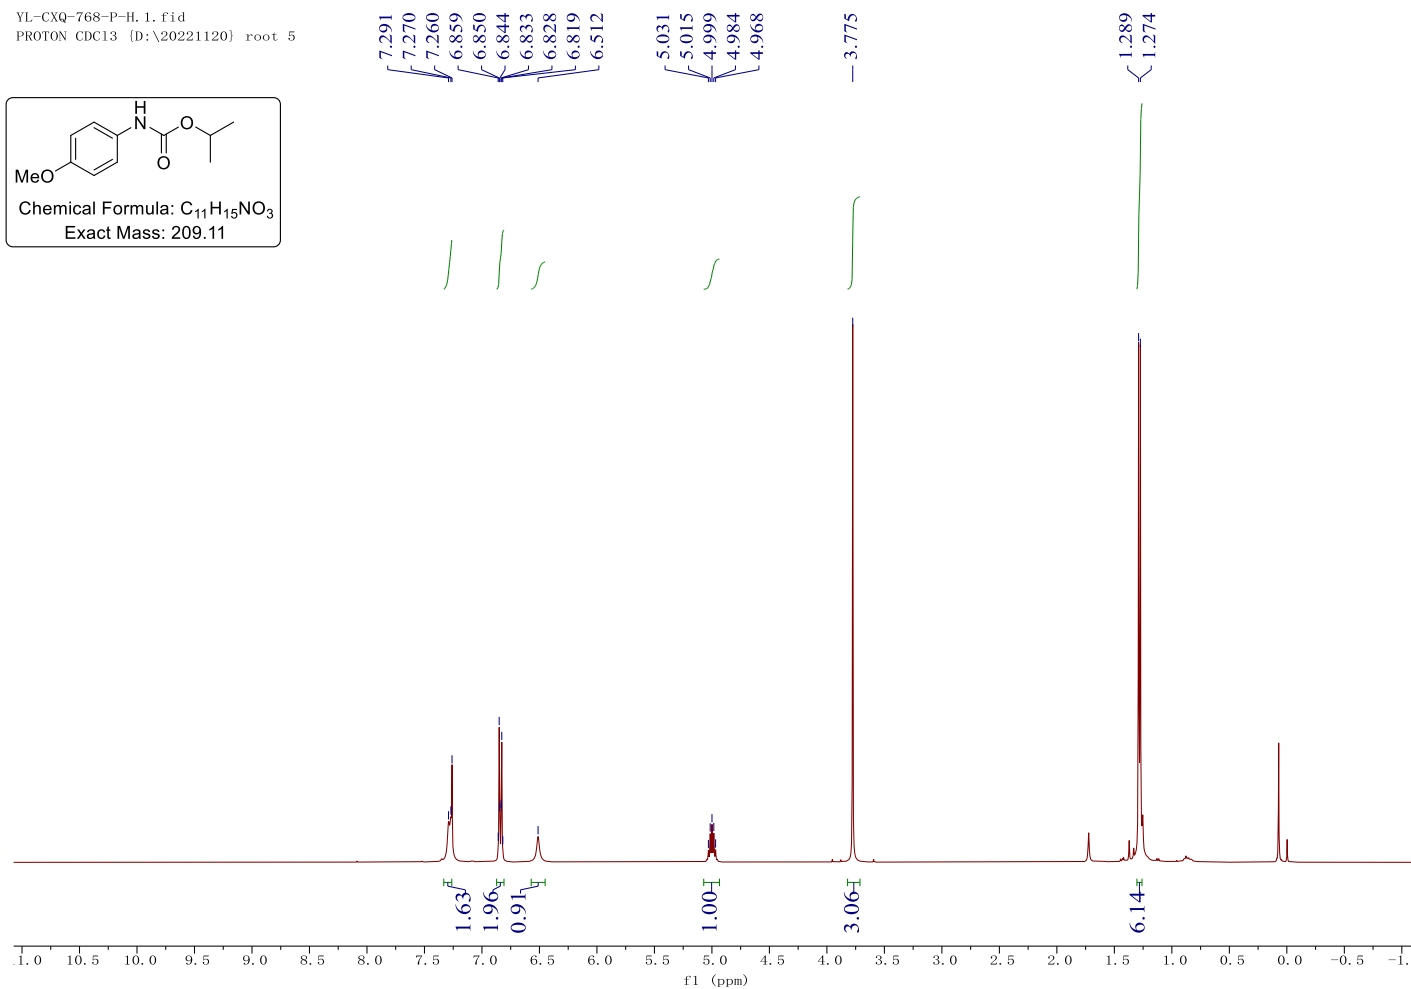

$^{13}\text{C}\{^1\text{H}\}$  NMR (101 MHz,  $\text{CDCl}_3$ ) spectrum of compound **3oa**.

YL-CXQ-768-P-C. 1. 1. 1r  
C13CPD CDC13 (D:\20221123) root 1

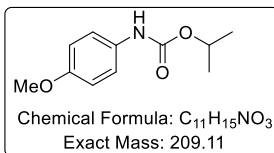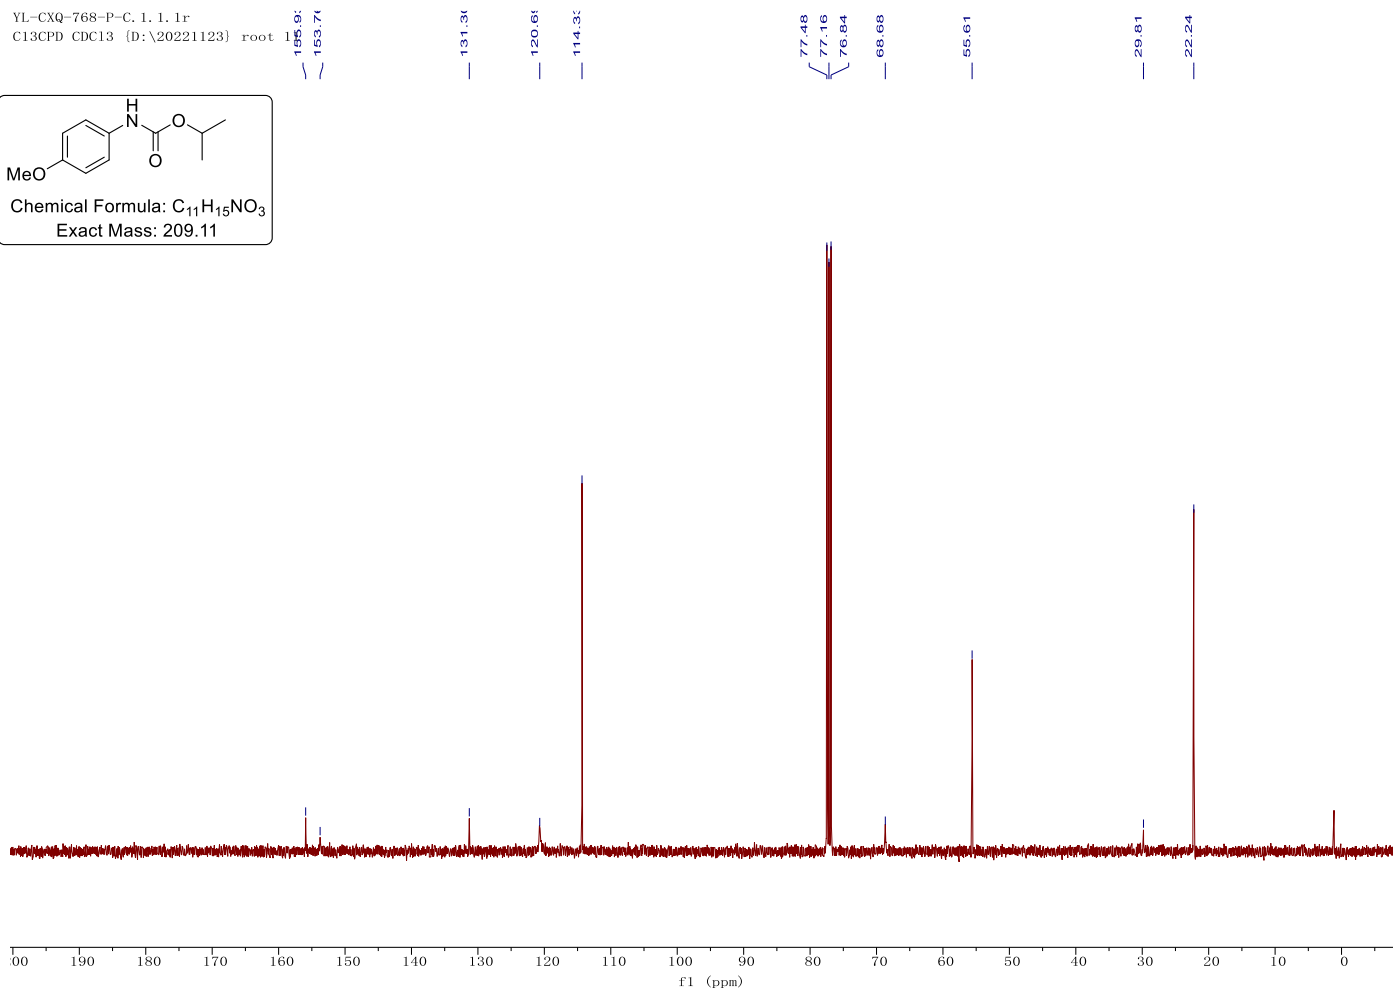

# <sup>1</sup>H NMR (400 MHz, CDCl<sub>3</sub>) spectrum of compound **3pa**.

YL-CXQ-780-P-H.1.fid  
PROTON CDCl<sub>3</sub> [D:\20221127} root 6

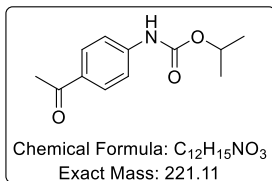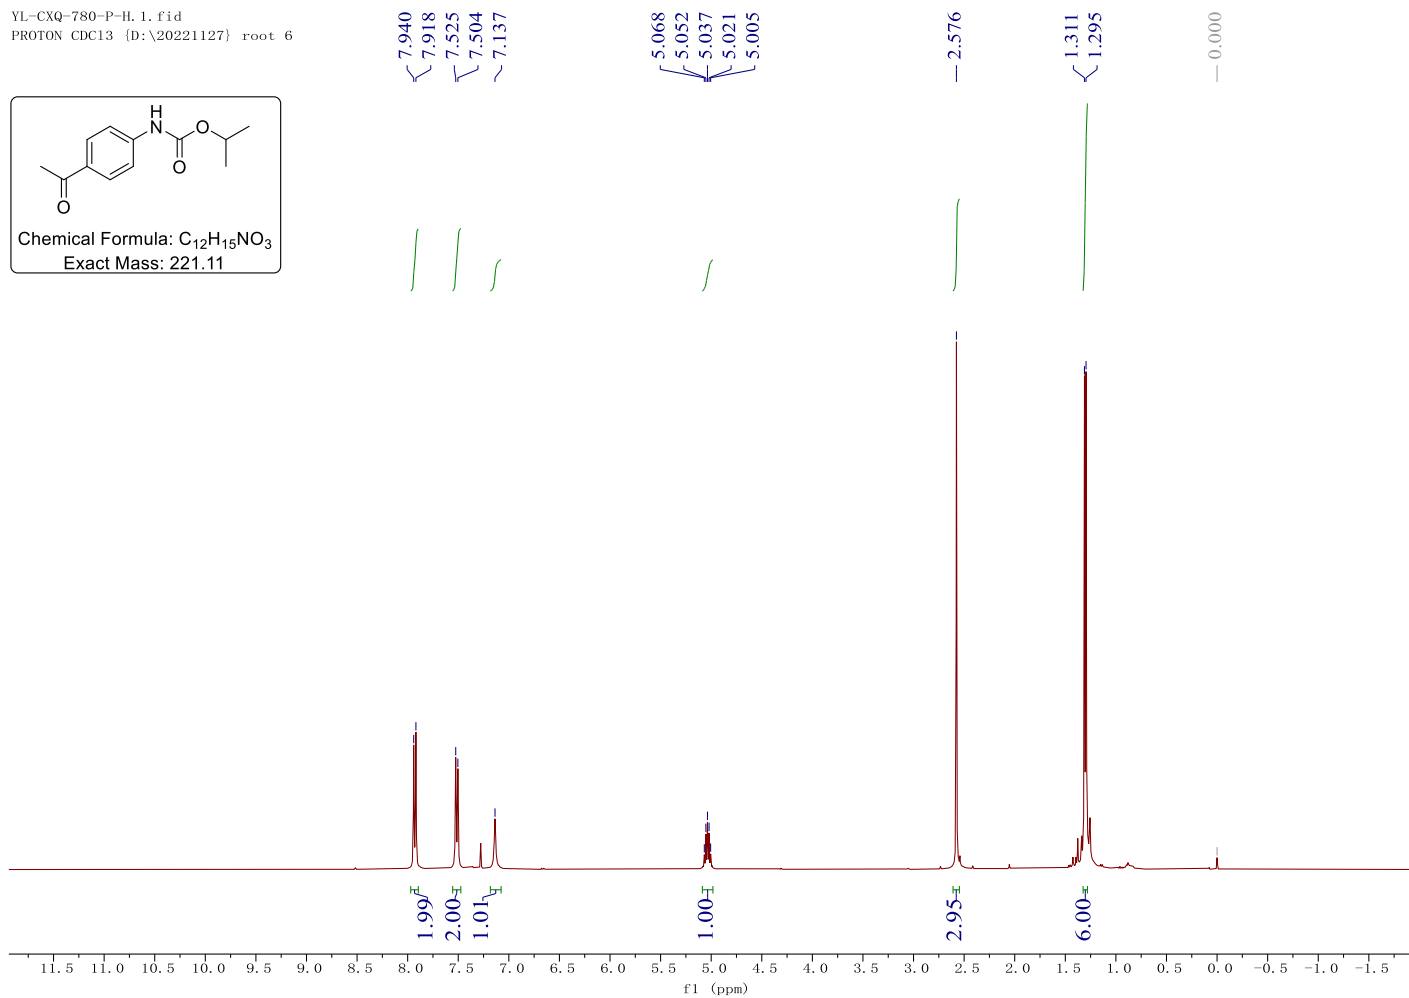

$^{13}\text{C}\{^1\text{H}\}$  NMR (101 MHz,  $\text{CDCl}_3$ ) spectrum of compound **3pa**.

YL-CXQ-760 P-C. 2. 1. 1r  
C13CPD 0013 (D:\20221210) root 52

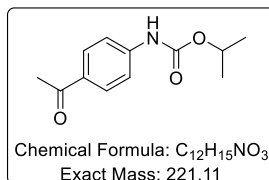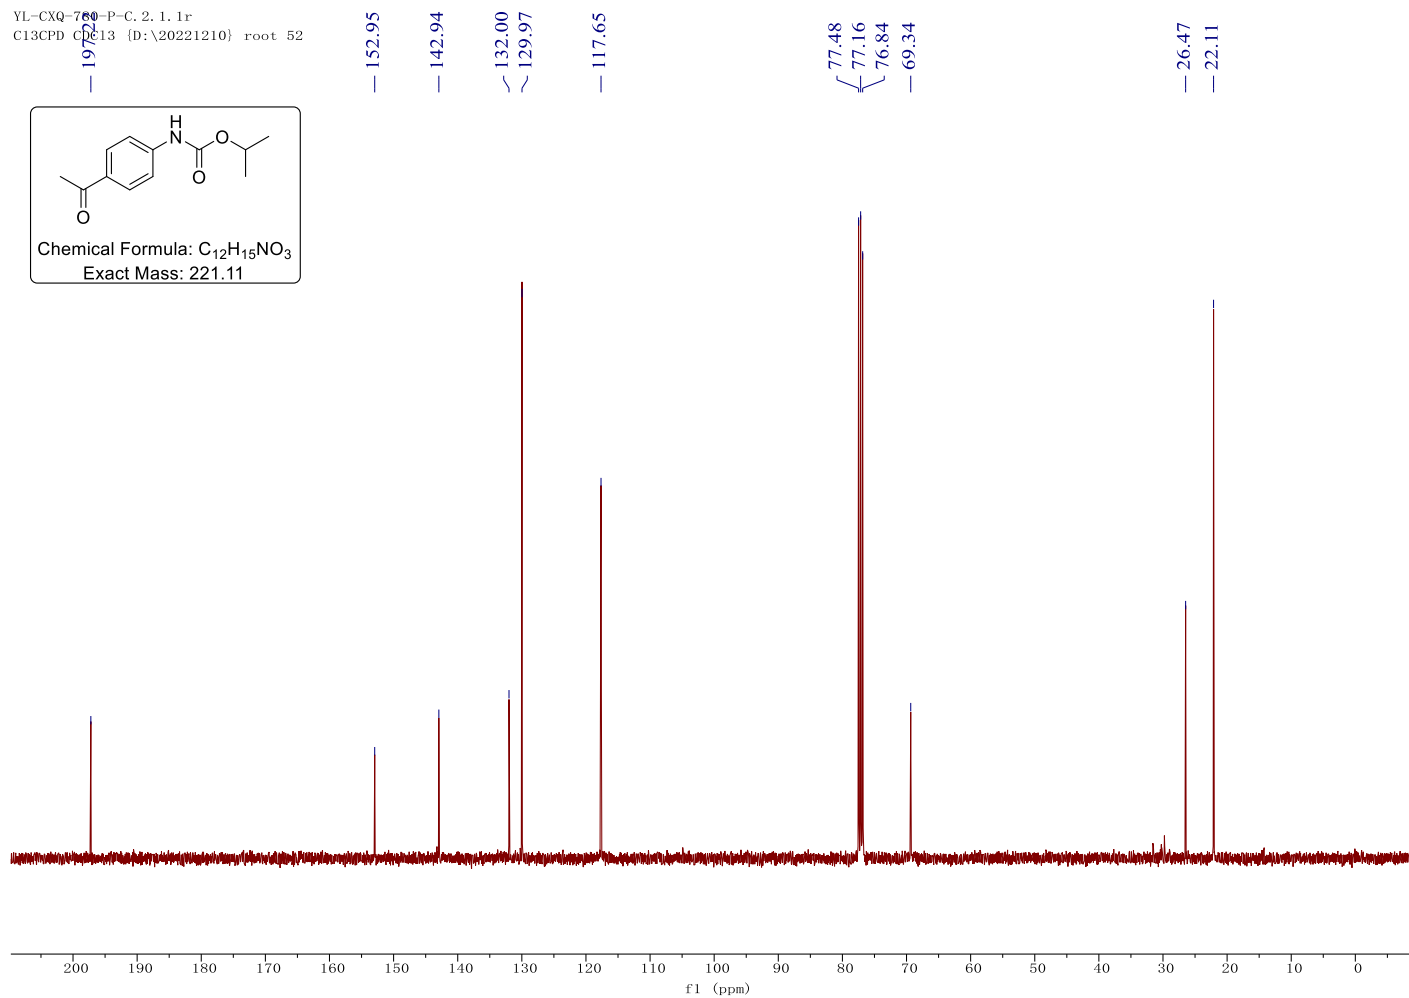

# <sup>1</sup>H NMR (400 MHz, CDCl<sub>3</sub>) spectrum of compound **3qa**.

YL-CXQ-827-P. 1. fid  
PROTON CDCl3 {D:\20230220} root 5

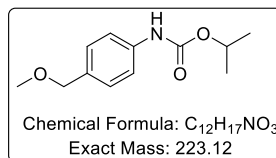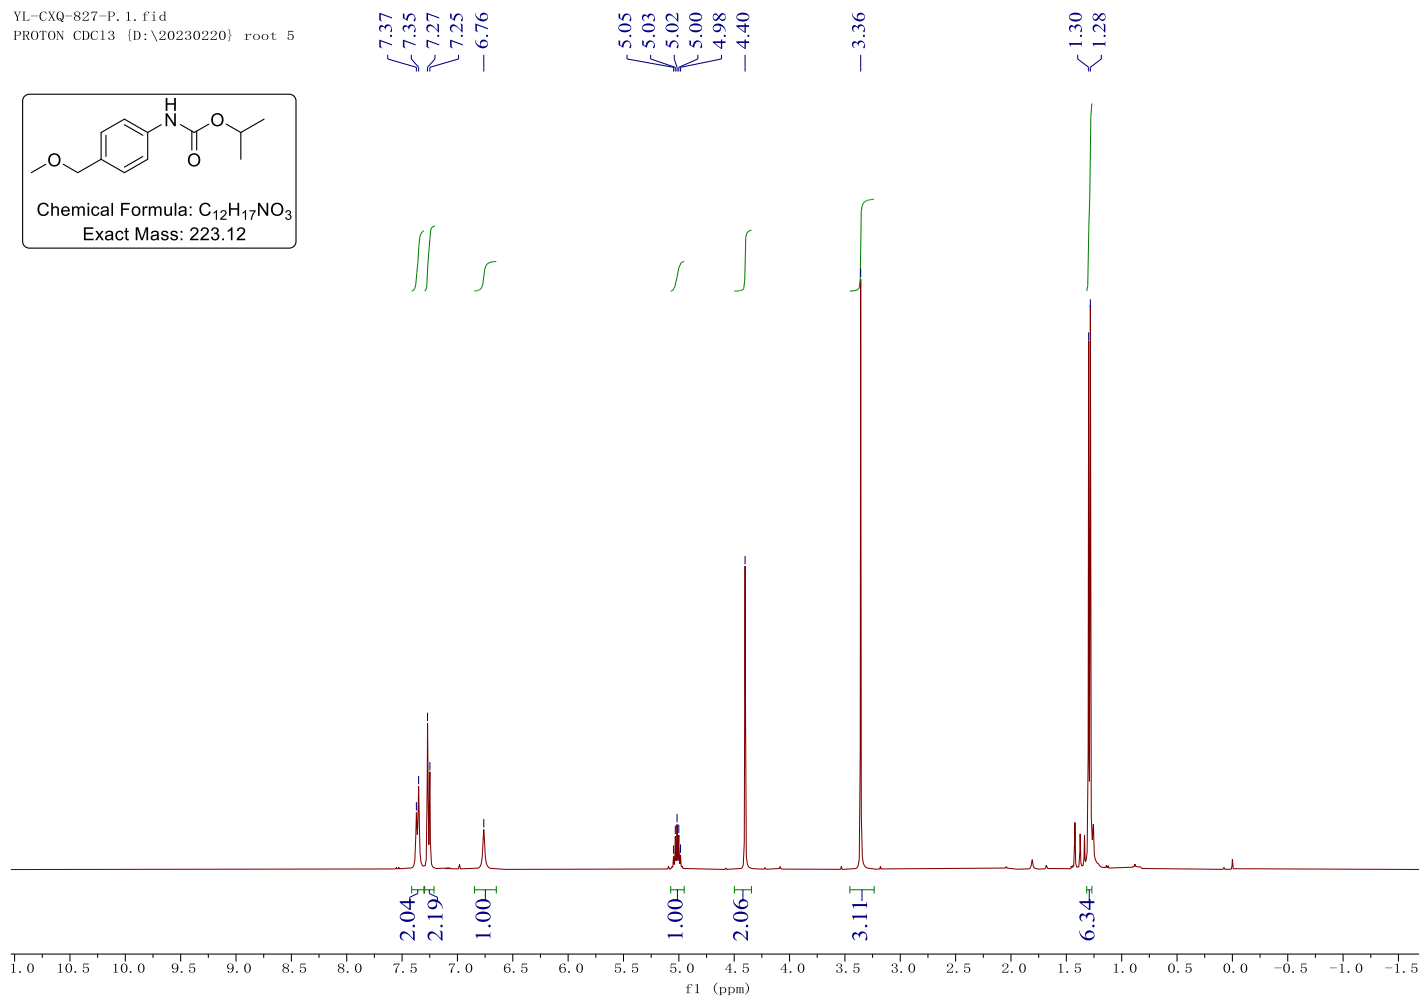

$^{13}\text{C}\{^1\text{H}\}$  NMR (101 MHz,  $\text{CDCl}_3$ ) spectrum of compound **3qa**.

YL-CXQ-827-P. 2. fid  
C13CPD CDC13 {D:\20230220} root 5

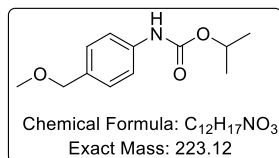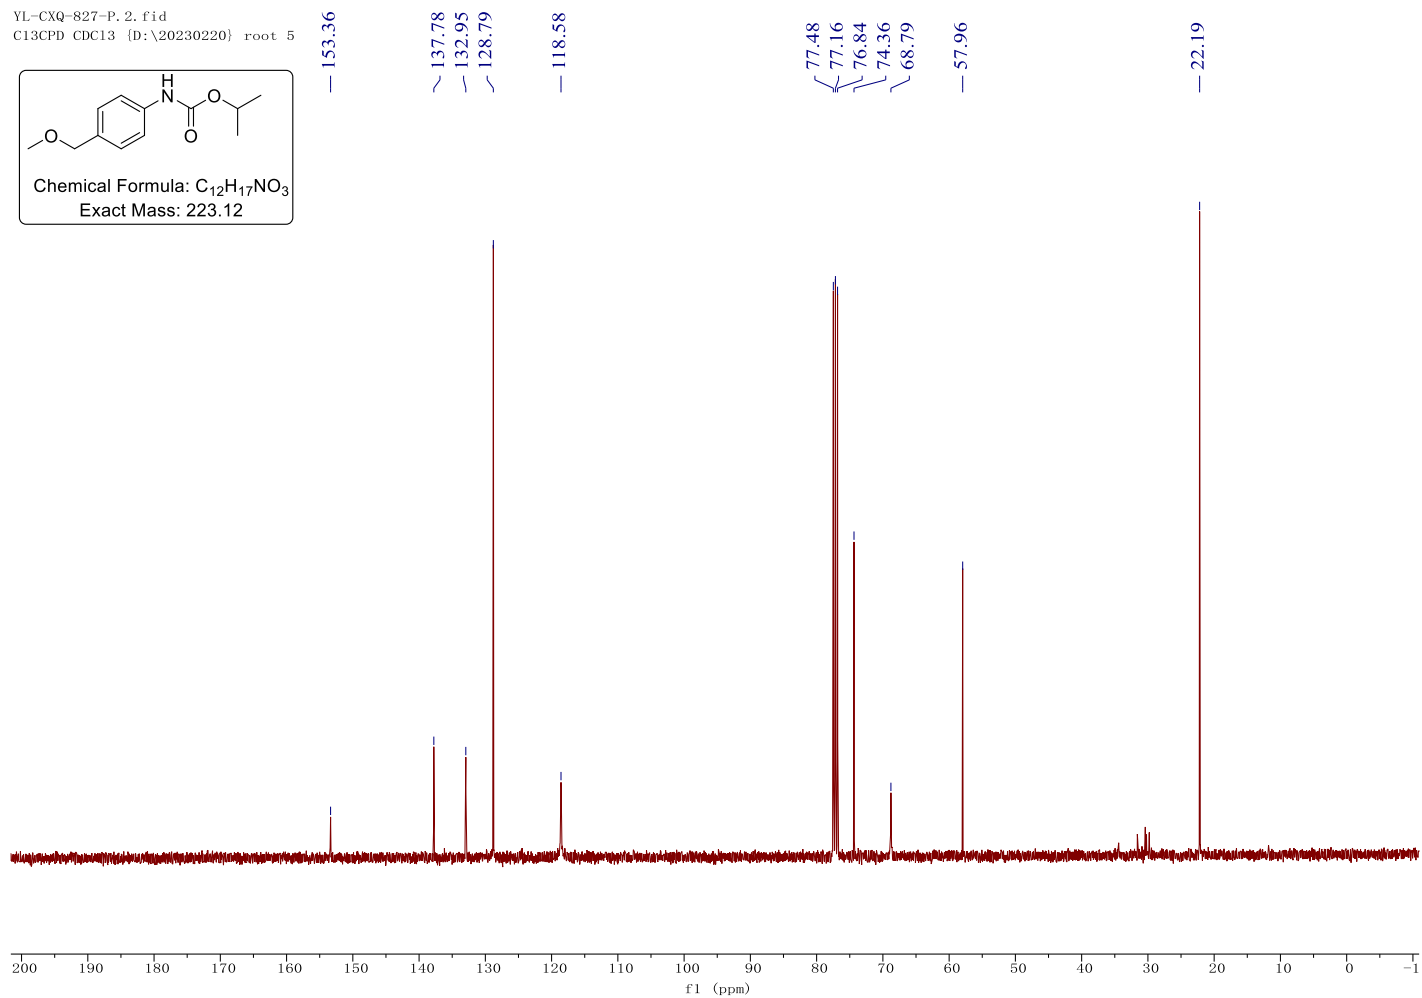



# <sup>1</sup>H NMR (400 MHz, CDCl<sub>3</sub>) spectrum of compound **3ra**.

YL-CXQ-826-P. 1. fid  
PROTON CDC13 {D:\20230220} root 4

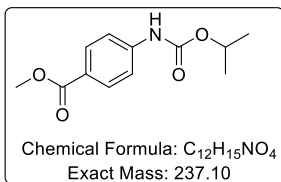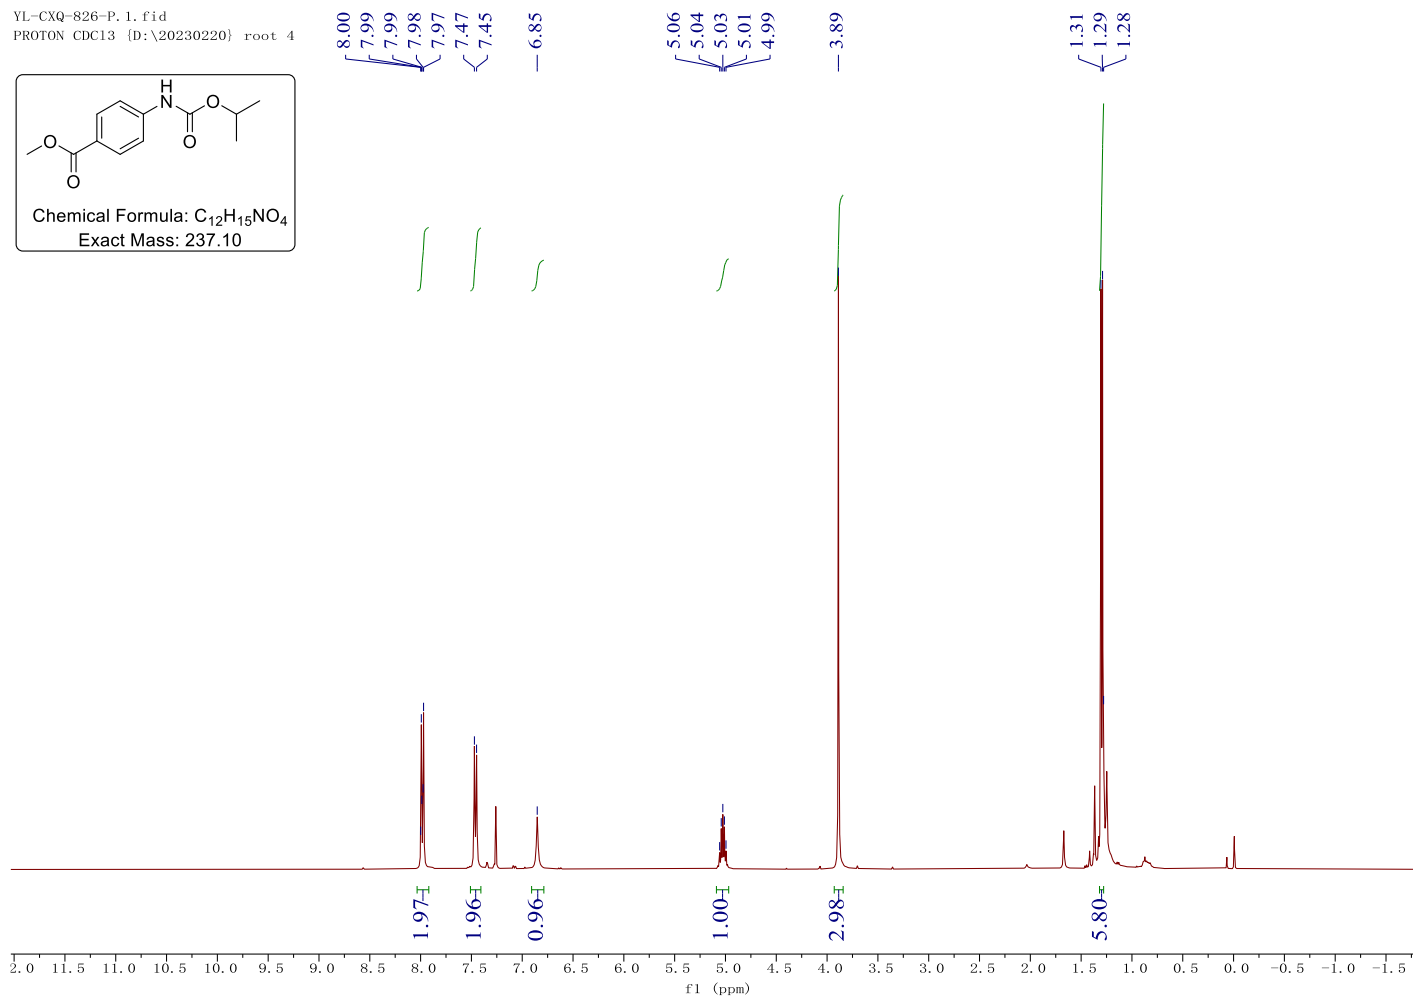

**$^{13}\text{C}\{^1\text{H}\}$  NMR (101 MHz,  $\text{CDCl}_3$ ) spectrum of compound **3ra**.**

YL-CXQ-826-P. 2. fid  
C13CPD CDC13 (D:\20230220)

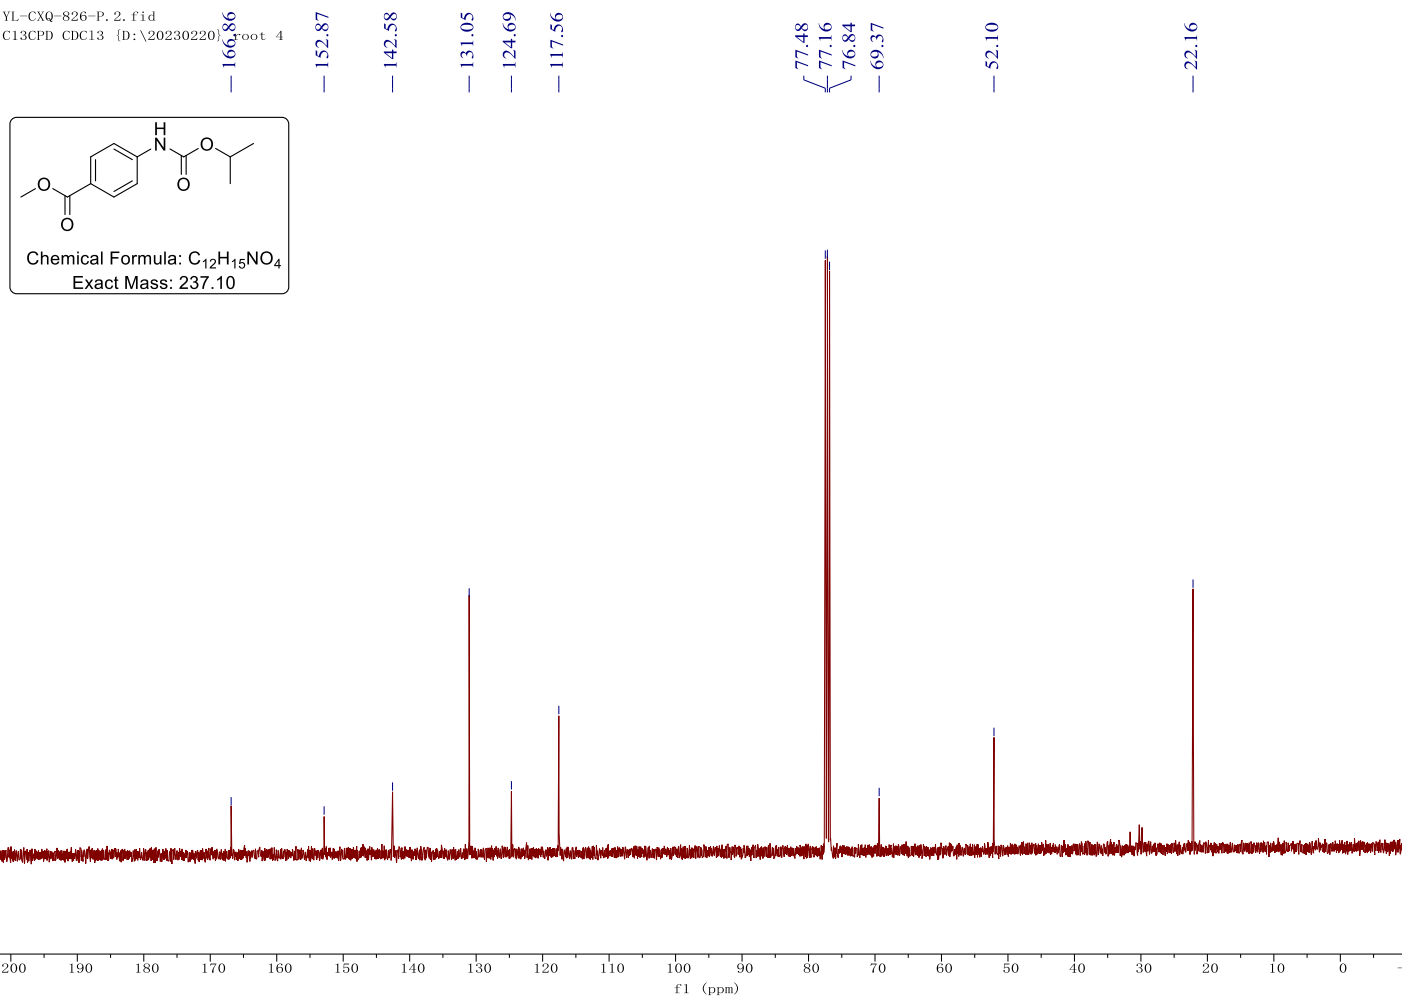

# <sup>1</sup>H NMR (400 MHz, CDCl<sub>3</sub>) spectrum of compound **3sa**.

YL-CXQ-786-P-H.1.fid  
PROTON CDC13 [D:\20221204] root 10

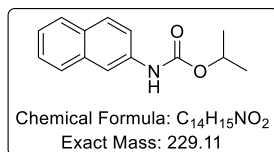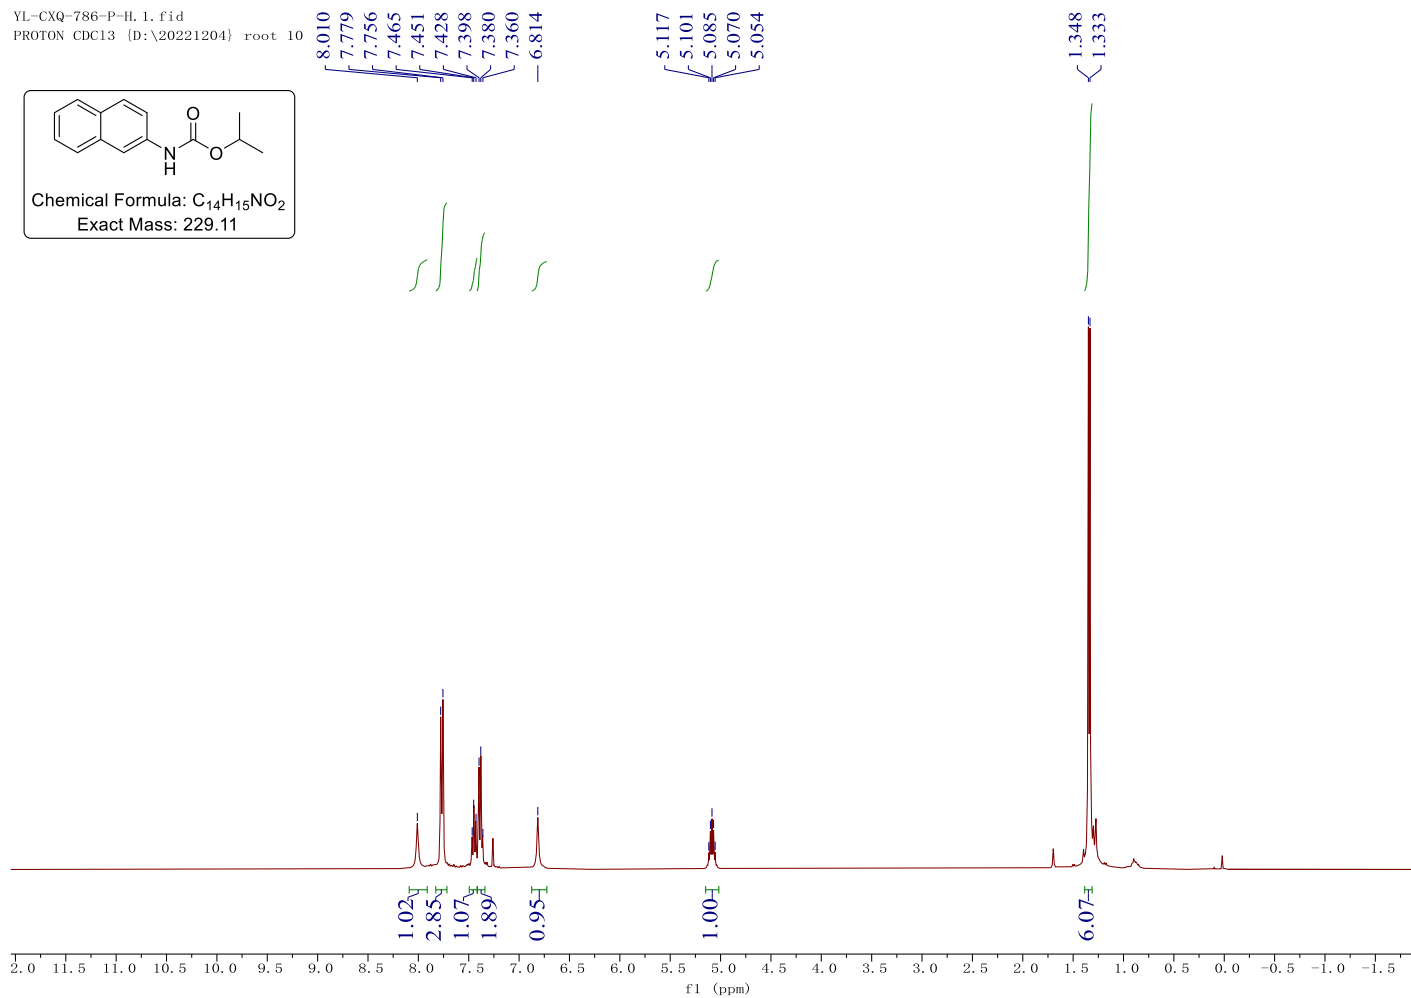

**$^{13}\text{C}\{^1\text{H}\}$  NMR (101 MHz,  $\text{CDCl}_3$ ) spectrum of compound 3sa.**

YL-CXQ-786-P-C. 2. 1. 1r  
C13CPD CDCl3 [D:\20221210] root 54

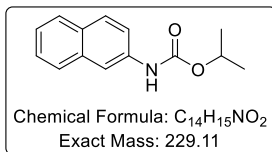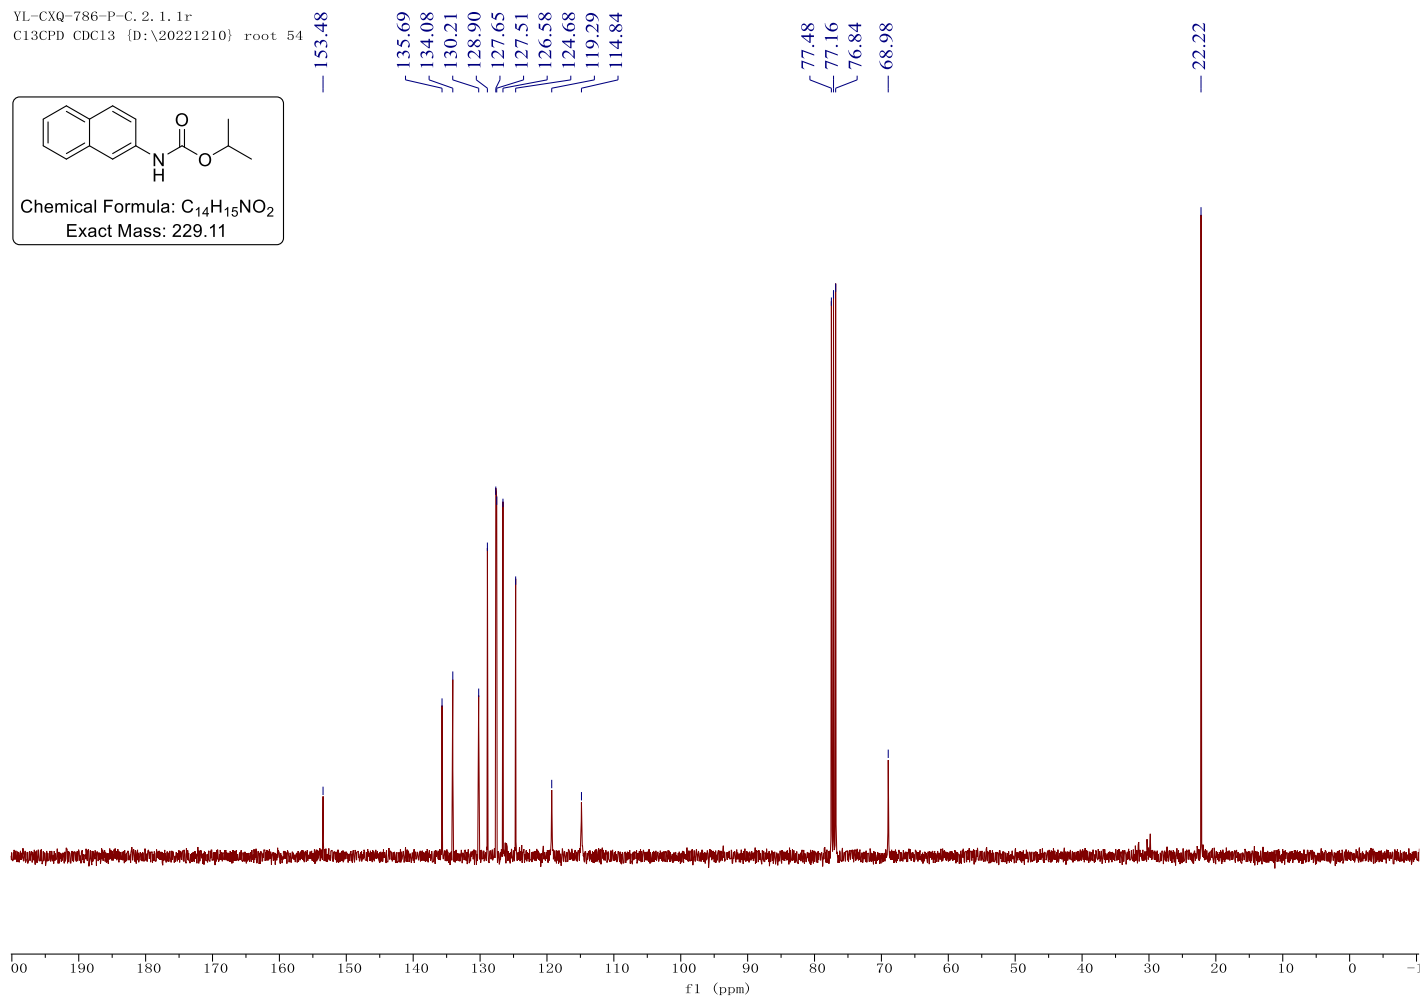

**<sup>1</sup>H NMR (400 MHz, CDCl<sub>3</sub>) spectrum of compound 3ta.**

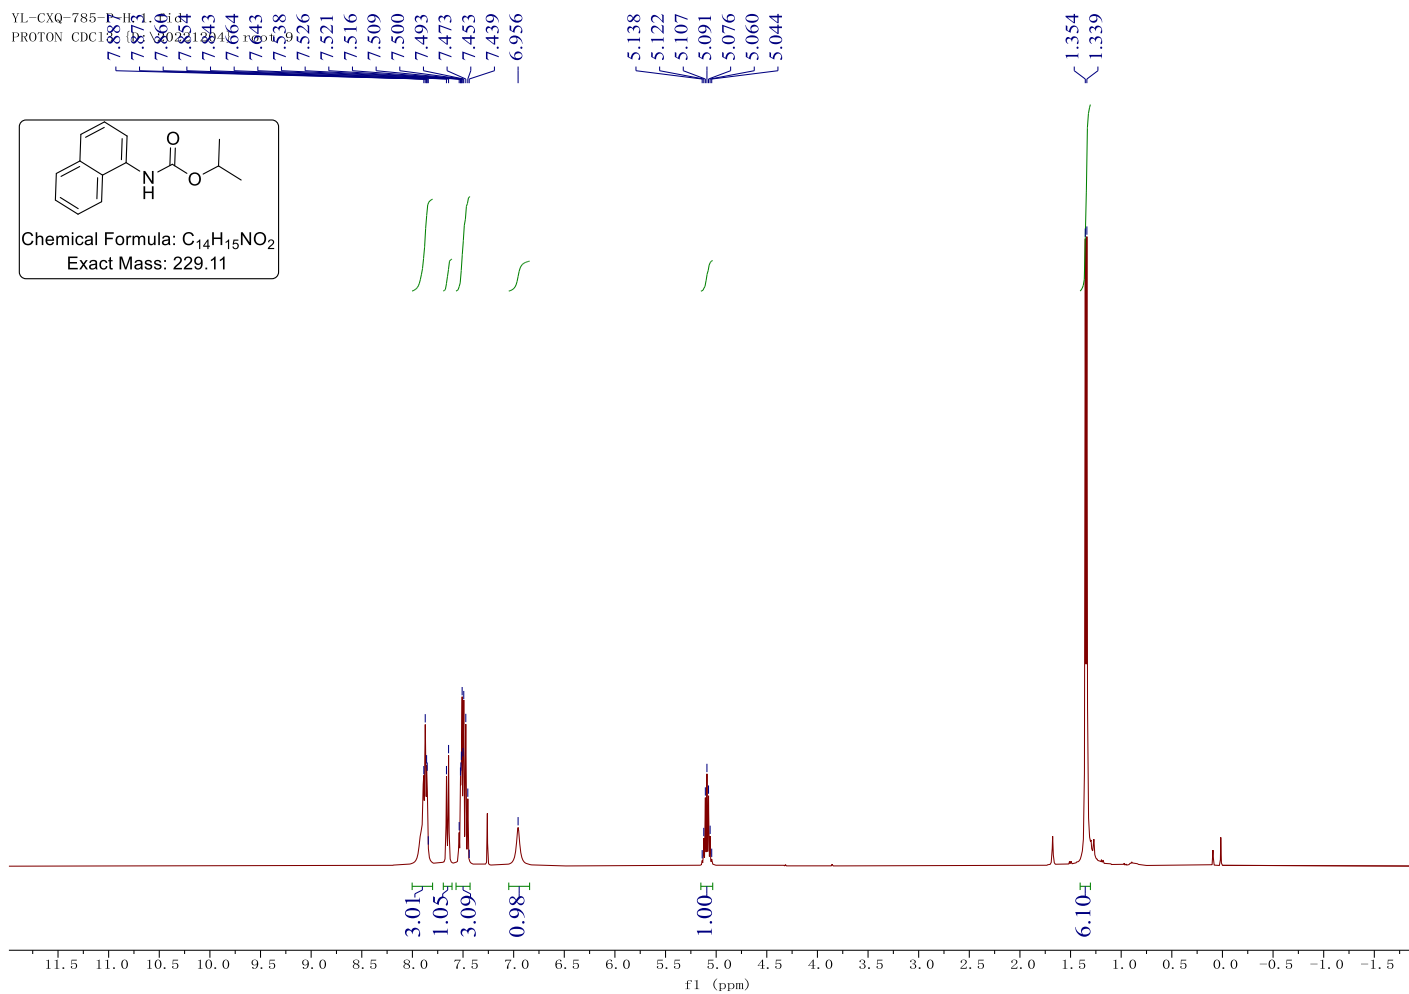

**$^{13}\text{C}\{^1\text{H}\}$  NMR (101 MHz,  $\text{CDCl}_3$ ) spectrum of compound **3ta**.**

YL-CXQ-785.1.fid  
C13CPD CDC13 (D:\20231118) root 13

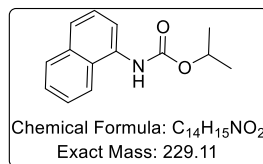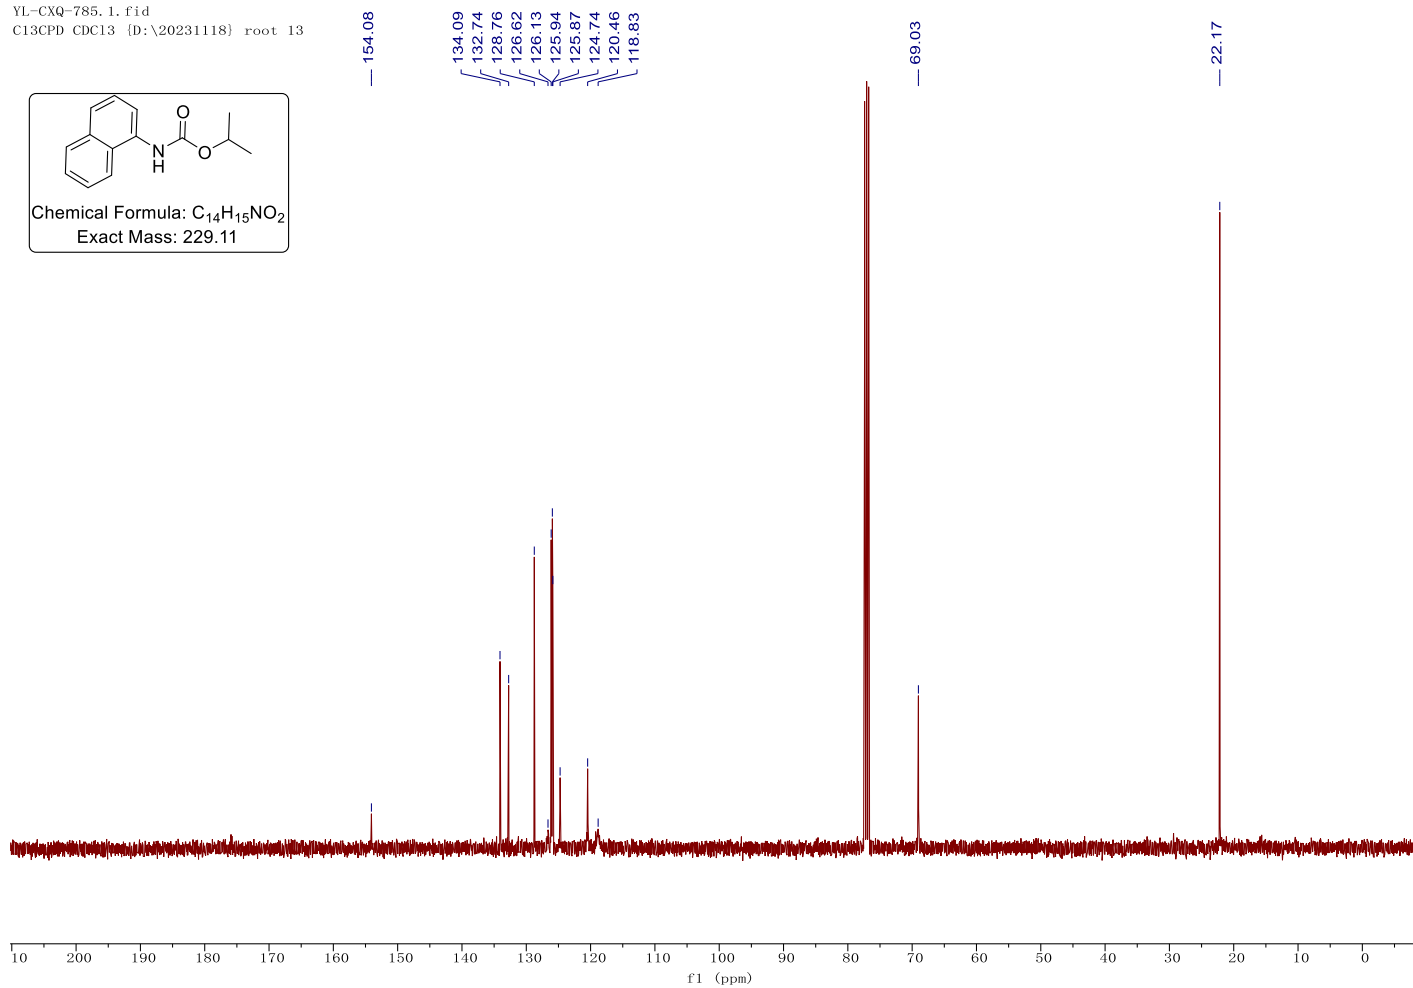

# <sup>1</sup>H NMR (400 MHz, CDCl<sub>3</sub>) spectrum of compound **3ua**.

YL-CXQ-831-P. 1. fid  
PROTON CDCl<sub>3</sub> [D:\20230220] root 7

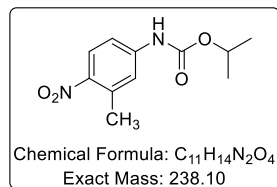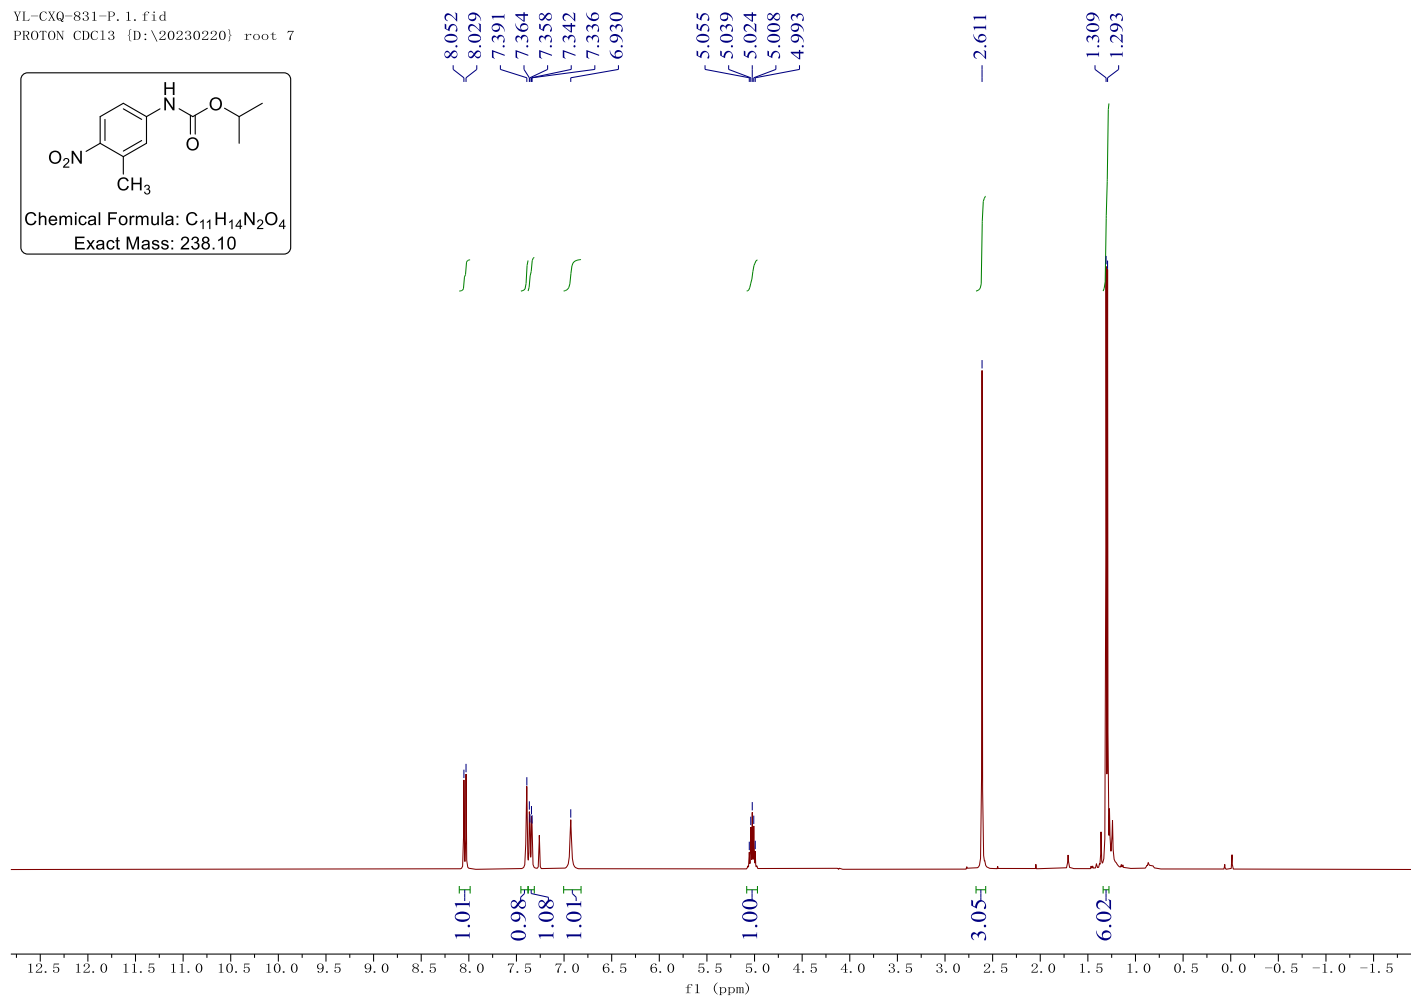

**$^{13}\text{C}\{^1\text{H}\}$  NMR (101 MHz,  $\text{CDCl}_3$ ) spectrum of compound **3ua**.**

YL-CXQ-831-P. 2. fid  
C13CPD CDC13 {D:\20230220} root 7

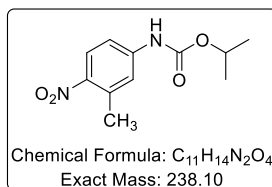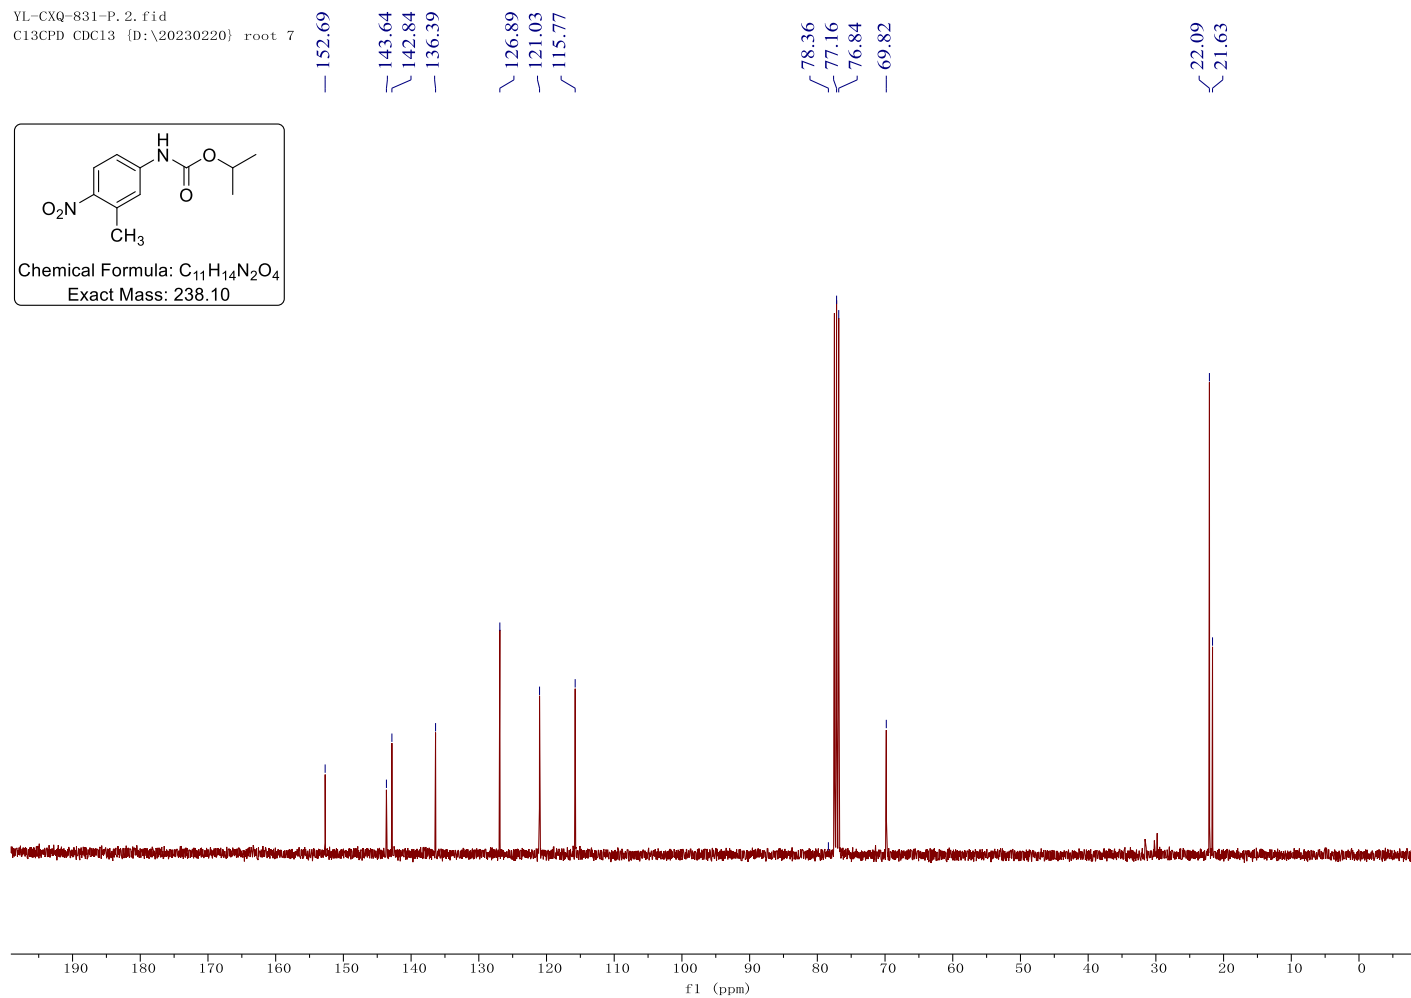



# <sup>1</sup>H NMR (400 MHz, CDCl<sub>3</sub>) spectrum of compound **3va**.

YL-CXQ-834-P. 1. fid  
PROTON CDC13 (D:\20230223) root

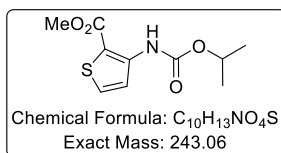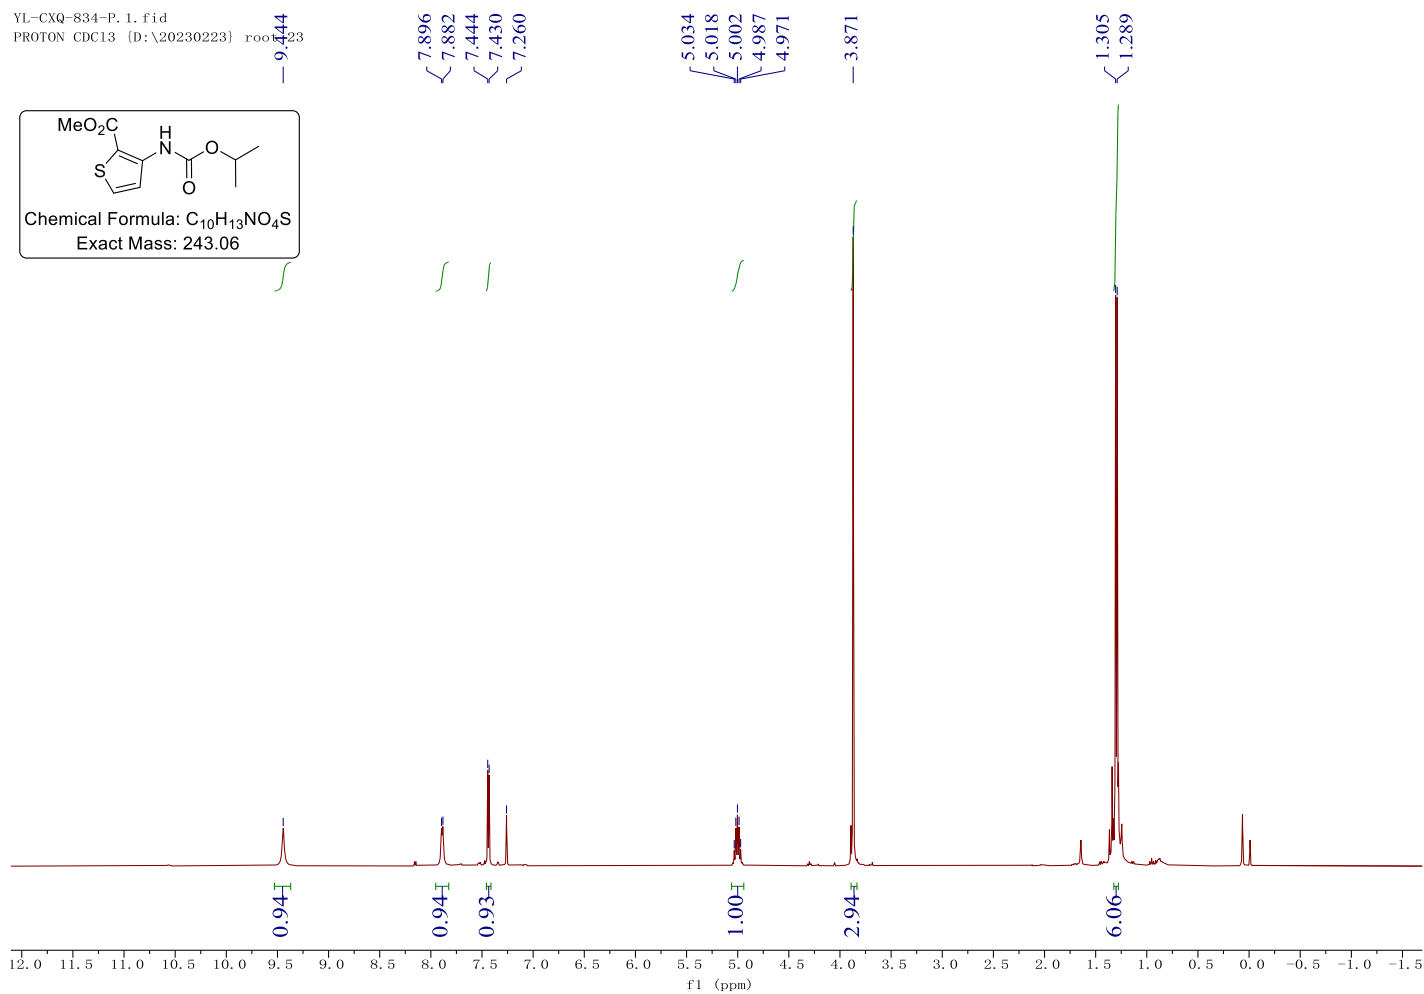

**$^{13}\text{C}\{^1\text{H}\}$  NMR (101 MHz,  $\text{CDCl}_3$ ) spectrum of compound **3va**.**

YL-CXQ-834-P. 2. fid  
C13CPD CDC13 (D:\20230223) root 23

—164.75 —152.80 —145.52 —131.69 —121.39 —108.52 —77.48 —77.16 —76.84 —69.45 —51.97 —22.13

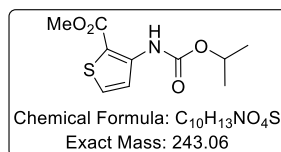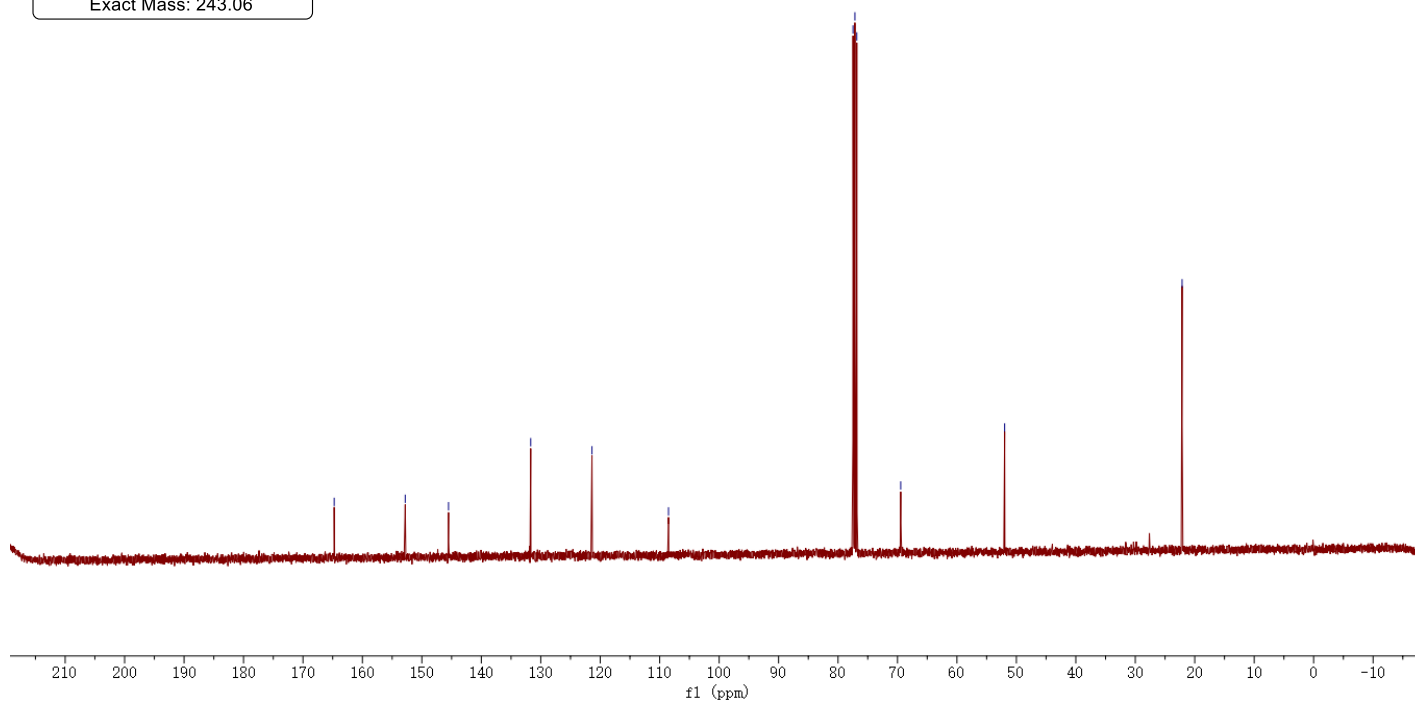

# <sup>1</sup>H NMR (400 MHz, CDCl<sub>3</sub>) spectrum of compound **3wa**.

YL-CXQ-833-P. 1. fid  
PROTON CDCl3 (D:\20230220) root 8

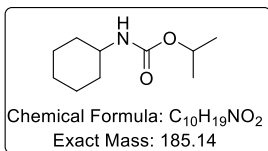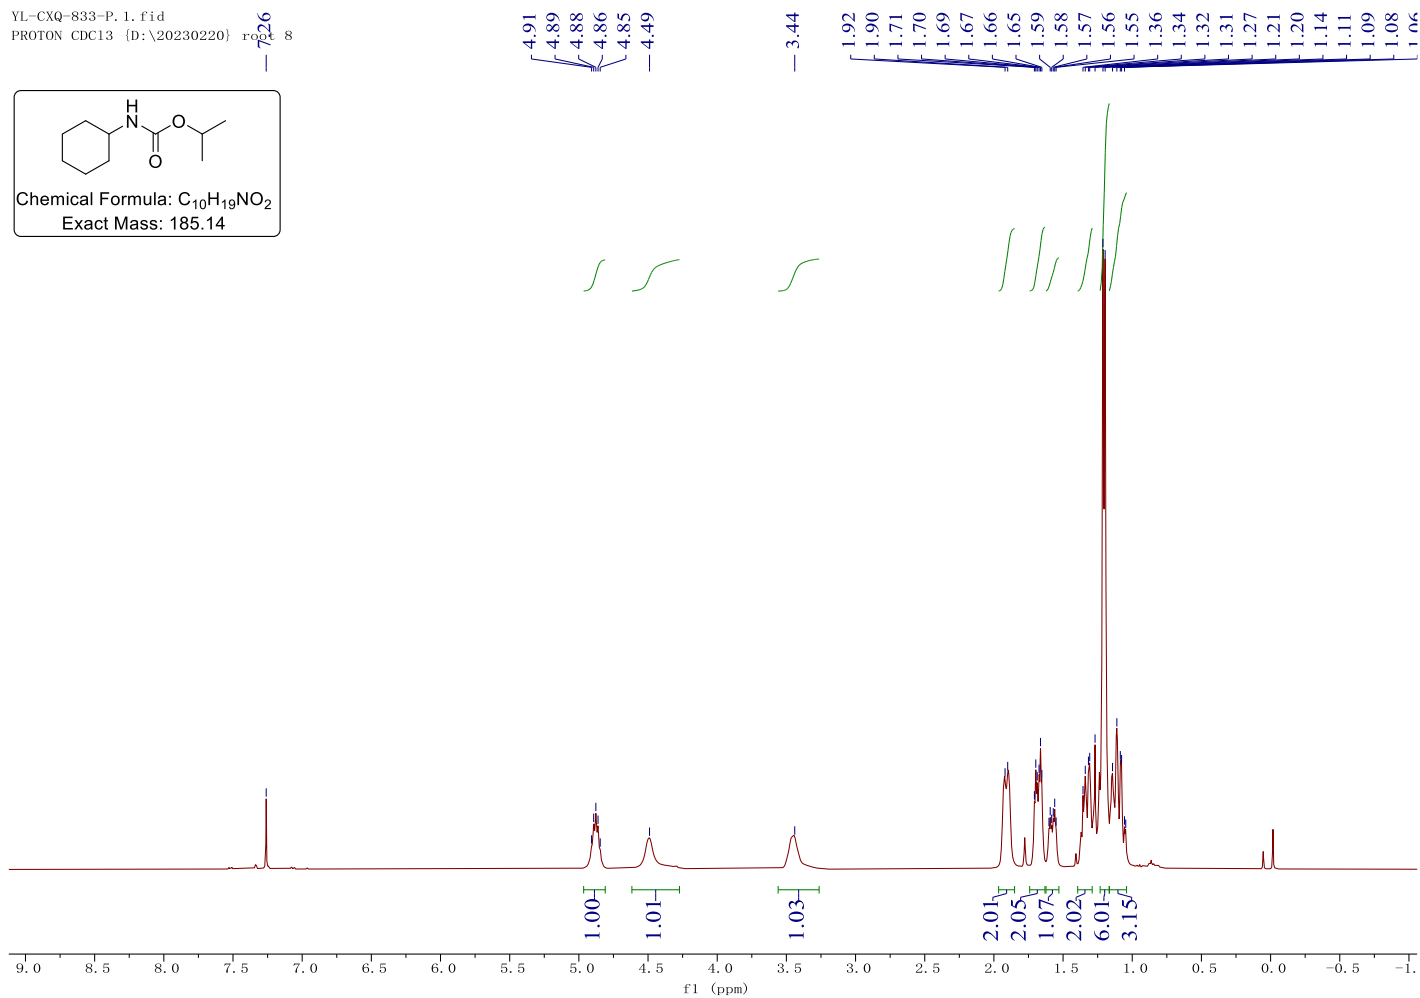

$^{13}\text{C}\{^1\text{H}\}$  NMR (101 MHz,  $\text{CDCl}_3$ ) spectrum of compound **3wa**.

YL-CXQ-833-P. 2. fid  
C13CPD CDCl3 (D:\20230220) root 8

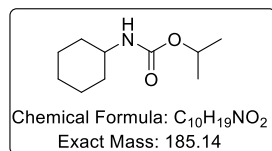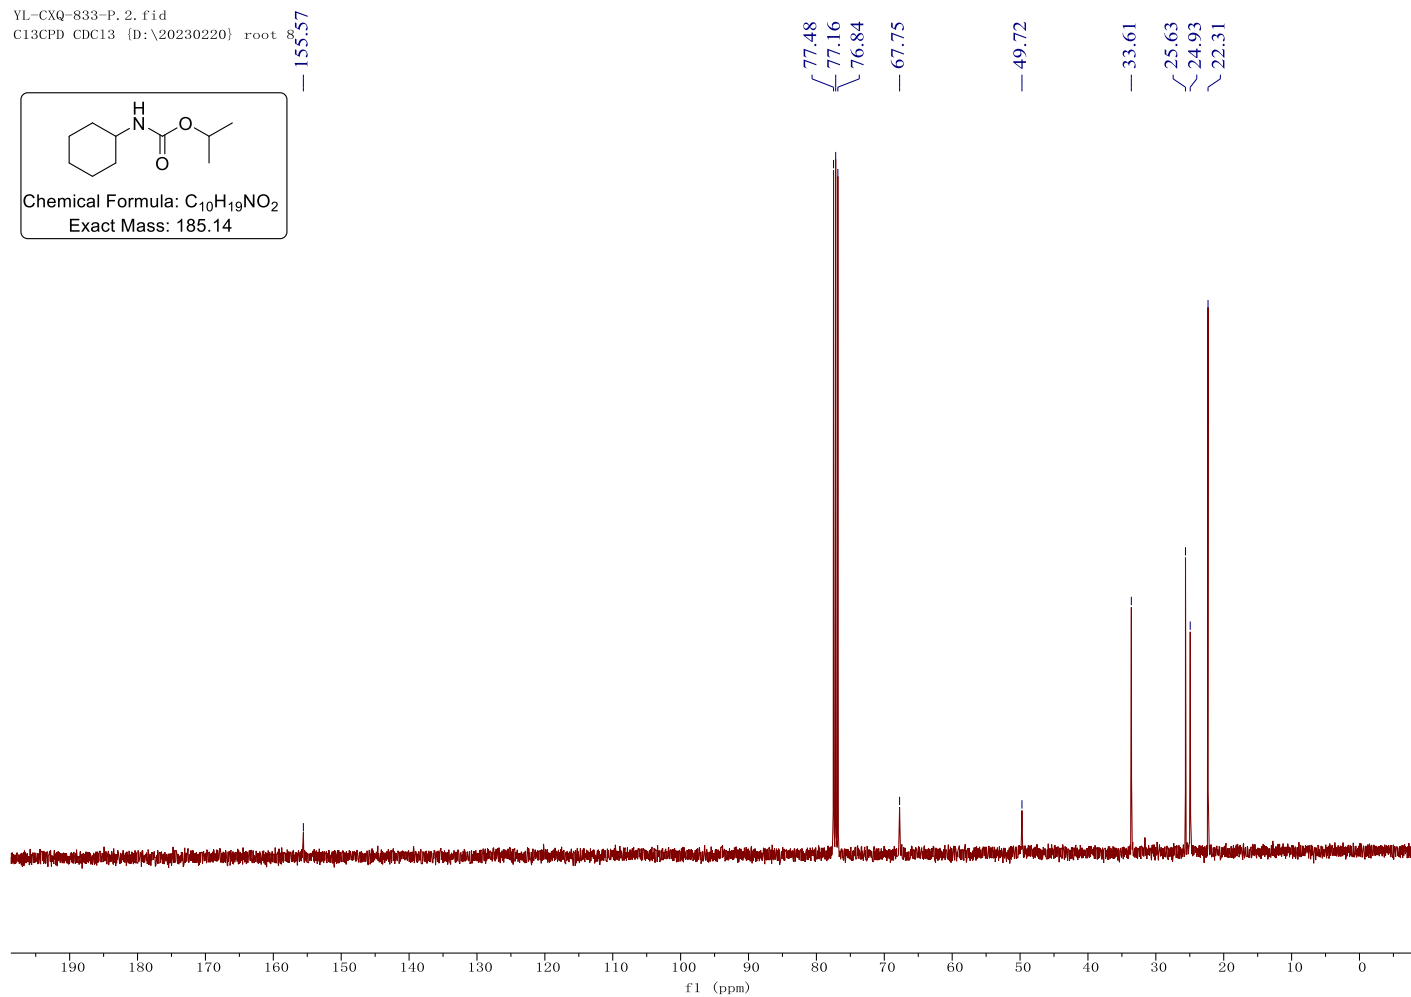

# <sup>1</sup>H NMR (400 MHz, CDCl<sub>3</sub>) spectrum of compound **3xa**.

YL-CXQ-832-P. 1. fid  
PROTON CDCl3 (D:\20230309) root 16

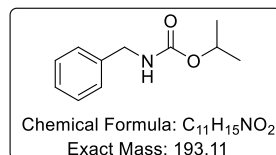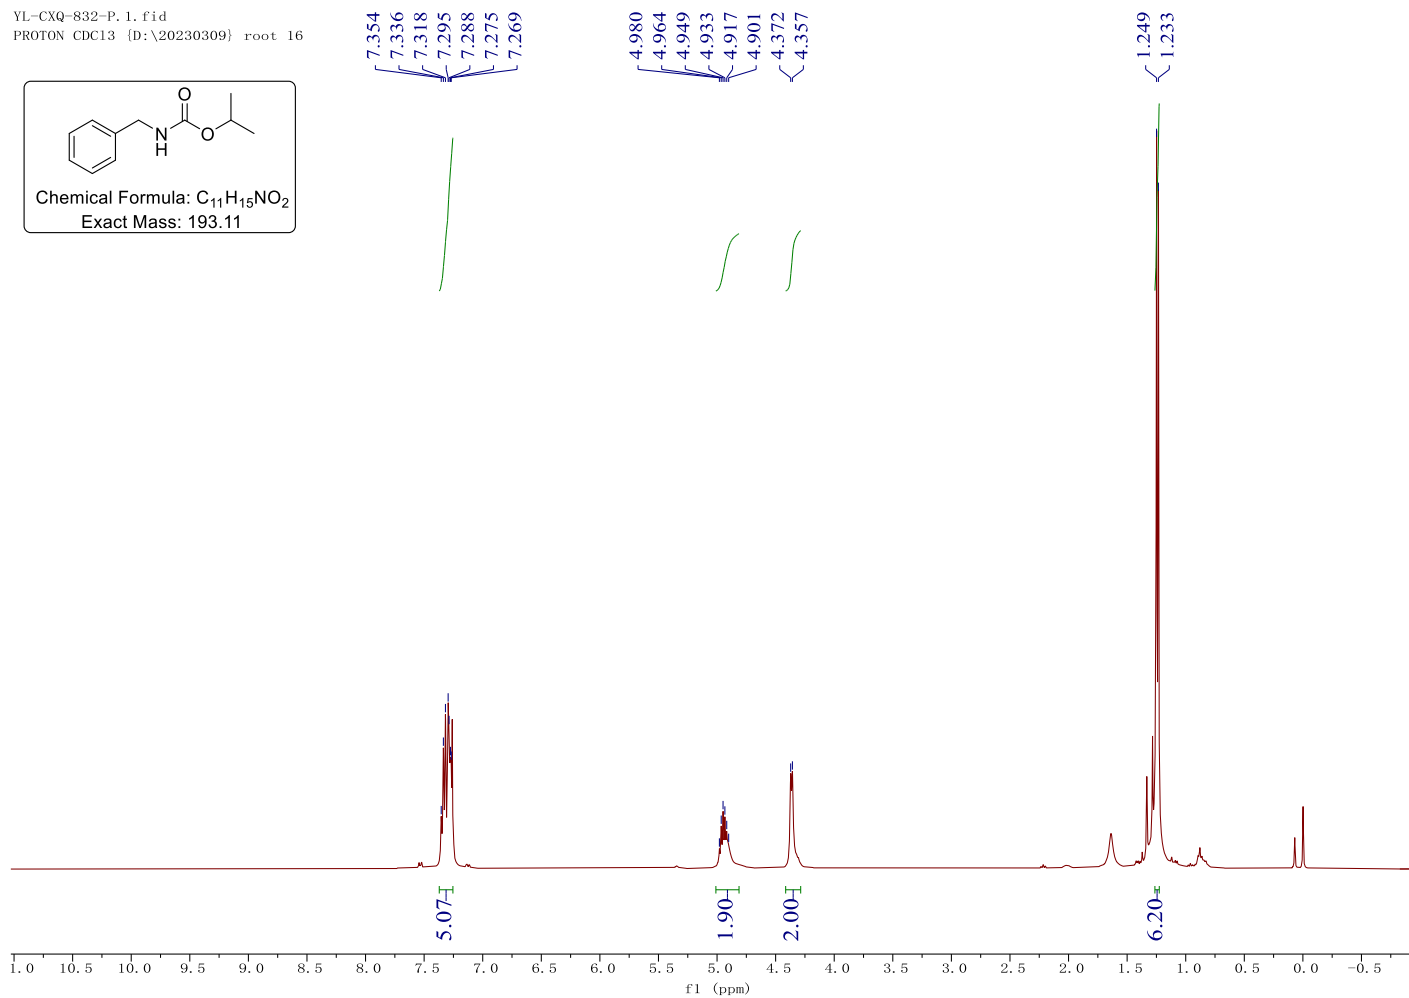

$^{13}\text{C}\{^1\text{H}\}$  NMR (101 MHz,  $\text{CDCl}_3$ ) spectrum of compound **3xa**.

YL-CXQ-832.1.fid  
C13CPD CDC13 (D:\20231129) root 60

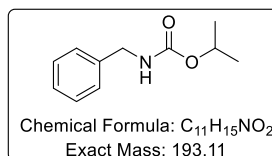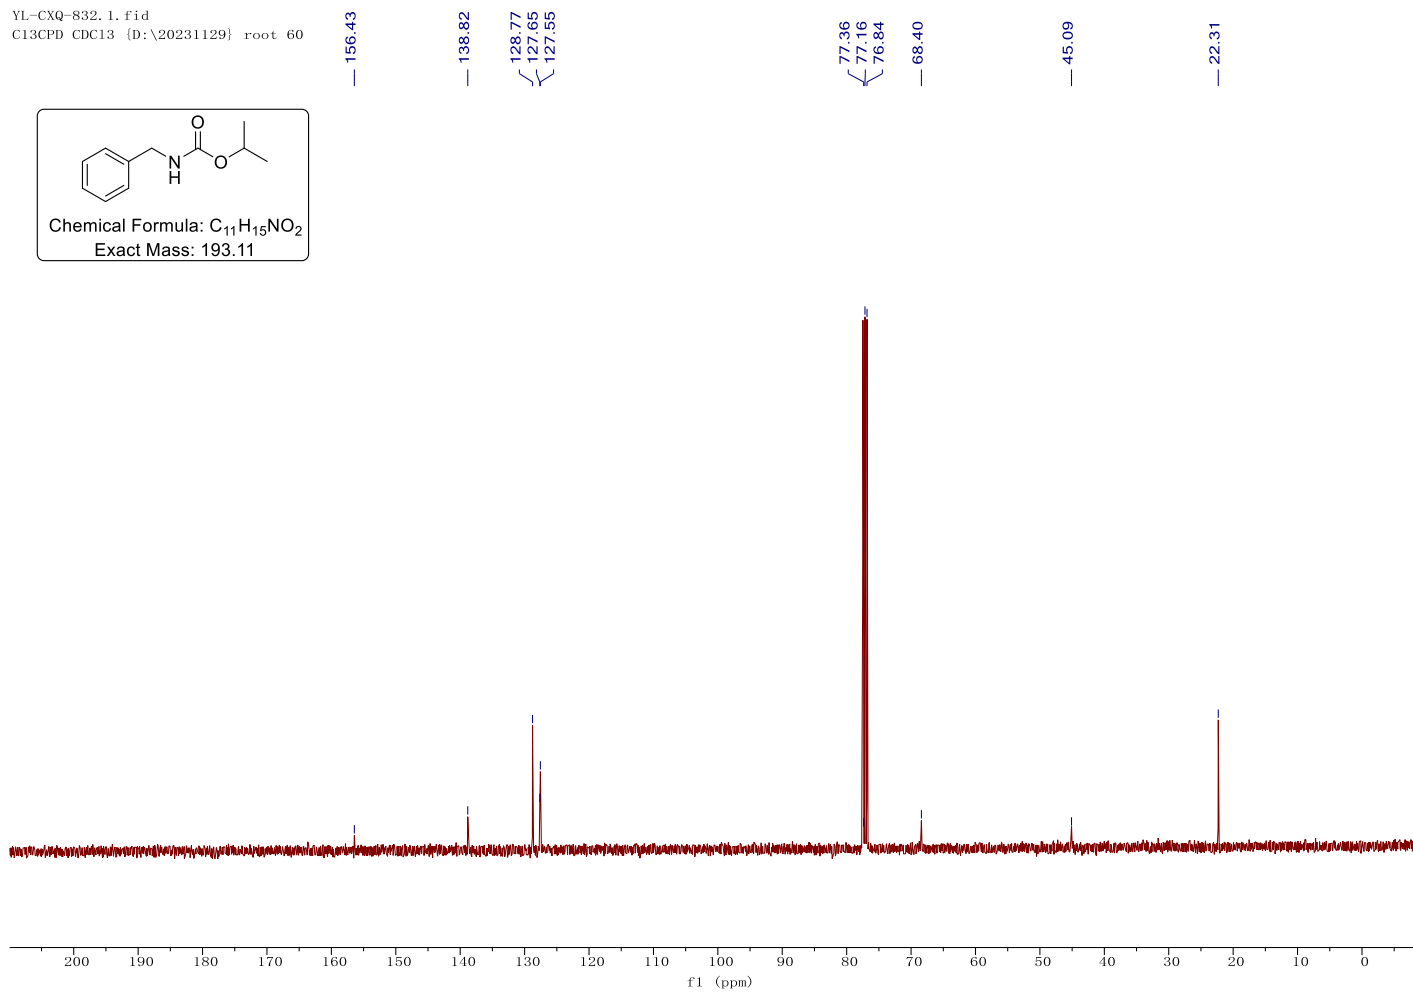

# <sup>1</sup>H NMR (400 MHz, CDCl<sub>3</sub>) spectrum of compound **3ab**.

YL-CXQ-813-P-H.1.fid  
PROTON CDCl<sub>3</sub> (D:\20221215) root 23

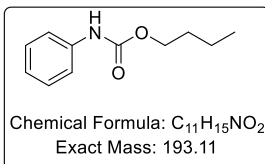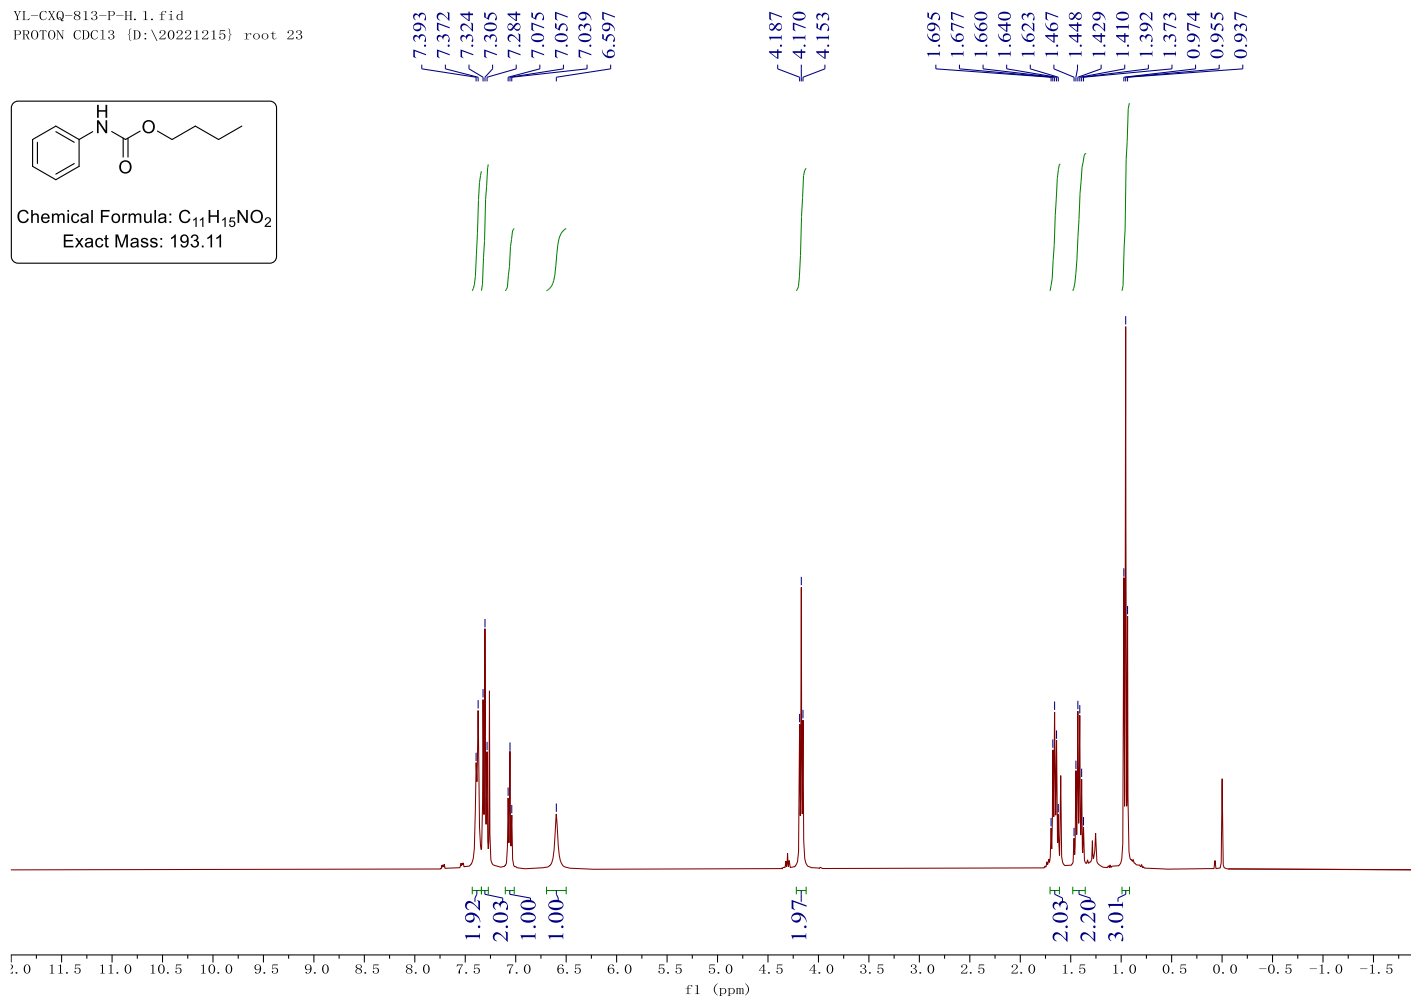

**$^{13}\text{C}\{^1\text{H}\}$  NMR (101 MHz,  $\text{CDCl}_3$ ) spectrum of compound **3ab**.**

YL-CXQ-813-P-C. 1. fid  
C13CPD CDC13 (D:\20230213) root 8

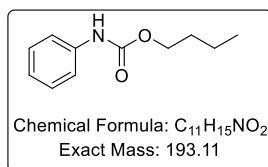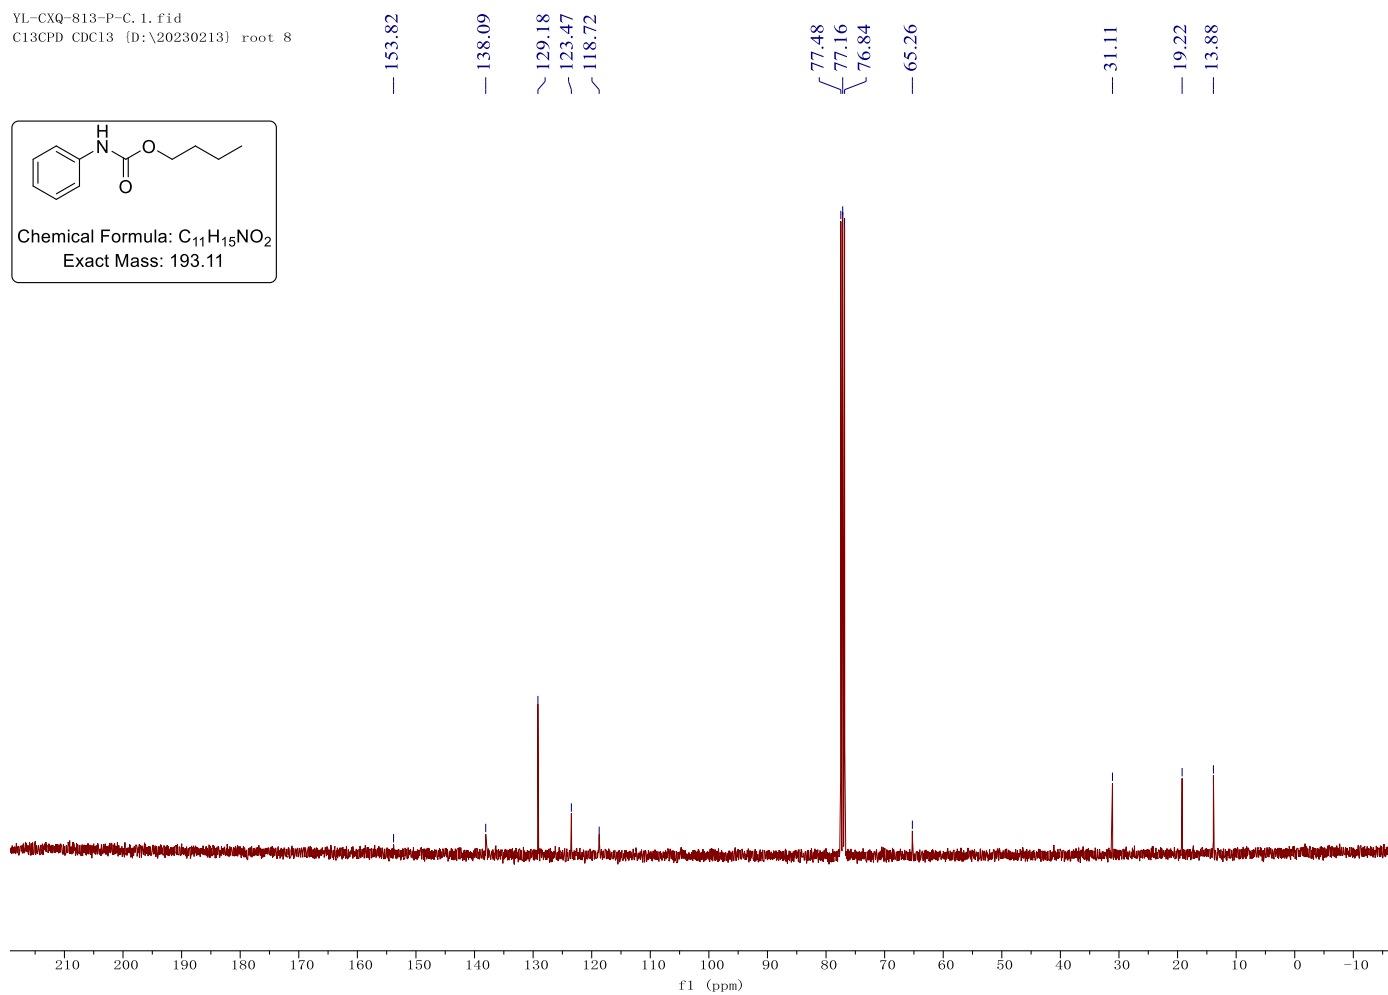



# <sup>1</sup>H NMR (400 MHz, CDCl<sub>3</sub>) spectrum of compound **3ac**.

YL-CXQ-798-P-H.1.fid  
PROTON CDCl3 [D:\20221215] root 22

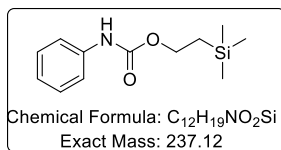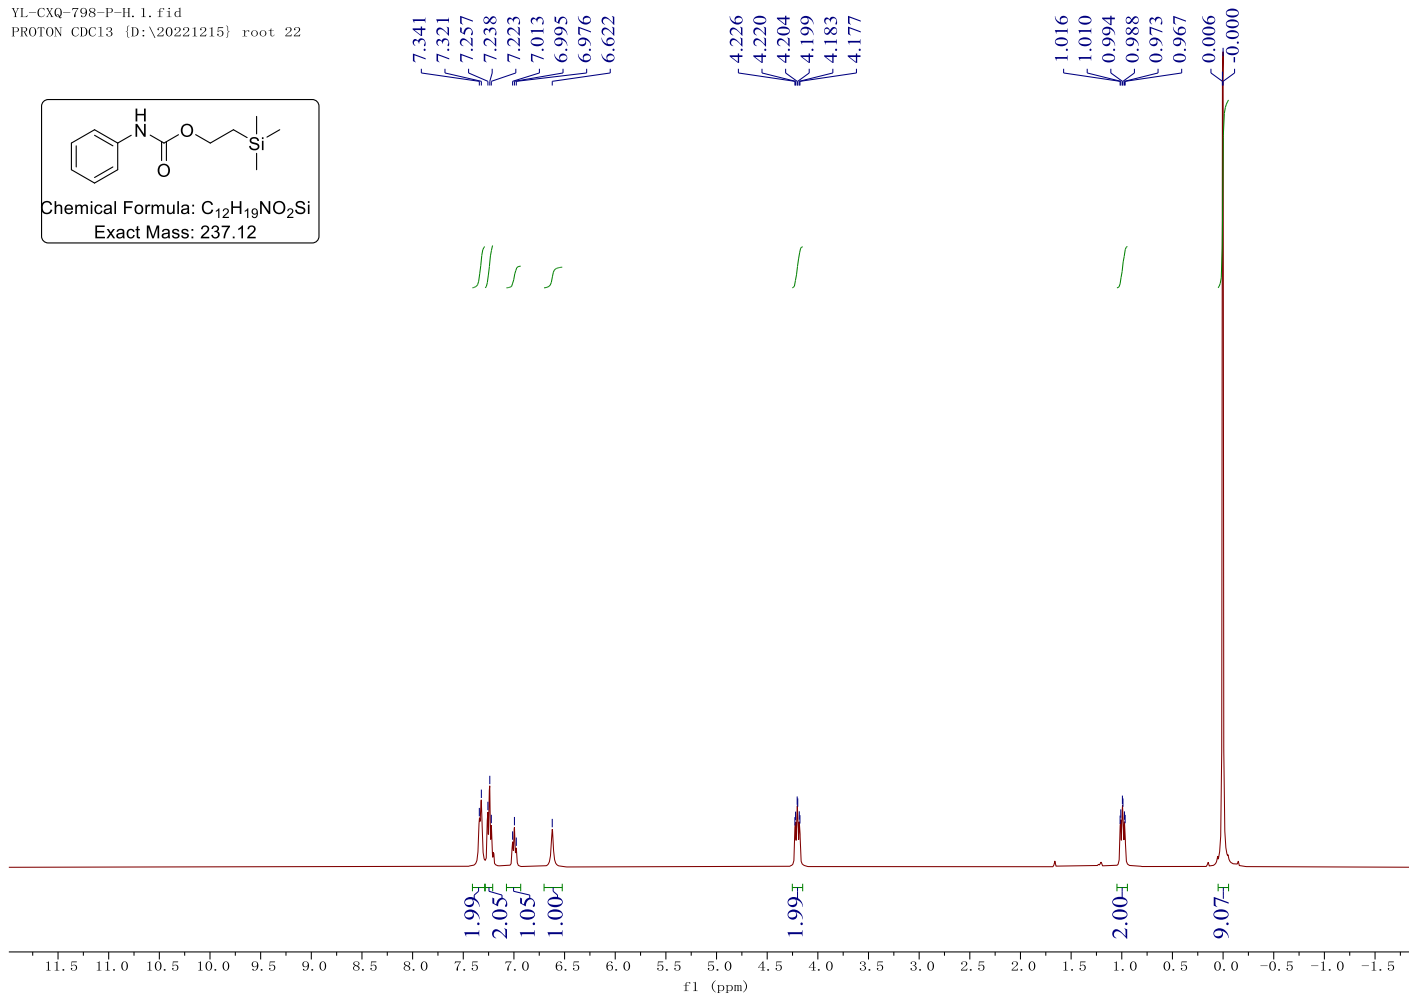

**$^{13}\text{C}\{^1\text{H}\}$  NMR (101 MHz,  $\text{CDCl}_3$ ) spectrum of compound **3ac**.**

YL-CXQ-798-P-C.1.fid  
C13CPD CDCl3 [D:\20230213] root 3

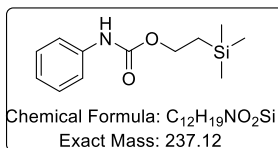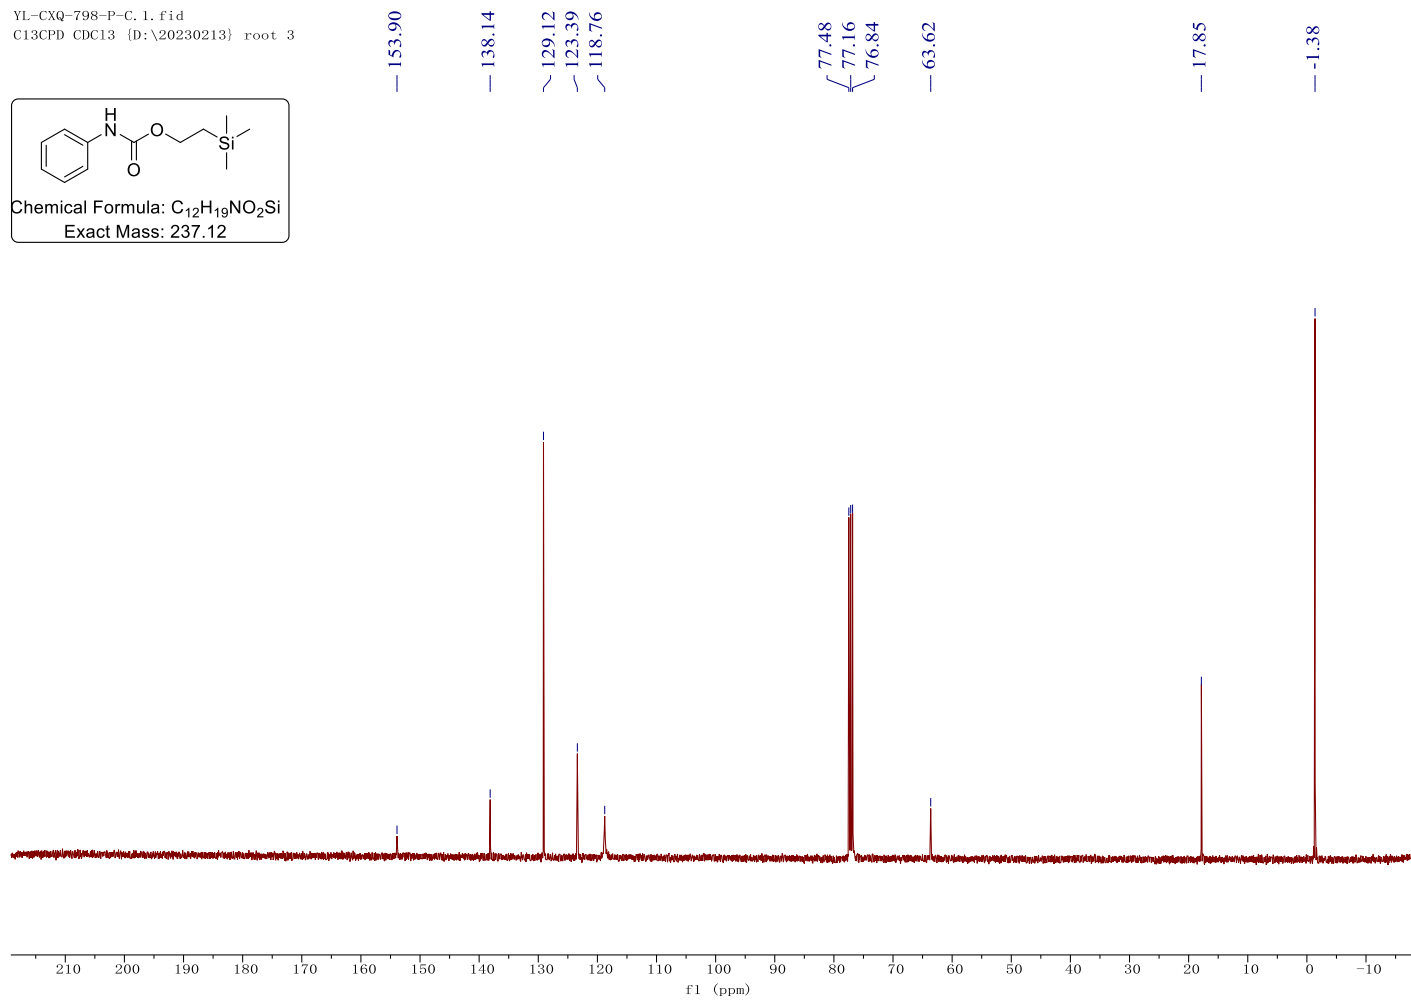

# <sup>1</sup>H NMR (400 MHz, CDCl<sub>3</sub>) spectrum of compound **3ad**.

YL-CXQ-797-P-H.L.fid  
PROTON CDCl3 (D:\20221215)

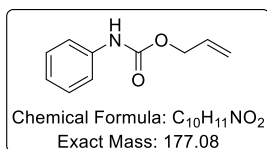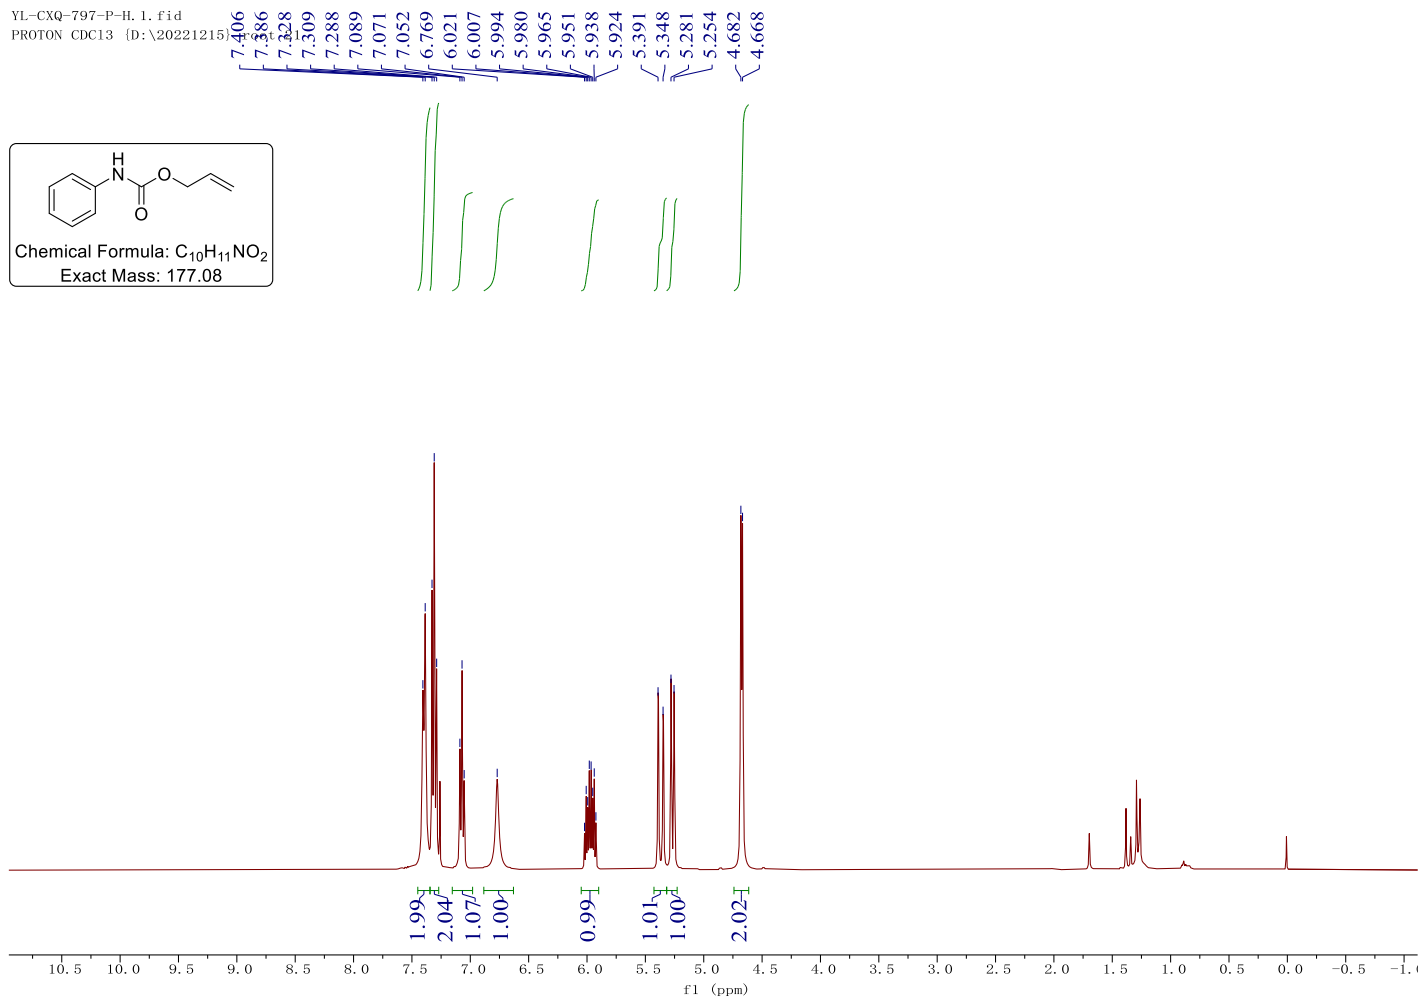

$^{13}\text{C}\{^1\text{H}\}$  NMR (101 MHz,  $\text{CDCl}_3$ ) spectrum of compound **3ad**.

YL-CXQ-797-P-C.2.fid  
C13CPD CDCl3 {D:\20230213} root 2

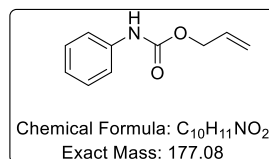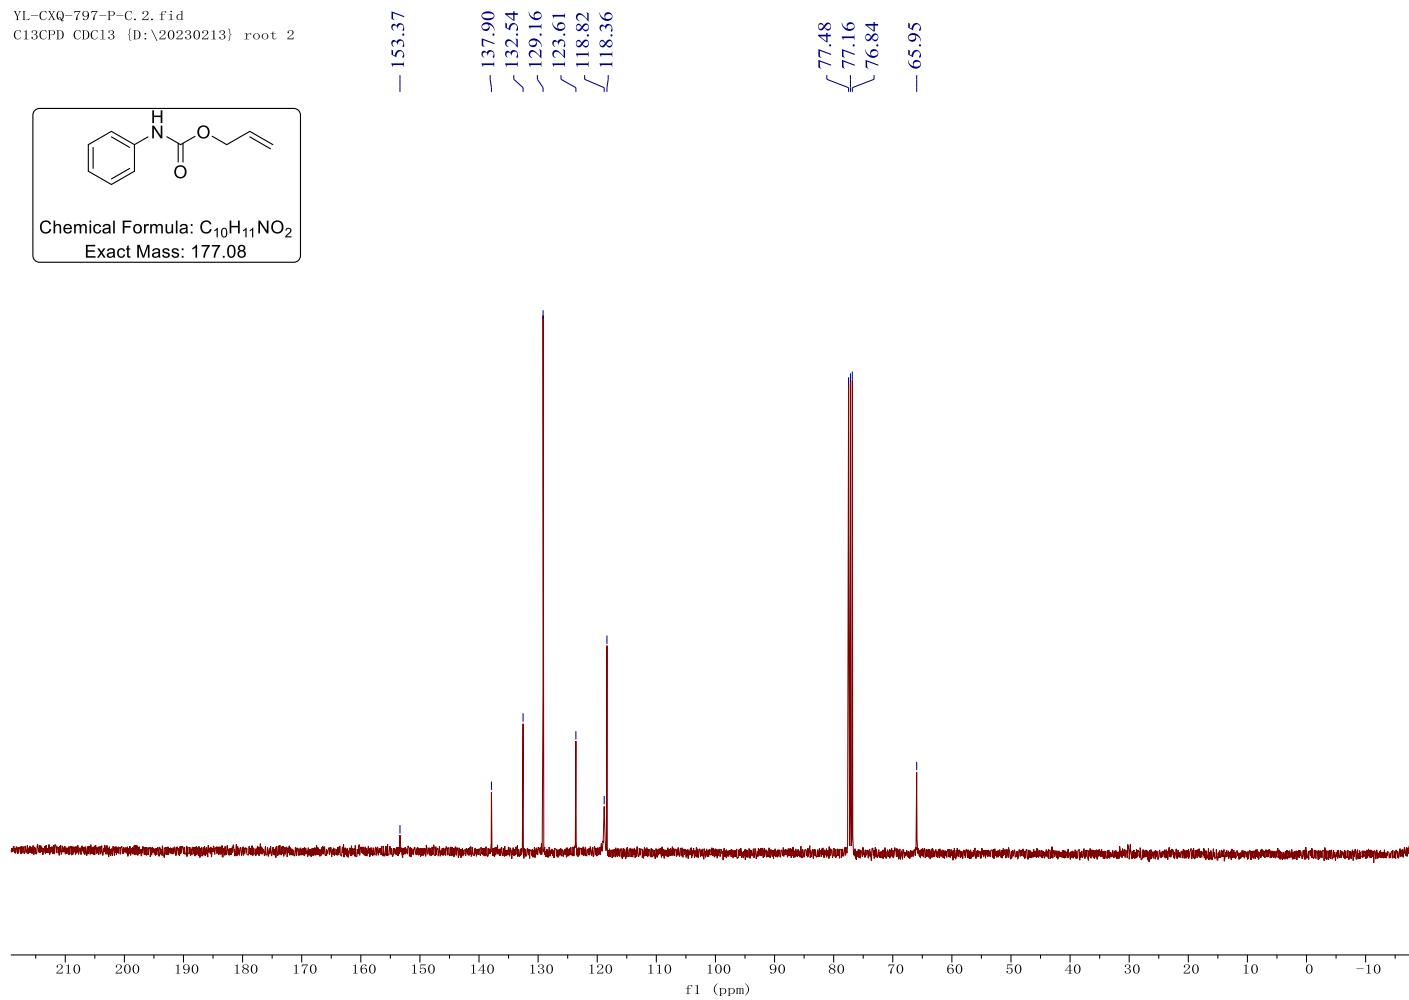

<sup>1</sup>H NMR (400 MHz, CDCl<sub>3</sub>) spectrum of compound **3ae**.

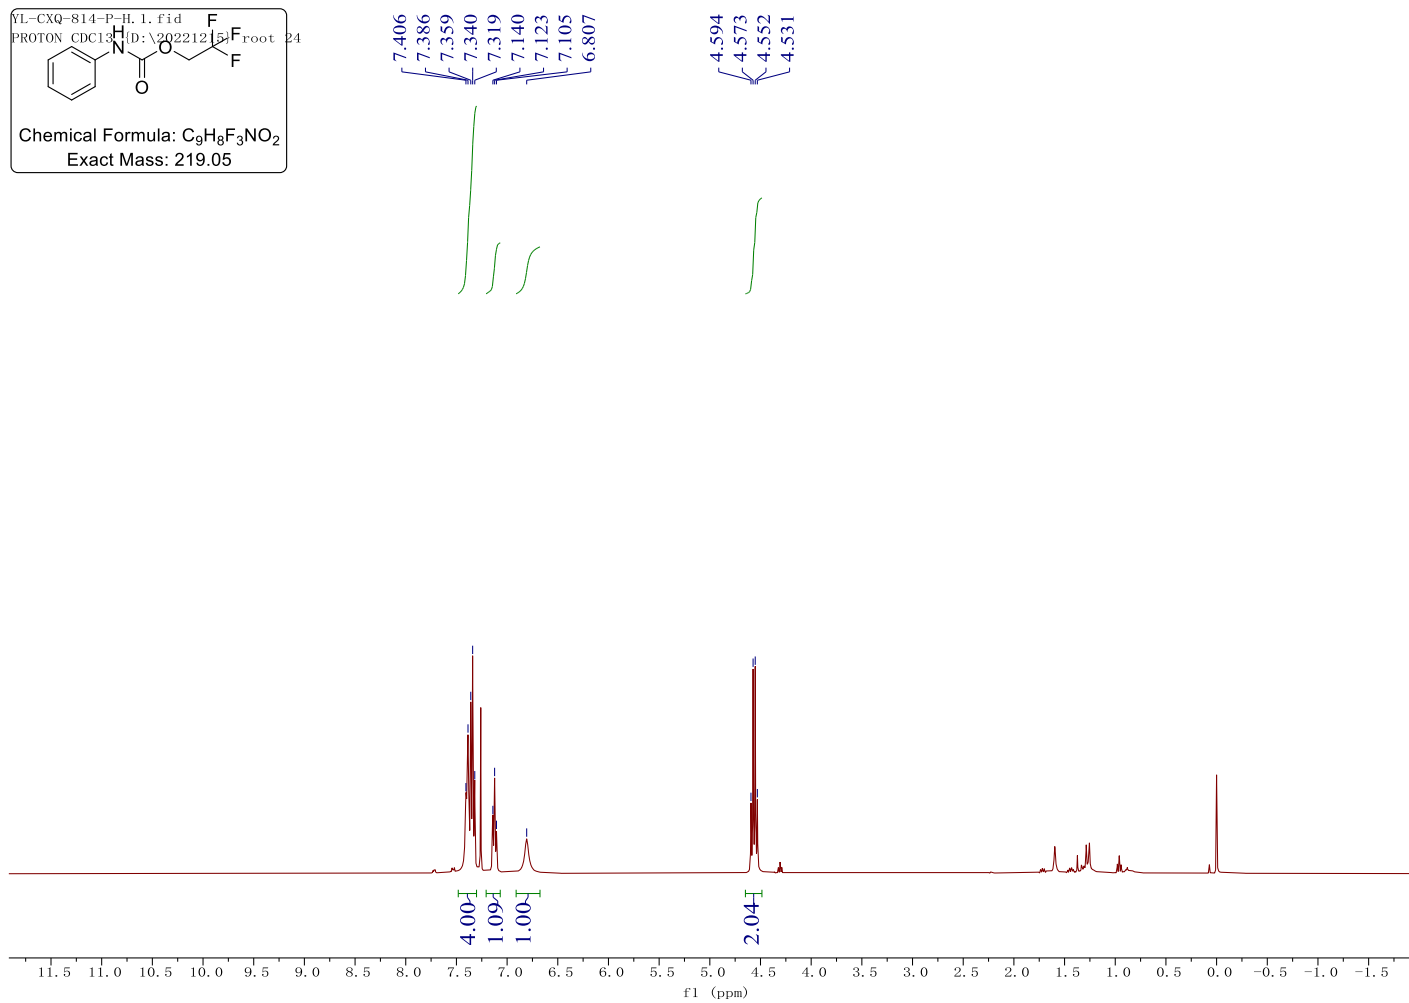

$^{13}\text{C}\{^1\text{H}\}$  NMR (101 MHz,  $\text{CDCl}_3$ ) spectrum of compound **3ae**.

YL-CXQ-744-P-C.1.fid  
C13CPD CDCl3 [D:\20230213] root 1

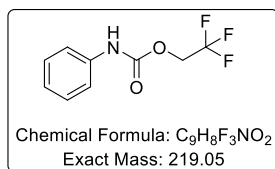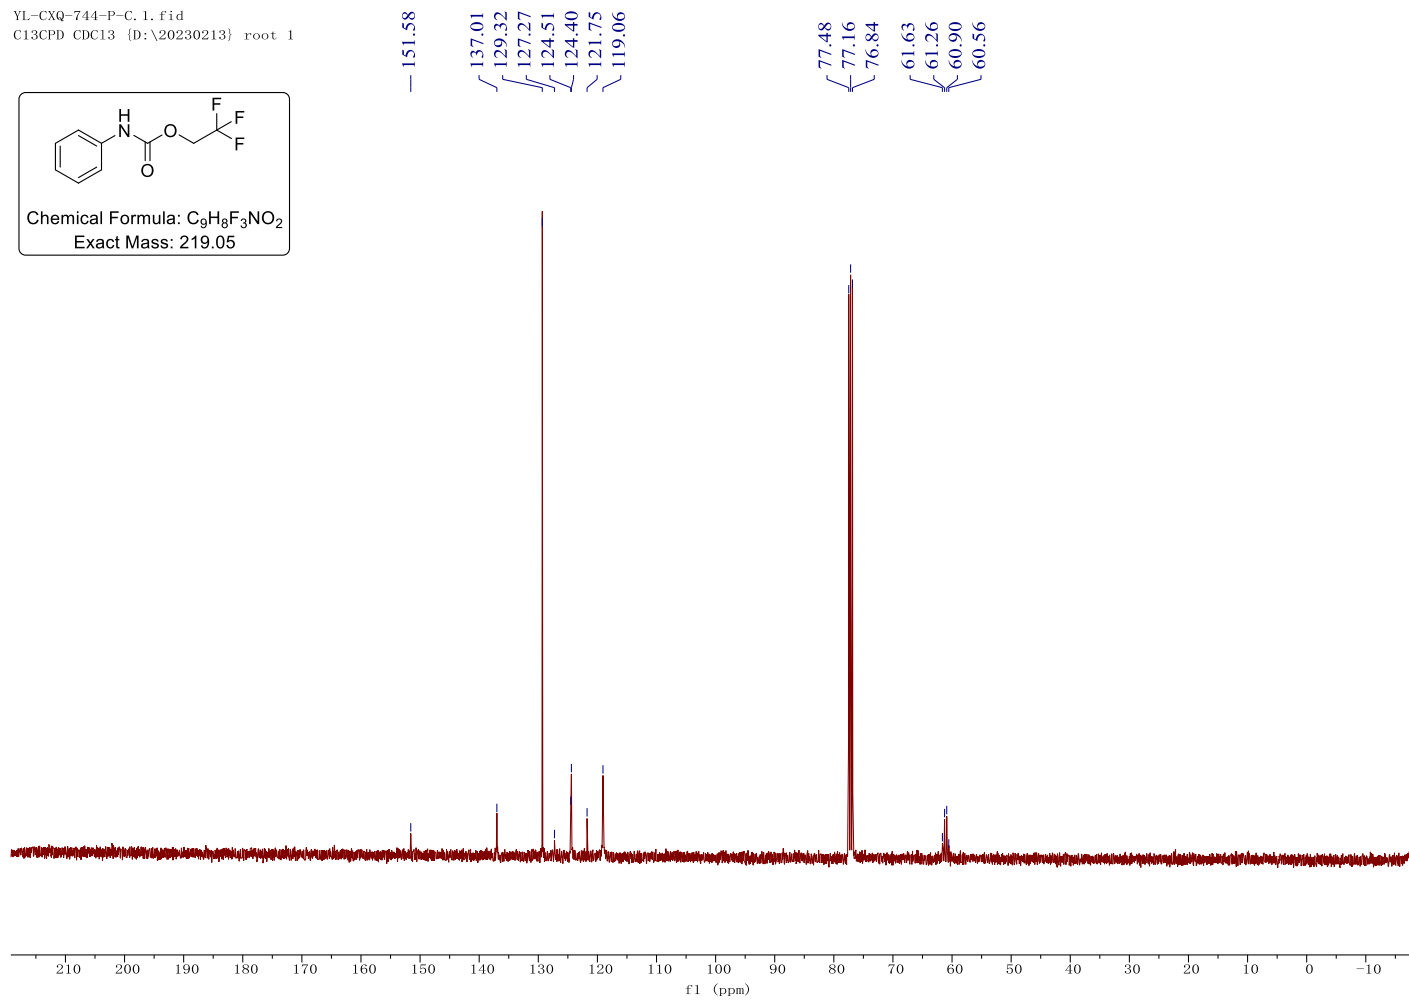

# <sup>1</sup>H NMR (400 MHz, CDCl<sub>3</sub>) spectrum of compound **3af**.

YL-ZXY-48.1.fid  
PROTON CDCl<sub>3</sub> (D:\20231105) root 6

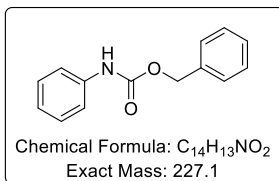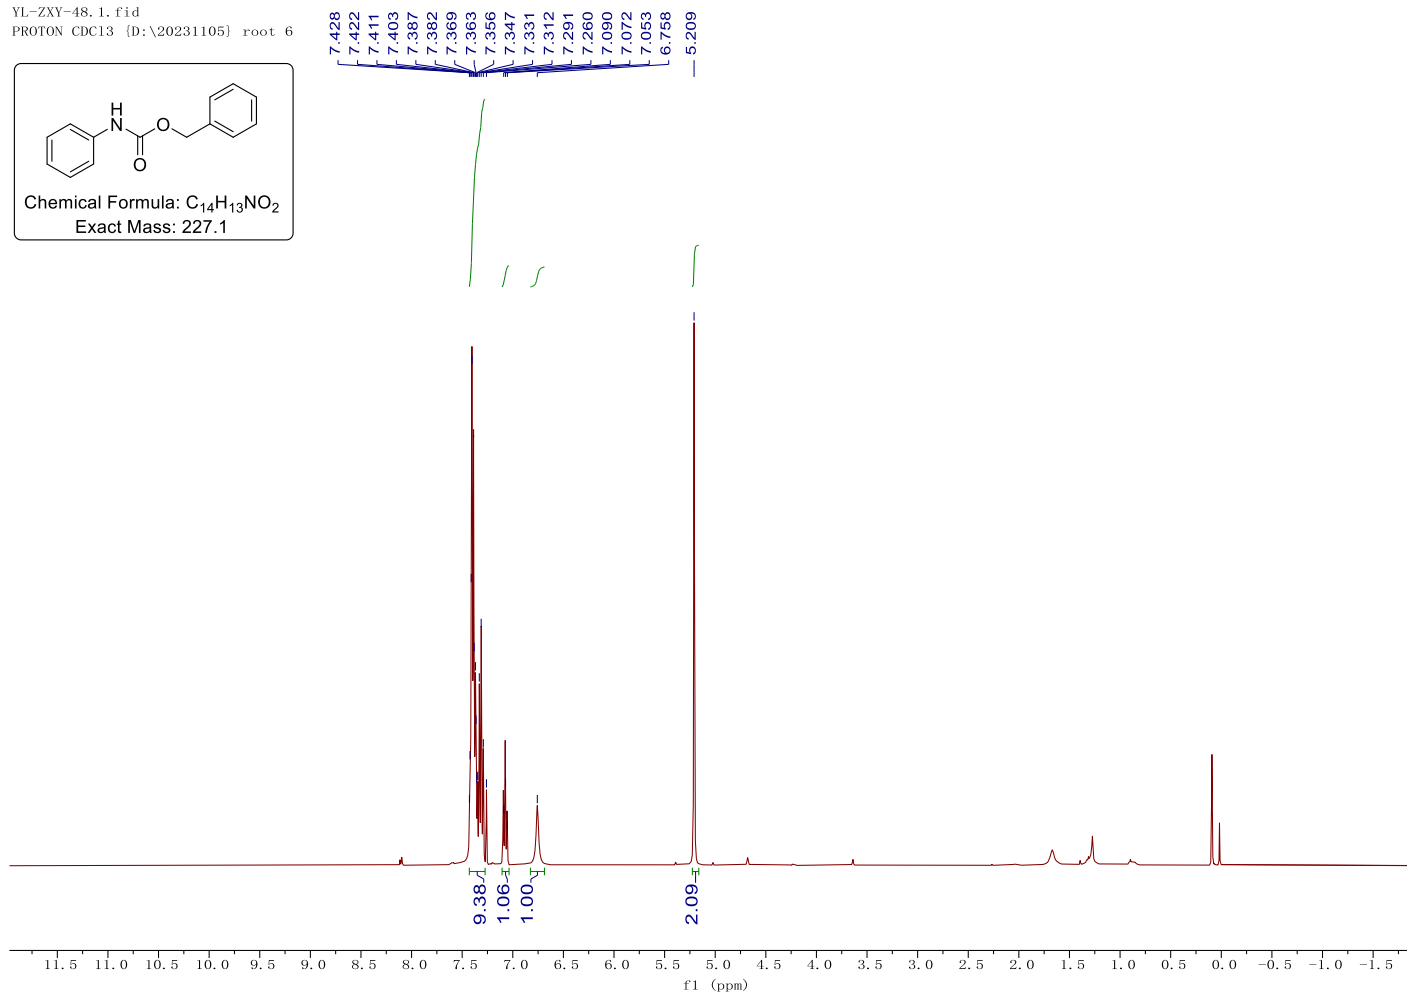

**$^{13}\text{C}\{^1\text{H}\}$  NMR (101 MHz,  $\text{CDCl}_3$ ) spectrum of compound **3af**.**

YZ-ZXY-48-2. 2. fid  
C13CPD CDC13 (D:\20231107) root 42

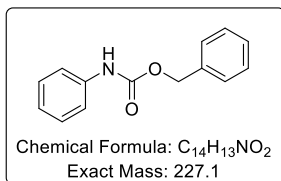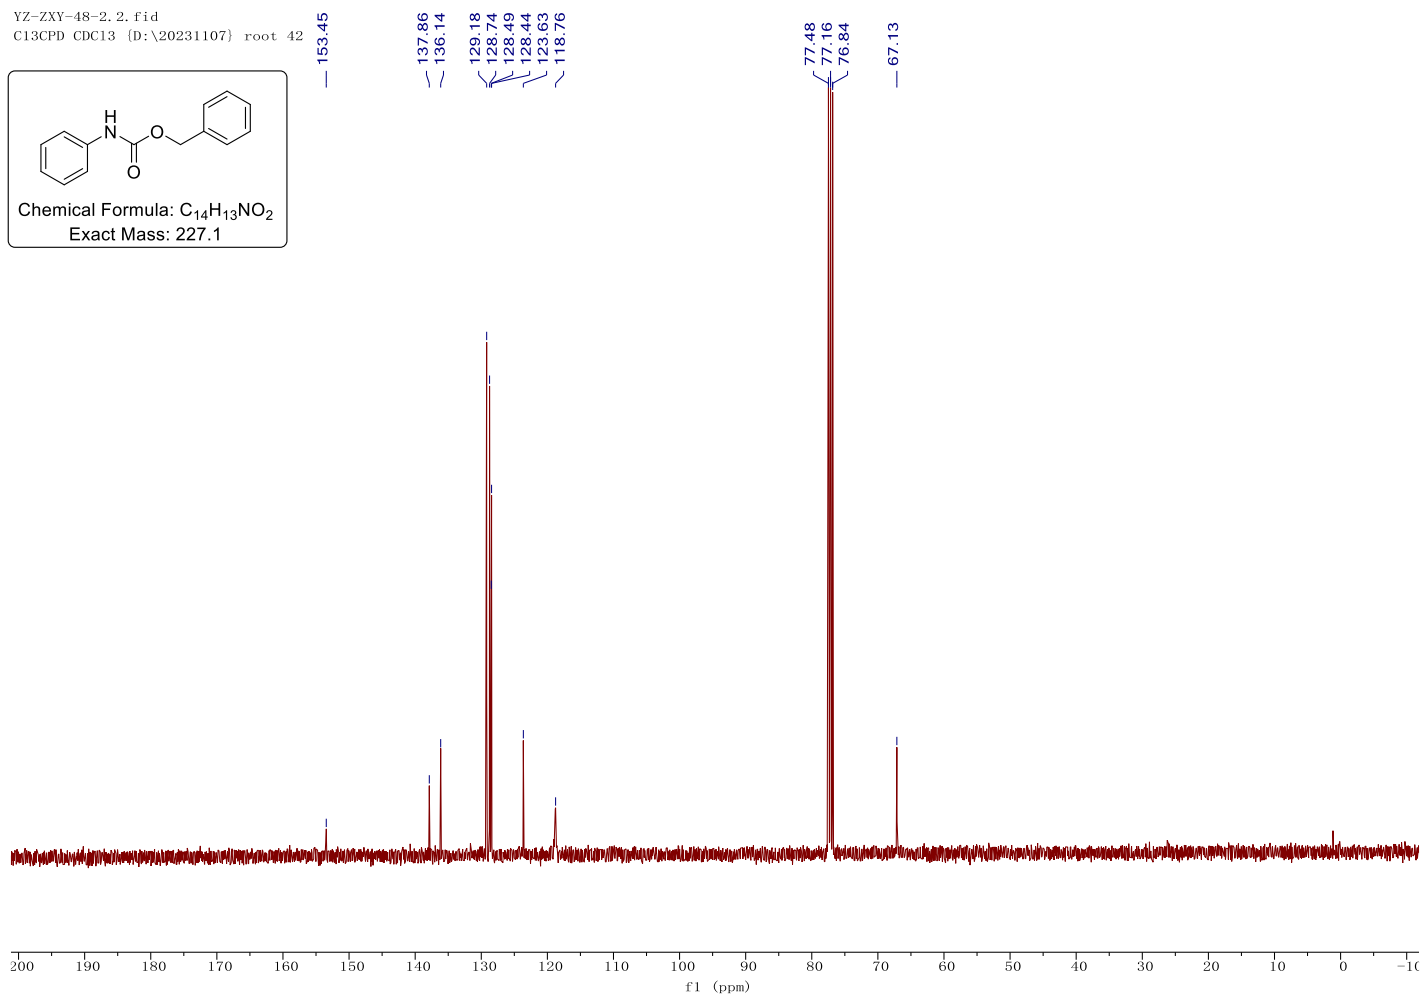



# <sup>1</sup>H NMR (400 MHz, CDCl<sub>3</sub>) spectrum of compound **3ag**.

YL-CXQ-822-P. 1. fid  
PROTON CDCl3 (D:\20230220) root

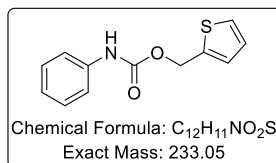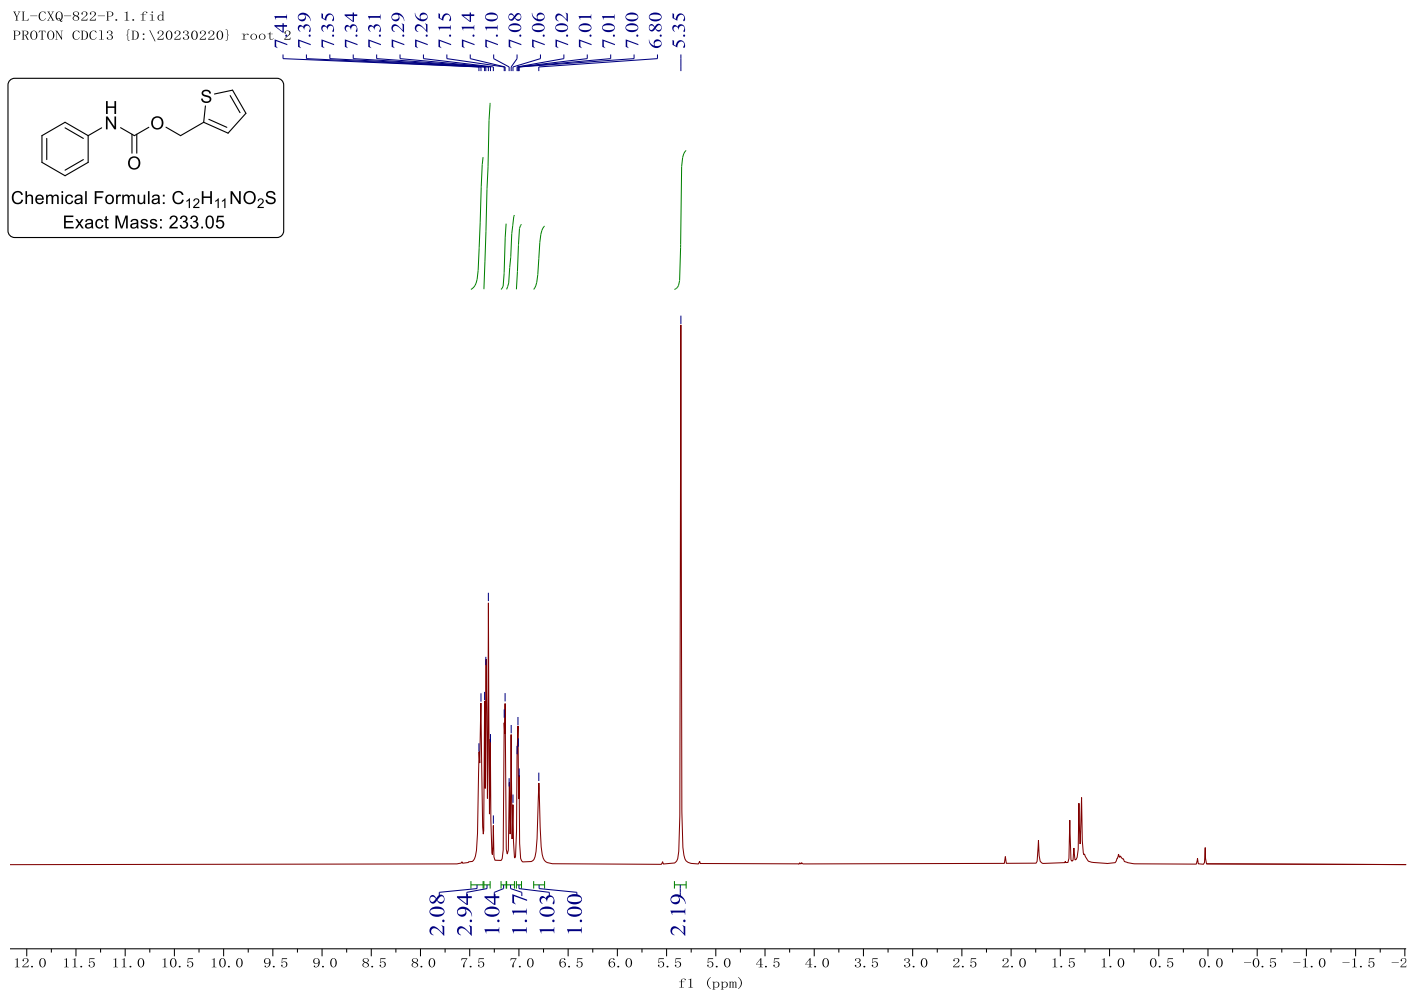

# $^{13}\text{C}\{^1\text{H}\}$ NMR (101 MHz, $\text{CDCl}_3$ ) spectrum of compound **3ag**.

YL-CXQ-822-P. 2. 1. 1r  
C13CPD CDCl3 (D:\20230220) root 2

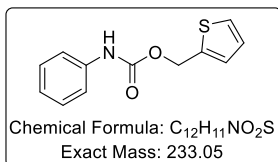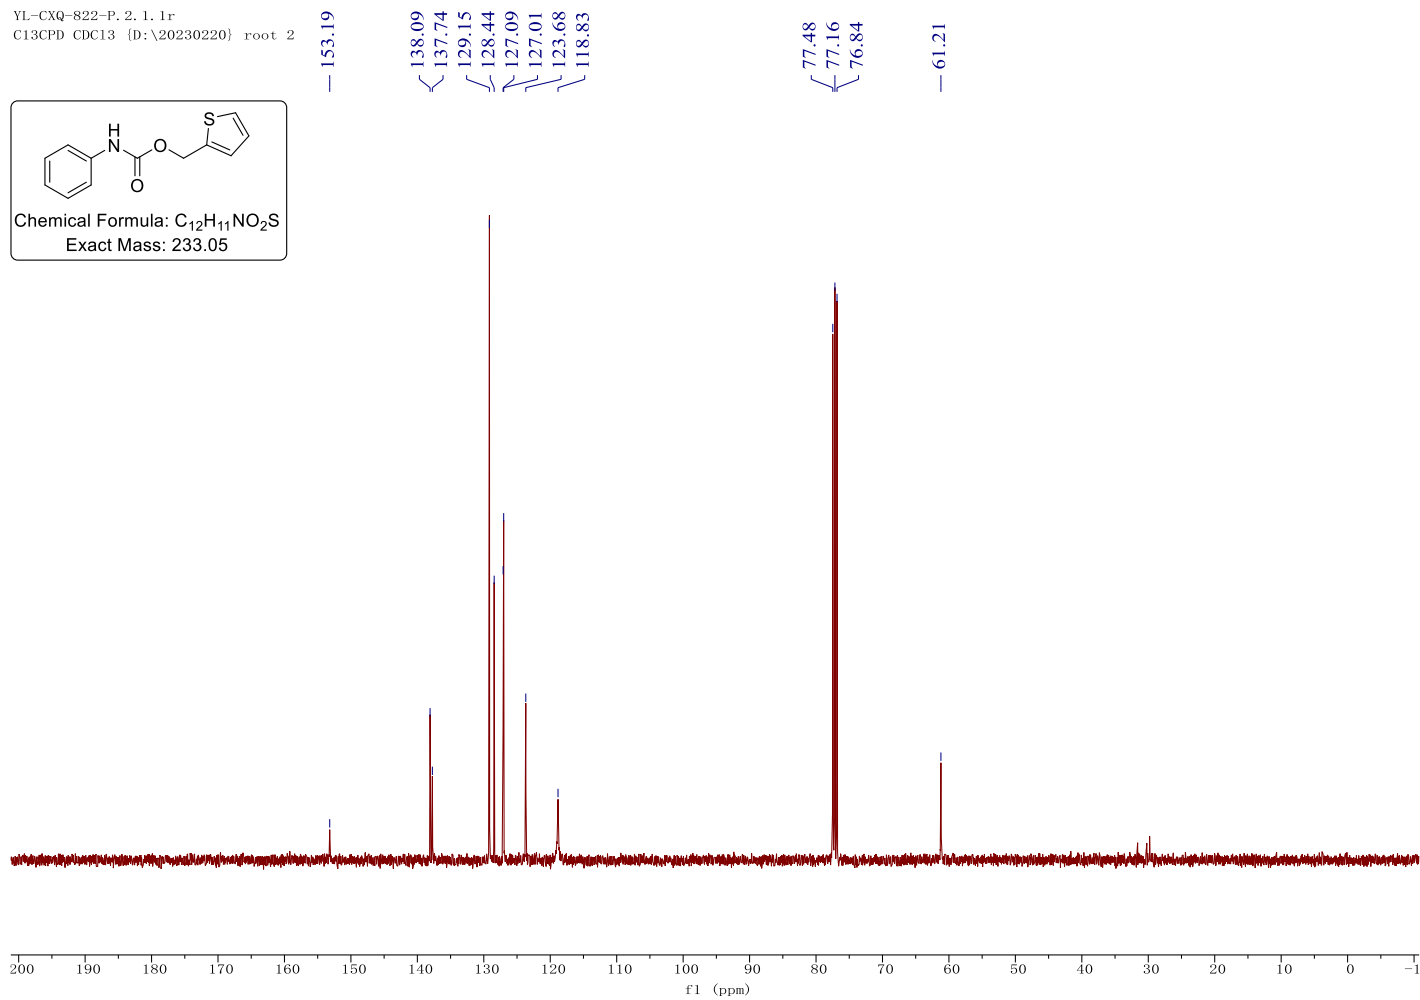

# <sup>1</sup>H NMR (400 MHz, CDCl<sub>3</sub>) spectrum of compound **3ah**.

YL-CXQ-841-P.1.fid  
PROTON CDCl3 (D:\20230225)

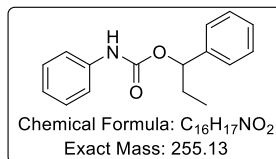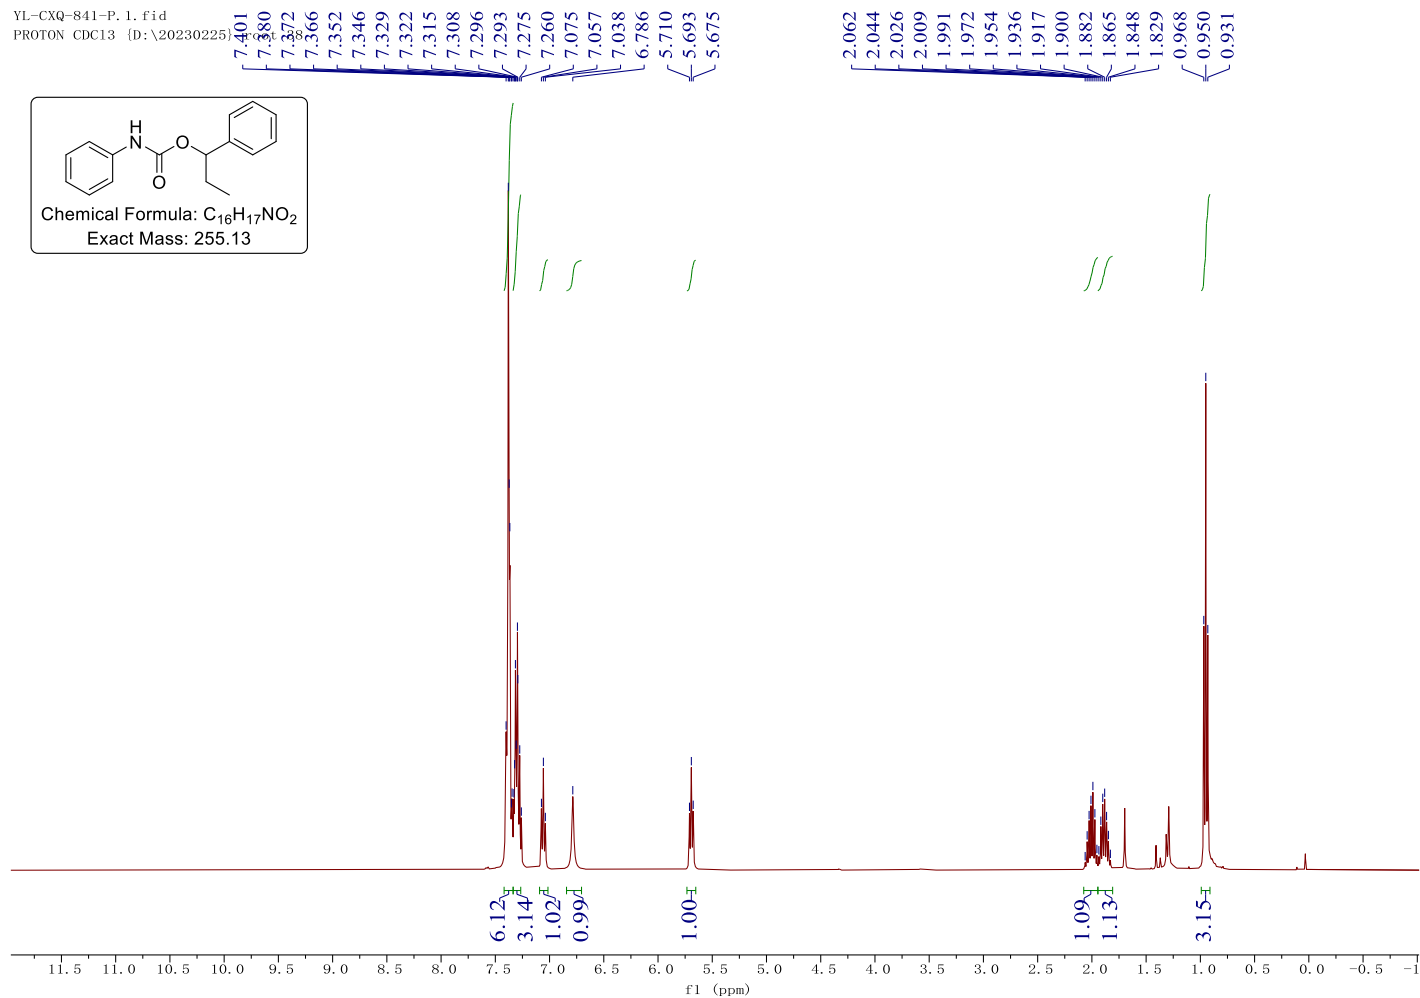

**$^{13}\text{C}\{^1\text{H}\}$  NMR (101 MHz,  $\text{CDCl}_3$ ) spectrum of compound **3ah**.**

YL-CXQ-841-P. 2. fid  
C13CPD CDCl3 (D:\20230225) root 38

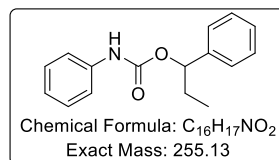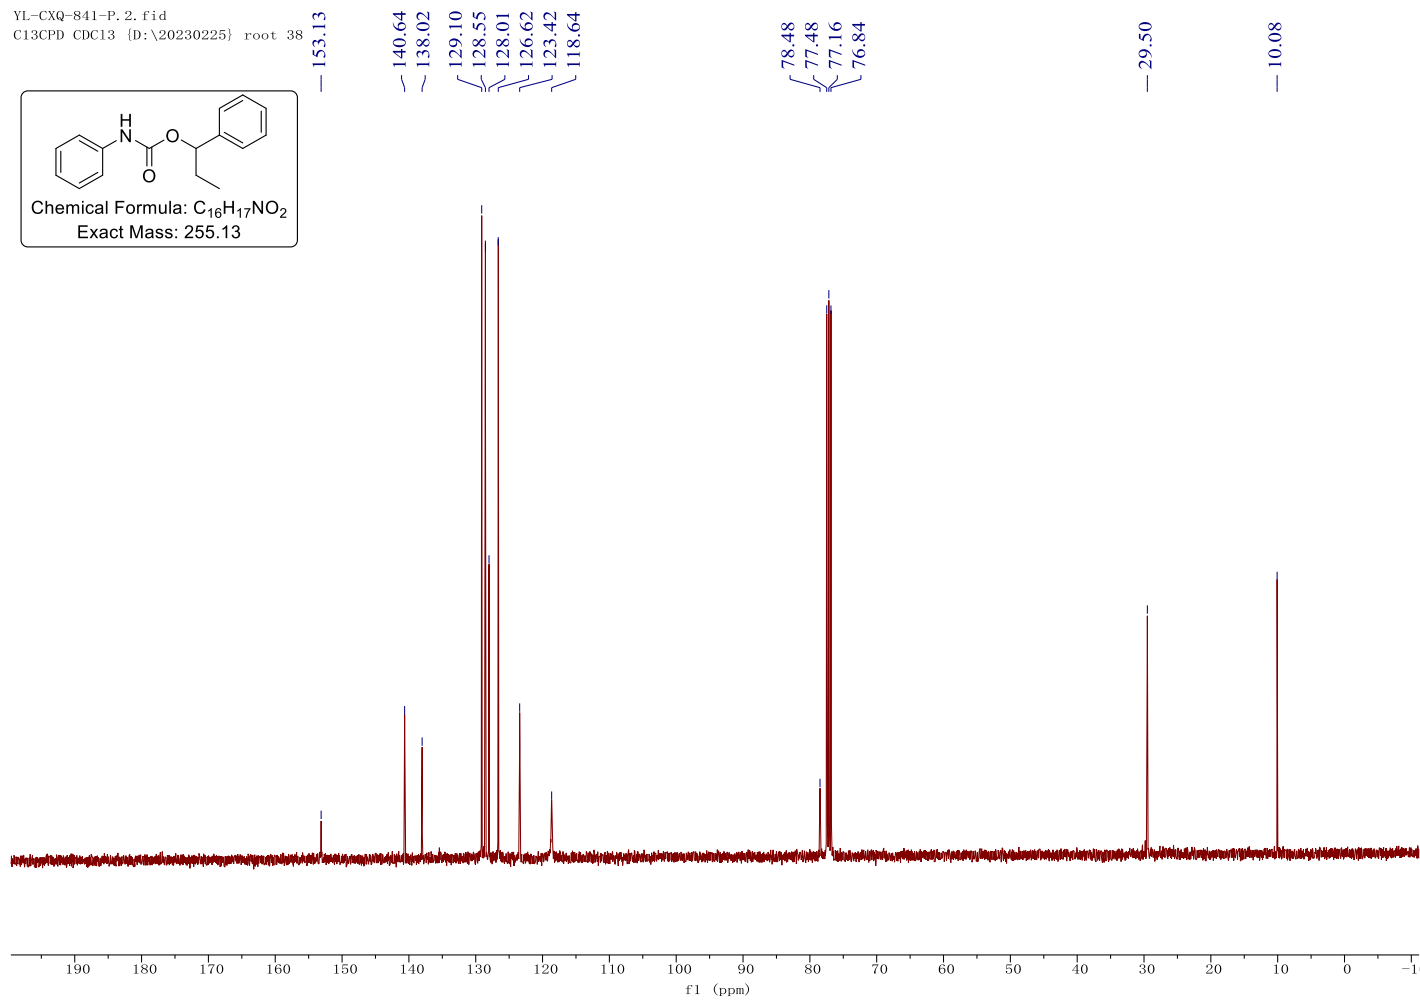

# <sup>1</sup>H NMR (400 MHz, CDCl<sub>3</sub>) spectrum of compound **3ai**.

YL-CXQ-824-P.1.fid  
PROTON CDCl<sub>3</sub> (D:\20230220) root 3

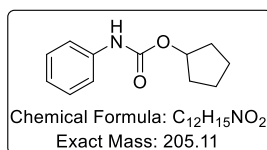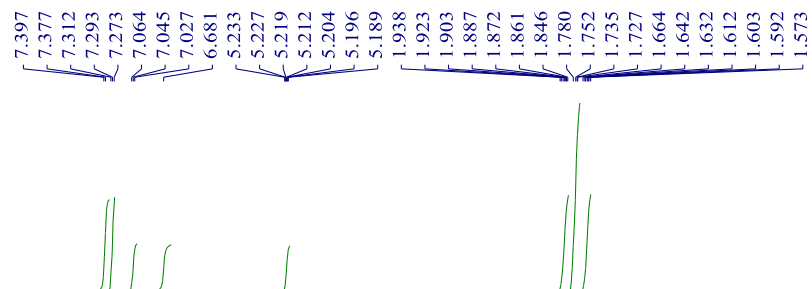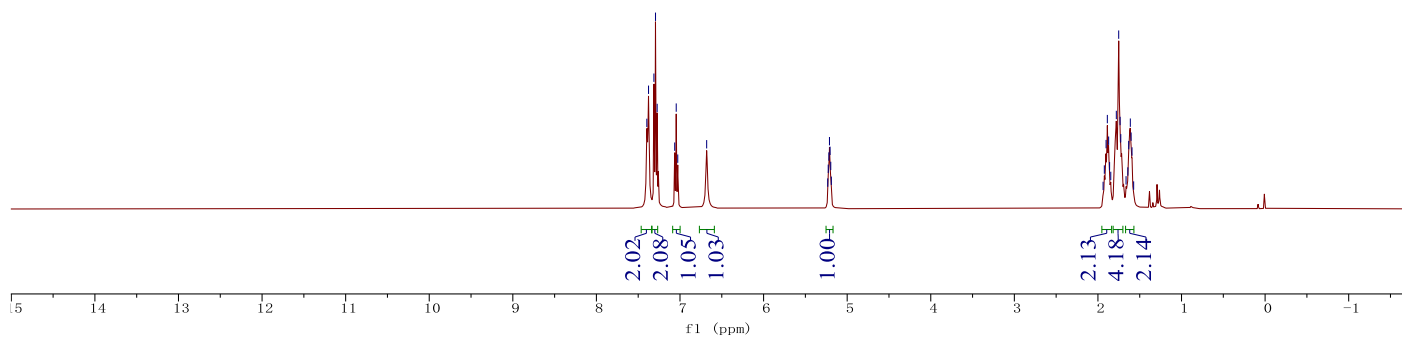

**$^{13}\text{C}\{^1\text{H}\}$  NMR (101 MHz,  $\text{CDCl}_3$ ) spectrum of compound **3ai**.**

YL-CXQ-824-P. 2. fid  
C13CPD CDC13 {D:\20230220} root 3

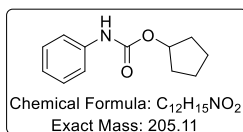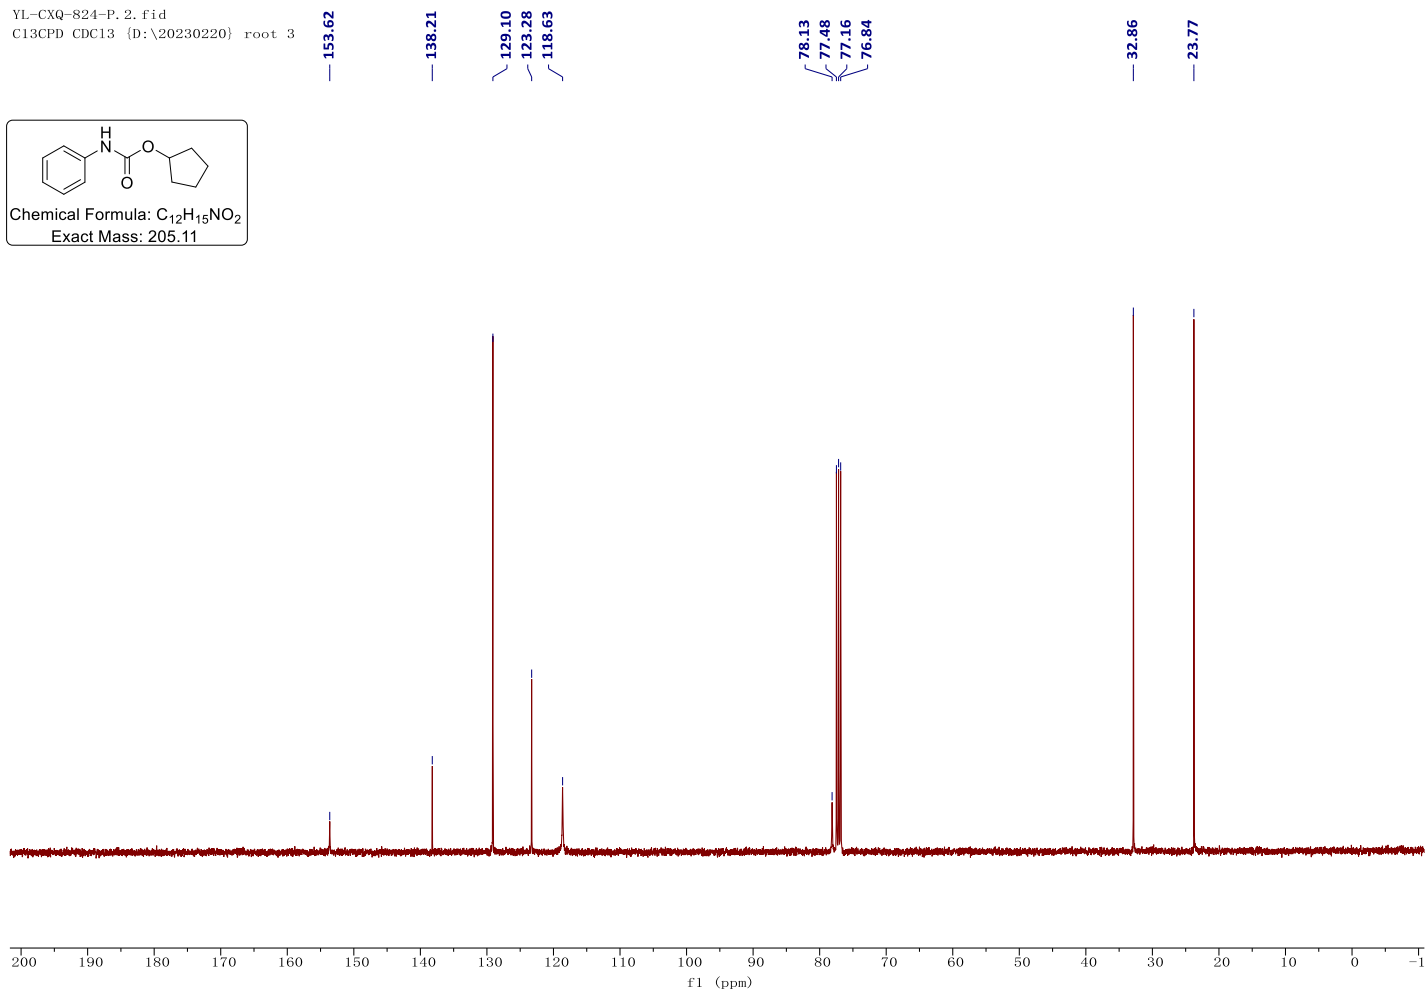

# <sup>1</sup>H NMR (400 MHz, CDCl<sub>3</sub>) spectrum of compound **3aj**.

YL-CXQ-799-P-H.1.fid  
PROTON CDCl<sub>3</sub> [D:\20221209] root 42

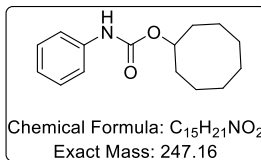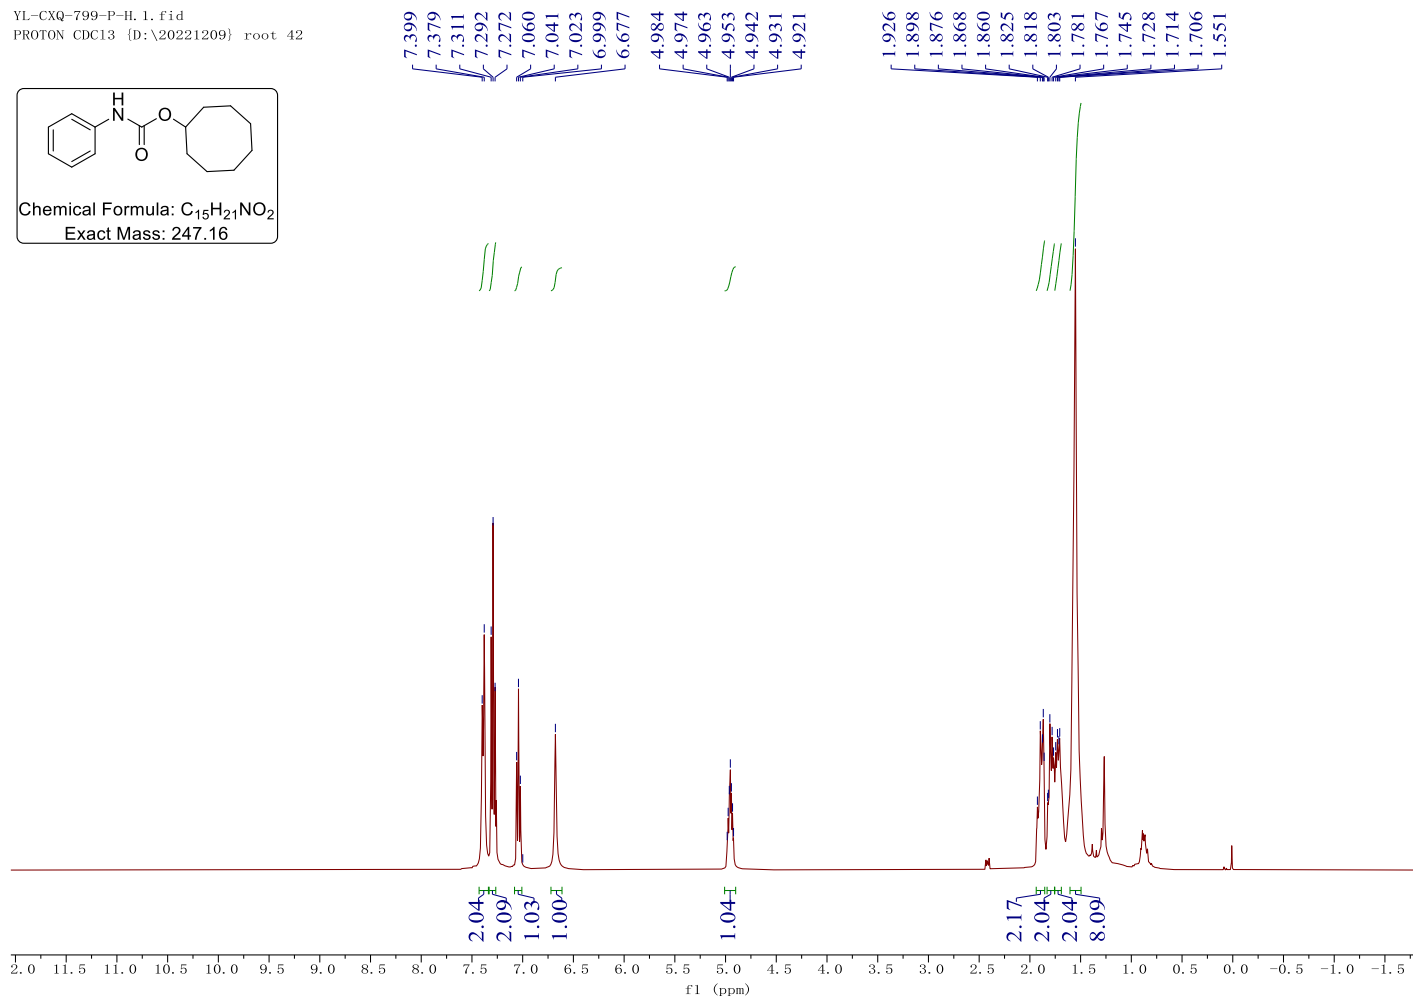

**$^{13}\text{C}\{^1\text{H}\}$  NMR (101 MHz,  $\text{CDCl}_3$ ) spectrum of compound **3aj**.**

YL-CXQ-799-P-C.1.fid  
C13CPD CDCl3 [D:\20230213} root 4

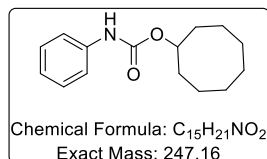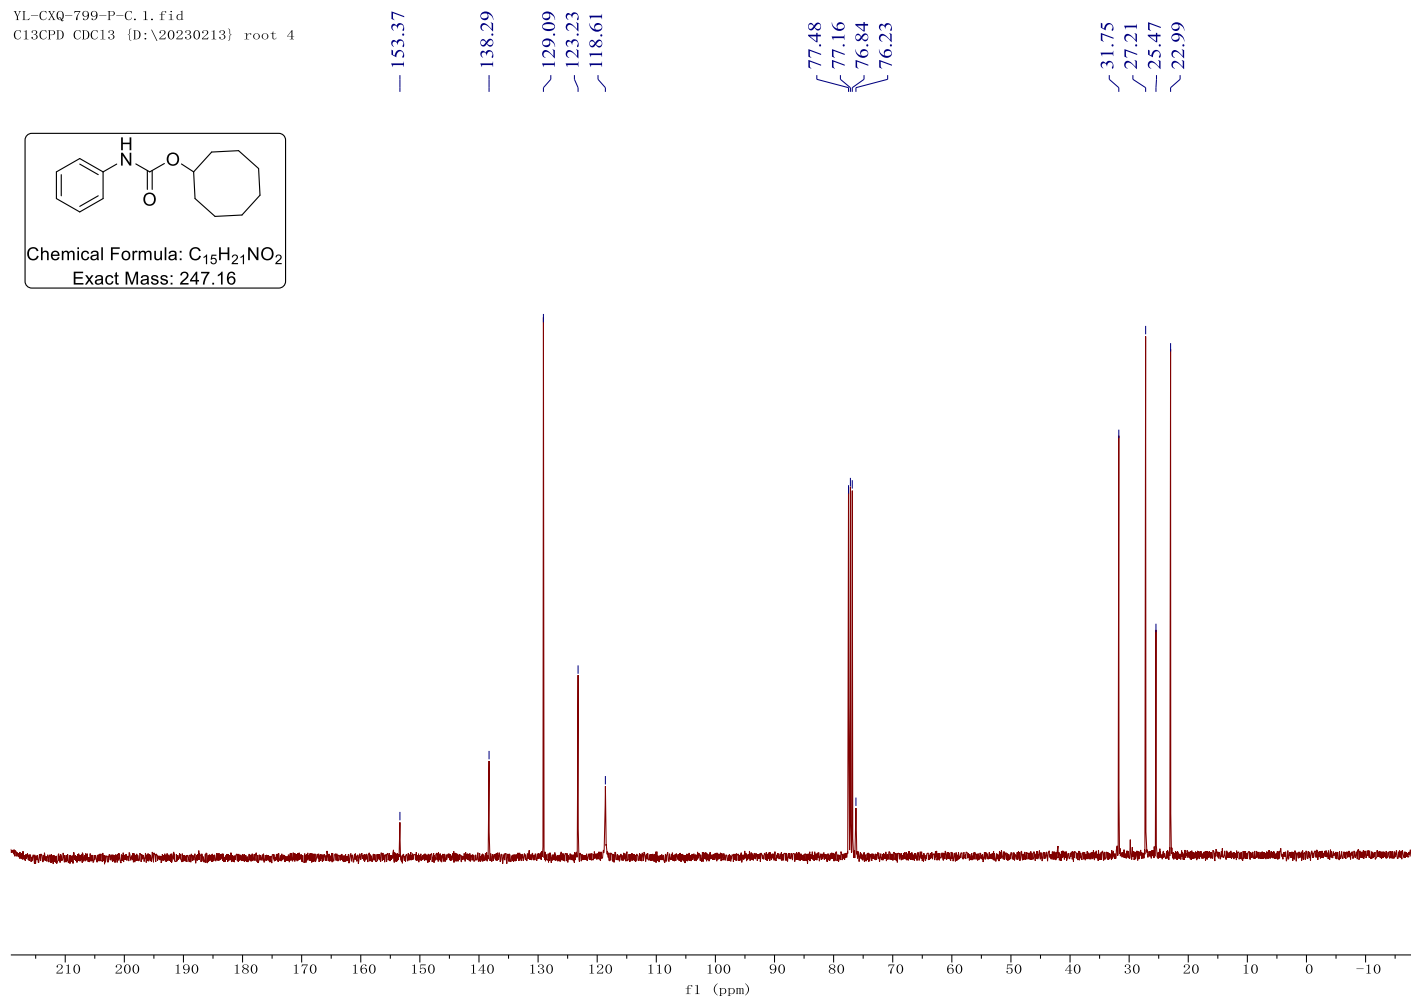



# <sup>1</sup>H NMR (400 MHz, CDCl<sub>3</sub>) spectrum of compound **3ak**.

YL-CXQ-843-P.1.fid  
PROTON CDCl<sub>3</sub> (D:\20230225) root 39

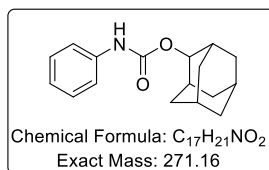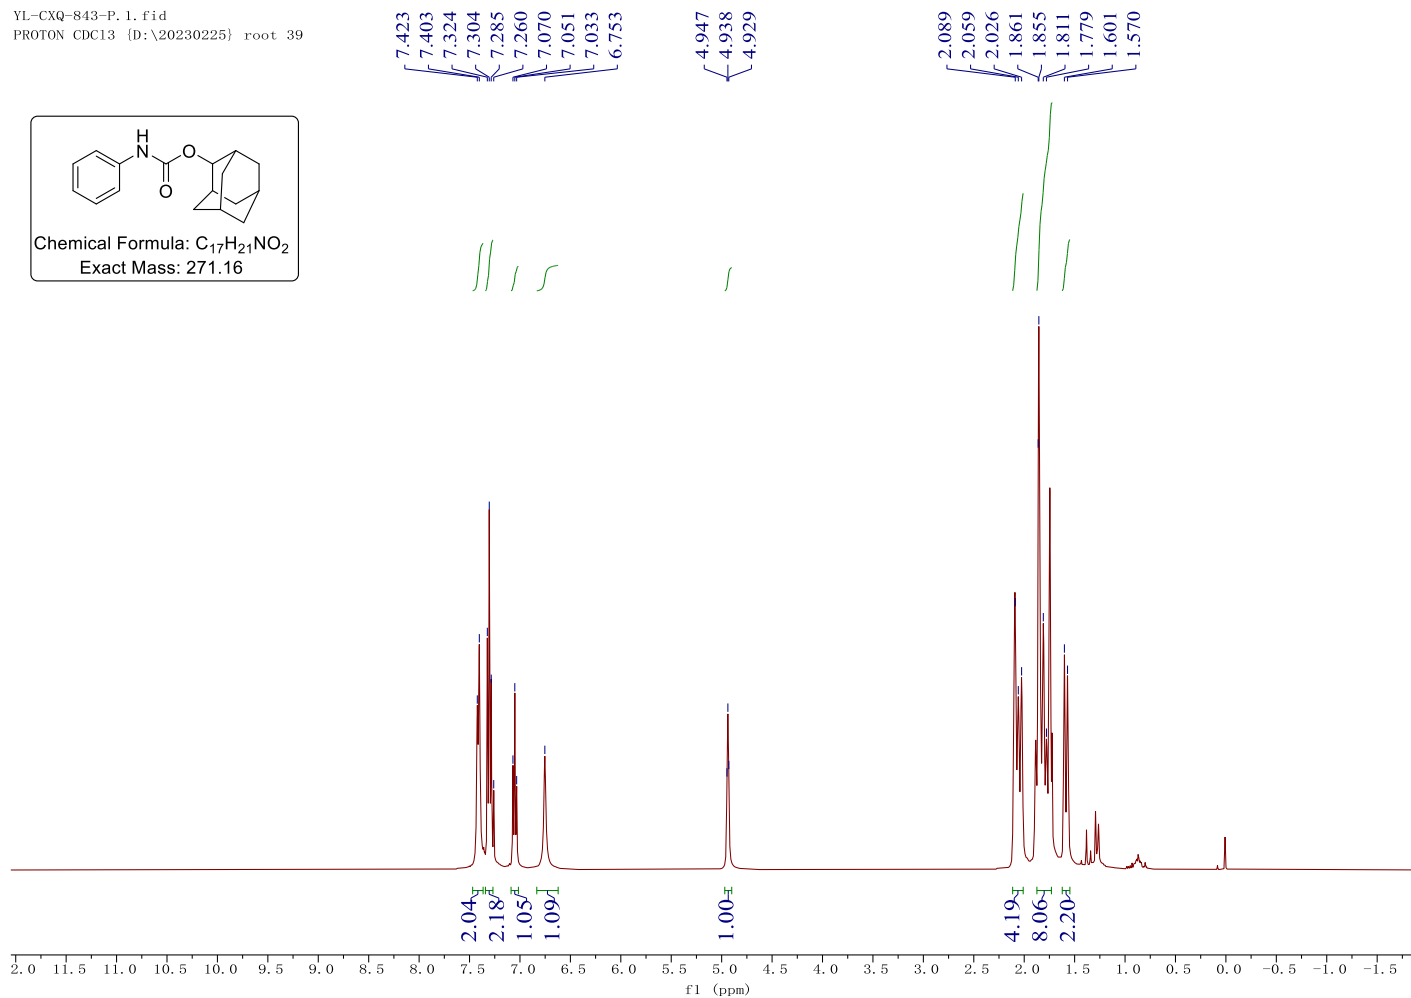

**$^{13}\text{C}\{^1\text{H}\}$  NMR (101 MHz,  $\text{CDCl}_3$ ) spectrum of compound **3ak**.**

YL-CXQ-843-P. 2. fid  
C13CPD CDCl3 [D:\20230225] root 39

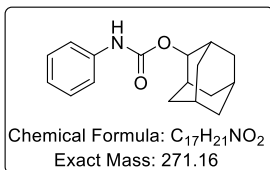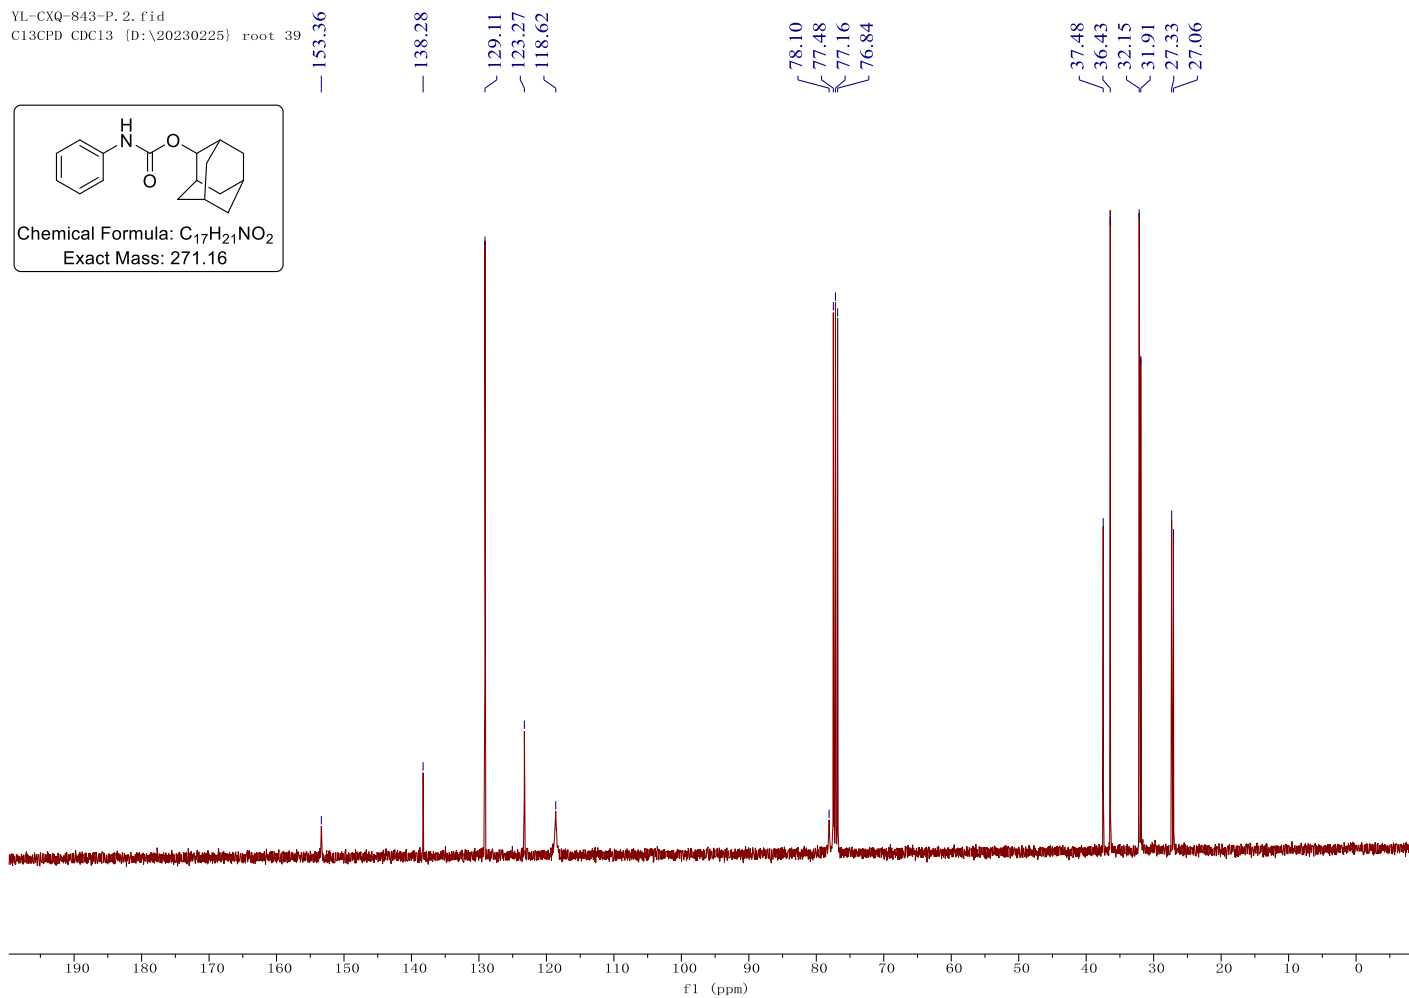

# <sup>1</sup>H NMR (400 MHz, CDCl<sub>3</sub>) spectrum of compound **3al**.

YL-CXQ-842-P. 1. fid  
PROTON CDCl<sub>3</sub> [D:\20230303} root 45

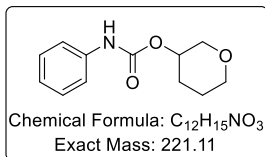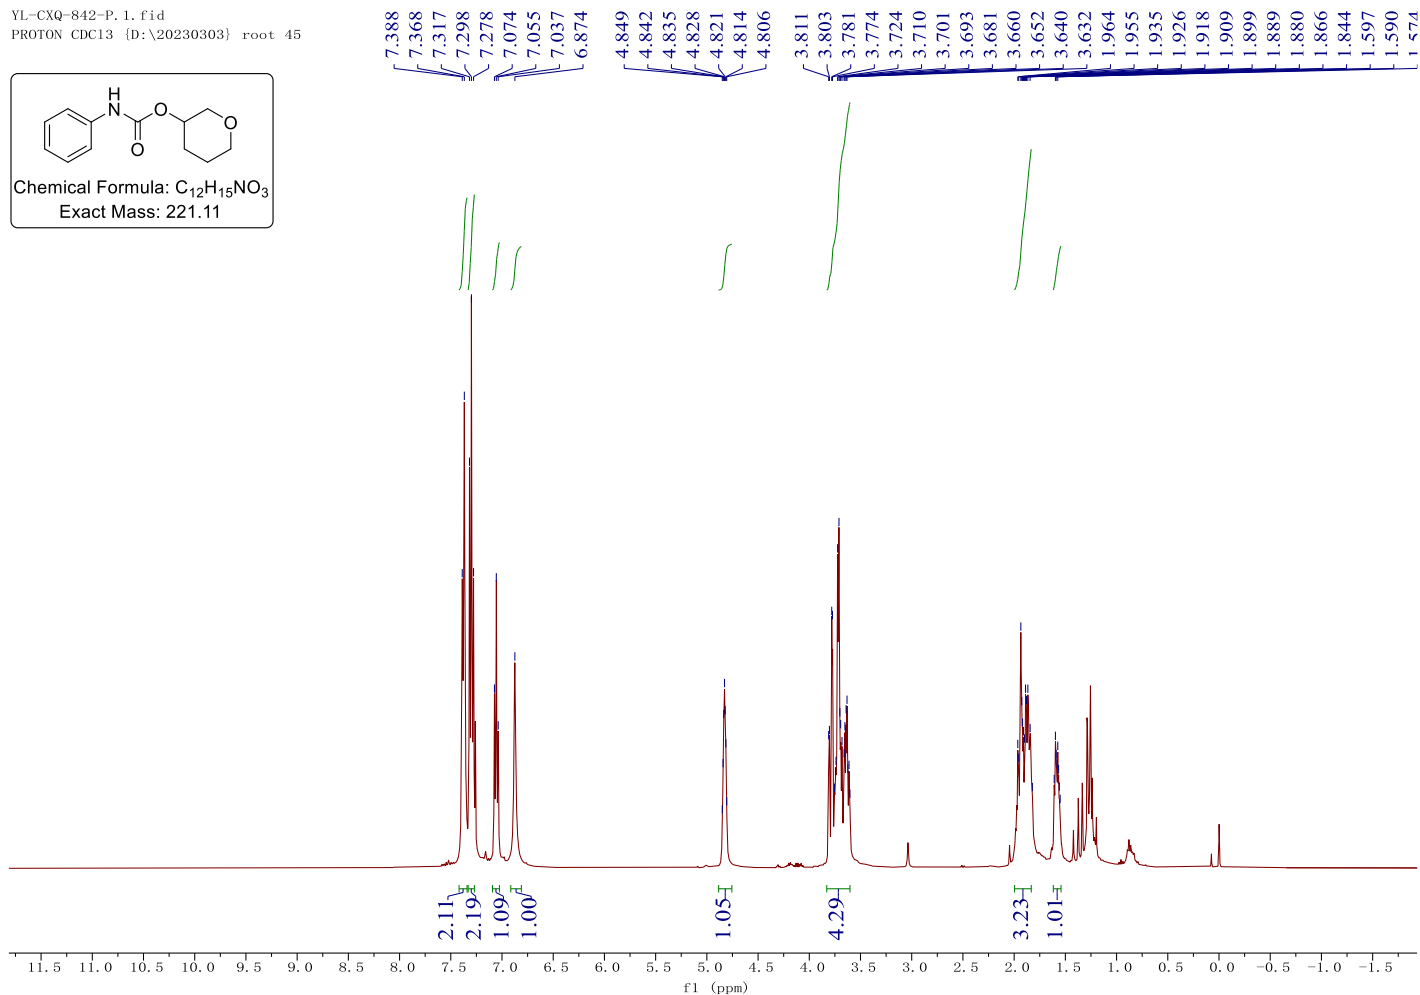

**$^{13}\text{C}\{^1\text{H}\}$  NMR (101 MHz,  $\text{CDCl}_3$ ) spectrum of compound **3al**.**

YZ-ZXY-19-2.2.fid  
C13CPD CDCl3 {D:\20231107} root 41

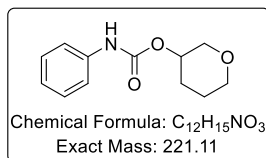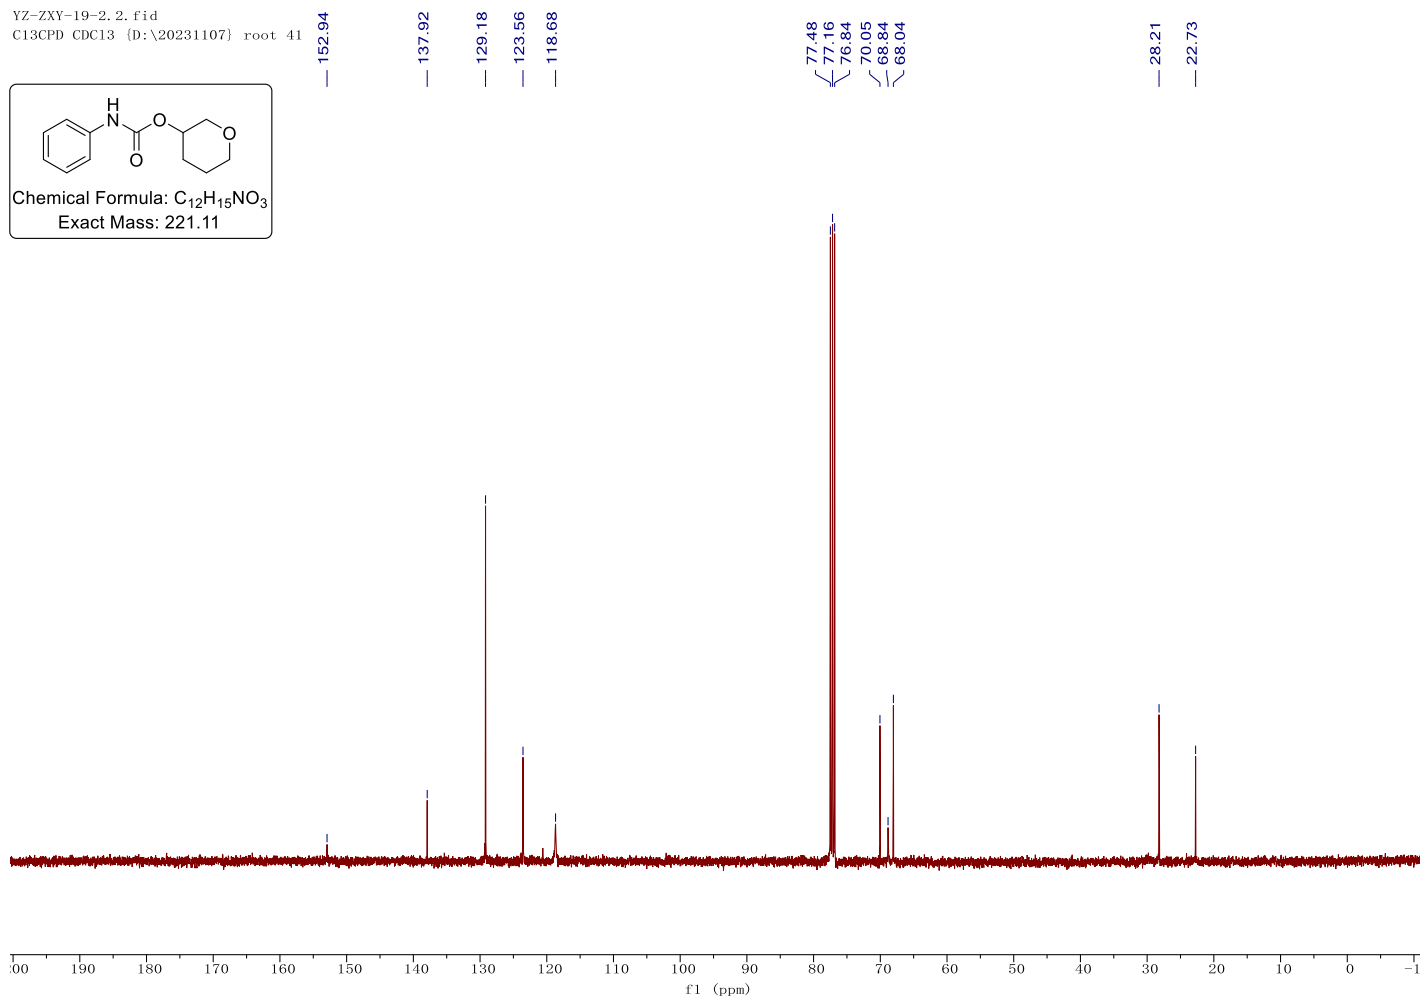

# <sup>1</sup>H NMR (400 MHz, CDCl<sub>3</sub>) spectrum of compound **3am**.

YL-CXQ-900-P-H.1.fid  
PROTON CDC13 {D:\20230424} root 8

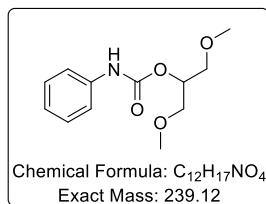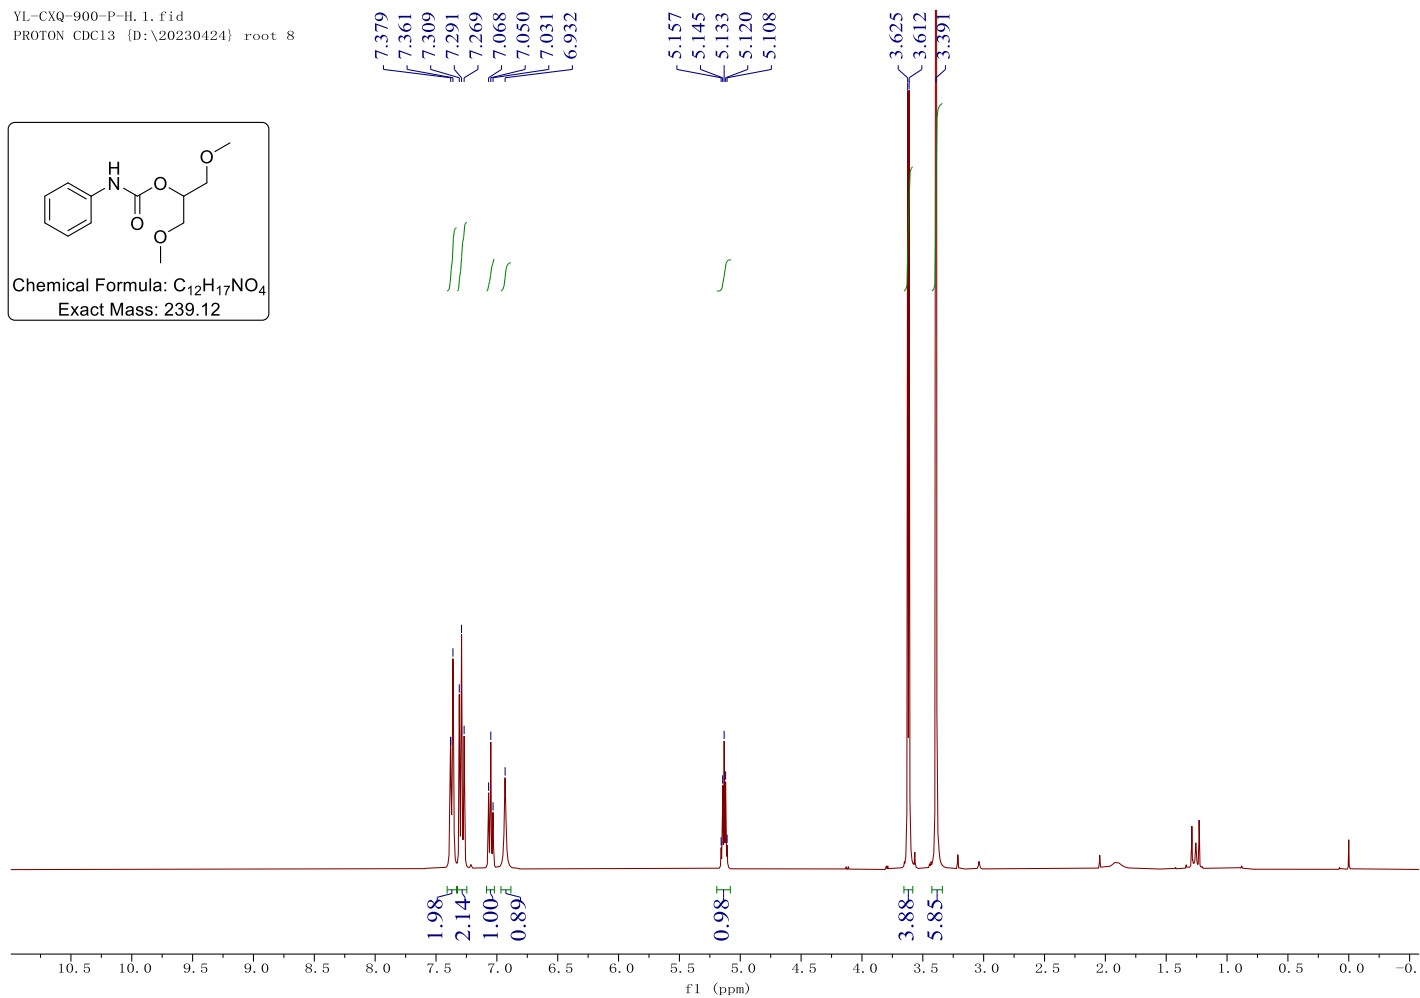

**$^{13}\text{C}\{^1\text{H}\}$  NMR (101 MHz,  $\text{CDCl}_3$ ) spectrum of compound **3am**.**

YL-ZXY-900.1.fid  
C13CPD CDC13 {D:\20231224} root 53

— 152.90 — 137.88 — 129.15 — 123.55 — 118.64 — 77.48 — 77.16 — 76.85 — 72.05 — 71.39 — 59.39

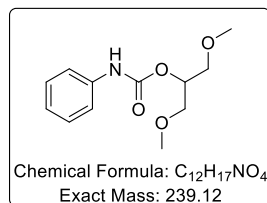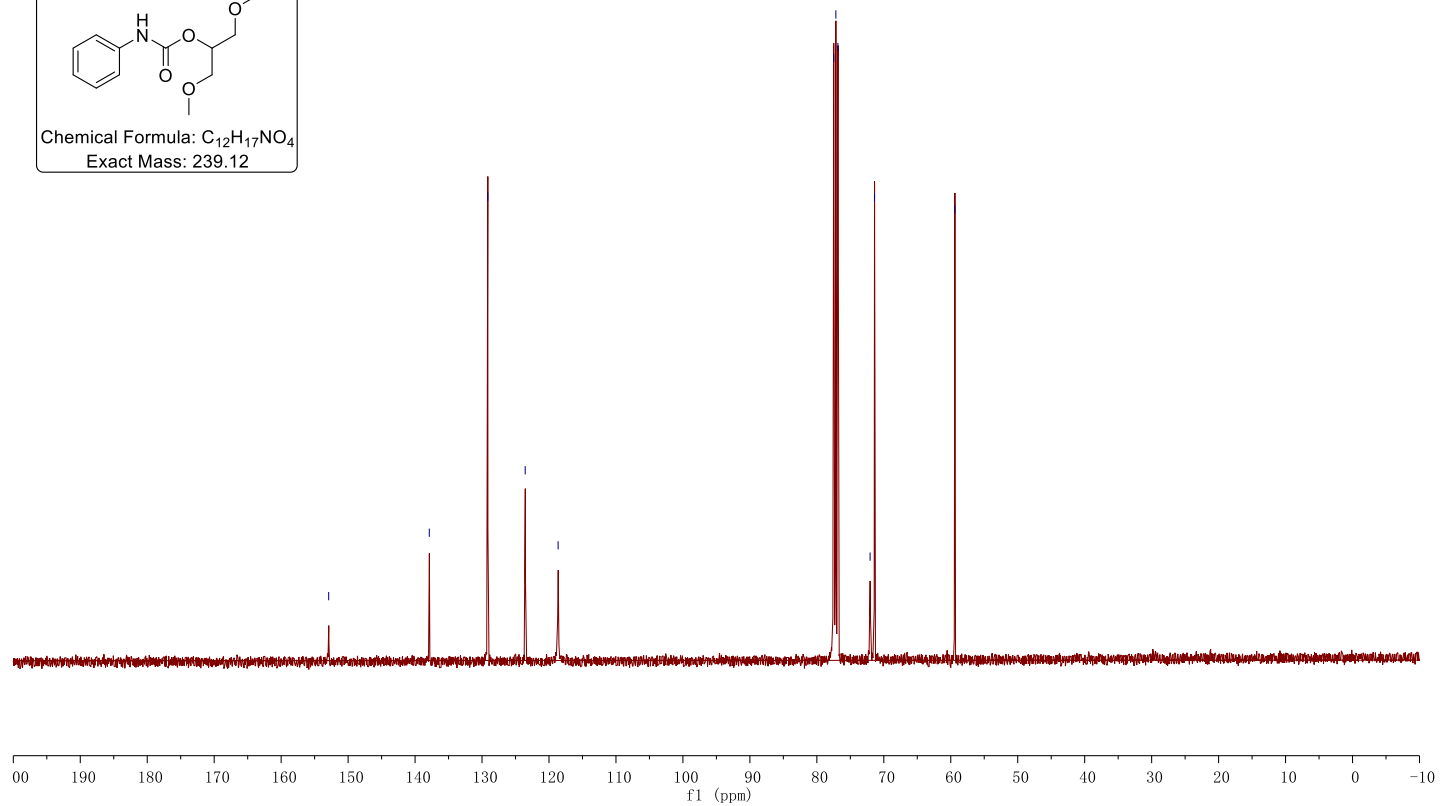

# <sup>1</sup>H NMR (400 MHz, CDCl<sub>3</sub>) spectrum of compound **3an**.

YL-CXQ-801-P-H.1.fid  
PROTON CDCl3 [D:\20221209] root 43

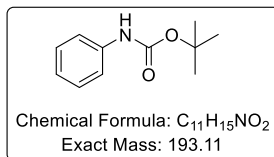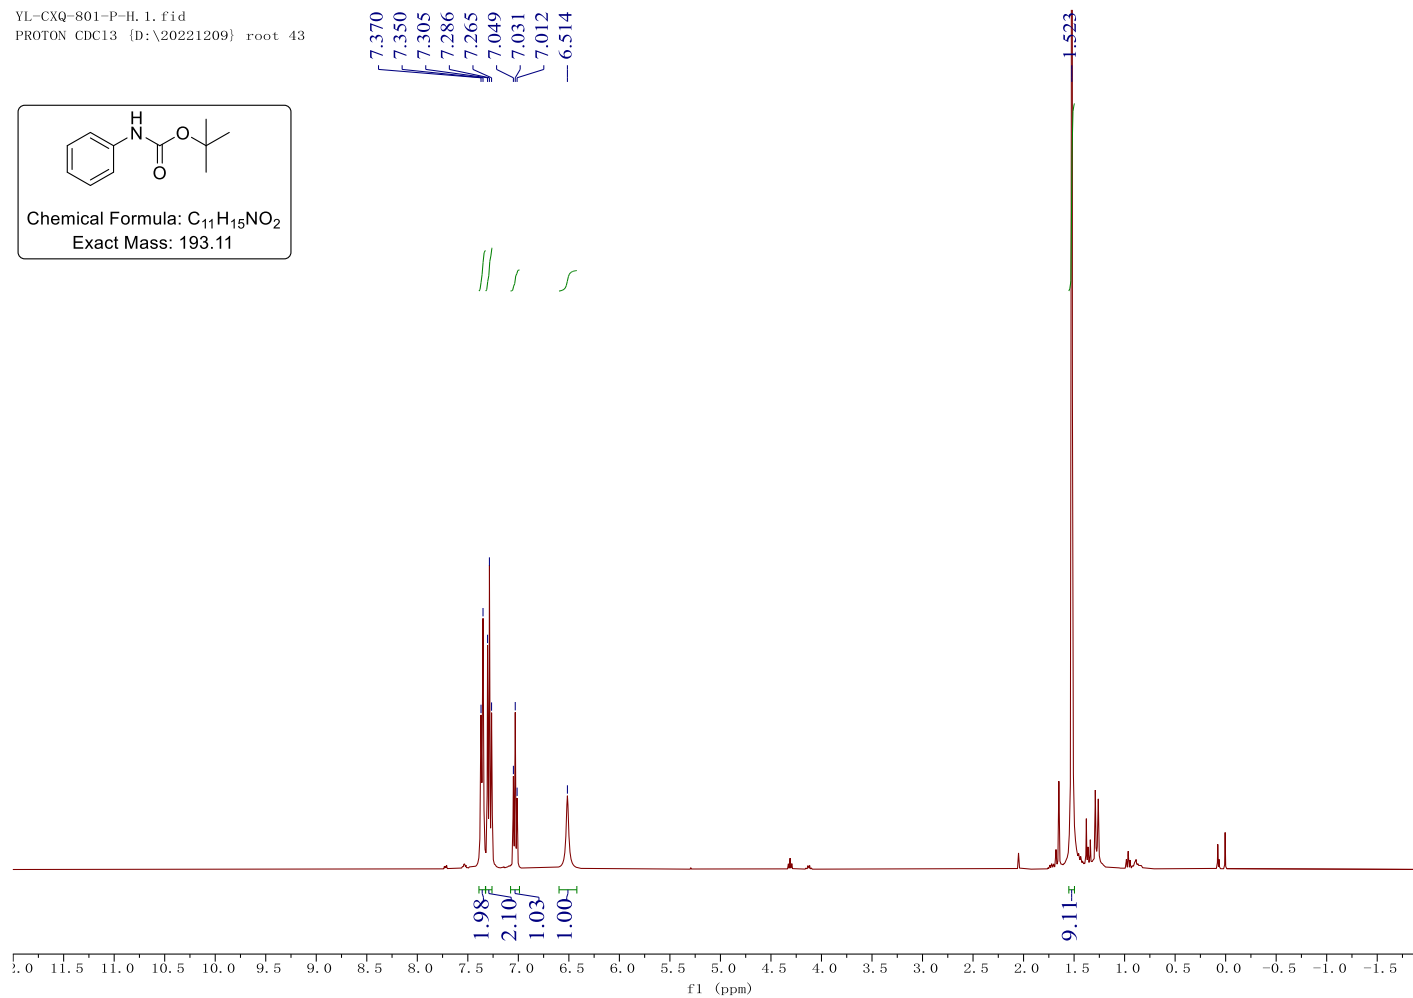

$^{13}\text{C}\{^1\text{H}\}$  NMR (101 MHz,  $\text{CDCl}_3$ ) spectrum of compound **3an**.

YL-CXQ-801-P-C.1.fid  
C13CPD CDCl3 [D:\20230213] root 5

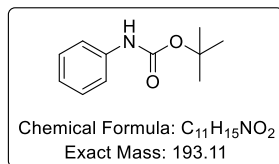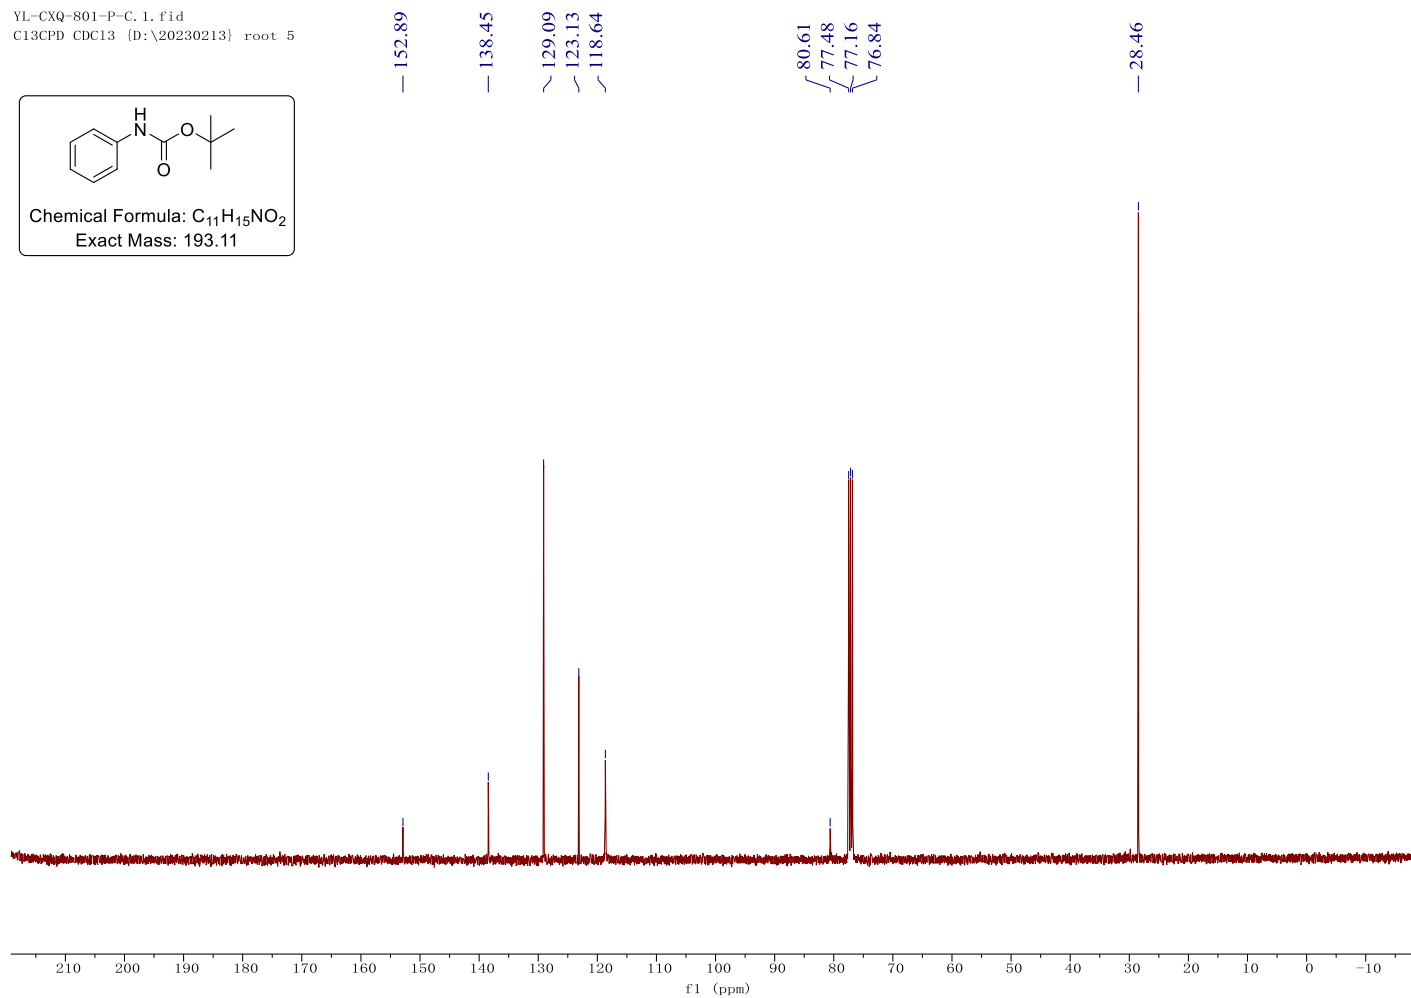



# <sup>1</sup>H NMR (400 MHz, CDCl<sub>3</sub>) spectrum of compound **3ao**.

YL-CXQ-844-P. 1. fid  
PROTON CDCl<sub>3</sub> [D:\20230225] root 4

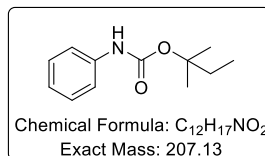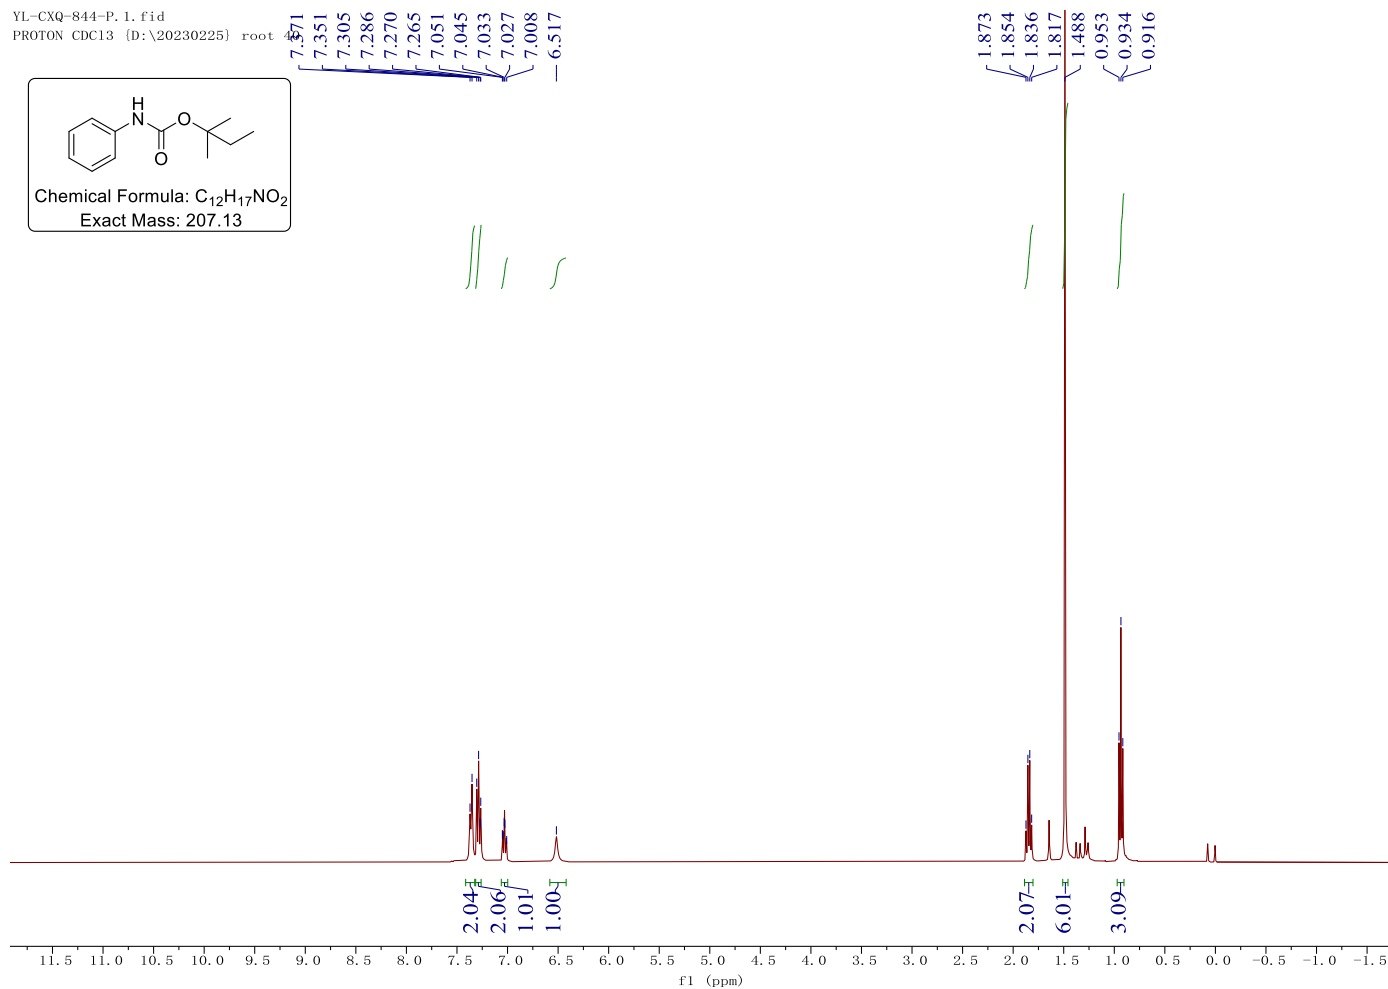

**$^{13}\text{C}\{^1\text{H}\}$  NMR (101 MHz,  $\text{CDCl}_3$ ) spectrum of compound **3ao**.**

YL-CXQ-844-P. 2. fid  
C13CPD CDC13 {D:\20230225} root 40

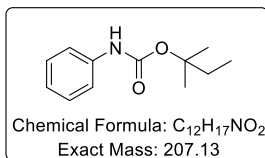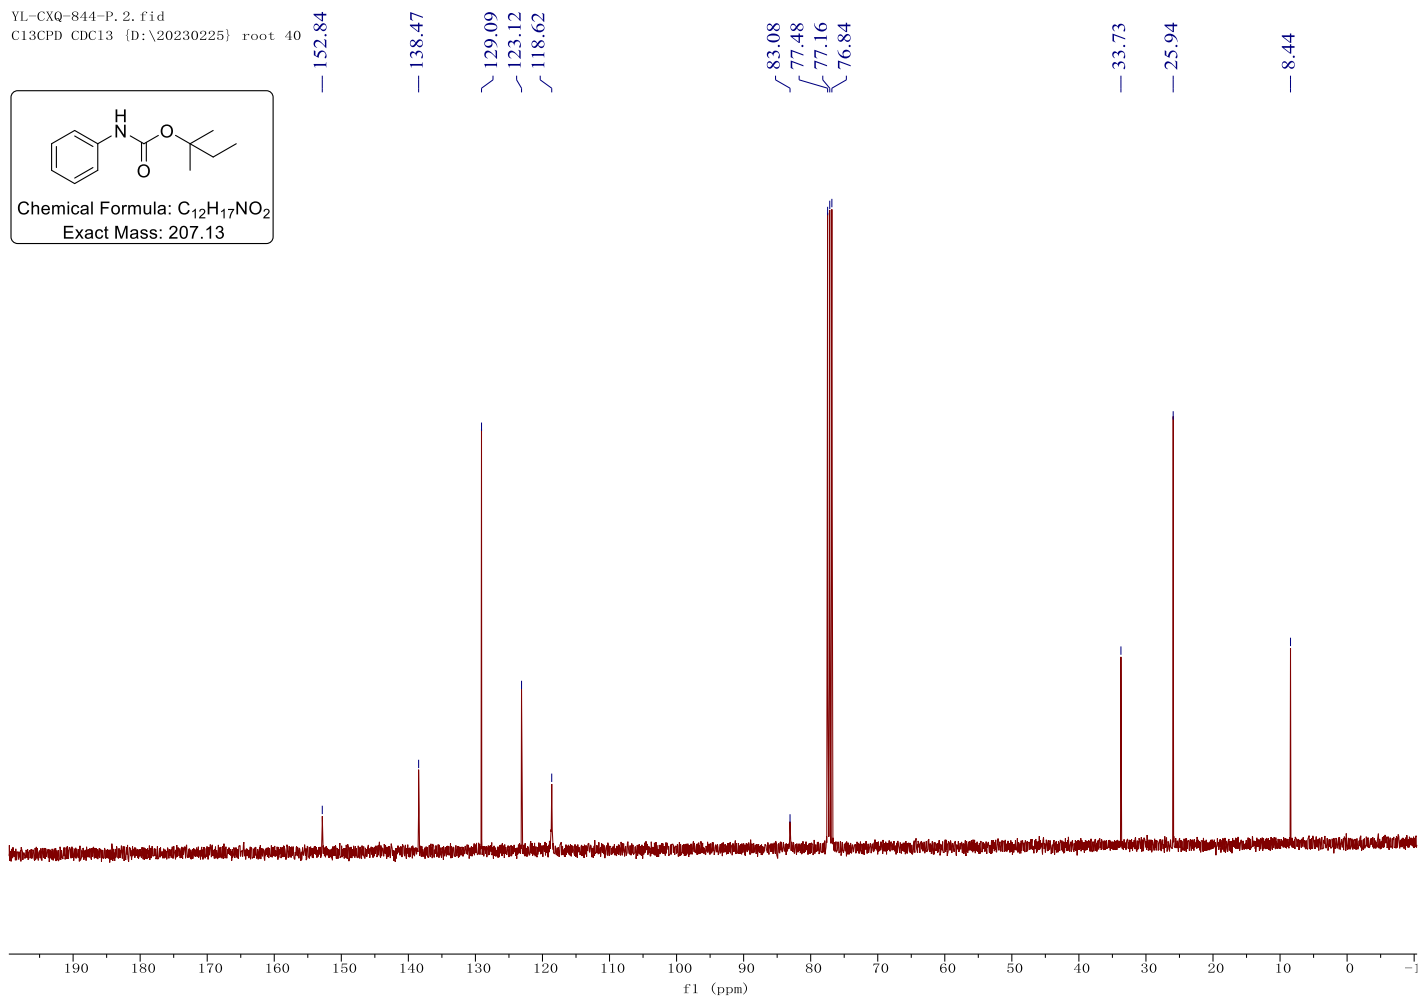

# <sup>1</sup>H NMR (400 MHz, CDCl<sub>3</sub>) spectrum of compound **3ap**.

YL-CXQ-845-P. 1. fid  
PROTON CDCl3 [D:\20230225] root 41

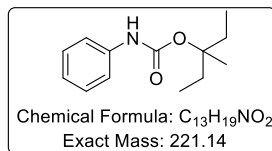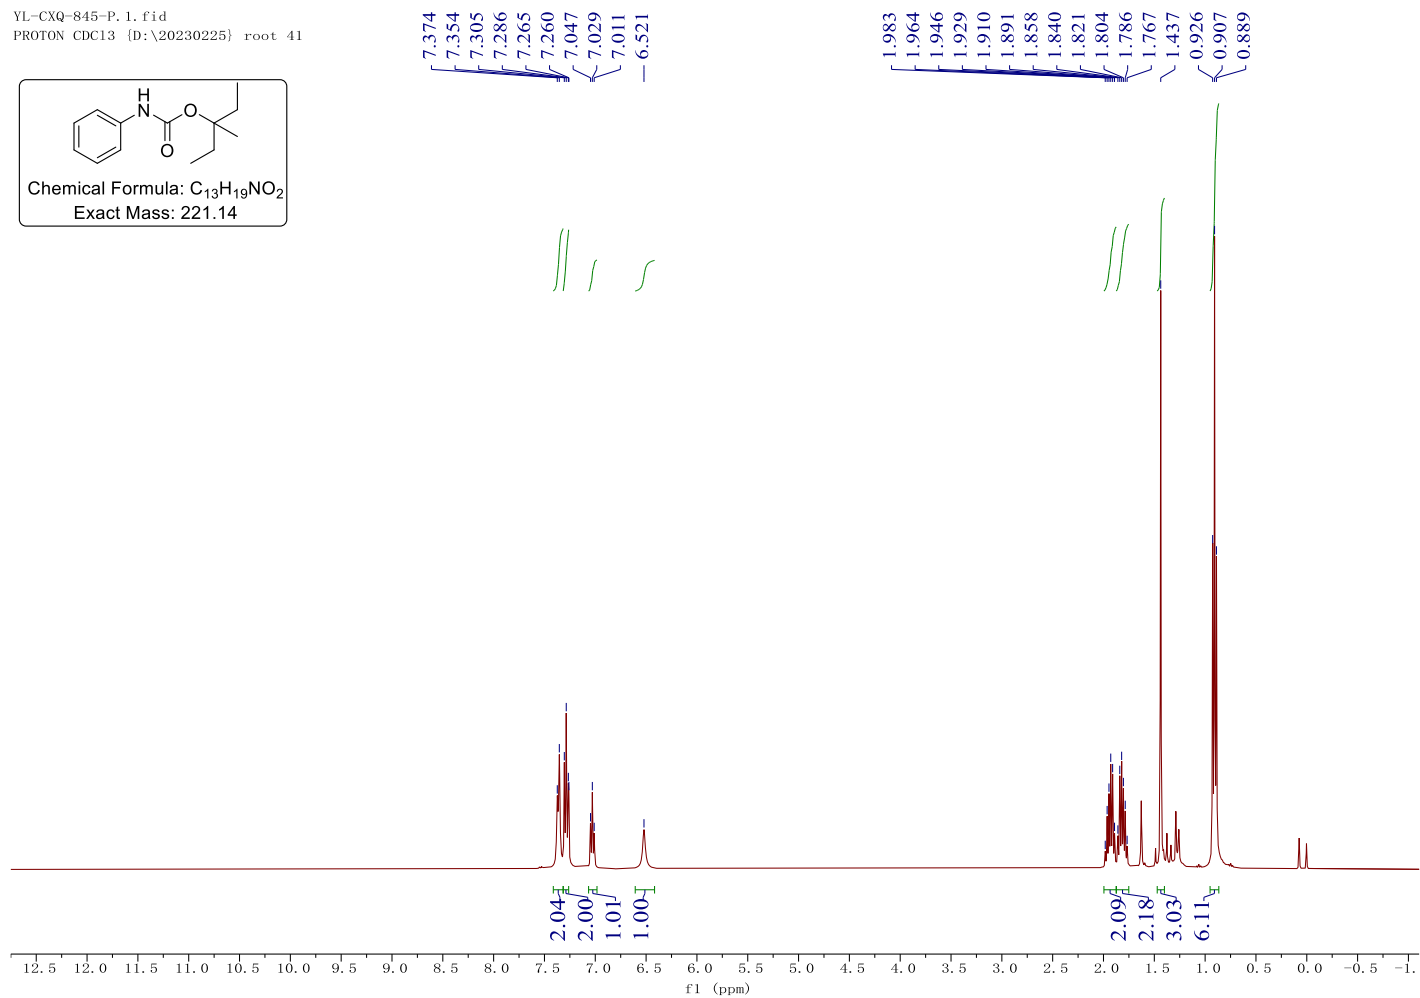

**$^{13}\text{C}\{^1\text{H}\}$  NMR (101 MHz,  $\text{CDCl}_3$ ) spectrum of compound **3ap**.**

YL-CXQ-845-P. 2. fid  
C13CPD CDC13 (D:\20230225) root 41

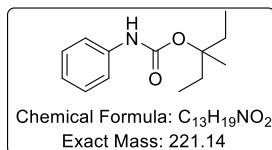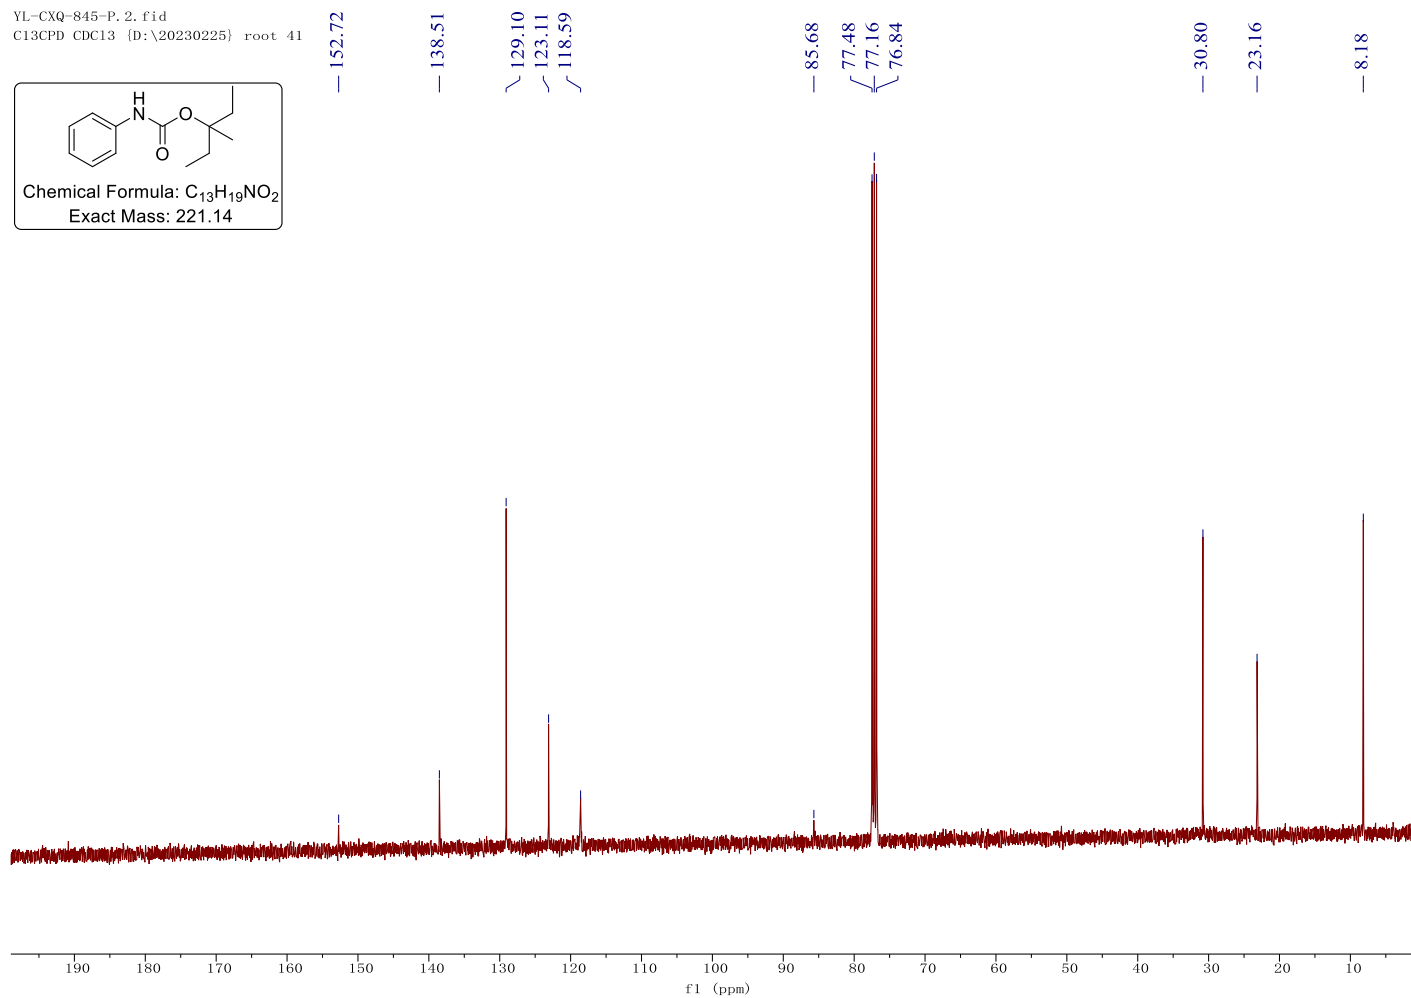

# <sup>1</sup>H NMR (400 MHz, CDCl<sub>3</sub>) spectrum of compound **3aq**.

YL-CXQ-847-P. 1. fid  
PROTON CDCl<sub>3</sub> [D:\20230302] root 37

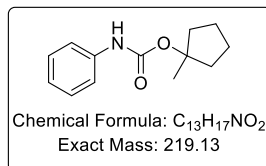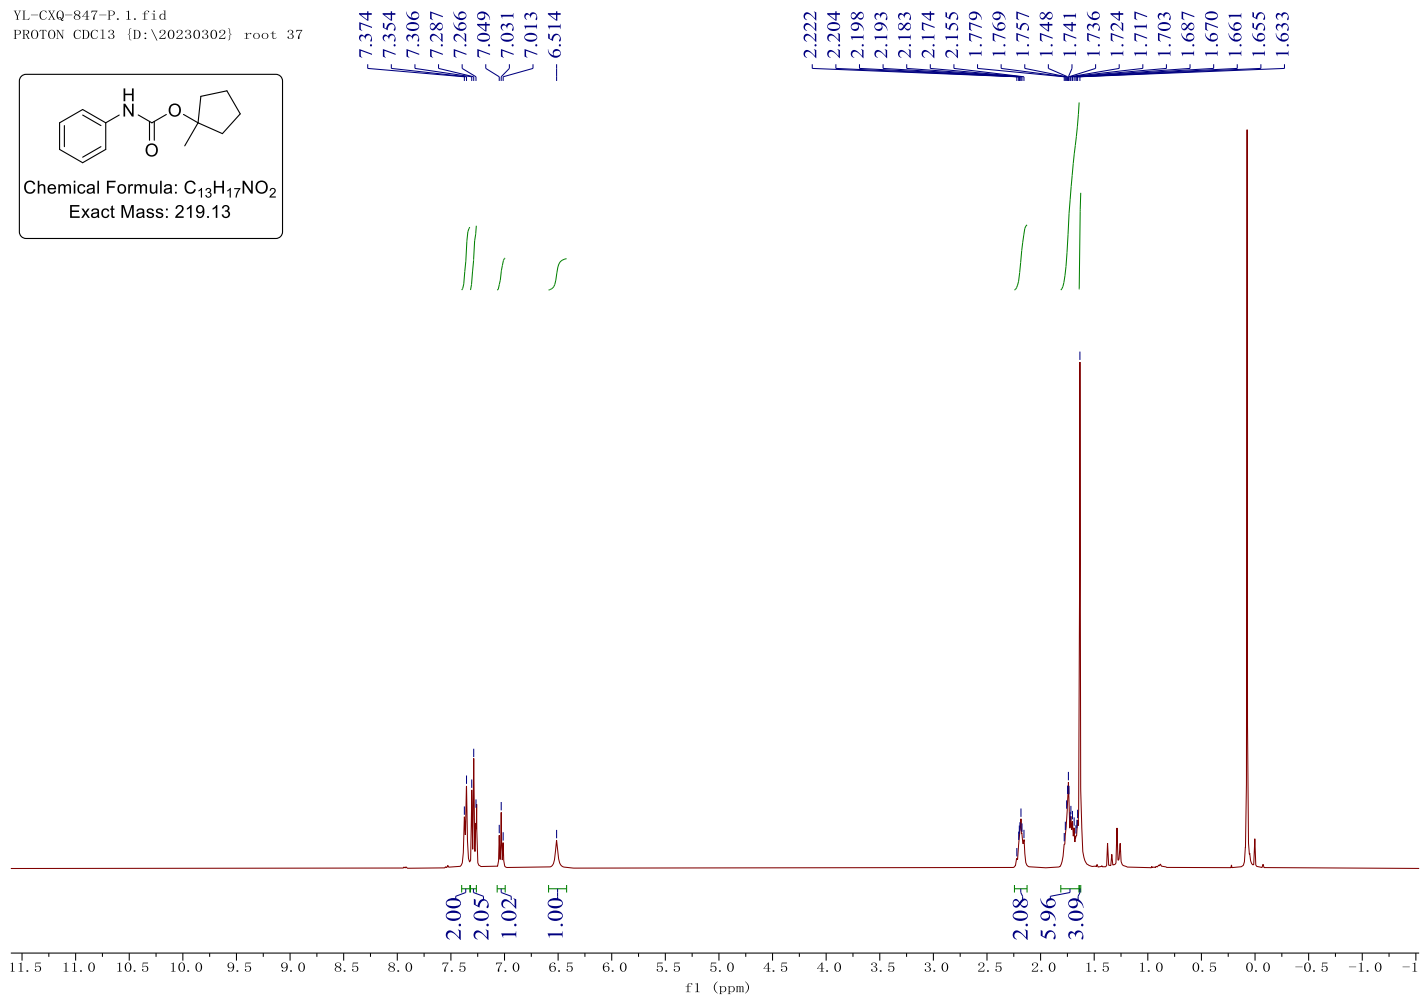

**$^{13}\text{C}\{^1\text{H}\}$  NMR (101 MHz, DMSO) spectrum of compound **3aq**.**

YL-ZXY-847. 1. fid  
C13CPD DMSO {D:\20231119} root 15

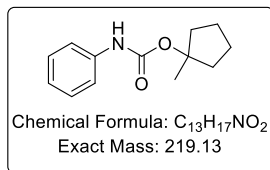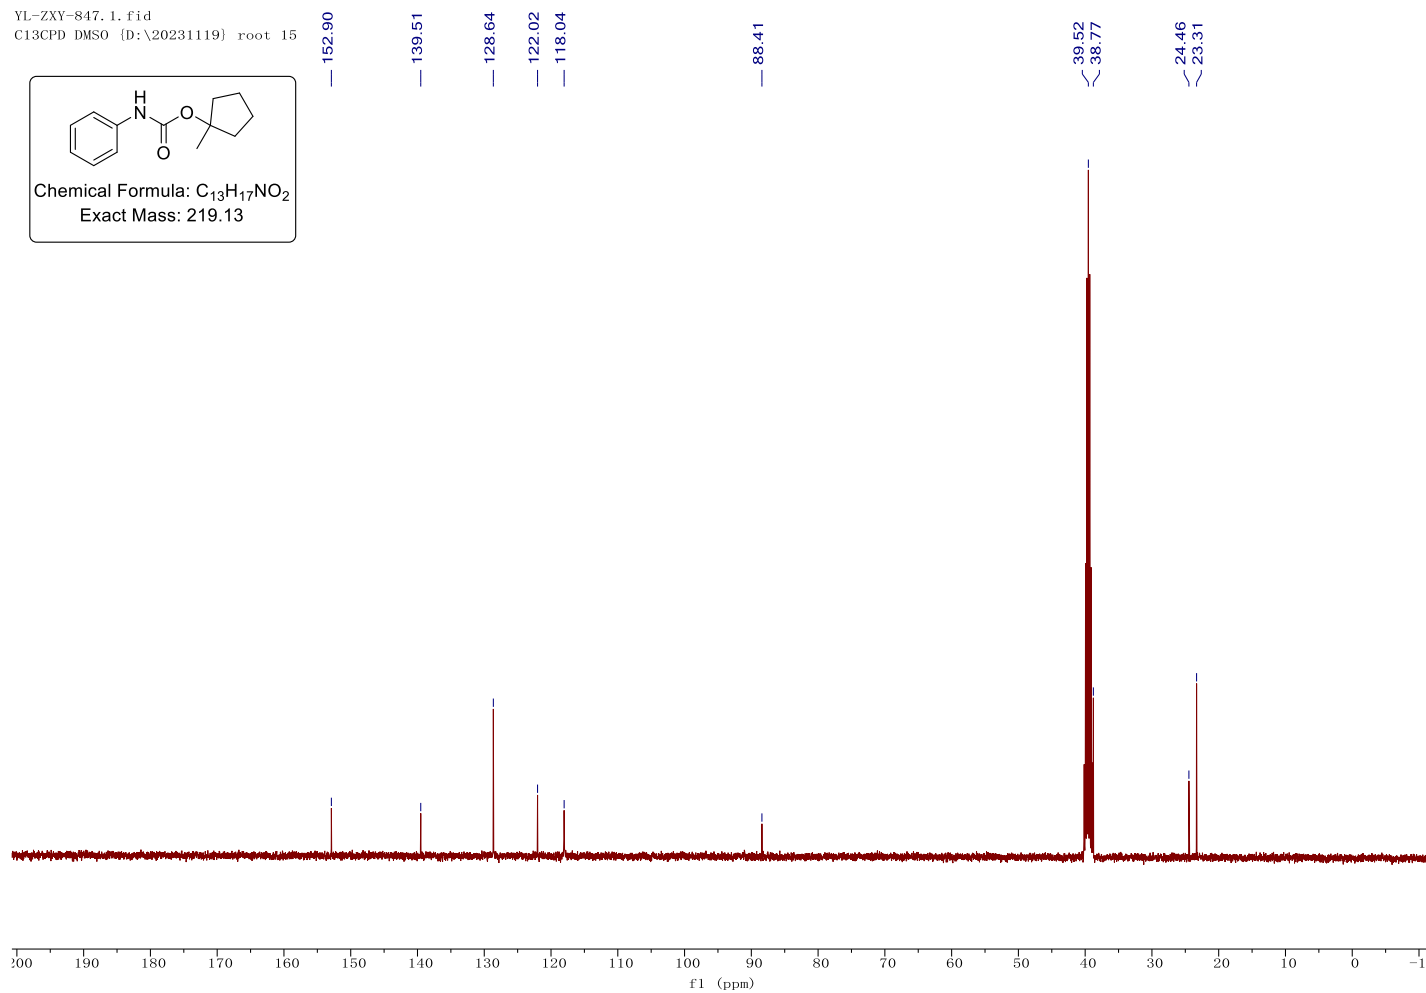

<sup>1</sup>H NMR (400 MHz, CDCl<sub>3</sub>) spectrum of compound **3ar**.

YL-CXQ-848-P.1.fid  
PROTON CDCl<sub>3</sub> [D:\20230302] root 38

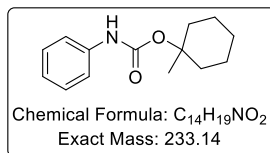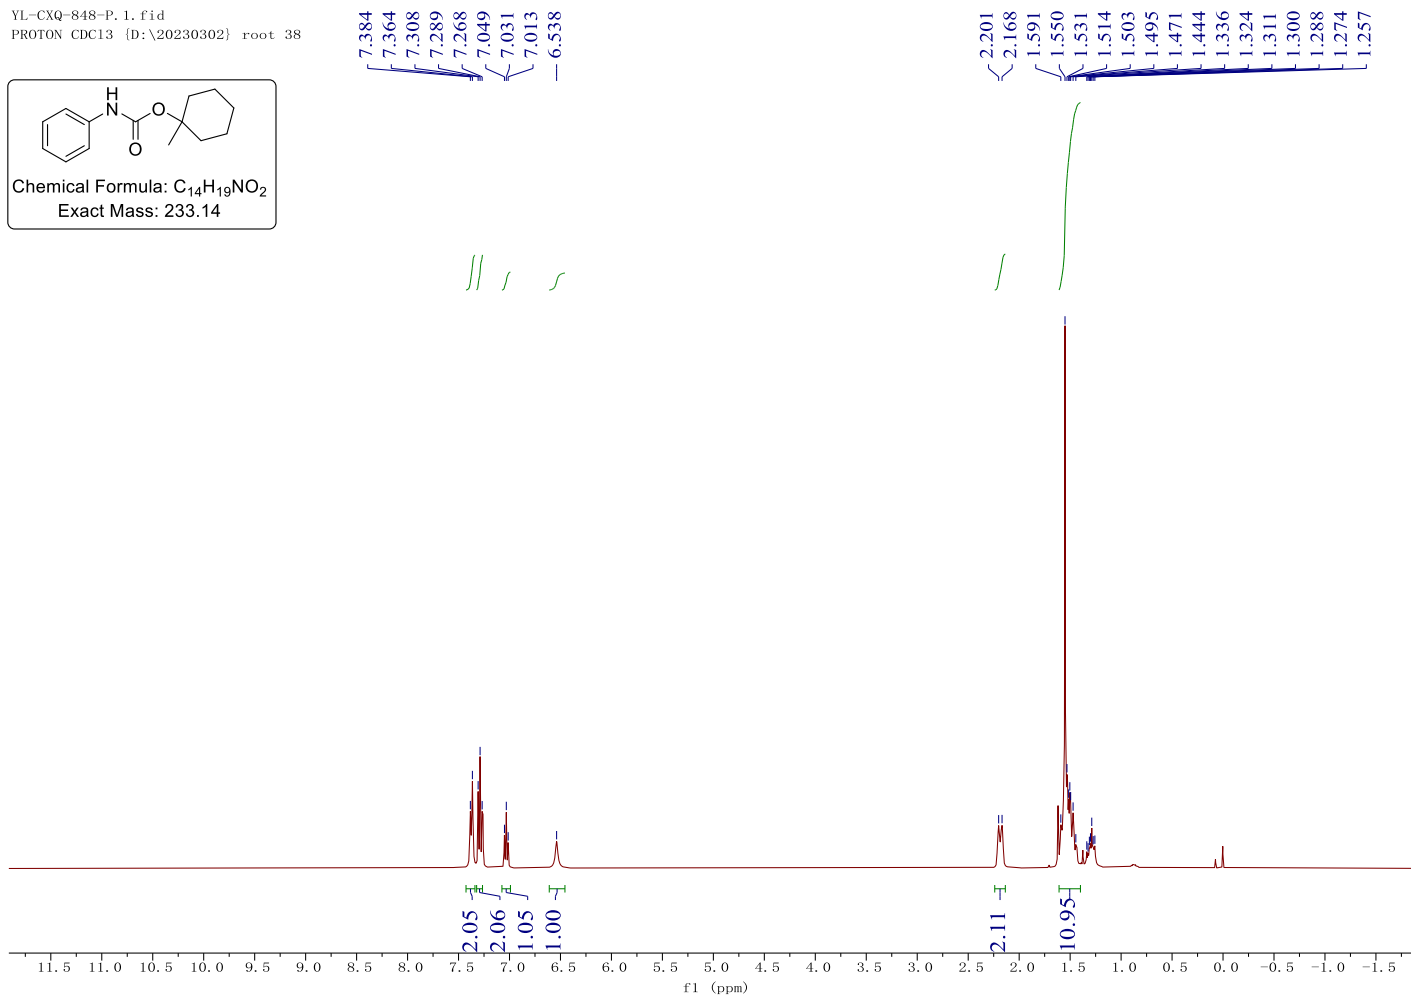

**$^{13}\text{C}\{^1\text{H}\}$  NMR (101 MHz,  $\text{CDCl}_3$ ) spectrum of compound **3ar**.**

YL-CXQ-848-P. 2. fid  
C13CPD CDC13 (D:\20230302) root 38

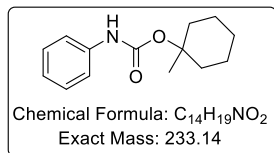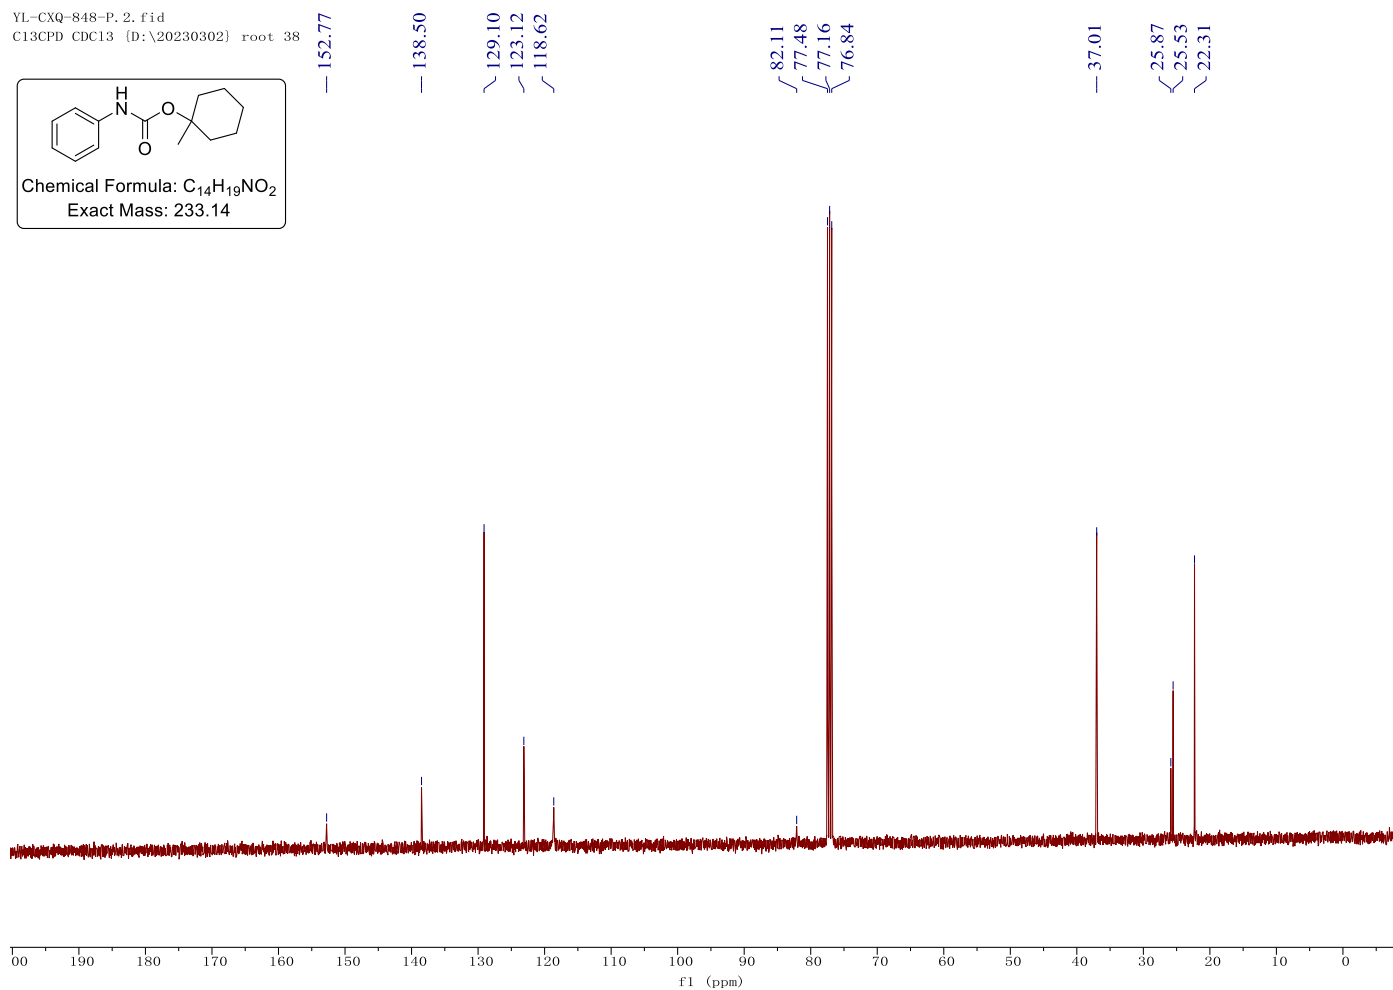



# <sup>1</sup>H NMR (400 MHz, CDCl<sub>3</sub>) spectrum of compound **3as**.

YL-CXQ-849-P. 1. fid  
PROTON CDCl3 [D:\20230302] root 39

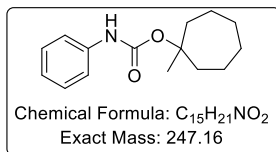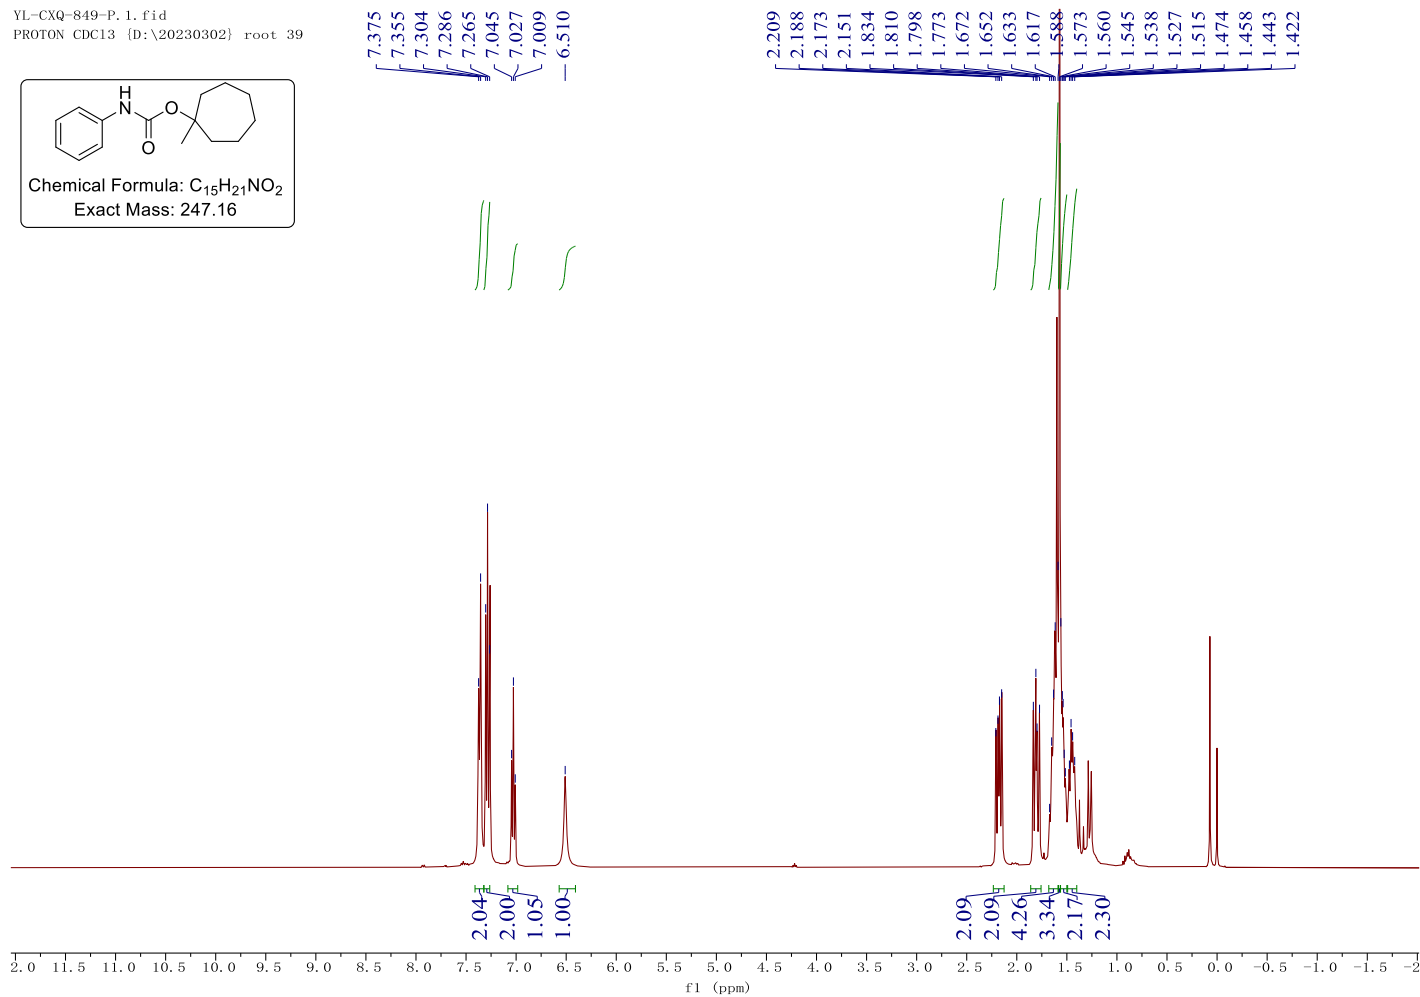

**$^{13}\text{C}\{^1\text{H}\}$  NMR (101 MHz,  $\text{CDCl}_3$ ) spectrum of compound **3as**.**

YL-CXQ-849-P. 2. fid  
C13CPD CDC13 (D:\20230302) root 39

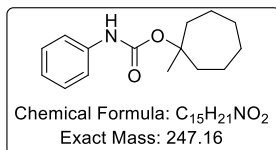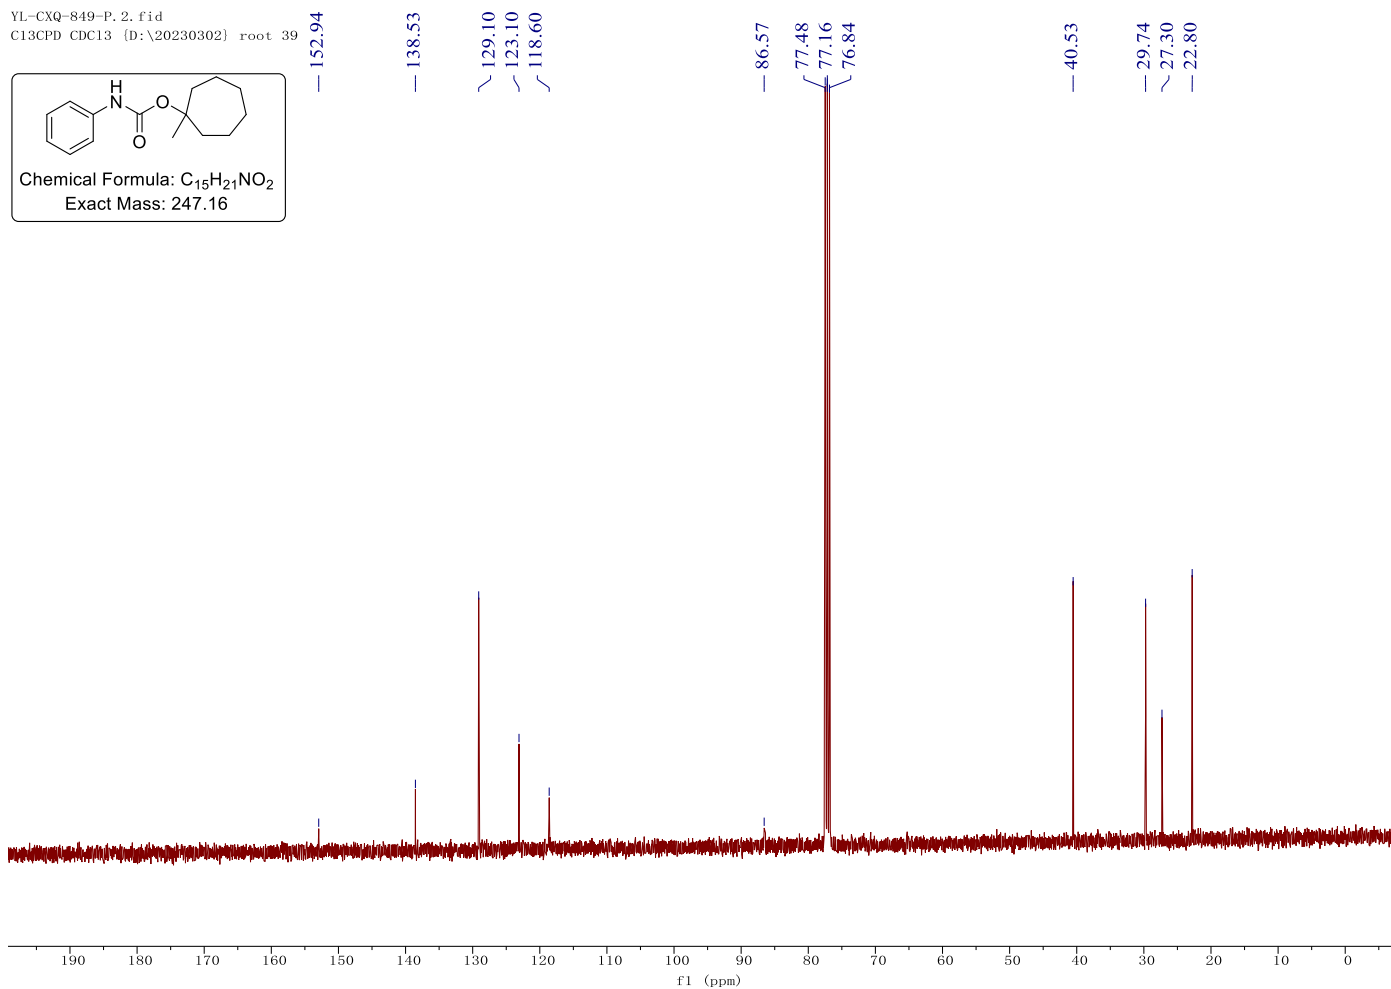

<sup>1</sup>H NMR (400 MHz, CDCl<sub>3</sub>) spectrum of compound **3at**.

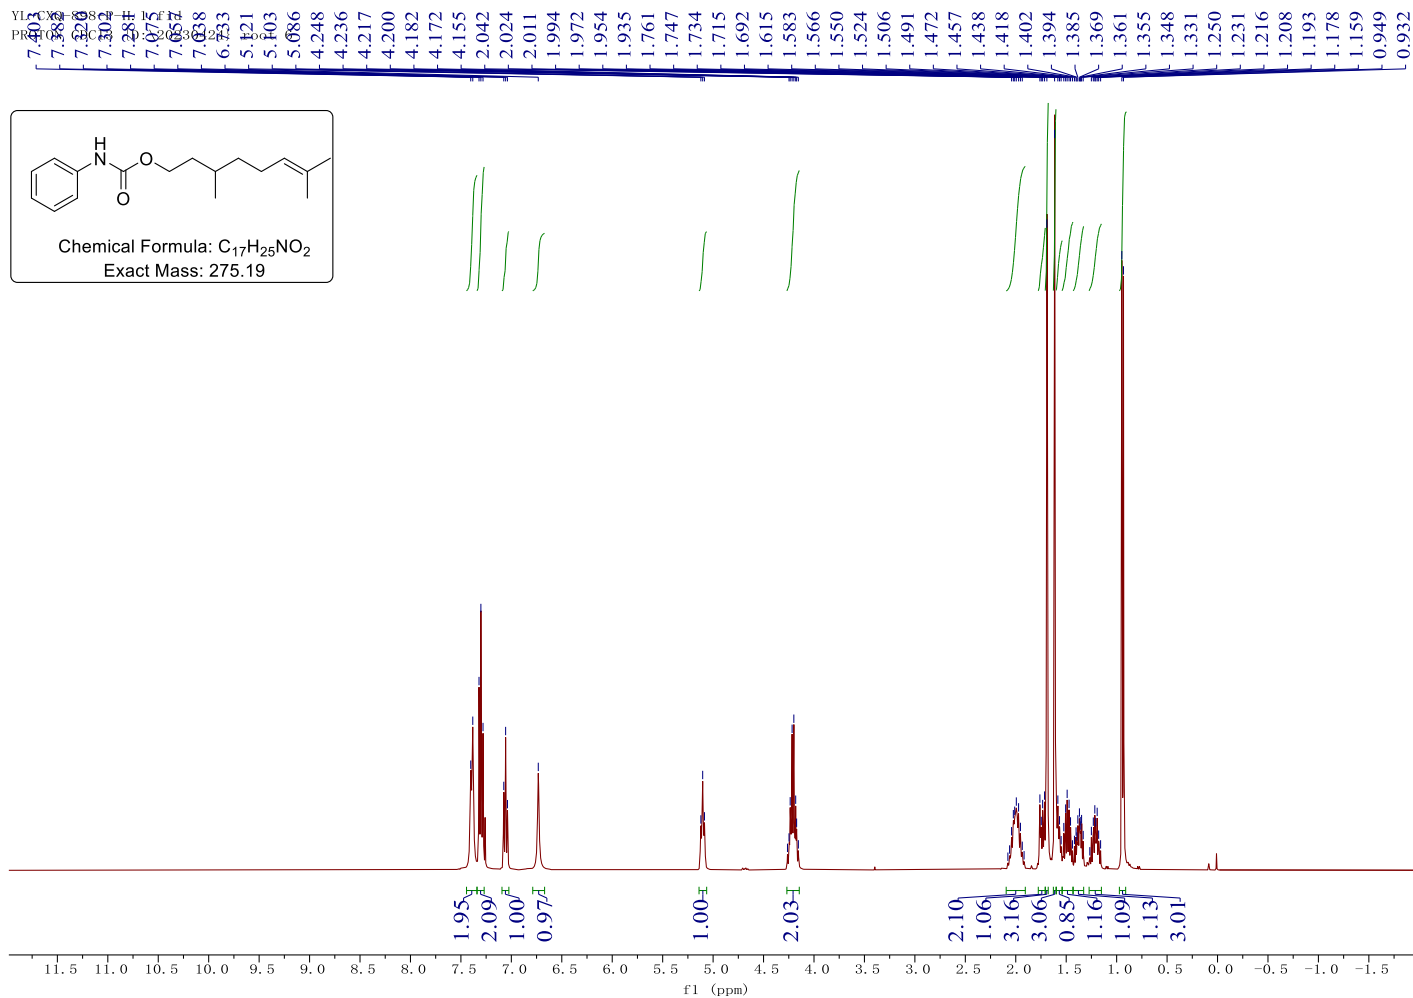

**$^{13}\text{C}\{^1\text{H}\}$  NMR (101 MHz,  $\text{CDCl}_3$ ) spectrum of compound **3at**.**

YL-ZJY-898. 2. fid  
C13CPD CDC13 (D:\20231010) root 28

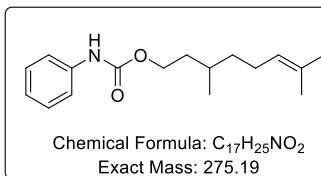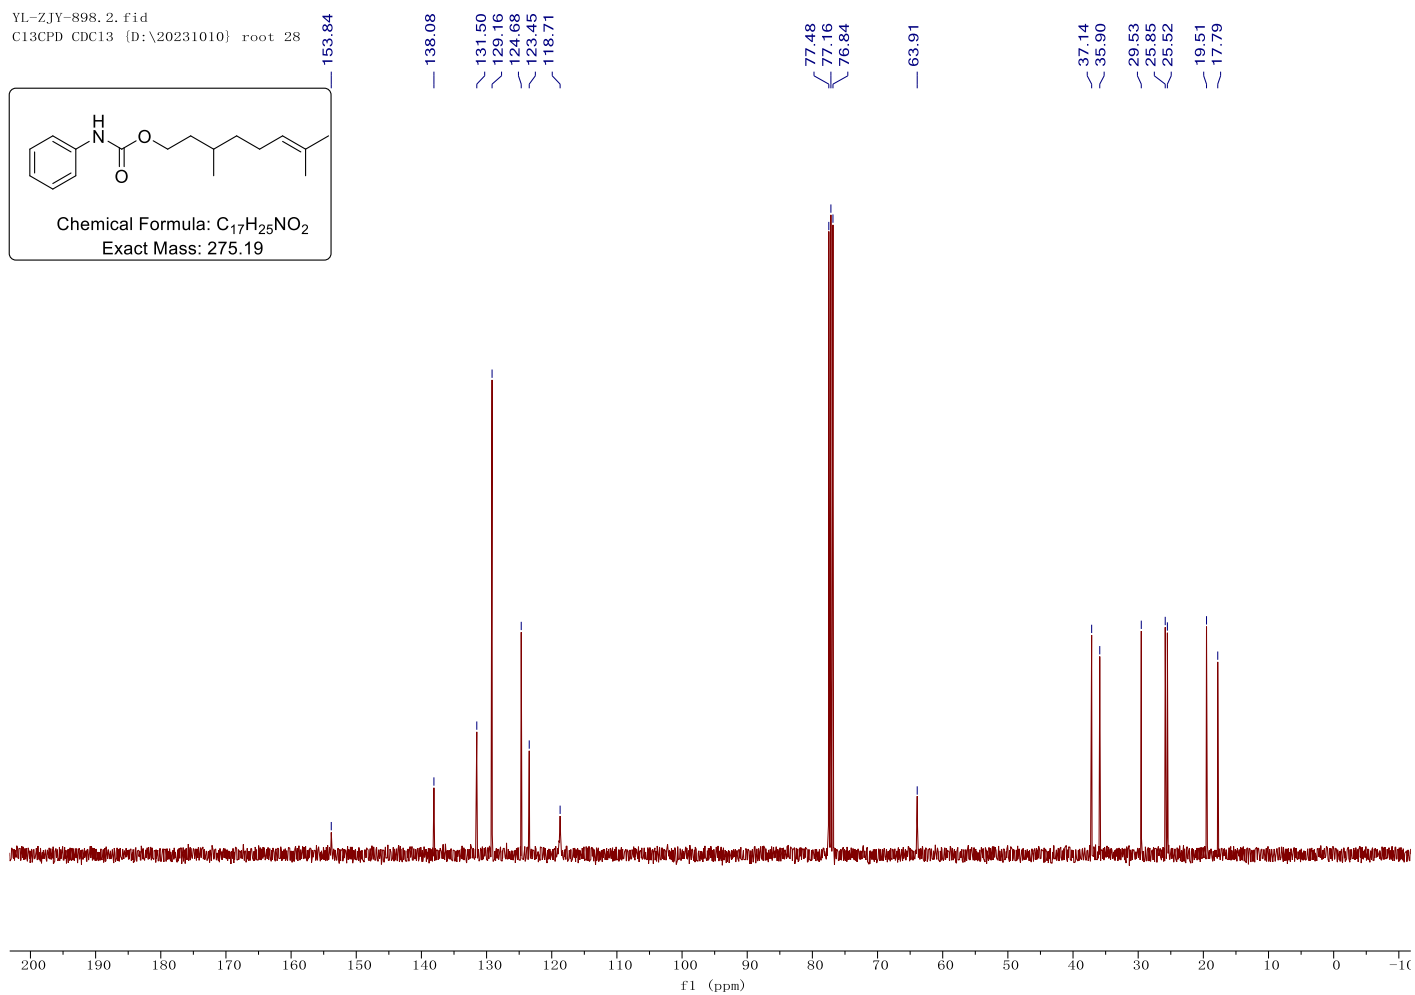

# <sup>1</sup>H NMR (400 MHz, CDCl<sub>3</sub>) spectrum of compound 3au.

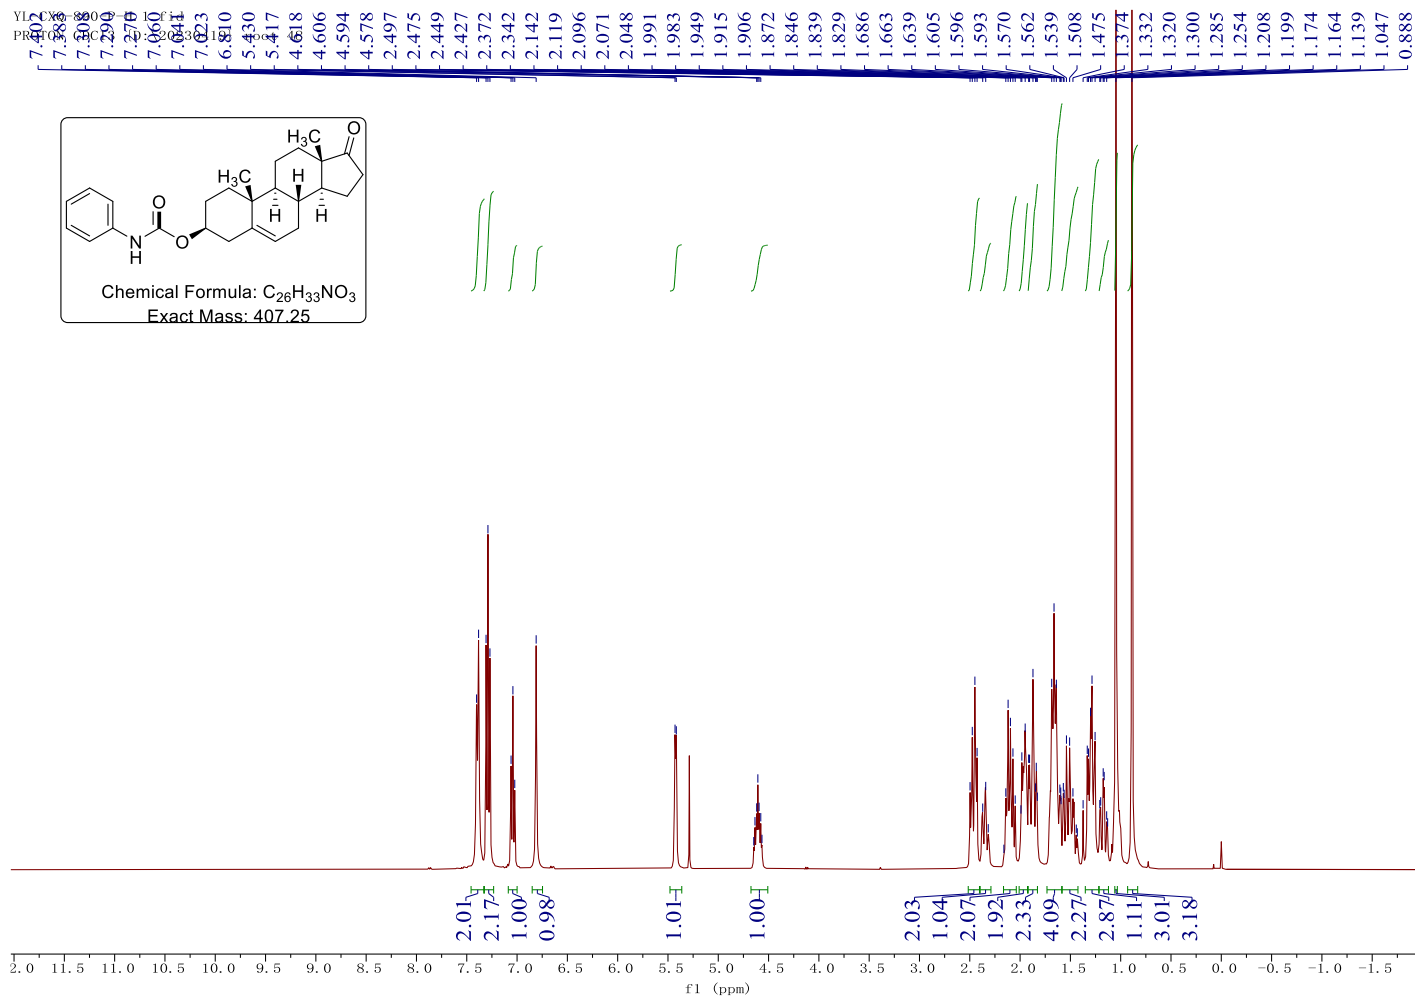

# $^{13}\text{C}\{^1\text{H}\}$ NMR (101 MHz, $\text{CDCl}_3$ ) spectrum of compound **3au**.

YL-CX-890.1.fid  
C13CPD CDC13 (D:\20231127) root 10

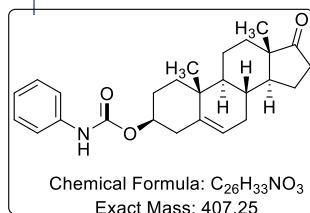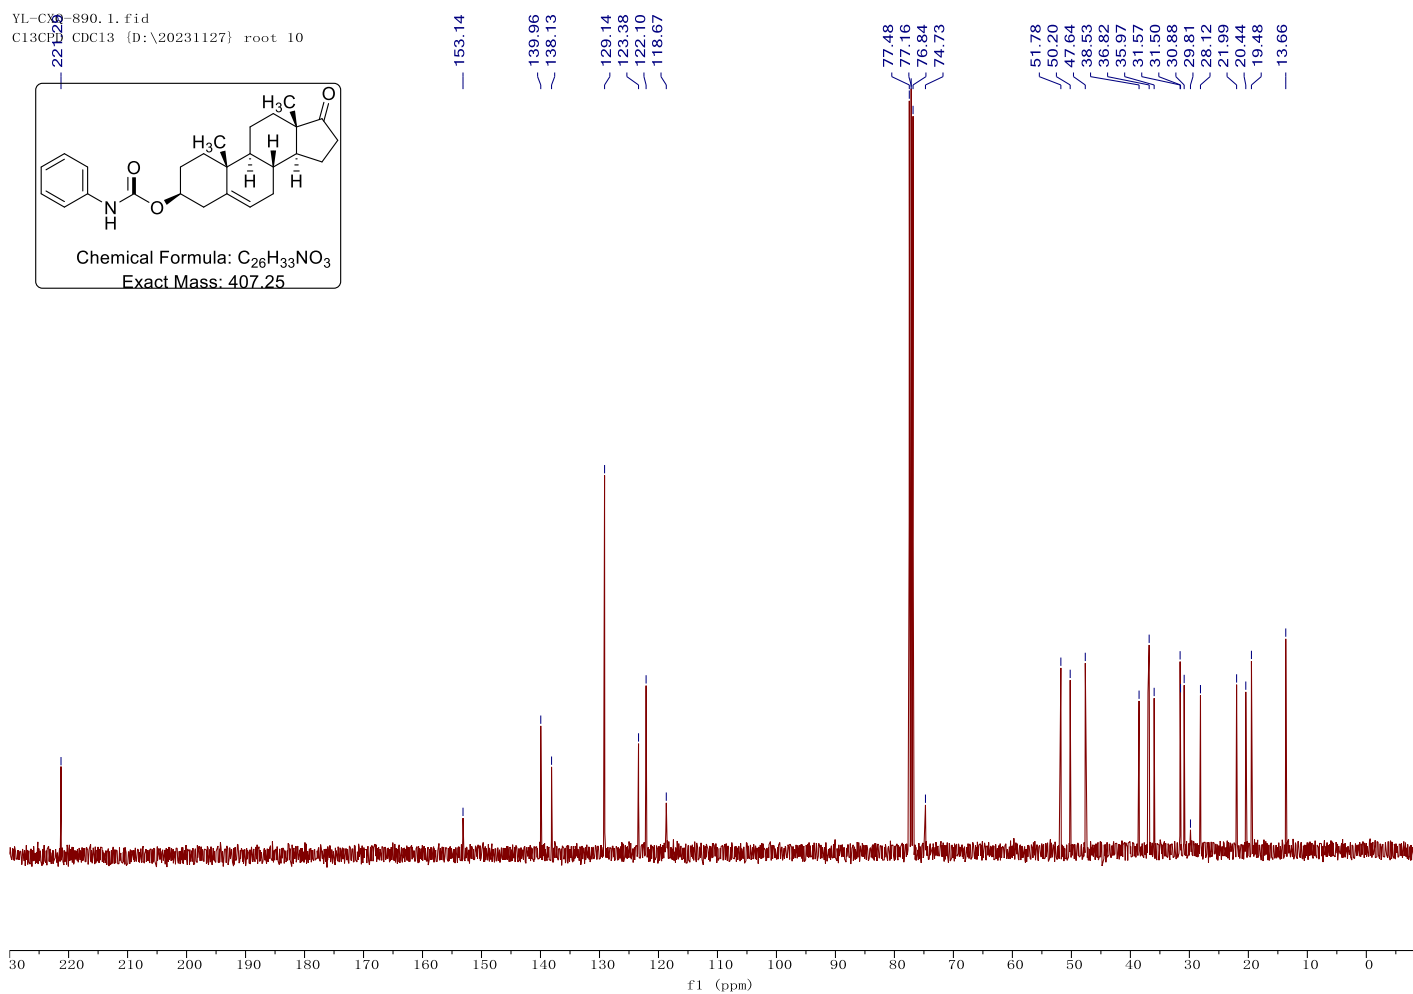

<sup>1</sup>H NMR (400 MHz, CDCl<sub>3</sub>) spectrum of compound **3av**.

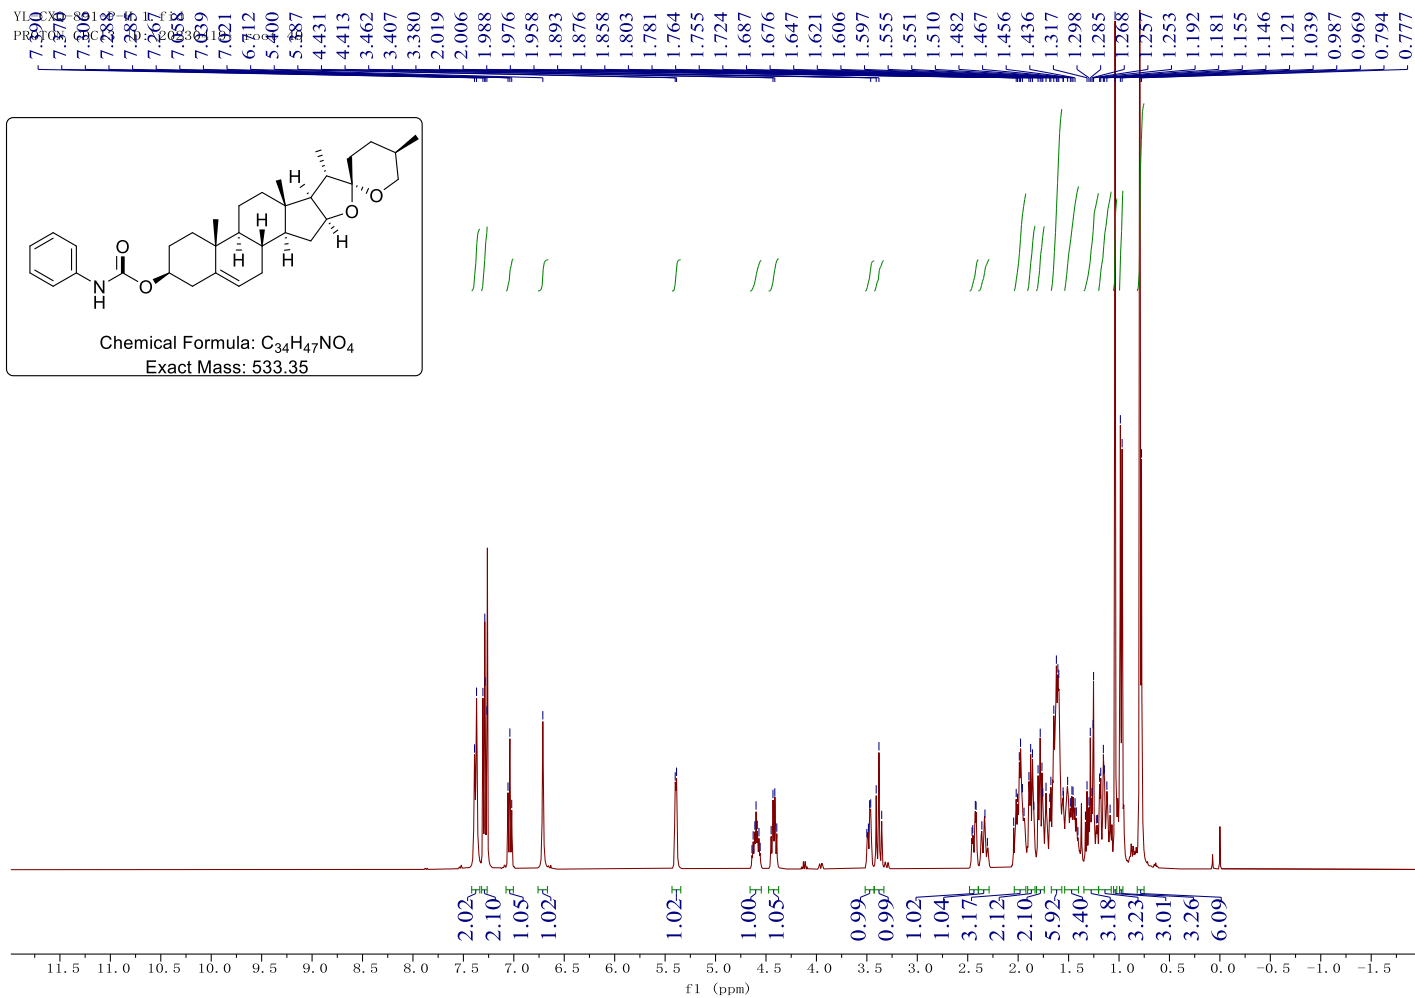

# $^{13}\text{C}\{^1\text{H}\}$ NMR (101 MHz, $\text{CDCl}_3$ ) spectrum of compound **3av**.

YL-ZXY-119-C. 1. fid  
C13CPD CDC13 {D:\20231227} root 16

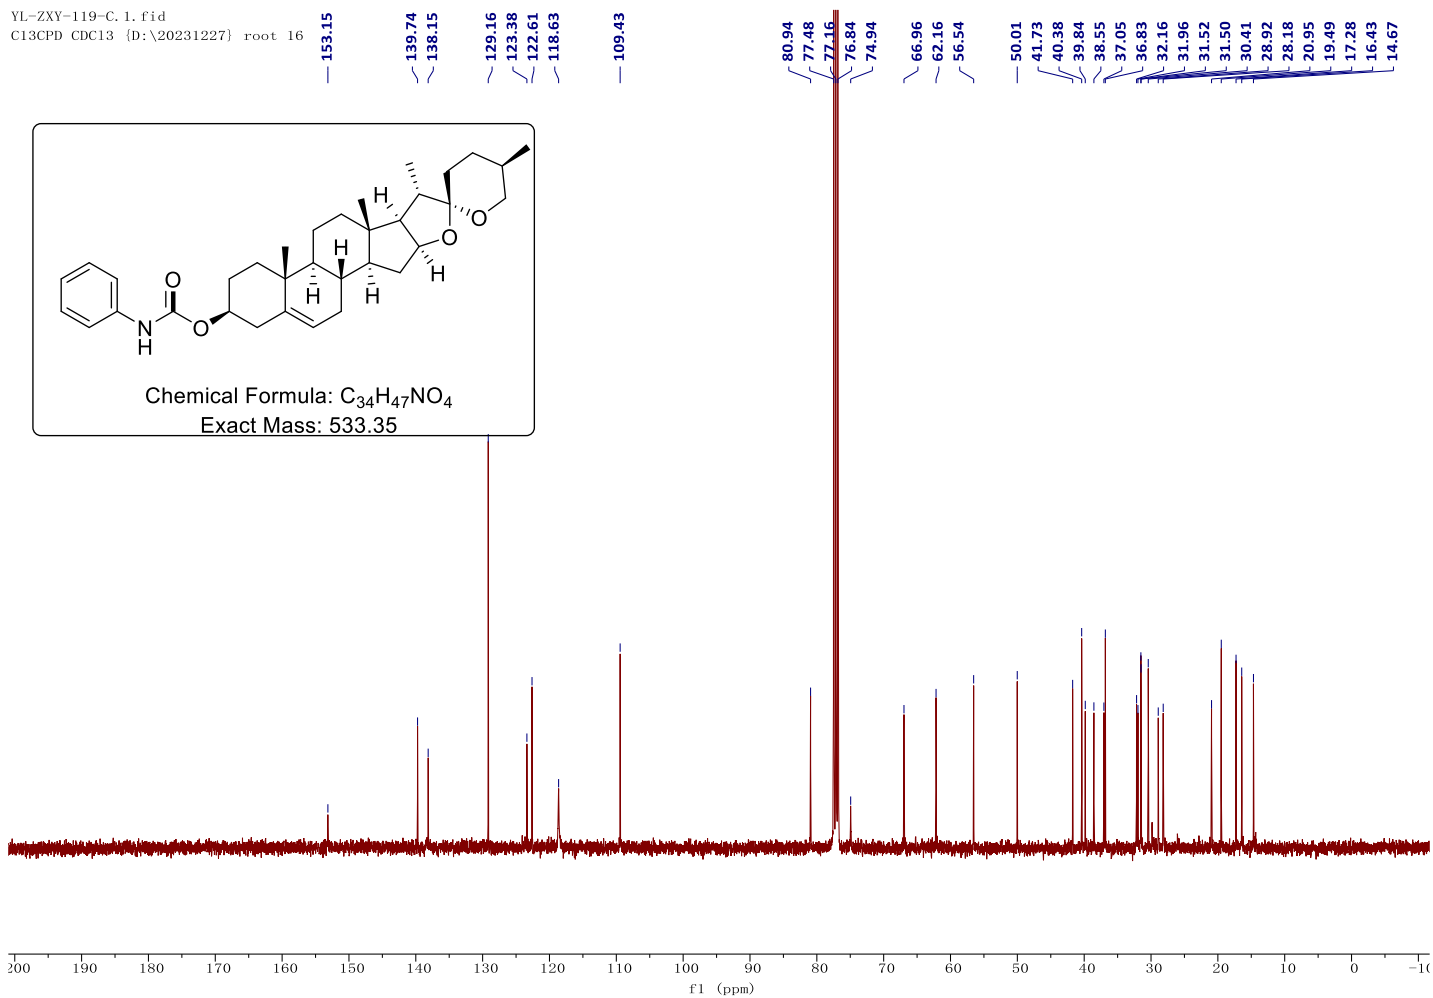



# <sup>1</sup>H NMR (400 MHz, CDCl<sub>3</sub>) spectrum of compound **3aw**.

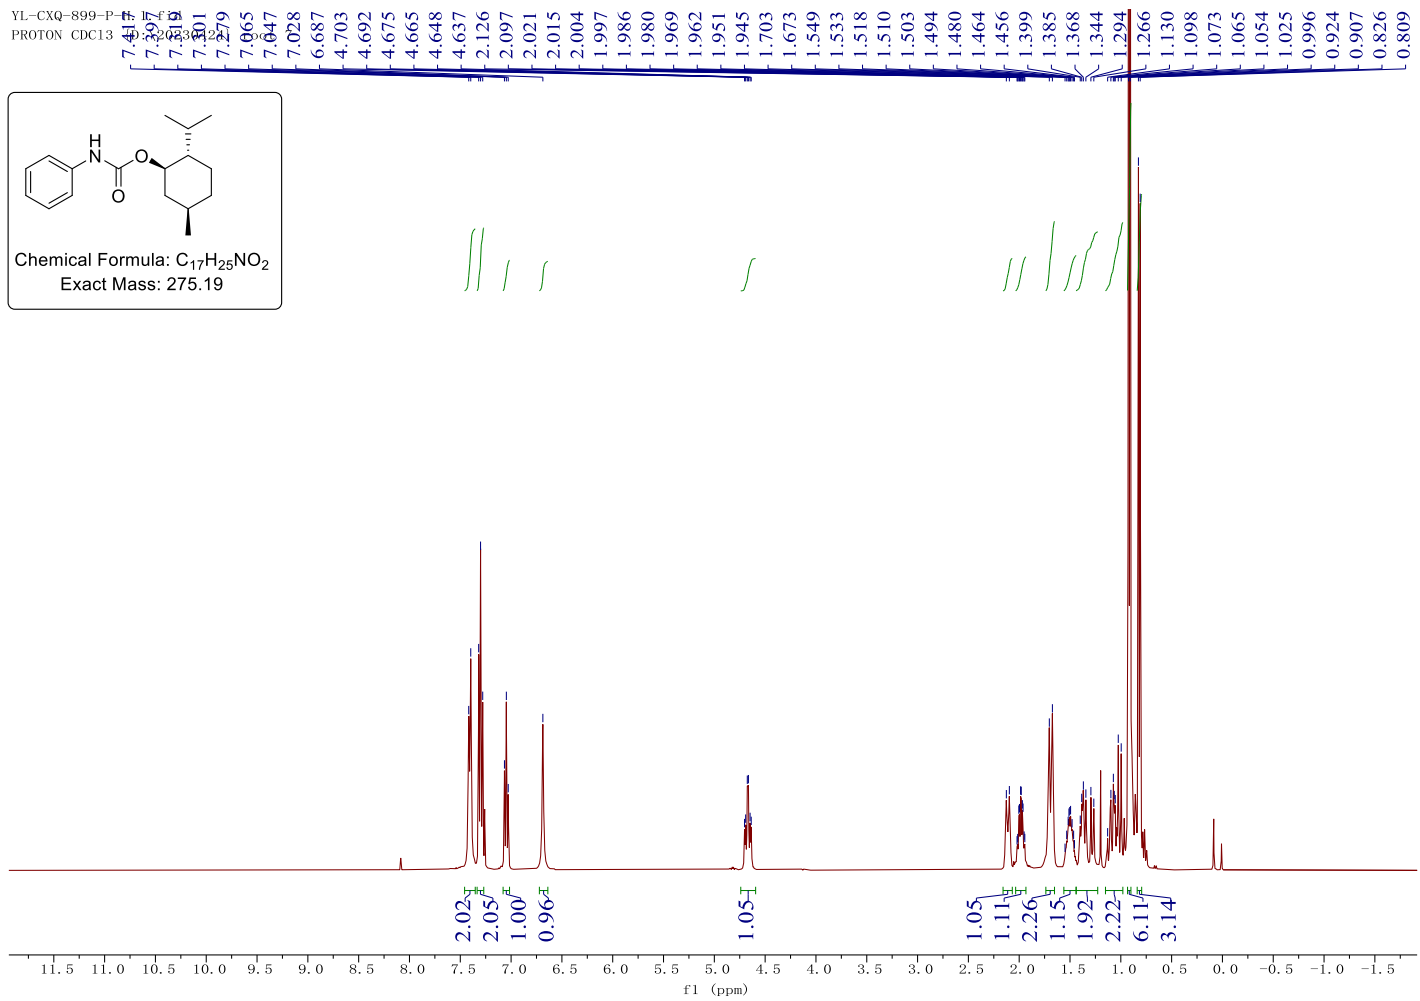

**$^{13}\text{C}\{^1\text{H}\}$  NMR (101 MHz,  $\text{CDCl}_3$ ) spectrum of compound **3aw**.**

YL-CXQ-899  
C13CPD CDC13 {D:\20230705} root 21

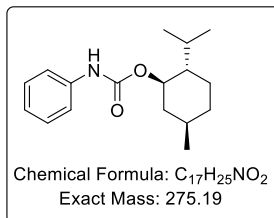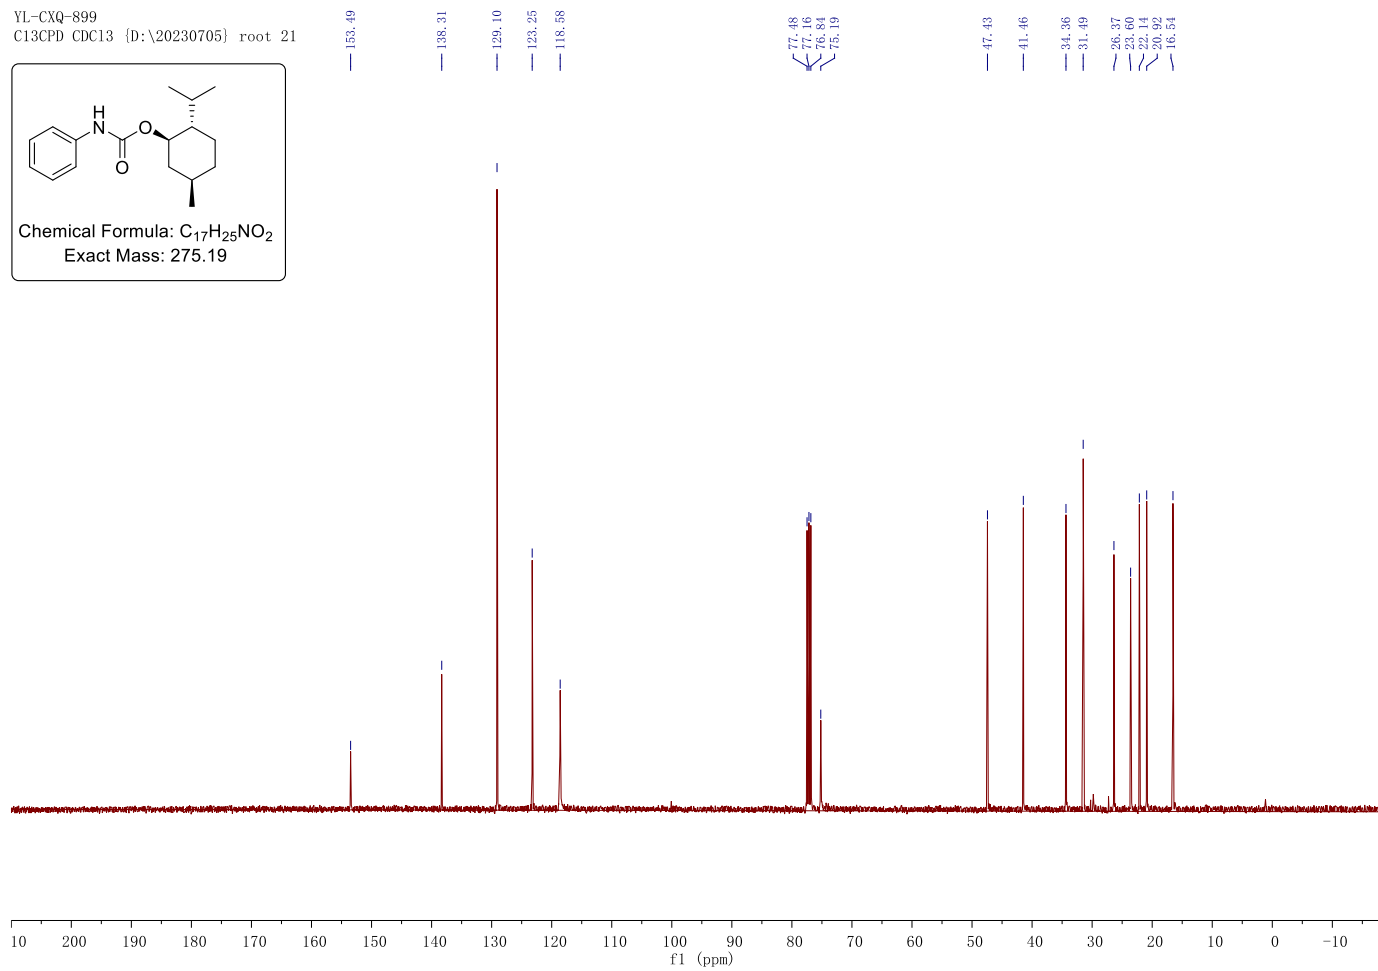

# <sup>1</sup>H NMR (400 MHz, CDCl<sub>3</sub>) spectrum of compound **5ab**.

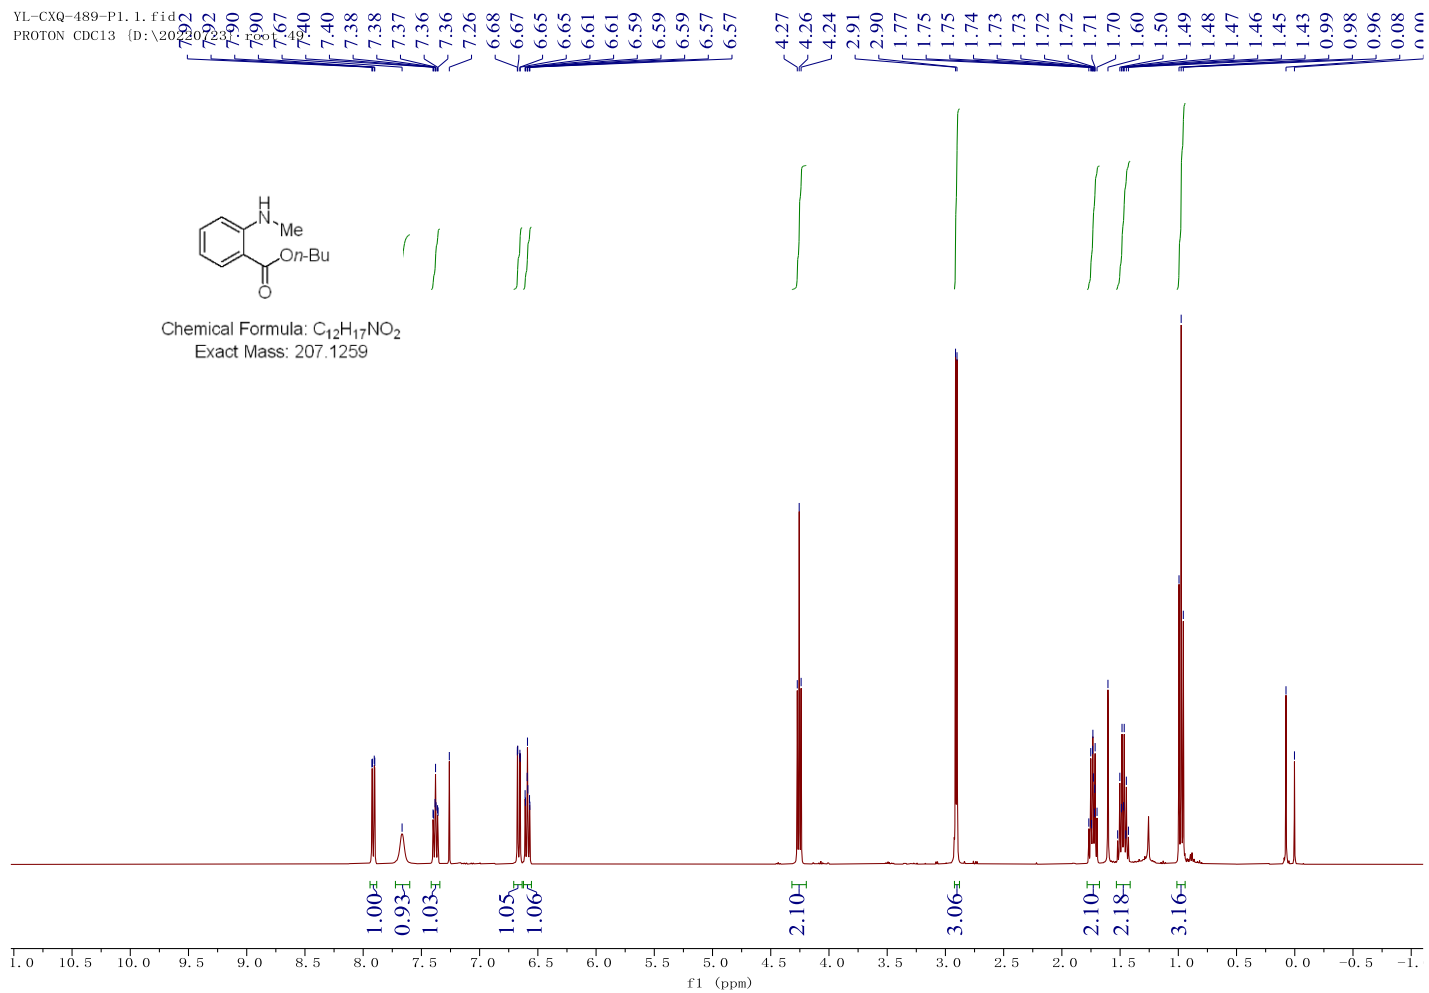

**$^{13}\text{C}\{^1\text{H}\}$  NMR (101 MHz,  $\text{CDCl}_3$ ) spectrum of compound **5ab**.**

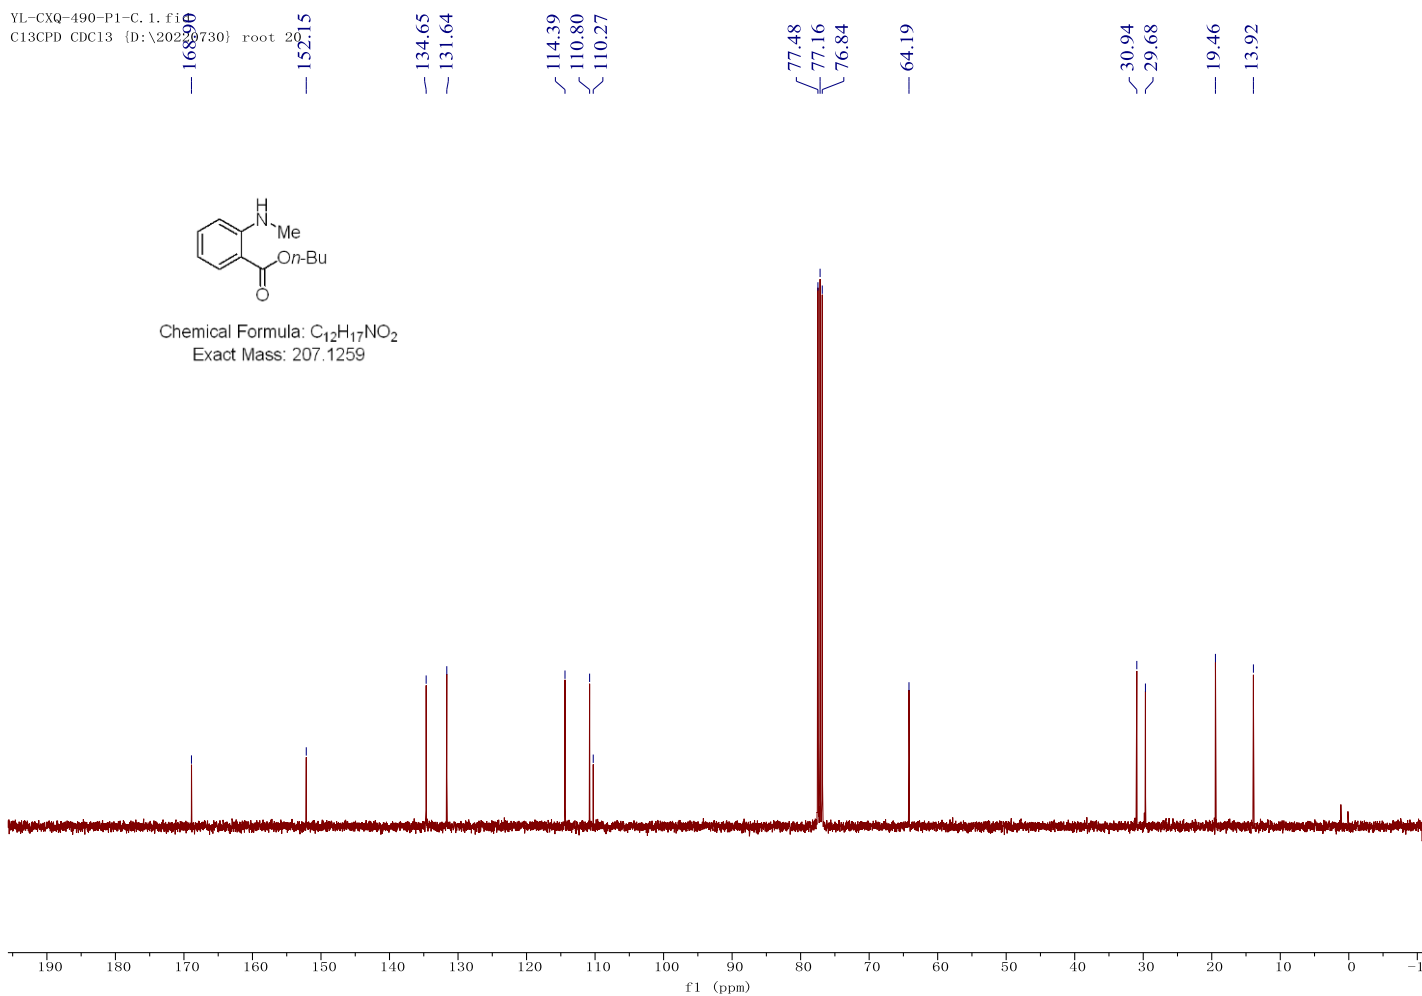

# <sup>1</sup>H NMR (400 MHz, CDCl<sub>3</sub>) spectrum of compound **5bb**.

YL-CXQ-459.1.fid  
PROTON CDC13 (D:\20211230

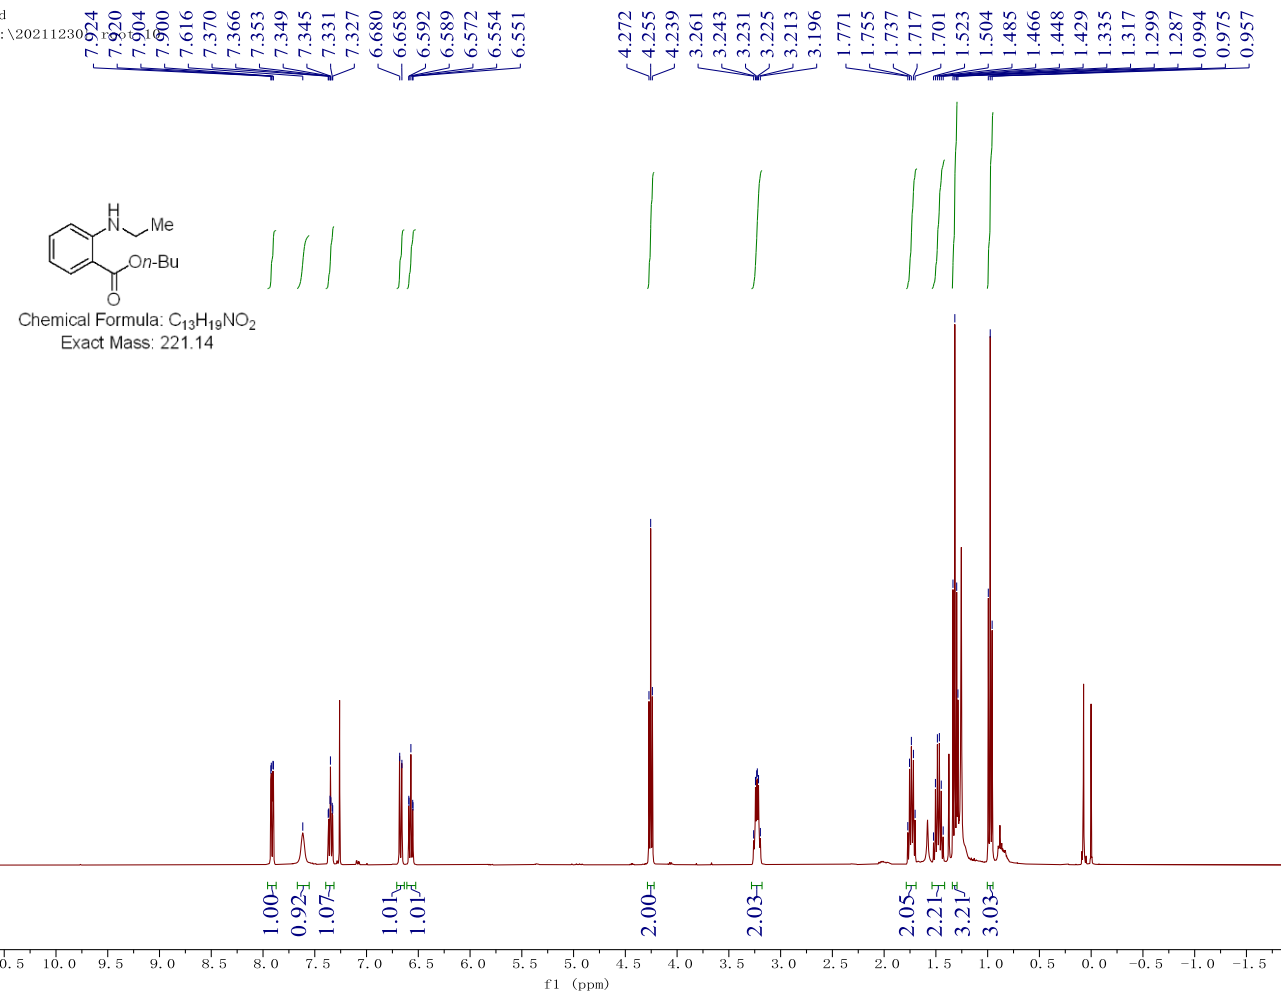

# $^{13}\text{C}\{^1\text{H}\}$ NMR (101 MHz, DMSO) spectrum of compound **5bb**.

YL-WL-ET-DMSO. 1. fid  
C13CPD DMSO {D:\20231107

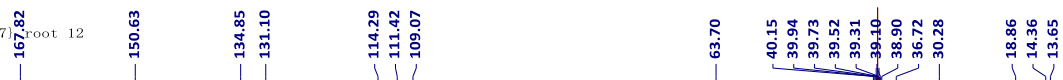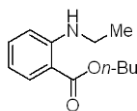

Chemical Formula:  $\text{C}_{13}\text{H}_{19}\text{NO}_2$   
Exact Mass: 221.14

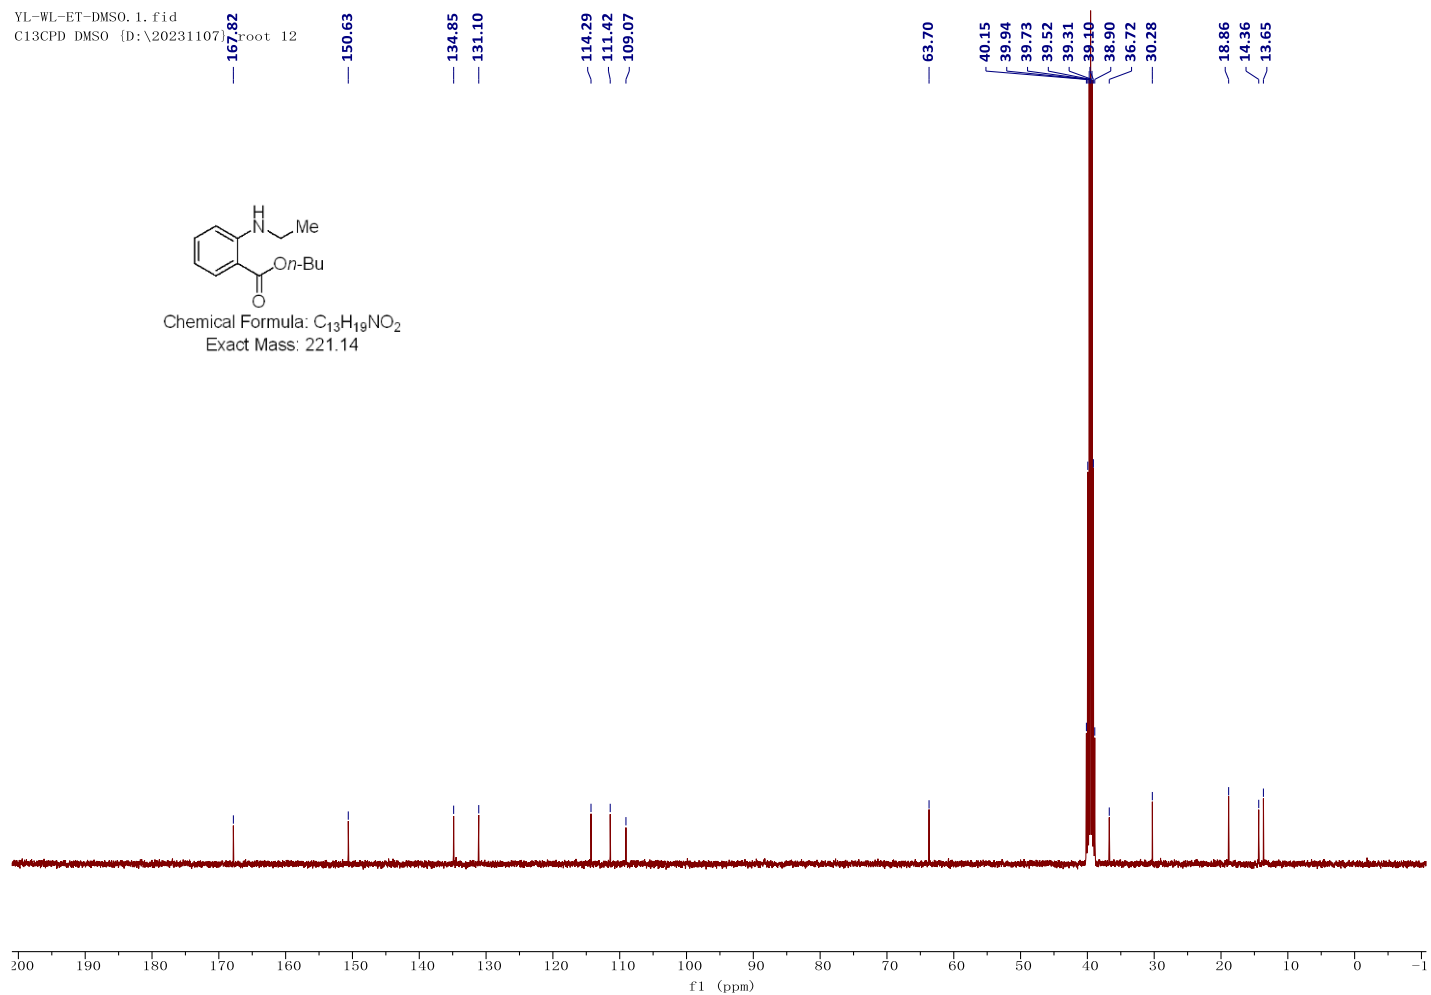

# <sup>1</sup>H NMR (400 MHz, CDCl<sub>3</sub>) spectrum of compound 5cb.

YL-CXQ-461.1.fid  
PROTON CDC13 (D:\20211230) root 11

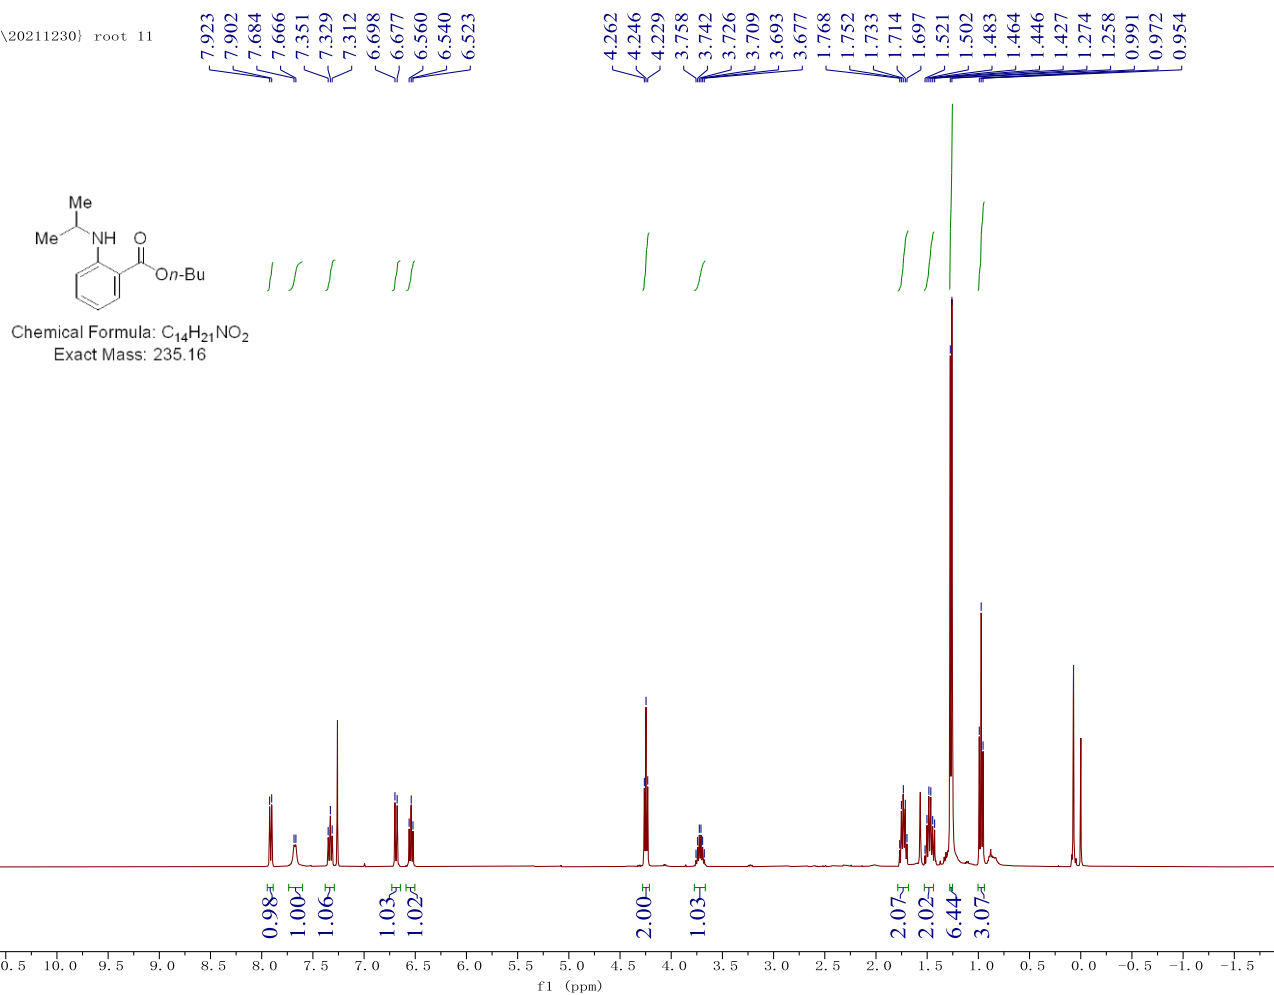

# $^{13}\text{C}\{^1\text{H}\}$ NMR (101 MHz, DMSO) spectrum of compound **5cb**.

YL-WL-170-DMSO.1.1.1r  
C13CPD DMSO {D:\20231107

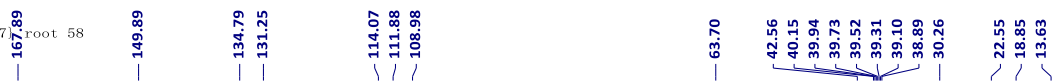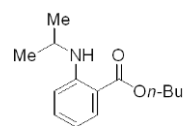

Chemical Formula:  $\text{C}_{14}\text{H}_{21}\text{NO}_2$   
Exact Mass: 235.16

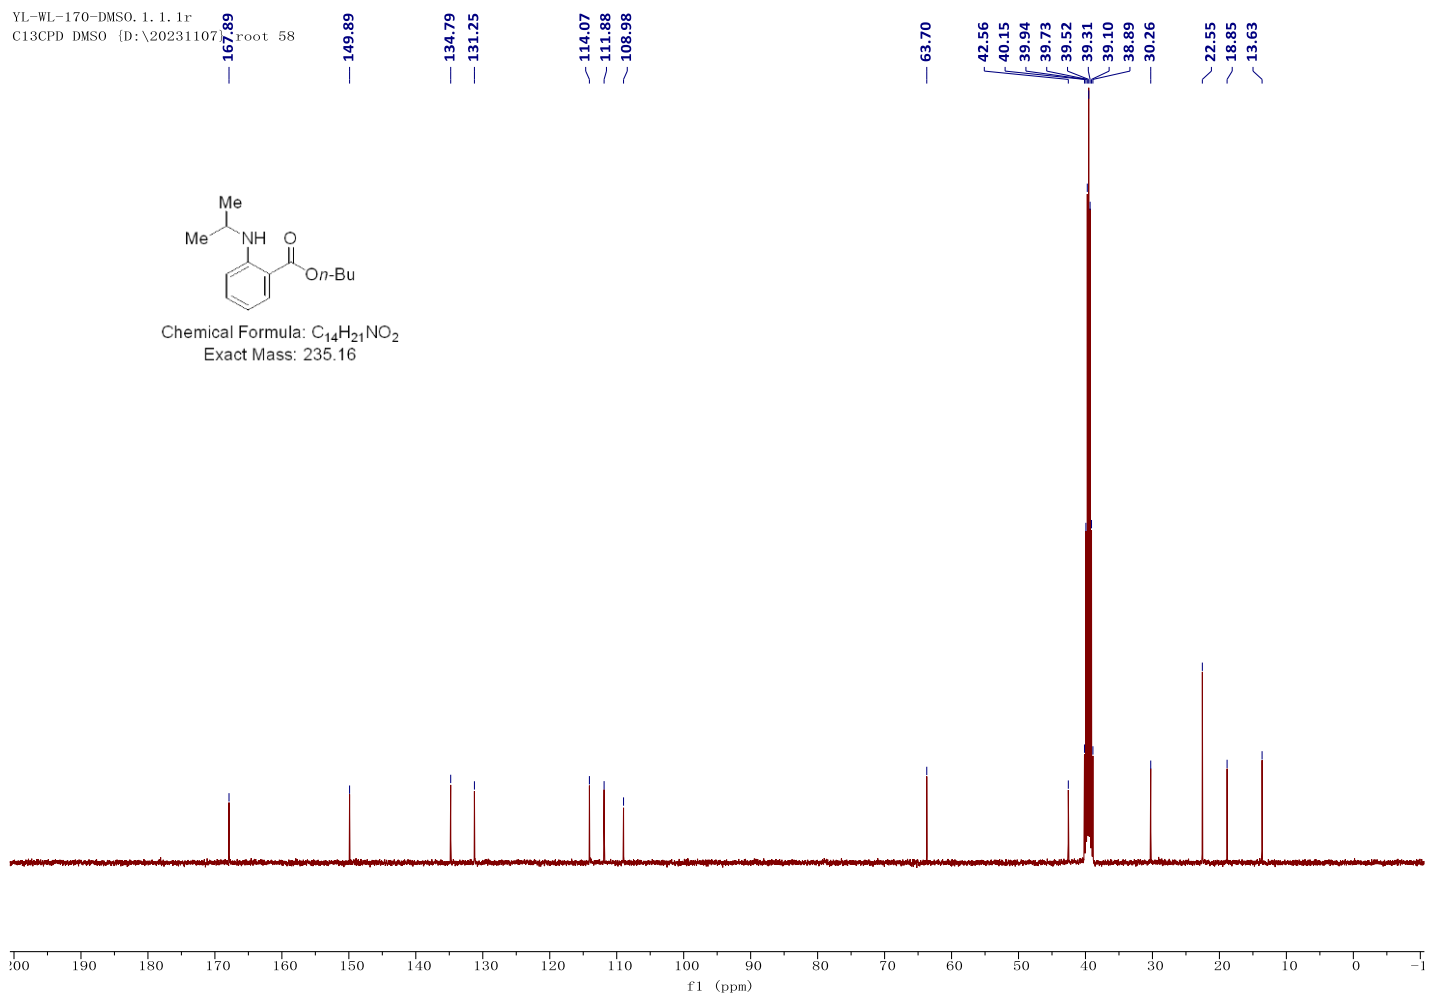



# <sup>1</sup>H NMR (400 MHz, CDCl<sub>3</sub>) spectrum of compound **5db**.

YL-CXQ-501-P1-H. 1. fid  
PROTON CDC13 (D:\20220730) root 31

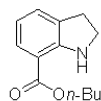

Chemical Formula: C<sub>13</sub>H<sub>17</sub>NO<sub>2</sub>  
Exact Mass: 219.13

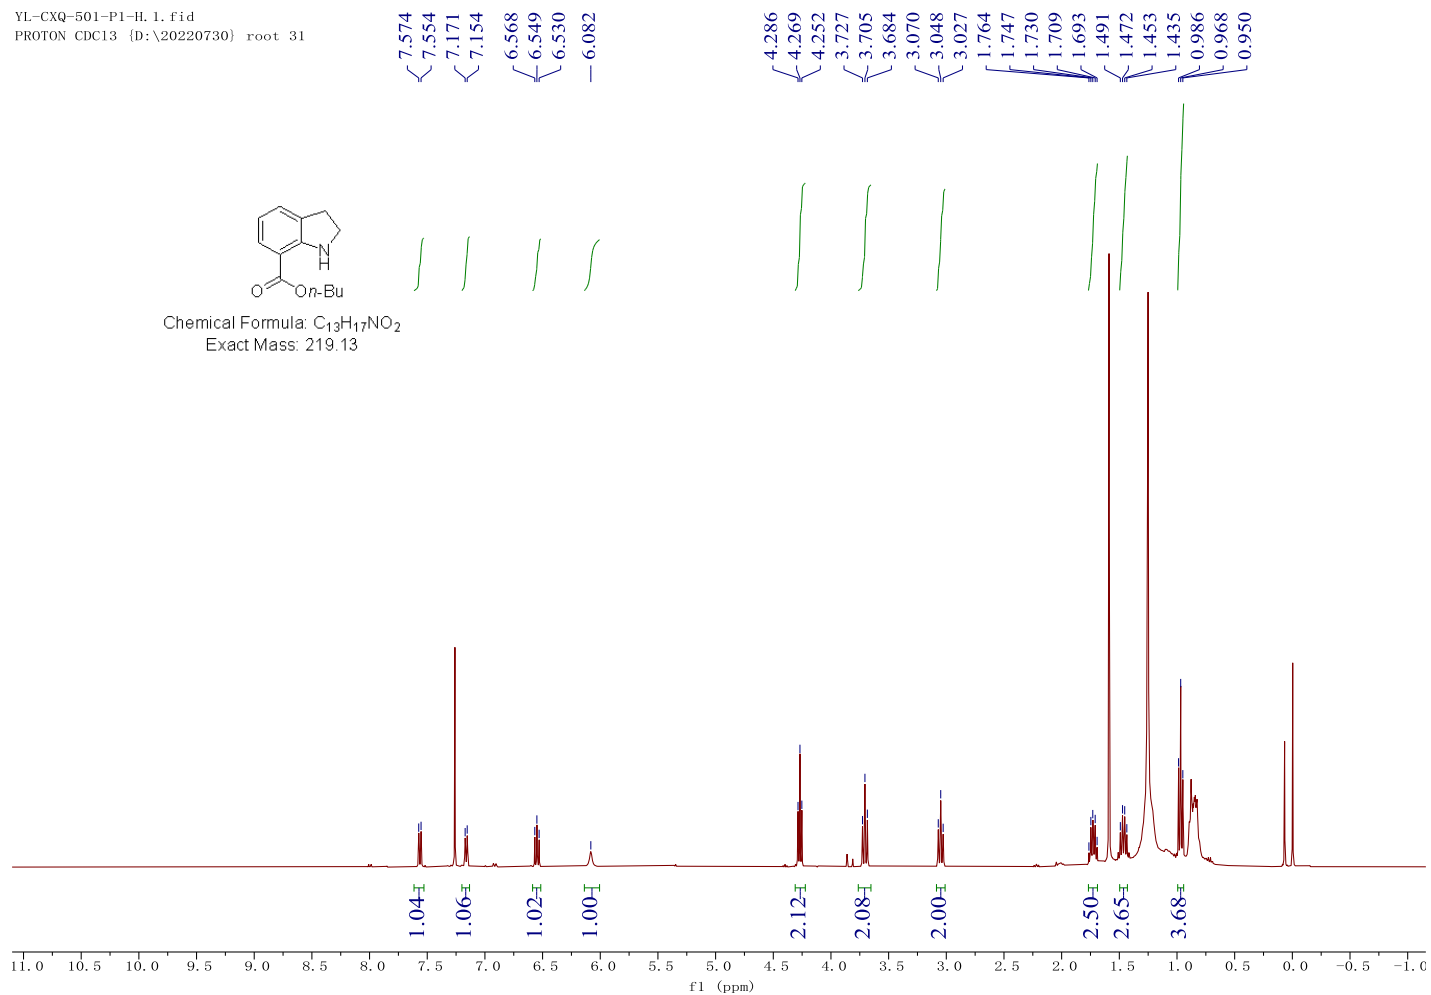

# $^{13}\text{C}\{^1\text{H}\}$ NMR (101 MHz, DMSO) spectrum of compound **5db**

YL-WL-172.1.fid  
C13CPD DMSO {D:\20231107} root 23

166.55

154.07

131.28

128.38

127.28

115.35

106.78

63.41

46.44

40.14

39.94

39.73

39.62

39.52

39.31

39.10

38.89

30.40

27.81

18.82

13.68

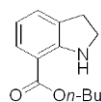

Chemical Formula:  $\text{C}_{13}\text{H}_{17}\text{NO}_2$   
Exact Mass: 219.13

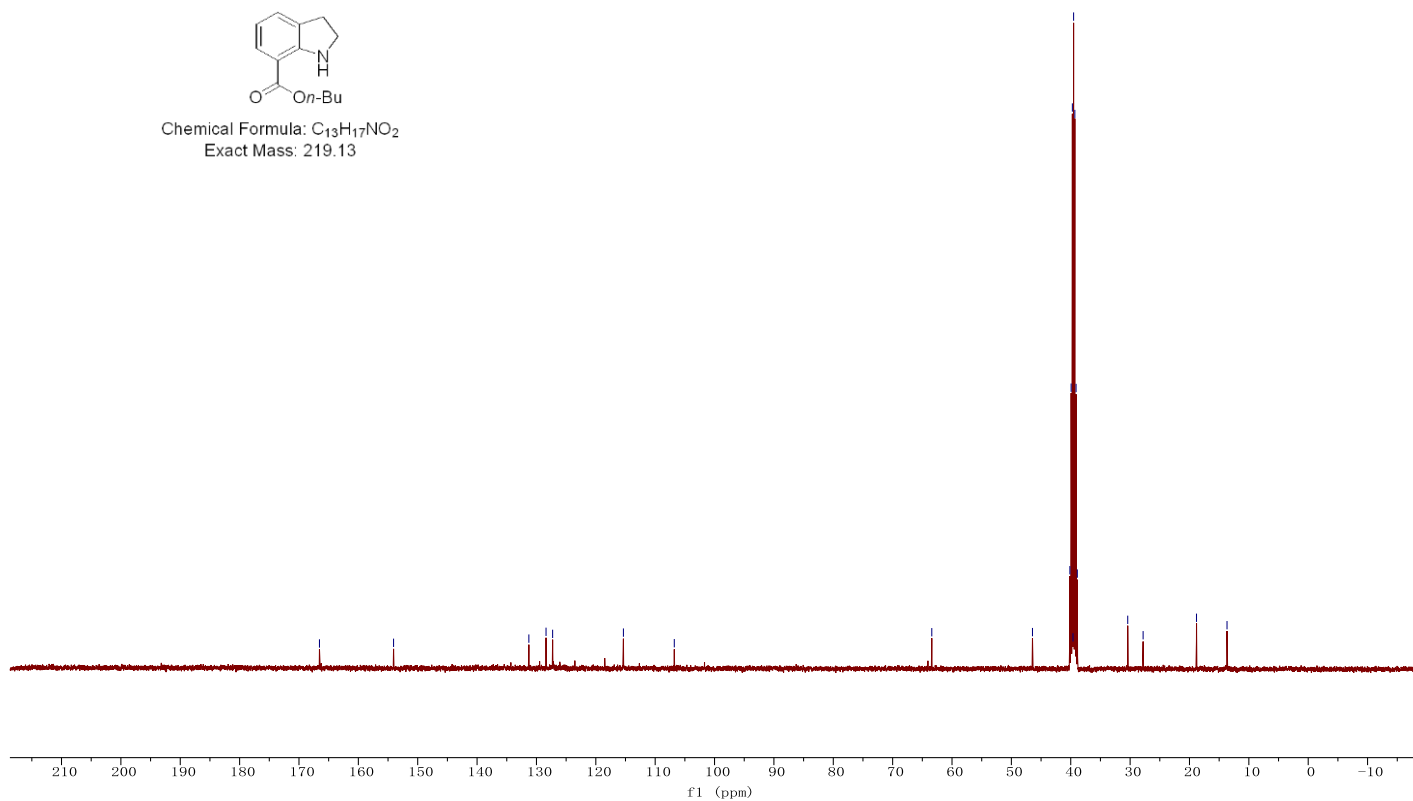

# <sup>1</sup>H NMR (400 MHz, CDCl<sub>3</sub>) spectrum of compound 5eb

YL-CXQ-502-P1-H. 1. fid  
PROTON CDC13 (D:\20220730) root 32

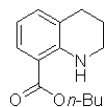

Chemical Formula: C<sub>14</sub>H<sub>19</sub>NO<sub>2</sub>  
Exact Mass: 233.14

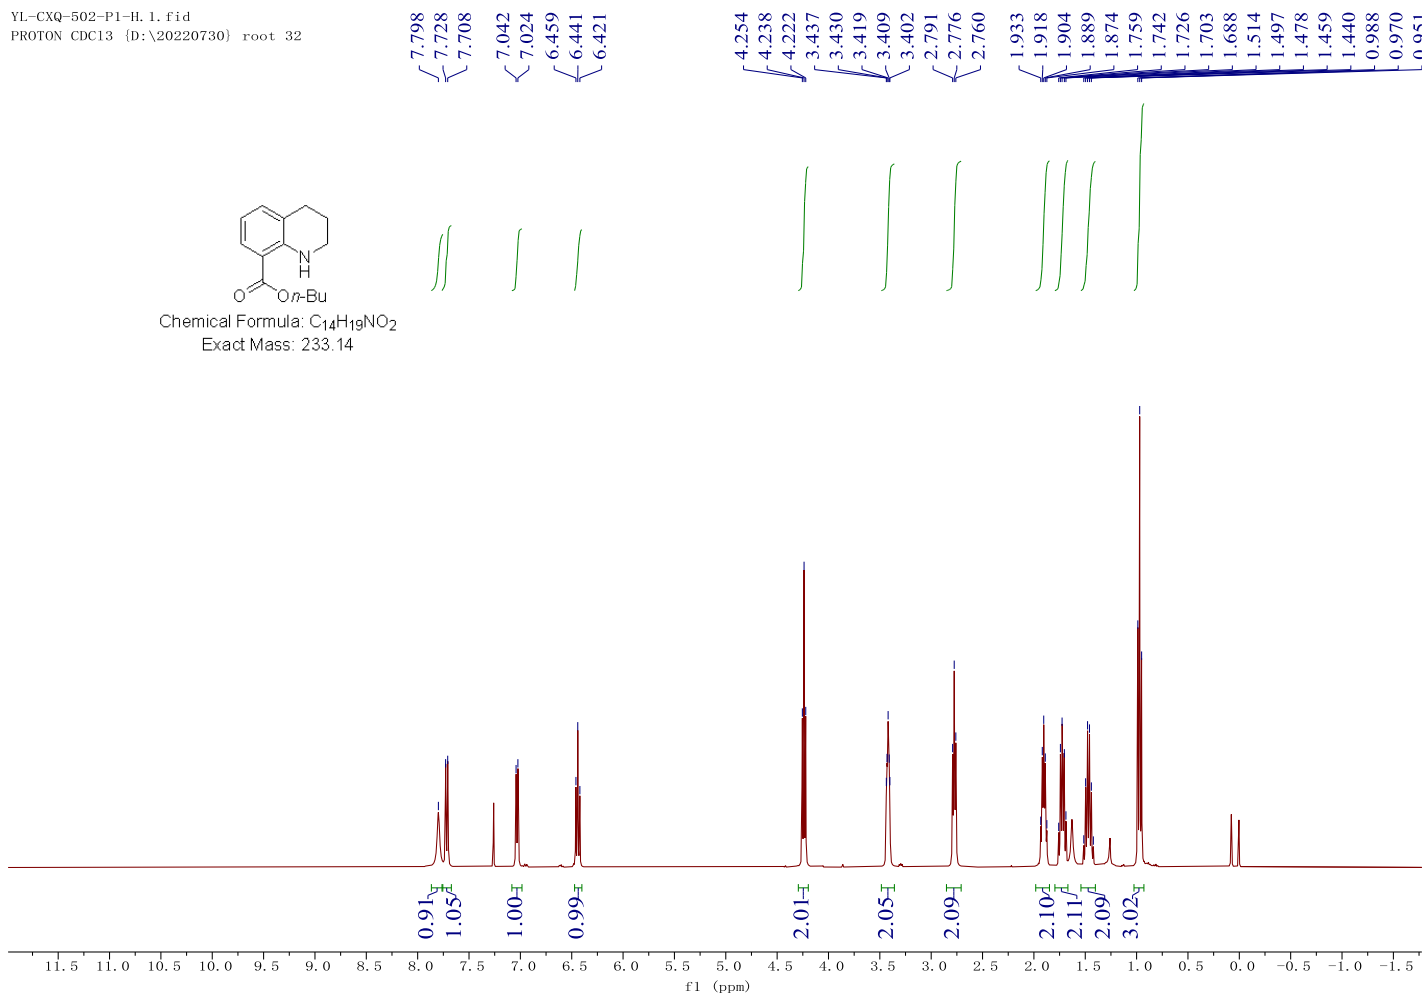

# $^{13}\text{C}\{^1\text{H}\}$ NMR (101 MHz, $\text{CDCl}_3$ ) spectrum of compound **5eb**

YL-CXQ-502-C. 1. fid  
C13CPD CDC13 (D:\20220804)

root 16

169.02  
148.52  
133.75  
129.47  
122.14  
113.56  
108.79  
77.48  
77.16  
76.84  
64.03  
41.30  
30.96  
27.93  
20.92  
19.45  
13.91

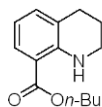

Chemical Formula:  $\text{C}_{14}\text{H}_{19}\text{NO}_2$   
Exact Mass: 233.14

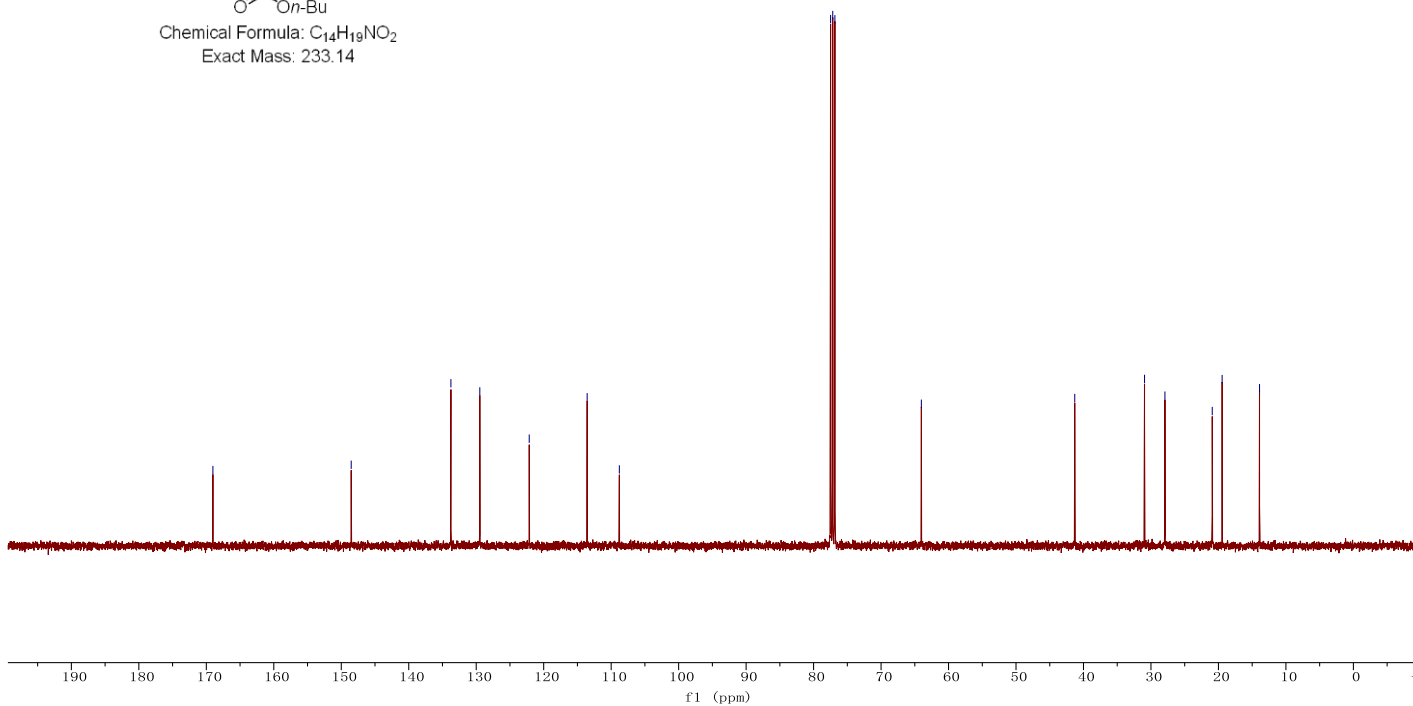

# <sup>1</sup>H NMR (400 MHz, CDCl<sub>3</sub>) spectrum of compound 5ha

YL-CXQ-503-P1-H. 1. fid  
PROTON CDC13 {D:\20220731} root 21

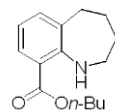

Chemical Formula: C<sub>15</sub>H<sub>21</sub>NO<sub>2</sub>  
Exact Mass: 247.16

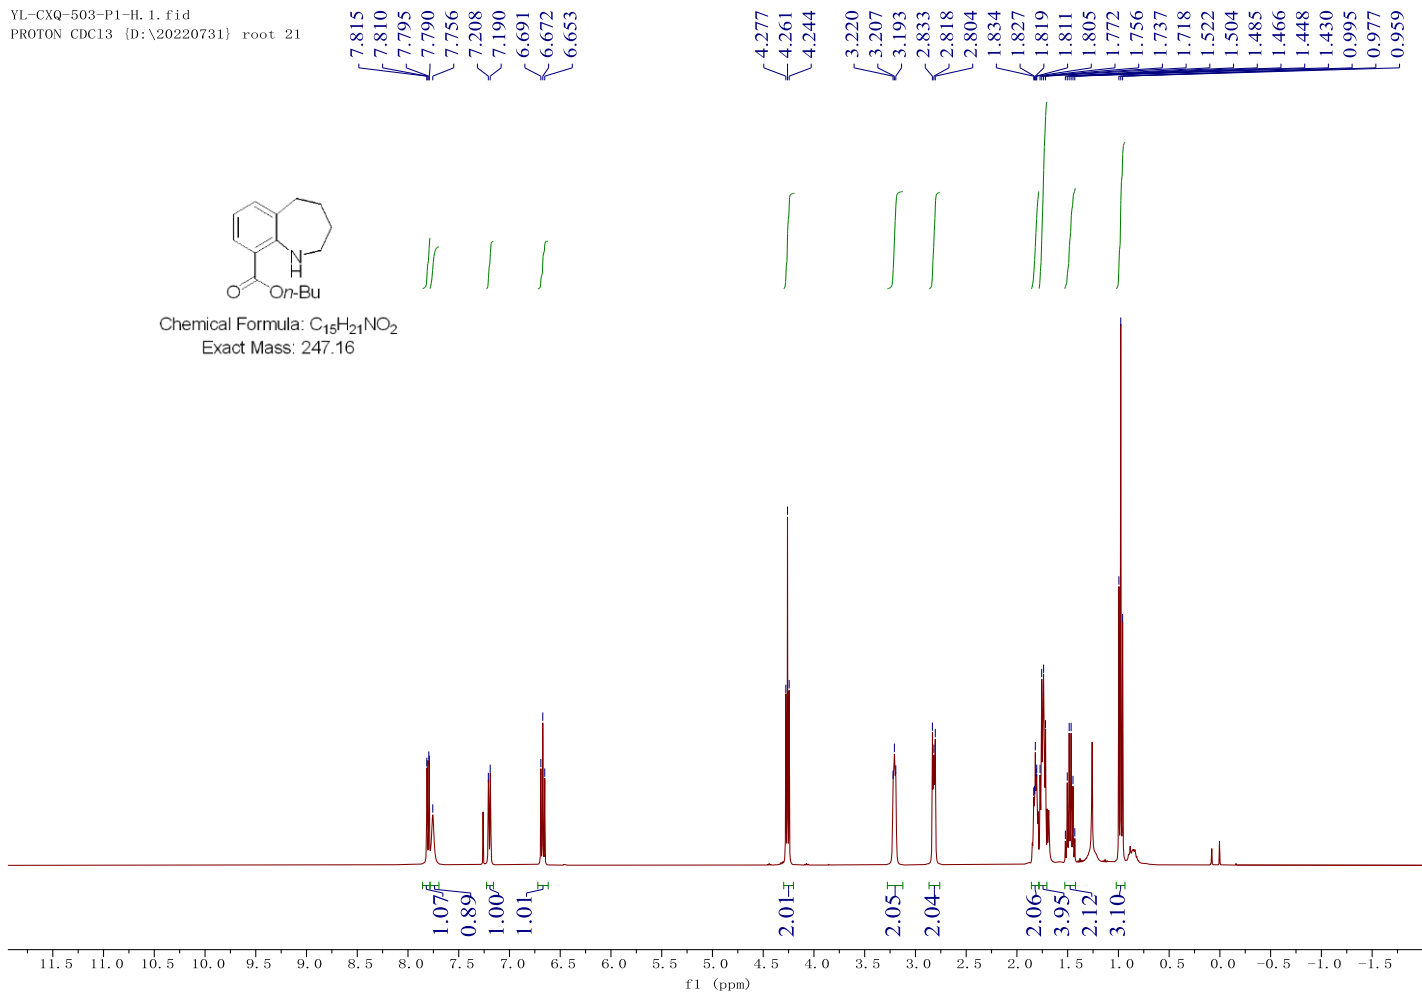

# $^{13}\text{C}\{^1\text{H}\}$ NMR (101 MHz, $\text{CDCl}_3$ ) spectrum of compound **5ha**

YL-CXQ-503-C. 1. 1. 1.r  
C13CPD CDC13 (D:\2022080

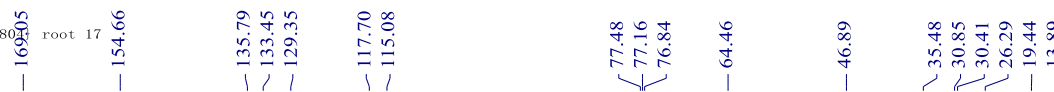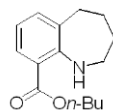

Chemical Formula:  $\text{C}_{15}\text{H}_{21}\text{NO}_2$   
Exact Mass: 247.16

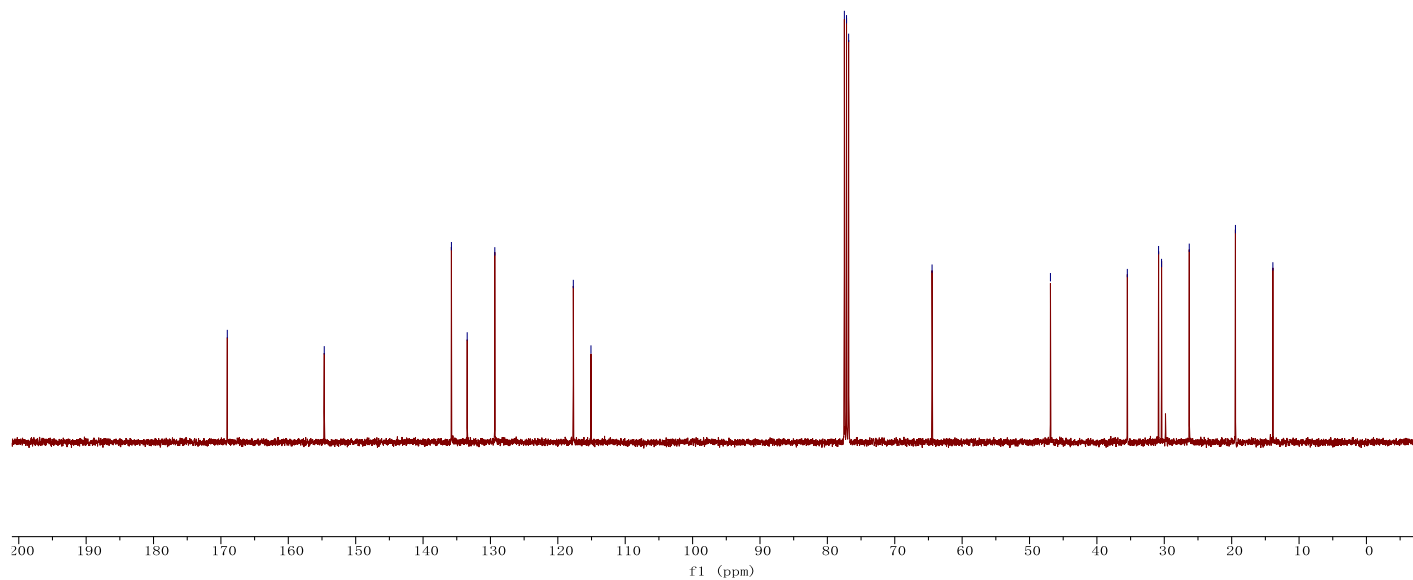

# <sup>1</sup>H NMR (400 MHz, CDCl<sub>3</sub>) spectrum of compound 5gb

YL-WL-C8.1.fid  
PROTON CDC13 (D:\20231007) root 4

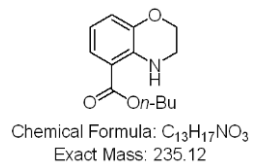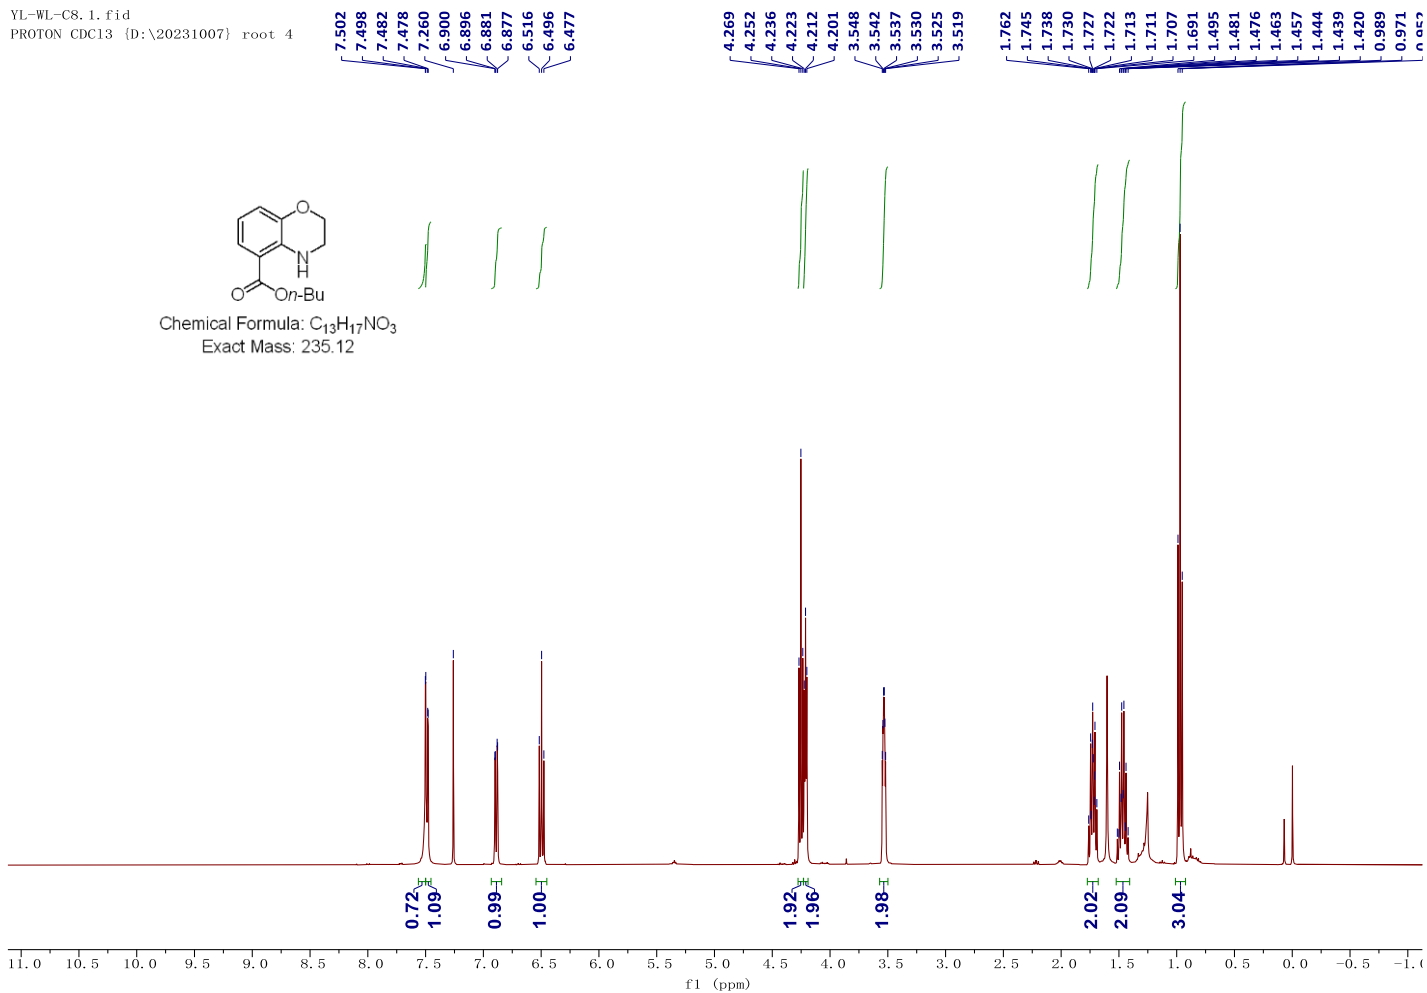

# $^{13}\text{C}\{^1\text{H}\}$ NMR (101 MHz, $\text{CDCl}_3$ ) spectrum of compound **5gb**

YL-WL-C8. 2. 1. 1r  
C13CPD CDC13 (D:\2023100 root 4

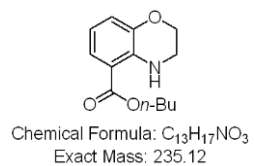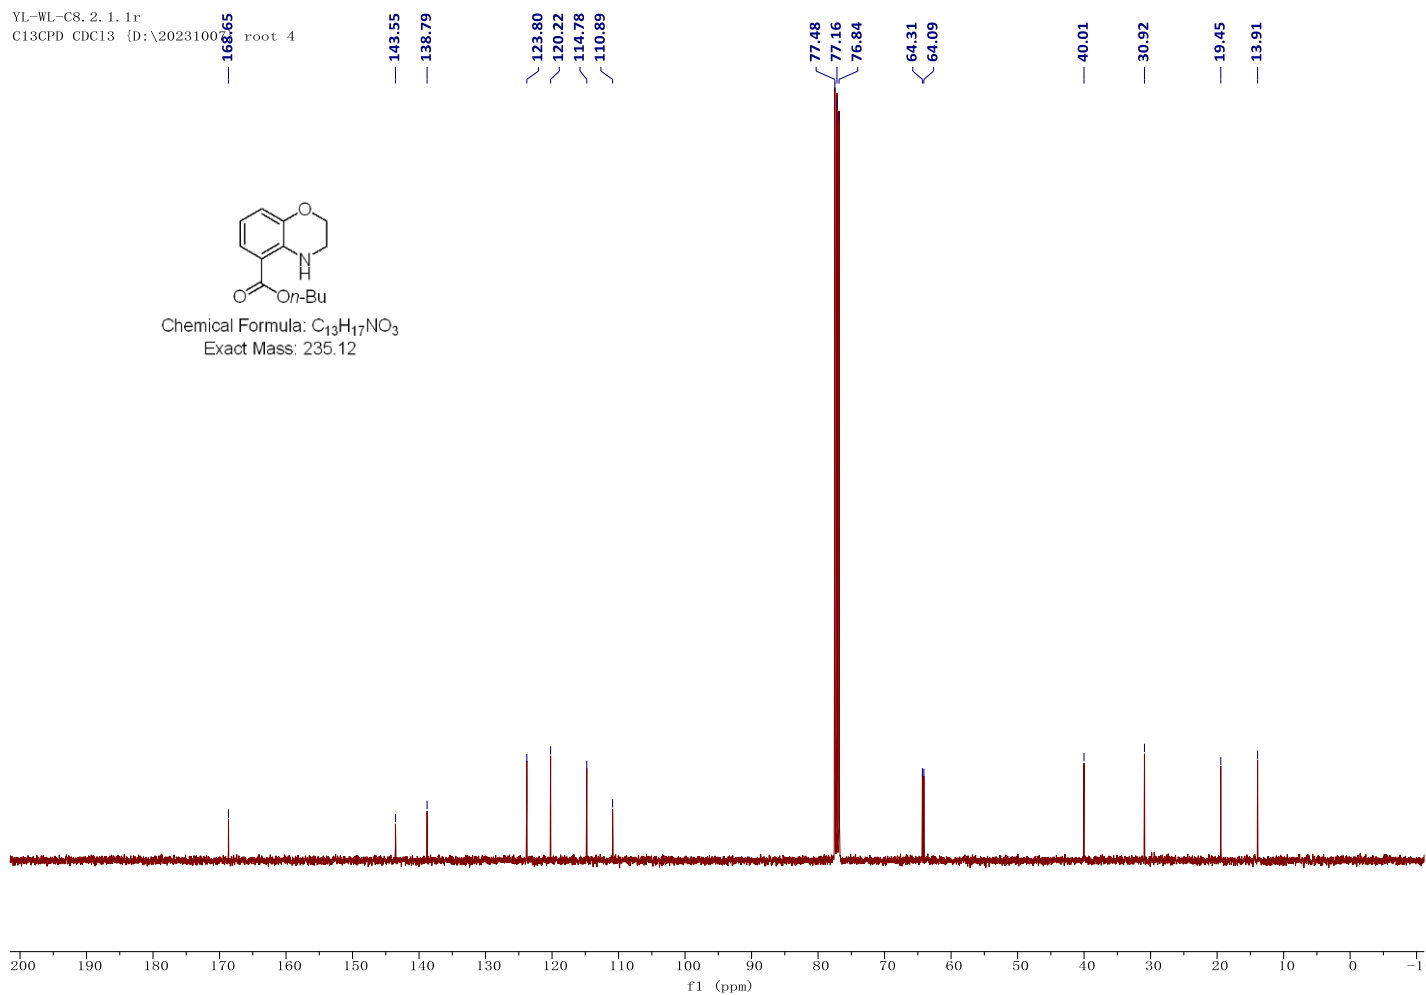



# <sup>1</sup>H NMR (400 MHz, CDCl<sub>3</sub>) spectrum of compound 5aa

YL-WL-325.1.fid  
PROTON CDC13 (D:\2024030

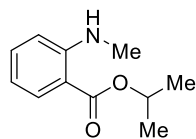

Chemical Formula: C<sub>11</sub>H<sub>15</sub>NO<sub>2</sub>  
Exact Mass: 193.11

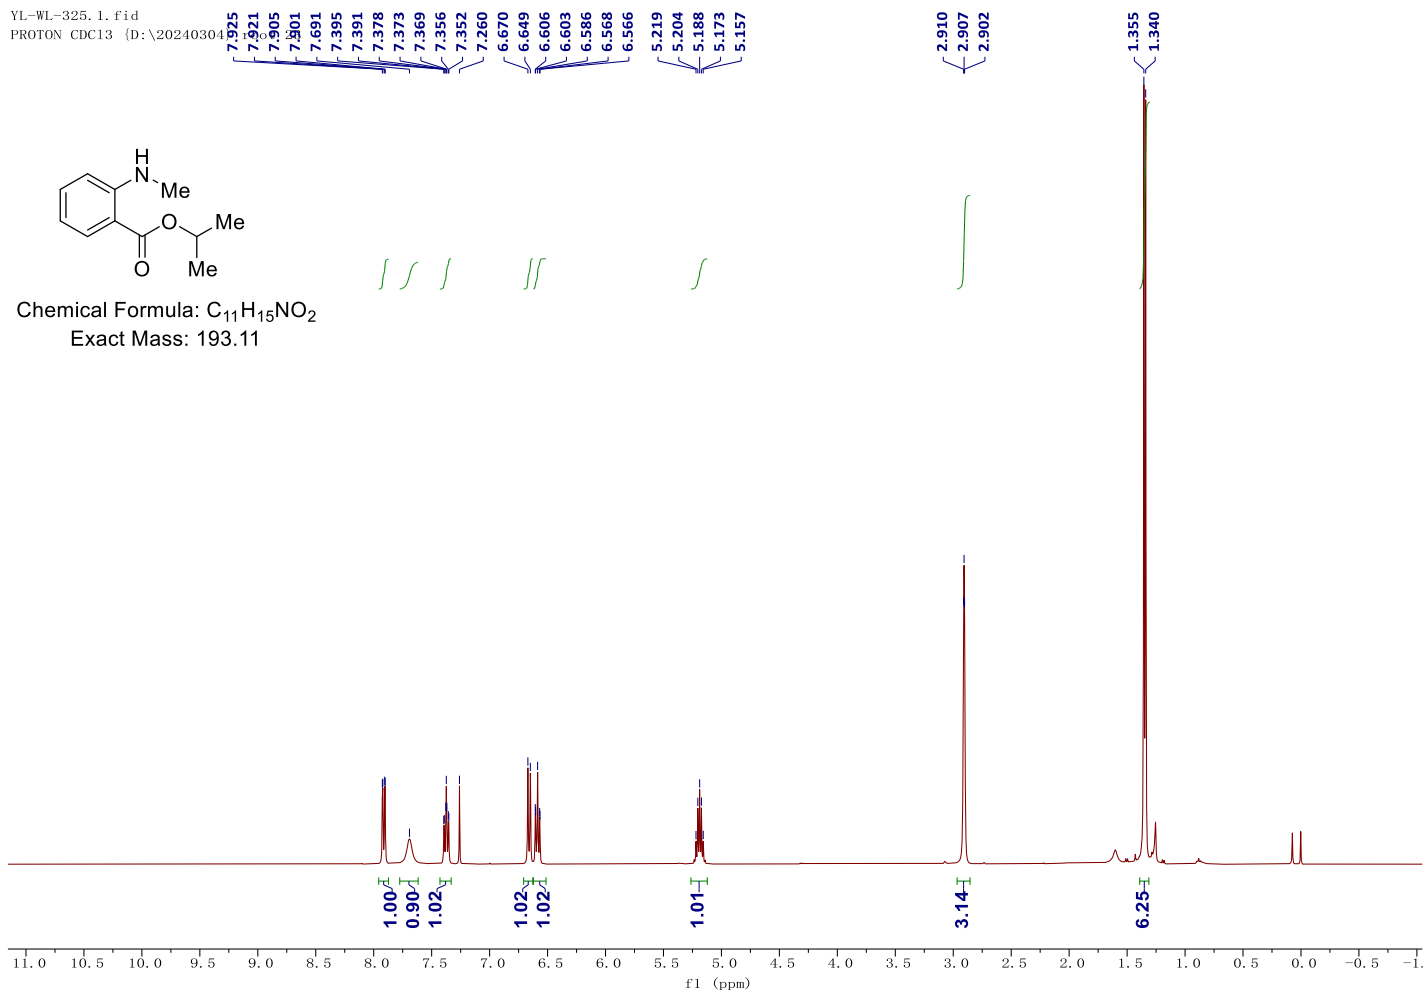

# $^{13}\text{C}\{^1\text{H}\}$ NMR (101 MHz, $\text{CDCl}_3$ ) spectrum of compound 5aa

YL-WL-325. 2. fid  
C13CPD CDC13 (D:\2024030

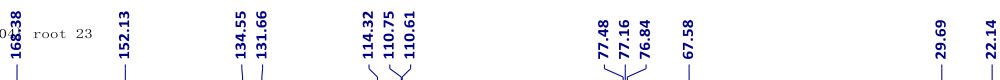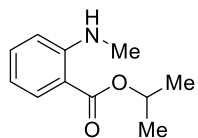

Chemical Formula:  $\text{C}_{11}\text{H}_{15}\text{NO}_2$

Exact Mass: 193.11

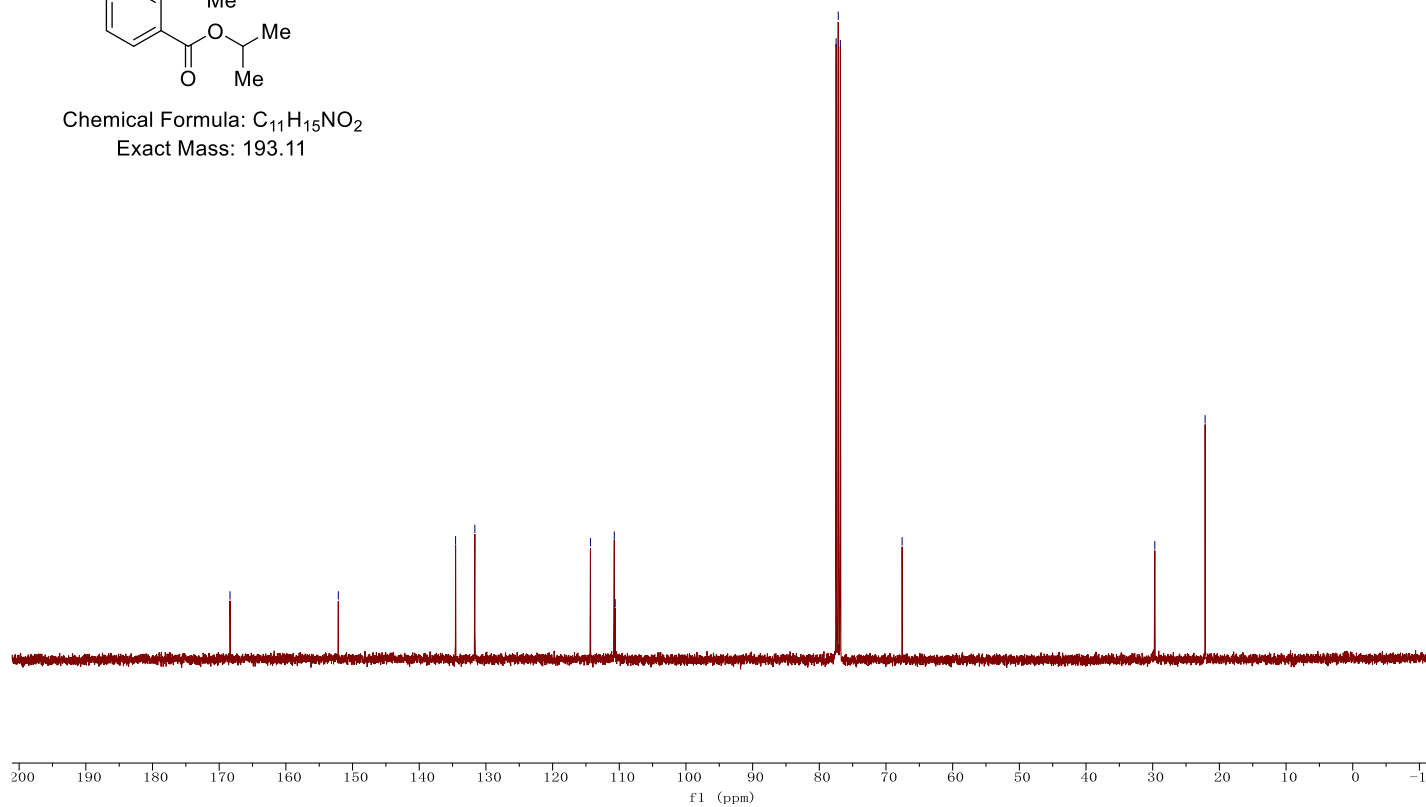

# <sup>1</sup>H NMR (400 MHz, CDCl<sub>3</sub>) spectrum of compound 5ai

YL-ZXY-173.1.fid  
PROTON CDCl3 [D:\20240304

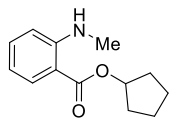

Chemical Formula: C<sub>13</sub>H<sub>17</sub>NO<sub>2</sub>  
Exact Mass: 219.13

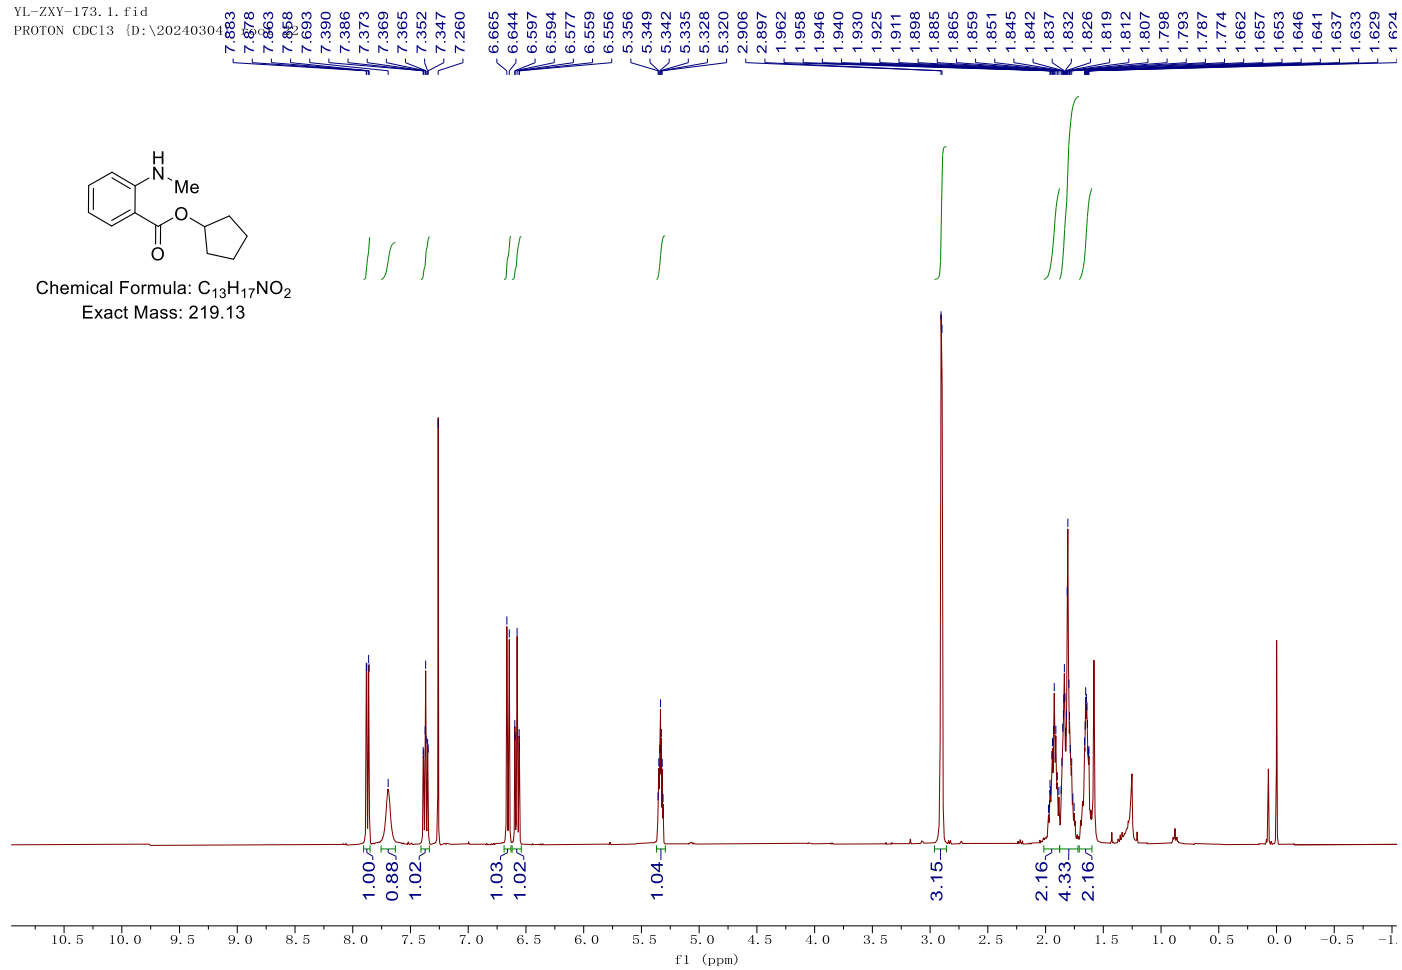

# $^{13}\text{C}\{^1\text{H}\}$ NMR (101 MHz, $\text{CDCl}_3$ ) spectrum of compound 5ai

YL-ZXY-173.2.fid  
C13CPD CDC13 (D:\2024030

root 22

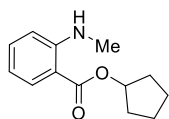

Chemical Formula:  $\text{C}_{13}\text{H}_{17}\text{NO}_2$   
Exact Mass: 219.13

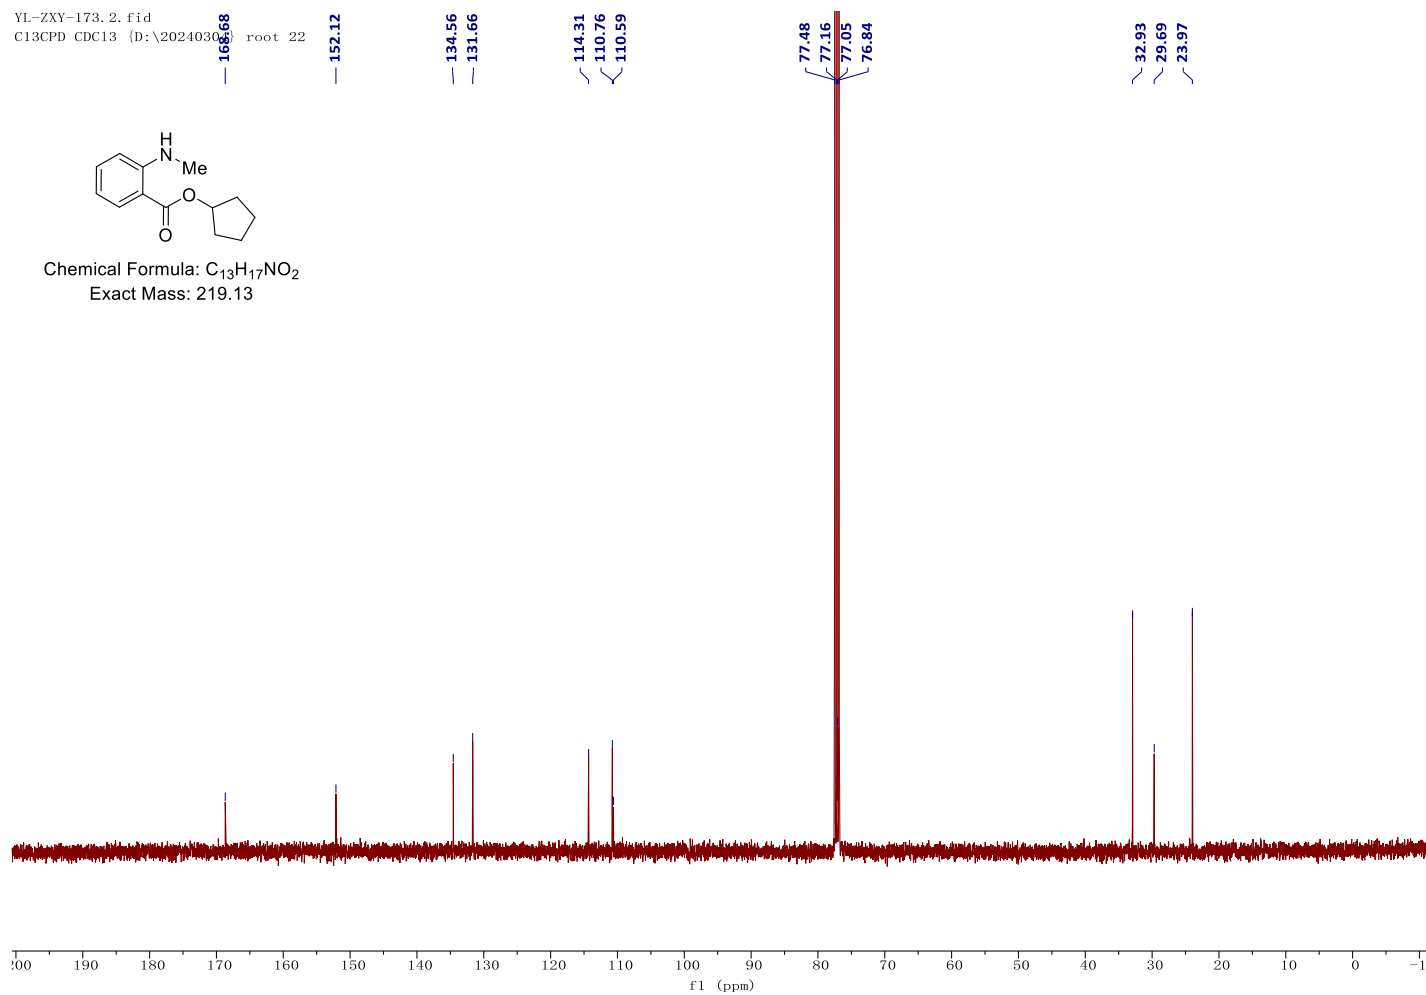

# <sup>1</sup>H NMR (400 MHz, CDCl<sub>3</sub>) spectrum of compound 5fa

YL-ZXY-179.1.fid  
PROTON CDC13 (D:\20240306) root

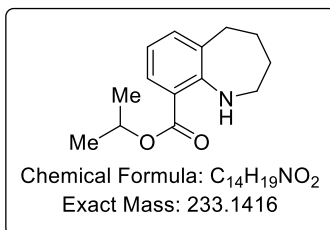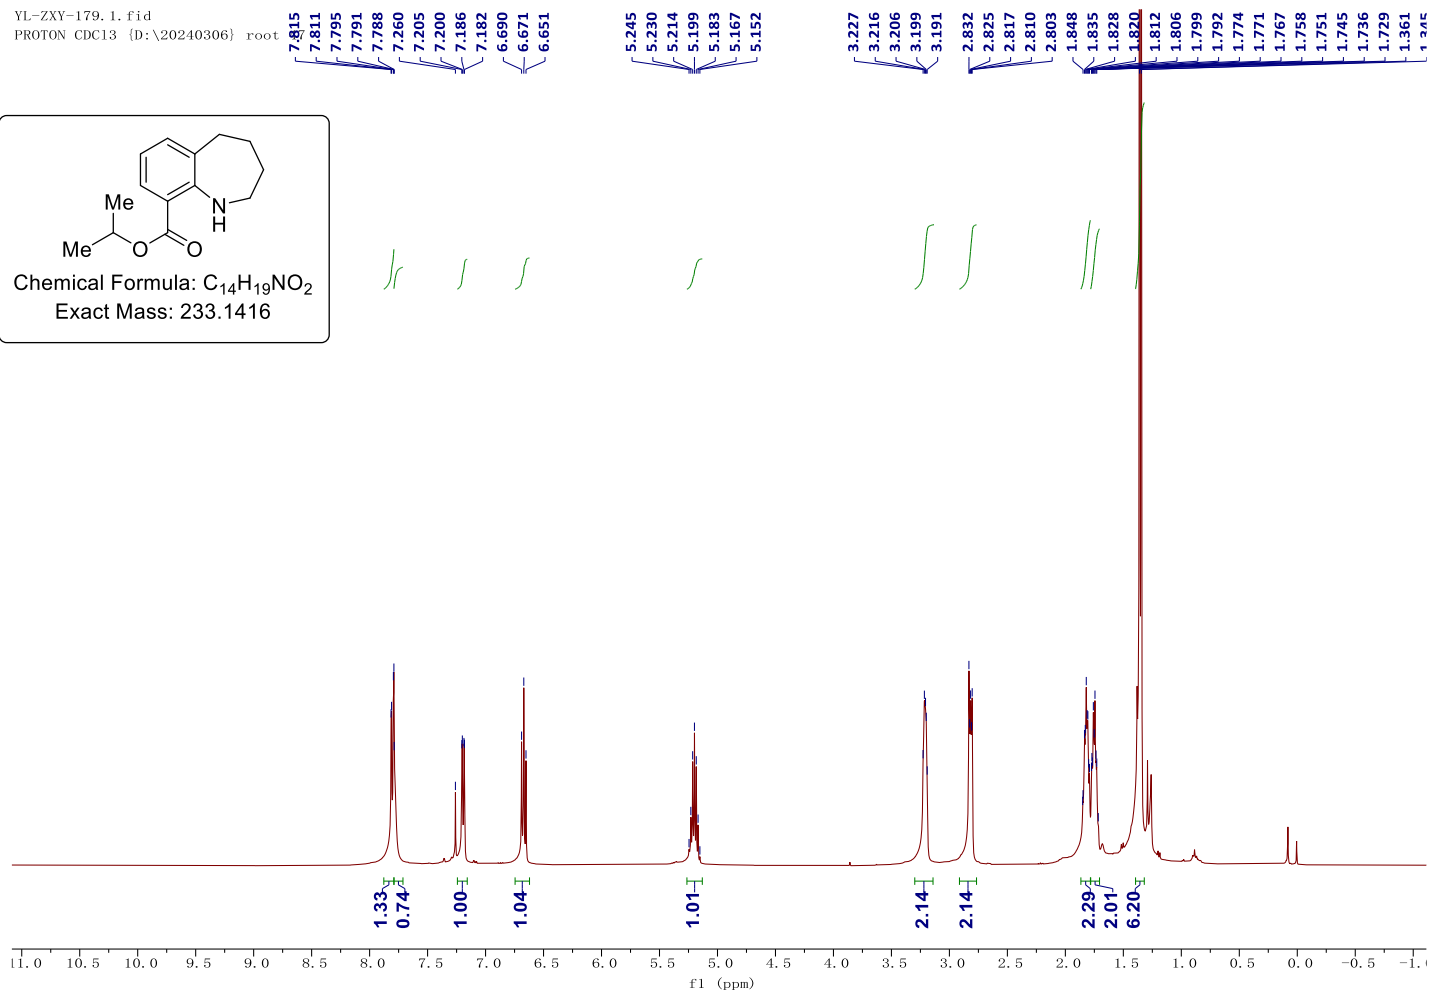

# $^{13}\text{C}\{^1\text{H}\}$ NMR (101 MHz, $\text{CDCl}_3$ ) spectrum of compound **5fa**

YL-ZXY-179.2.fid  
C13CPD CDC13 (D:\2024030

root 47

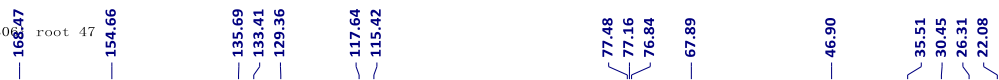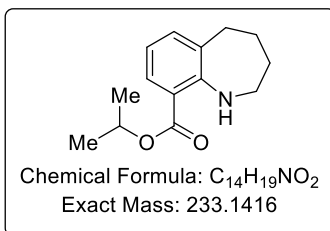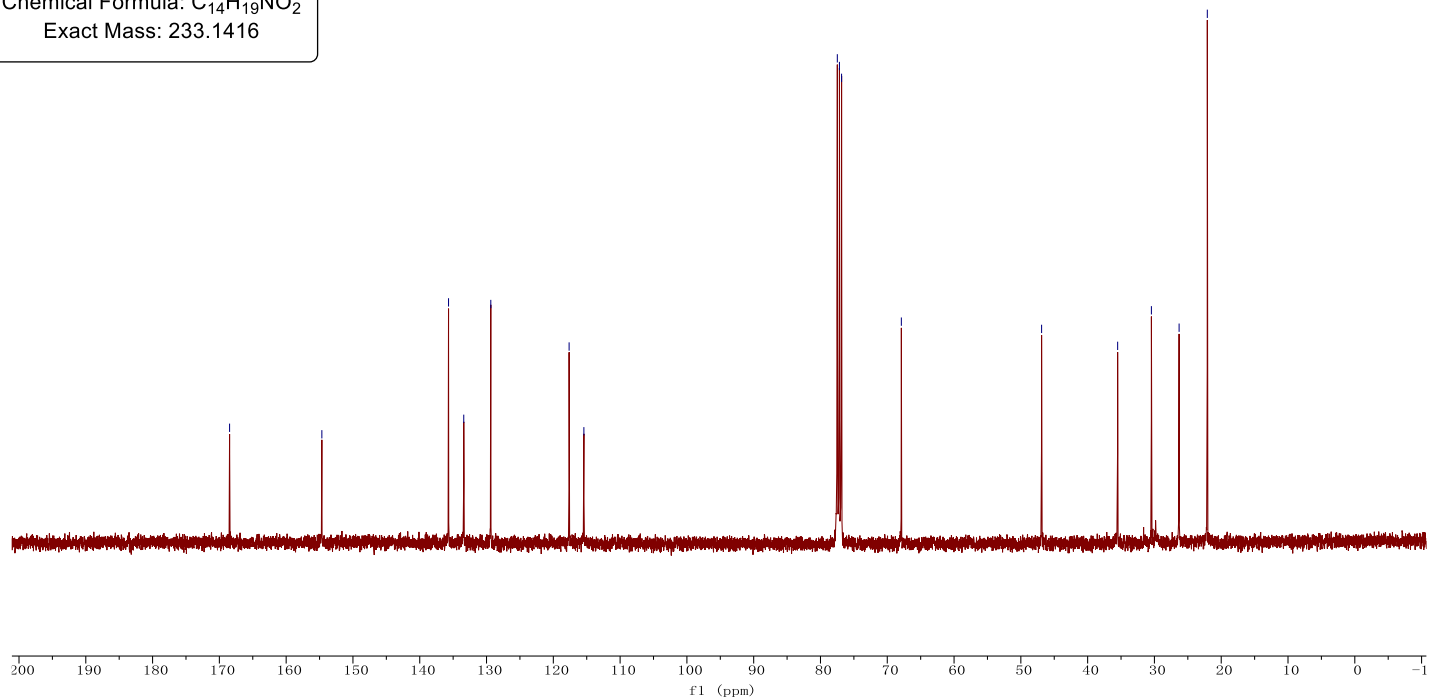

# <sup>1</sup>H NMR (400 MHz, CDCl<sub>3</sub>) spectrum of compound 5fi

YL-WL-331.1.fid  
PROTON CDC13 (D:\20240306) root 46

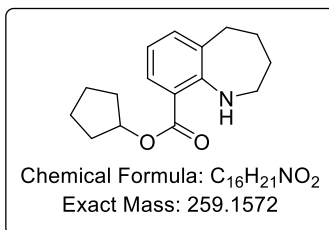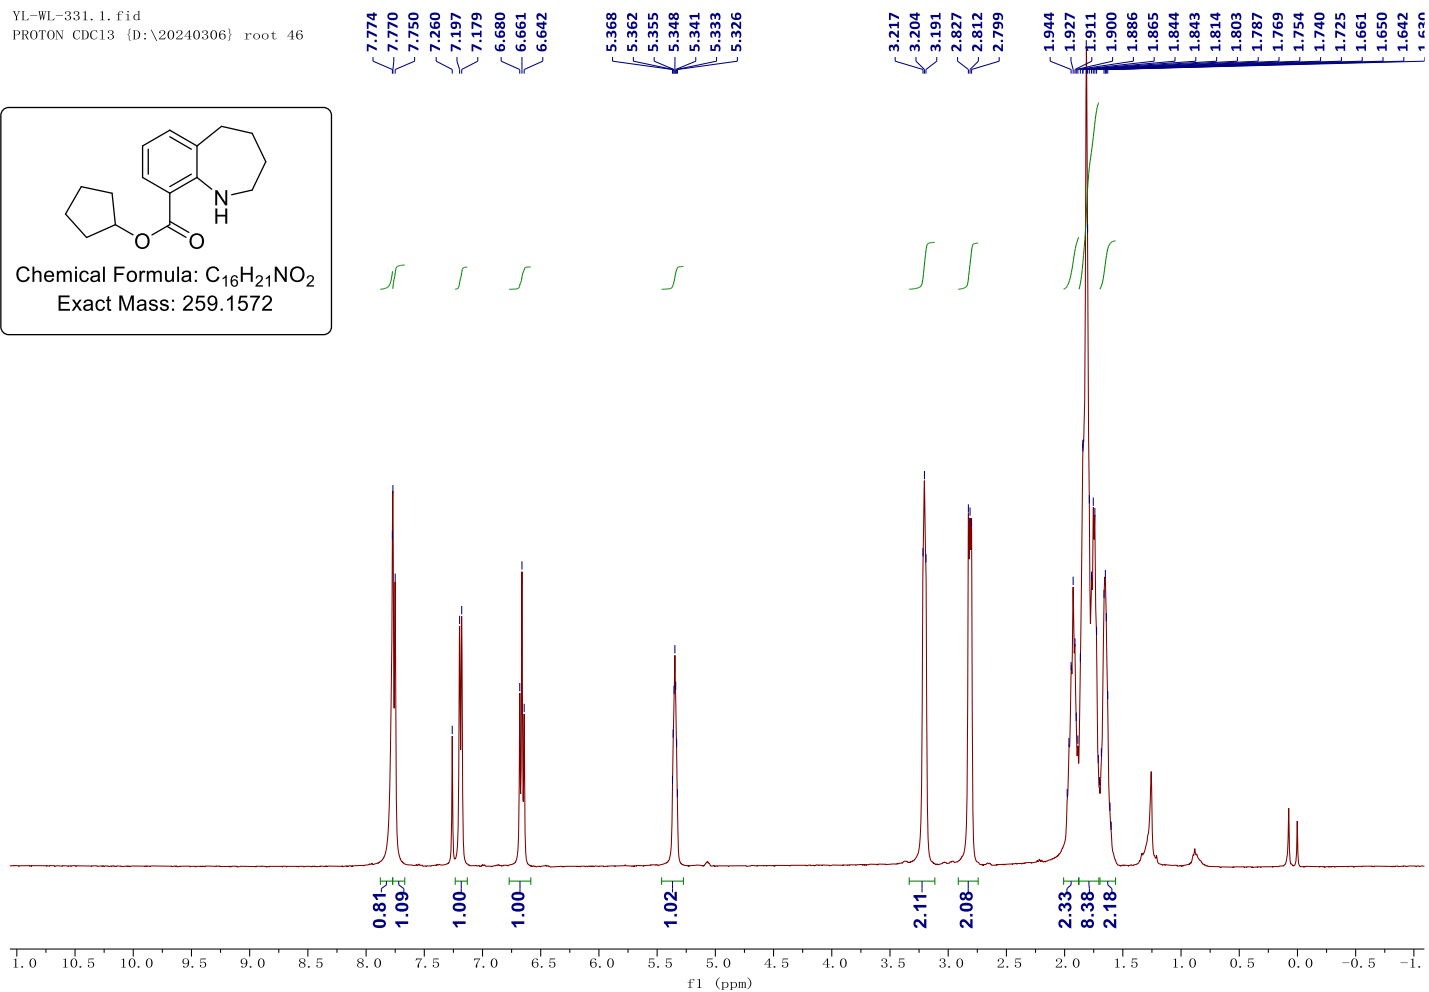

# $^{13}\text{C}\{^1\text{H}\}$ NMR (101 MHz, $\text{CDCl}_3$ ) spectrum of compound **5fi**

YL-ZXY-158. 2. fid  
C13CPD CDC13 (D:\2024030

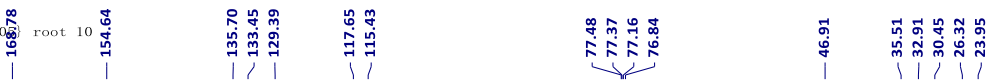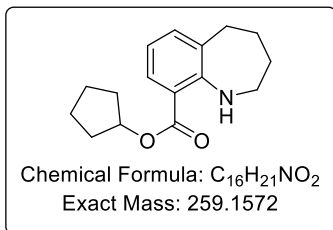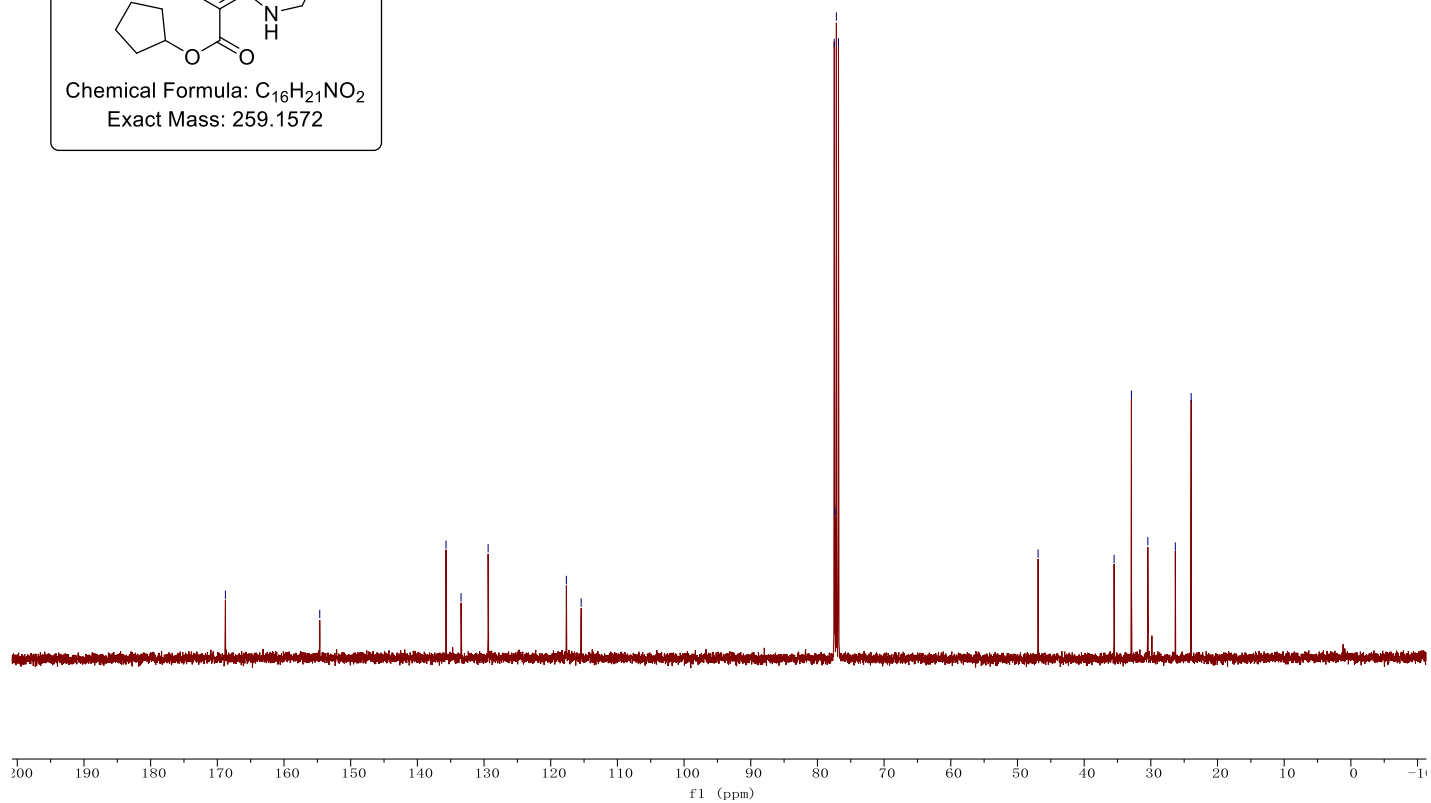

Supplement: d4qo00276h1.pdf [file d4qo00276h1.pdf]
